# Supplementary material for: Identification of Single-Nucleotide Polymorphisms (SNPs) Associated with Heat Tolerance at the Reproductive Stage in Synthetic Hexaploid Wheats Using GWAS
Source: MDPI journal article supplement (doi:10.3390/plants12081610), 2023-04-10
Supplement: s1 [file s1]

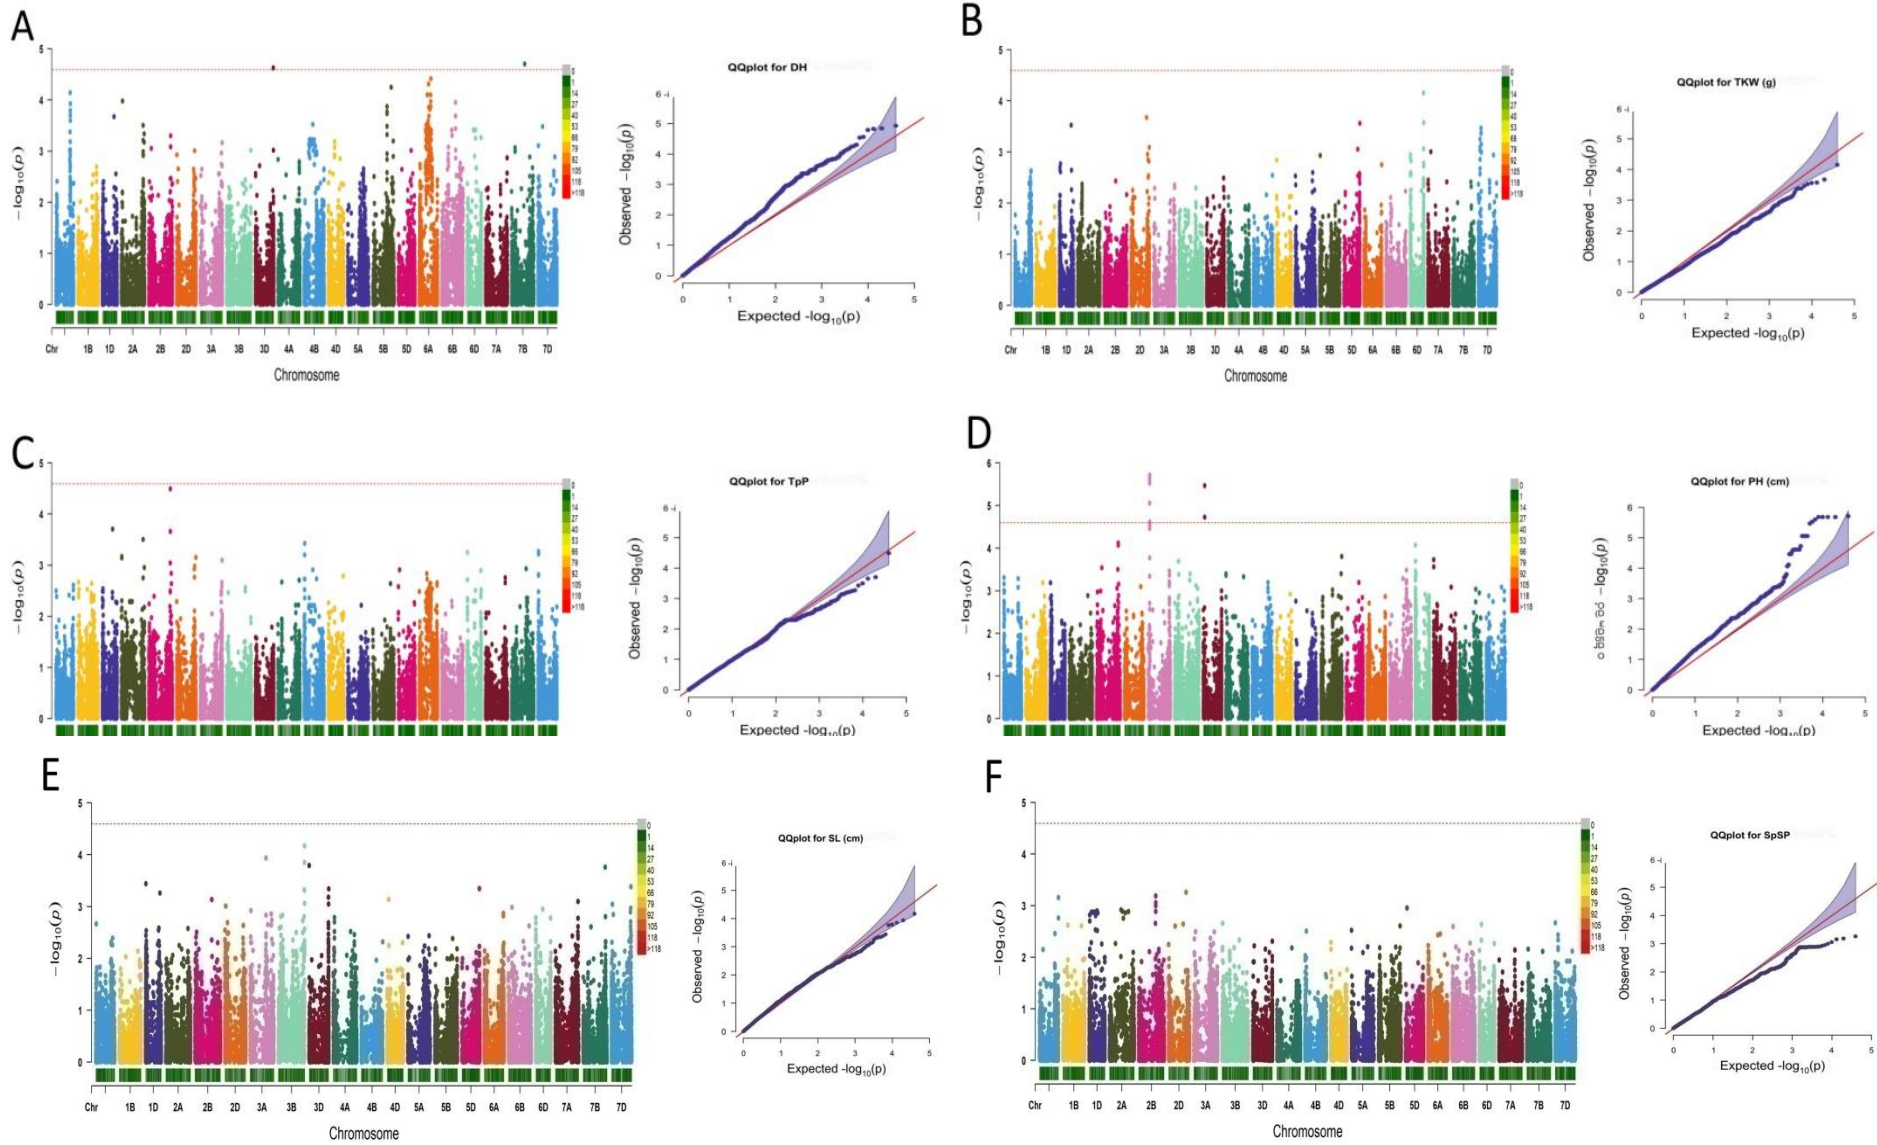

Continue...

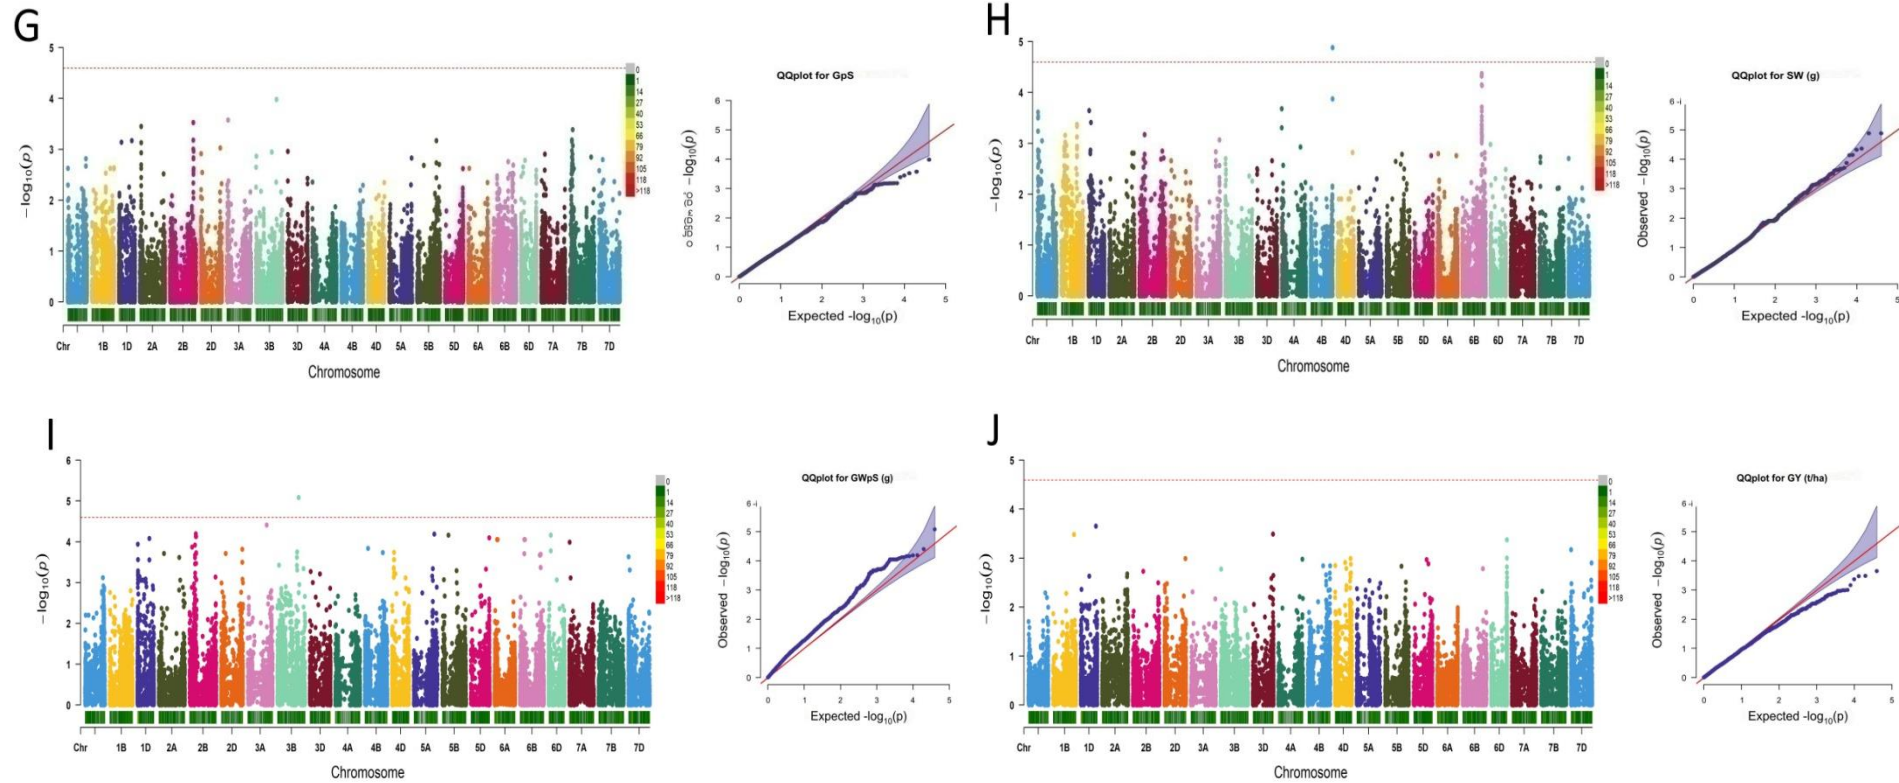

**Figure S1.** Manhattan and quantile-quantile (QQ) plots of various phenotypic traits including DH (A), TKW (B), TpP (C), PH (D), SL (E), SpSP (F), GpS (G), SW (H), GWpS (I) and GY (H) using BLUP values.

Abbreviations: DH: days to heading; DM: days to maturity; TpP: Tillers per plant; PH: Plant height; SL: Spike length; SpSP: Spikelets per spike; GpS: Grains per spike; SW: Spike weight; GWpS: Grain weight per spike; GY: Grain yield; TKW: Thousand kernel weight
