# Supplementary material for: Identification of Single-Nucleotide Polymorphisms (SNPs) Associated with Heat Tolerance at the Reproductive Stage in Synthetic Hexaploid Wheats Using GWAS
Source: Plants (Basel). 2023 Apr 10;12(8):1610. doi: 10.3390/plants12081610 (PMC10142051; doi:10.3390/plants12081610)
Supplement: Supplementary file 1 [file plants-12-01610-s001.zip › tables S1-S5.xlsx]

## Sheet: Table S1
Supplementary table S1:Names and pedigree of 180 genotypes used in this study
Sr. No	Genotypes	Pedigree
1.	AUS30280	CROC_1/AE.SQUARROSA (275)
2.	AUS30282	DOY1/AE.SQUARROSA (334)
3.	AUS30283	CPI/GEDIZ/3/GOO//JO69/CRA/4/AE.SQUARROSA (334)
4.	AUS30284	AAZ_3/AE.SQUARROSA (398)
5.	AUS30286	DOY1/AE.SQUARROSA (418)
6.	AUS30287	STY-US/CELTA//PALS/3/SRN_5/4/AE.SQUARROSA (418)
7.	AUS30288	CROC_1/AE.SQUARROSA (466)
8.	AUS30290	ALTAR 84/AE.SQUARROSA (502)
9.	AUS30291	CROC_1/AE.SQUARROSA (516)
10.	AUS30294	DOY1/AE.SQUARROSA (526)
11.	AUS30295	ARLIN_1/AE.SQUARROSA (536)
12.	AUS30296	DOY1/AE.SQUARROSA (1016)
13.	AUS30297	DOY1/AE.SQUARROSA (1024)
14.	AUS30298	CETA/AE.SQUARROSA (1025)
15.	AUS30299	DVERD_2/AE.SQUARROSA (1027)
16.	AUS30300	DOY1/AE.SQUARROSA (1027)
17.	AUS30302	CETA/AE.SQUARROSA (1030)
18.	AUS30303	CETA/AE.SQUARROSA (166)
19.	AUS30304	CETA/AE.SQUARROSA (172)
20.	AUS30305	CPI/GEDIZ/3/GOO//JO/CRA/4/AE.SQUARROSA (184)
21.	AUS30625	GAN/AE.SQUARROSA (180)
22.	AUS30627	D67.2/P66.270//AE.SQUARROSA (257)
23.	AUS30628	LCK59.61/AE.SQUARROSA (308)
24.	AUS30629	ARLIN/AE.SQUARROSA (308)
25.	AUS30630	LCK59.61/AE.SQUARROSA (313)
26.	AUS30631	LCK59.61/AE.SQUARROSA (324)
27.	AUS30632	SRN/AE.SQUARROSA (358)
28.	AUS30633	SCOOP_1/AE.SQUARROSA (358)
29.	AUS30634	SCOOP_1/AE.SQUARROSA (407)
30.	AUS30635	GAN/AE.SQUARROSA (408)
31.	AUS30636	STY-US/CELTA//PALS/3/SRN_5/4/AE.SQUARROSA (431)
32.	AUS30637	YAV_2/TEZ//AE.SQUARROSA (437)
33.	AUS30639	YAV79//DACK/RABI/3/SNIPE/4/AE.SQUARROSA (457)
34.	AUS30640	YAV79//DACK/RABI/3/SNIPE/4/AE.SQUARROSA (490)
35.	AUS30641	YAR/AE.SQUARROSA (513)
36.	AUS30642	SCA/AE.SQUARROSA (518)
37.	AUS30643	TK SN1081/AE.SQUARROSA (519)
38.	AUS30644	SCA/AE.SQUARROSA (523)
39.	AUS30645	SNIPE/YAV79//DACK/TEAL/3/AE.SQUARROSA (528)
40.	AUS30646	BOTNO/AE.SQUARROSA (620)
41.	AUS30647	CIT71/CPT//AE.SQUARROSA (629)
42.	AUS30648	SNIPE/YAV79//DACK/TEAL/3/AE.SQUARROSA (629)
43.	AUS30649	SNIPE/YAV79//DACK/TEAL/3/AE.SQUARROSA (633)
44.	AUS30649	SNIPE/YAV79//DACK/TEAL/3/AE.SQUARROSA (633)
45.	AUS30650	SCOOP_1/AE.SQUARROSA (659)
46.	AUS30651	SCOOP_1/AE.SQUARROSA (662)
47.	AUS30652	6973/WARD.7463//74110/3/AE.SQUARROSA (665)
48.	AUS30653	ARLIN/AE.SQUARROSA (665)
49.	AUS30655	LCK59.61/AE.SQUARROSA (689)
50.	AUS30656	LCK59.61/AE.SQUARROSA (783)
51.	AUS30658	GAN/AE.SQUARROSA (897)
52.	AUS30658	GAN/AE.SQUARROSA (897)
53.	AUS30659	GARZA/BOY//AE.SQUARROSA (171)
54.	AUS30660	SCOT/MEXI_1//AE.SQUARROSA (186)
55.	AUS30661	GARZA/BOY//AE.SQUARROSA (270)
56.	AUS30662	GARZA/BOY//AE.SQUARROSA (276)
57.	AUS30663	GARZA/BOY//AE.SQUARROSA (280)
58.	AUS30664	GARZA/BOY//AE.SQUARROSA (281)
59.	AUS30665	ARLIN/AE.SQUARROSA (283)
60.	AUS30667	GARZA/BOY//AE.SQUARROSA (294)
61.	AUS30668	DVERD_2/AE.SQUARROSA (295)
62.	AUS30669	GARZA/BOY//AE.SQUARROSA (300)
63.	AUS30670	FALCIN/AE.SQUARROSA (312)
64.	AUS30670	FALCIN/AE.SQUARROSA (312)
65.	AUS30671	RASCON/AE.SQUARROSA (314)
66.	AUS30672	KAPUDE/AE.SQUARROSA (314)
67.	AUS30673	SCOT/MEXI_1//AE.SQUARROSA (314)
68.	AUS30673	SCOT/MEXI_1//AE.SQUARROSA (314)
69.	AUS33376	ALTAR 84/AE.SQUARROSA (333)
70.	AUS33377	CROC_1/AE.SQUARROSA (333)
71.	AUS33378	DOY1/AE.SQUARROSA (333)
72.	AUS33379	GARZA/BOY//AE.SQUARROSA (350)
73.	AUS33380	GARZA/BOY//AE.SQUARROSA (366)
74.	AUS33381	RASCON/AE.SQUARROSA (367)
75.	AUS33382	GARZA/BOY//AE.SQUARROSA (374)
76.	AUS33383	DOY1/AE.SQUARROSA (415)
77.	AUS33384	GARZA/BOY//AE.SQUARROSA (427)
78.	AUS33385	DOY1/AE.SQUARROSA (428)
79.	AUS33386	GARZA/BOY//AE.SQUARROSA (433)
80.	AUS33388	DOY1/AE.SQUARROSA (458)
81.	AUS33389	GREEN/AE.SQUARROSA (458)
82.	AUS33390	GARZA/BOY//AE.SQUARROSA (503)
83.	AUS33391	ALTAR 84/AE.SQUARROSA (507)
84.	AUS33392	CROC_1/AE.SQUARROSA (507)
85.	AUS33393	DVERD_2/AE.SQUARROSA (507)
86.	AUS33394	GARZA/BOY//AE.SQUARROSA (520)
87.	AUS33395	DOY1/AE.SQUARROSA (532)
88.	AUS33398	CETA/AE.SQUARROSA (170)
89.	AUS33399	CETA/AE.SQUARROSA (174)
90.	AUS33401	CROC_1/AE.SQUARROSA (231)
91.	AUS33402	CETA/AE.SQUARROSA (256)
92.	AUS33403	DOY1/AE.SQUARROSA (256)
93.	AUS33404	GAN/AE.SQUARROSA (259)
94.	AUS33405	GAN/AE.SQUARROSA (285)
95.	AUS33405	GAN/AE.SQUARROSA (285)
96.	AUS33406	SKARV_2/AE.SQUARROSA (304)
97.	AUS33407	DOY1/AE.SQUARROSA (318)
98.	AUS33408	DOY1/AE.SQUARROSA (322)
99.	AUS33409	CROC_1/AE.SQUARROSA (362)
100.	AUS33410	DOY1/AE.SQUARROSA (372)
101.	AUS33411	DOY1/AE.SQUARROSA (390)
102.	AUS33412	SCA/AE.SQUARROSA (409)
103.	AUS33414	GAN/AE.SQUARROSA (413)
104.	AUS33415	CROC_1/AE.SQUARROSA (444)
105.	AUS33417	STY-US/CELTA//PALS/3/SRN_5/4/AE.SQUARROSA (502)
106.	AUS33418	CROC_1/AE.SQUARROSA (517)
107.	AUS33419	CETA/AE.SQUARROSA (540)
108.	AUS33420	DVERD_2/AE.SQUARROSA (1016)
109.	AUS33421	DVERD_2/AE.SQUARROSA (1022)
110.	AUS33422	CETA/AE.SQUARROSA (1022)
111.	AUS33424	CETA/AE.SQUARROSA (1027)
112.	AUS34230	68.111/RGB-U//WARD RESEL/3/STIL/4/AE.SQUARROSA (164)
113.	AUS34232	DOY1/AE.SQUARROSA (188)
114.	AUS34233	RABI//GS/CRA/3/AE.SQUARROSA (190)
115.	AUS34234	ALTAR 84/AE.SQUARROSA (191)
116.	AUS34234	ALTAR 84/AE.SQUARROSA (191)
117.	AUS34235	68.111/RGB-U//WARD/3/FGO/4/RABI/5/AE.SQUARROSA (191)
118.	AUS34236	ALTAR 84/AE.SQUARROSA (193)
119.	AUS34237	CPI/GEDIZ/3/GOO//JO69/CRA/4/AE.SQUARROSA (193)
120.	AUS34238	CPI/GEDIZ/3/GOO//JO69/CRA/4/AE.SQUARROSA (196)
121.	AUS34240	CROC_1/AE.SQUARROSA (205)
122.	AUS34242	CPI/GEDIZ/3/GOO//JO69/CRA/4/AE.SQUARROSA (208)
123.	AUS34243	SORA/AE.SQUARROSA (208)
124.	AUS34244	CROC_1/AE.SQUARROSA (210)
125.	AUS34244	CROC_1/AE.SQUARROSA (210)
126.	AUS34245	D67.2/P66.270//AE.SQUARROSA (211)
127.	AUS34247	CROC_1/AE.SQUARROSA (213)
128.	AUS34248	DVERD_2/AE.SQUARROSA (214)
129.	AUS34249	ROK/KML//AE.SQUARROSA (214)
130.	AUS34250	D67.2/P66.270//AE.SQUARROSA (217)
131.	AUS34251	YUK/AE.SQUARROSA (217)
132.	AUS34252	ALTAR 84/AE.SQUARROSA (219)
133.	AUS34253	D67.2/P66.270//AE.SQUARROSA (220)
134.	AUS34254	DVERD_2/AE.SQUARROSA (221)
135.	AUS34254	DVERD_2/AE.SQUARROSA (221)
136.	AUS34255	D67.2/P66.270//AE.SQUARROSA (221)
137.	AUS34256	TK SN1081/AE.SQUARROSA (222)
138.	AUS34257	D67.2/P66.270//AE.SQUARROSA (222)
139.	AUS34259	ALTAR 84/AE.SQUARROSA (223)
140.	AUS34260	D67.2/P66.270//AE.SQUARROSA (223)
141.	AUS34261	CROC_1/AE.SQUARROSA (224)
142.	AUS34262	ALTAR 84/AE.SQUARROSA (224)
143.	AUS34266	DVERD_2/AE.SQUARROSA (247)
144.	AUS34267	GARZA/BOY//AE.SQUARROSA (271)
145.	AUS34268	SCA/AE.SQUARROSA (279)
146.	AUS34270	GARZA/BOY//AE.SQUARROSA (286)
147.	AUS34271	ACO89/AE.SQUARROSA (290)
148.	AUS34272	GARZA/BOY//AE.SQUARROSA (307)
149.	AUS34274	68.111/RGB-U//WARD/3/AE.SQUARROSA (321)
150.	AUS34275	68.111/RGB-U//WARD/3/AE.SQUARROSA (322)
151.	AUS34277	68.111/RGB-U//WARD/3/AE.SQUARROSA (325)
152.	AUS34278	68.111/RGB-U//WARD/3/AE.SQUARROSA (328)
153.	AUS34279	ALTAR 84/AE.SQUARROSA (328)
154.	AUS34280	68.111/RGB-U//WARD/3/AE.SQUARROSA (329)
155.	AUS34411	SORA/AE.SQUARROSA (211)
156.	AUS34423	CROC_1/AE.SQUARROSA (224)
157.	AUS34433	DOY1/AE.SQUARROSA (447)
158.	AUS34434	68.111/RGB-U//WARD RESEL/3/STIL/4/AE.SQUARROSA (449)
159.	AUS34435	YAV79//DACK/RABI/3/SNIPE/4/AE.SQUARROSA (460)
160.	AUS34436	DOY1/AE.SQUARROSA (511)
161.	AUS34437	6973/WARD.7463//74110/3/AE.SQUARROSA (35A)
162.	AUS34439	CROC_1/AE.SQUARROSA (662)
163.	AUS34440	CROC_1/AE.SQUARROSA (725)
164.	AUS34442	CETA/AE.SQUARROSA (783)
165.	AUS34443	CROC_1/AE.SQUARROSA (784)
166.	AUS34444	CETA/AE.SQUARROSA (872)
167.	AUS34445	ALTAR 84/AE.SQUARROSA (192)
168.	AUS34445	ALTAR 84/AE.SQUARROSA (192)
169.	AUS34446	FGO/USA2111//AE.SQUARROSA (658)
170.	AUS34447	D67.2/P66.270//AE.SQUARROSA (221)
171.	AUS34448	ALTAR 84/AE.SQUARROSA (205)
172.	AUS34449	STY-US/CELTA//PALS/3/SRN_5
173.	AUS34451	ROK/KML//AE.SQUARROSA (214)
174.	AUS34452	D67.2/P66.270//AE.SQUARROSA (218)
175.	AUS34453	CROC_1/AE.SQUARROSA (205)
176.	AUS34455	D67.2/P66.270//AE.SQUARROSA (213)
177.	AUS34456	D67.2/P66.270//AE.SQUARROSA (220)
178.	AUS34457	YAV_3/SCO//JO69/CRA/3/YAV79/4/AE.SQUARROSA (498)
179.	AUS34458	ALTAR 84/AE.SQUARROSA (221)
180.	AUS34459	YUK/AE.SQUARROSA (217)

## Sheet: Table S2
Supplementary Table S2. ANOVA of evaluated phenological traits under normal and late sowing during two years at three different locations.
SOV	df	MS	P≥F	MS	P≥F	MS	P≥F	MS	P≥F	MS	P≥F	MS	P≥F	MS	P≥F	MS	P≥F	MS	P≥F	MS	P≥F	MS	P≥F	MS	P≥F
		Days to heading		Days to Maturity		Plant Height		Tillers per Plant		Spike length		Spikelets per spike		Spike weight		Grains per spike		Grains weight per spike		Biomass per plant		Grain Yield per plant		Thousand kernel weight
Genotype	179	160.502	0	142	0	852	0	16.41	0	14.18	0	20.18	0	1.02211	0	310.1	0	0.7389	0	145	0	13.98	0	2.15.2	0
Location	2	219022	0	212411	0	1622	0	935.29	0	786.69	0	3423.45	0	18.9442	0	5765.4	0	62.5609	0	3738.6	0	262.78	0	3726.6	0
Treatment	1	345854	0	652450	0	597023	0	4042.3	0	5161.54	0	102.75	0	218.118	0	10592.4	0	78.1329	0	31717.1	0	4137.27	0	42970.8	0
Year	1	0.02981	0.9514	304	0	946	0	1.52	0.1848	50.1	0	1951.14	0	2.16358	0	3454.2	0	0.1561	0.467	4792.7	0	292.97	0	264.2	0
Genotype*Location	358	40.7933	0	38	0	185	0	6.21	0	5.42	0	12.59	0	0.85385	0	213	0	0.6092	0	96	0	10.25	0	169.2	0
Genotype*Treatment	136	68.047	0	117	0	295	0	5.03	0	3.96	0	3.38	0.2517	0.26474	0	25	0.3759	0.1297	0	16.3	0	1.96	0	59.1	0
Genotype*Year	136	10.1058	0.0538	34	0	10	0.8574	1.58	0	2.54	0	2.03	0.9966	0.03444	0.9991	12	1	0.0263	0.9952	20.5	0	2.7	0	12.2	0.9963
Location*Treatment	2	5325.86	0	246	0	21414	0	26.53	0	924.09	0	1611.99	0	10.4112	0	940.4	0	2.306	0	2166.5	0	147.48	0	2027.4	0
Location*Year	2	151.216	0	138	0.0001	133	0	2.33	0.0688	181.7	0	1419.66	0	0.01992	0.6993	672.2	0	0.5395	0	761.3	0	37.39	0	192.8	0
Treatment*Year	1	3.99088	0.4805	244	0	62	0.0238	173.45	0	455.12	0	2904.03	0	1.64504	0.9567	96.8	0.0454	0.7726	0	5	0.3006	8.76	0.0001	71.6	0.0493
Genotype*Location*Treatment	358	41.846	0	47	0	87	0	1.46	0	2.15	0	3.02	0.5603	0.2535	0	30.7	0.0208	0.1379	0	20.8	0	2.03	0	66	0
Genotype*Location*Year	358	7.75515	0.5999	12	0.8532	8	0.9998	1.12	0.016	2.16	0	2.02	0.9997	0.03519	0.9999	10	1	0.0271	0.9987	18.7	0	1.9	0	13.5	0.9946
Genotype*Treatment*Year	136	6.87568	0.839	33	0	15	0.0757	2.78	0	1.93	0.0015	3.29	0.3136	0.05337	0.6028	22.6	0.6468	0.0313	0.9289	4.9	0.3159	0.44	0.9461	21.7	0.1246
Location*Treatment*Year	2	86.9836	0	73	0.0006	428	0	7.33	0.0003	487.31	0	1566.86	0	1.39534	0	1390.7	0	0.5227	0	516.1	0	46.66	0	108	0.0032
Error	358	7.99706		14		12		0.86		1.26		3.07		0.05562		24		0.0391		4.7		0.56		18.4

## Sheet: Table S3
Supplementary Table S3a: Meteorological information of the Bahawalpur (BWP) for Normal planting and late planting during the two cropping season 2013/14 and 2014/15.
Month	Max. Temp (°C)	Min. Temp (°C)	Avg. Max Temp (°C)	Avg. Min. Temp (°C)	Max. RH (%)	Min. RH (%)	Avg.RH (%)
2013-11-01	31	11.1	28.9	12.8	74	46.1	60.6
2013-12-01	28.5	1.7	22.5	8.5	97.5	48.5	71.7
2014-01-01	27.2	0.6	20.7	5.6	96	44.3	60.9
2014-02-01	26.2	5.8	22.3	8.5	80.3	45.3	61.4
2014-03-01	33.6	9	27.8	13.7	73.7	38.3	57.4
2014-04-01	43	16.7	35.9	20	58.3	24	42.6
2014-05-01	45.5	19.5	39	25	66.3	26.3	41.8
2014-11-01	31.5	9.7	29.4	12.7	72	40	50.8
2014-12-01	28.5	1.7	20.7	7.3	93.3	49.7	69.2
2015-01-01	24.3	1.9	18.3	6.3	95.3	49	75.7
2015-02-01	27.5	6.9	23.8	10.7	82	42.3	65.4
2015-03-01	38.2	8.1	27	14.1	92	47	64.4
2015-04-01	44.5	15.6	36.6	21.8	71.1	24.7	44.2
2015-05-01	44.5	21.8	40.4	25.4	63.3	21	36.5
Max. Temp: Maximum temperature, Min. Temp: minimum temperature, Avg. Min Temp: average minimum temperature, Avg. Max. Temp: average maximum temperature, Max. RH: maximum relative humidity, Min. RH: minimum relative humidity, Av. RH: average relative humidity,
Supplementary Table S3b: Meteorological information of the Sindh (SND) for Normal planting and late planting during the two cropping season 2013/14 and 2014/15.
Month	Max. Temp (°C)	Min. Temp (°C)	Avg. Max Temp (°C)	Avg. Min. Temp (°C)	Max. RH (%)	Min. RH (%)	Avg.RH (%)
2013-11-01	35.5	12	28.9	12.8	80	46.1	59.3
2013-12-01	32	3	25.9	10.3	68.3	45.1	62.8
2014-01-01	29.5	2	23.4	7	68.3	39.3	52
2014-02-01	29	5	26.5	10.1	67.7	32.3	50.2
2014-03-01	37	11.5	32	15.6	72.5	25.7	49
2014-04-01	44.5	15.5	39.2	21.1	60	29.7	42.9
2014-05-01	45.5	23.5	41.6	28	56	24.3	31.6
2014-11-01	38	12	25.5	8.8	58	40.3	50.8
2014-12-01	32.5	4	25.5	8.8	72.7	37.3	53.8
2015-01-01	30	4.5	24.2	8.3	78.7	47.2	62.7
2015-02-01	35	8	28.5	12.7	68.7	35.3	57.6
2015-03-01	42	6.5	32.7	14.8	72.3	32	46.9
2015-04-01	44	20	39.7	22.1	65	26.7	43.2
2015-05-01	47	21	41.9	25.3	63	32.3	49.3
Max. Temp: Maximum temperature, Min. Temp: minimum temperature, Avg. Min Temp: average minimum temperature, Avg. Max. Temp: average maximum temperature, Max. RH: maximum relative humidity, Min. RH: minimum relative humidity, Av. RH: average relative humidity,
Supplementary Table S3c: Meteorological information of the Islamabad (ISB) for Normal planting and late planting during the two cropping season 2013/14 and 2014/15.
Month	Max. Temp (°C)	Min. Temp (°C)	Avg. Max Temp (°C)	Avg. Min. Temp (°C)	Max. RH (%)	Min. RH (%)	Avg.RH (%)
2013-11-01	26.4	4.5	28.9	12.8	92	57	67.5
2013-12-01	24.5	-1	19.9	3.9	80	44	68.4
2014-01-01	24	-2	18.9	2.3	80.3	38.3	57.5
2014-02-01	24	2.5	19.3	5.5	94	43.7	61.6
2014-03-01	28.2	3	22.4	9	96.3	43	61.9
2014-04-01	39	9.5	29.6	14.4	81.7	35.7	51.2
2014-05-01	41	14	33.5	19.2	95.5	31.3	46.5
2014-11-01	27.5	3.2	25	6.5	78	44.3	55.5
2014-12-01	26.5	0	20.5	2.9	71.7	46	59.5
2015-01-01	22.5	2	18.7	4.4	90	43	62.9
2015-02-01	25	4.5	20.8	8.4	92.7	41.7	62.5
2015-03-01	32	6.5	23	11.3	96	40	64.4
2015-04-01	35	13.5	29.1	17.2	95	40.7	58
2015-05-01	39.5	16.5	35.6	21.1	80.3	29.7	41.2
Max. Temp: Maximum temperature, Min. Temp: minimum temperature, Avg. Min Temp: average minimum temperature, Avg. Max. Temp: average maximum temperature, Max. RH: maximum relative humidity, Min. RH: minimum relative humidity, Av. RH: average relative humidity,

## Sheet: Table S4
Supplementary Table S4: Phenotypic data in synthetic hexaploid wheats in control and heat stress treatments
	Control											Heat stress
Genotype	DH	DM	T/P	PH	SL	S/SP	G/S	SW	GW/S	GY	TKW	DH	DM	T/P	PH	SL	S/SP	G/S	SW	GW/S	GY	TKW
AUS30280	122	154	15	109.5	14.75	13.7407	28.7766	2.7	1.4	9.66667	50.1212	92.3333	123.667	8.33333	70.6667	12.5	15.9	18.5667	1.7	1.08444	6.66667	41
AUS30281	117.333	152.333	11.5	105	12.9333	13.4444	26.4067	3.2	1.135	8.66667	46.0986	91.6667	120.333	8.66667	72.3333	11.8333	19.2211	20.7767	2.00667	1.40444	5.66667	38.6667
AUS30282	112.667	151.667	12.3333	134.5	16.7833	15.1111	52.2511	3.17	1.96	10.6667	39.009	81.3333	113.667	8.33333	91	9.16667	27.6656	37.5522	2.18667	2.12	7.33333	32.3333
AUS30283	121.333	155.667	15	112.5	12.5167	13	25.4867	2.73	0.89	8.66667	39.4074	86.3333	114.333	7.33333	88.8333	9.16667	19.7889	17.6778	1.59333	1.00889	4.66667	45.5
AUS30284	123.333	157.667	12.8333	90.5	12.2	11.5556	35.8444	2.7	1.1	7.33333	41.2078	94.3333	120.333	6.5	87.8333	9.83333	19.9889	21.6556	1.77444	1.85222	5	43
AUS30286	122.333	156.667	14.8333	113.5	14.4833	13.4444	30.7022	2.18	0.6	9.33333	39.011	96	121.667	8.83333	83.3333	10.8333	22.9889	24.3211	2.11667	1.82	7	34
AUS30287	121.667	153.333	16.1667	102	17.2167	13.5556	29.11	2.1	1	9	46.8889	93	117	7.33333	74	10	19.1111	19.8889	1.00333	0.498889	6	30.3333
AUS30288	117	152.667	19.3333	108	16.2167	13.5556	28.4144	2	1.06	10.3333	48.2727	89	115.667	8.66667	73	11.1667	21.1222	18.8989	1.63889	0.973333	5.66667	32.3333
AUS30290	118	155.667	14.6667	117.5	17.2667	14.1111	27.88	3.34	1.35	9.66667	48.8018	90	118.333	8.66667	71.5	10.6667	18.11	15.7756	1.94444	1.13	7.33333	30
AUS30291	117.667	154.667	12.6667	105	17.6	13.5556	25.0478	2.82	1.205	7.66667	49.3333	90	117.667	8.66667	73.8333	11.1667	19.2222	15.9989	1.95556	0.87	5.33333	37.3333
AUS30292	119	154.667	13.1667	114	16.1167	11.7778	29.1667	2.7	1.13	10.3333	36.3922	86.3333	119.333	6.83333	67.6667	9	17.5667	20.7889	1.67111	1.12444	6	35.6667
AUS30293	120	155.667	14.3333	107	14.8667	16.6667	24.9333	3.303	1.075	7.33333	56.3878	91.6667	113.667	7.5	85.1667	10.6667	16.2211	17.6656	1.65111	1.031	5.33333	49.3333
AUS30296	118.667	153.333	16	133	17.4833	13.3333	30.9367	2.33	1.79	10.6667	36.7055	90	116.333	8.16667	87.1667	10.3333	19.2211	22.3311	2.00333	1.67	7	38
AUS30297	118.667	151.333	16.3333	127	16.7333	13	34.5211	2.54	0.91	9.66667	37.0588	82.3333	111.667	8.5	97.3333	10.5	19.8889	25.4556	1.60444	0.803333	6.66667	36
AUS30298	118.333	157	15.1667	130.5	16.8	14.7778	33.6289	2.75	1.49	9.66667	46.0392	82	109	9	94.5	10.1667	21.8889	26.2222	1.79556	1.40889	7.33333	37.3333
AUS30299	117.667	156	16.5	118.5	16.7833	14.7778	24.7111	1.93	0.875	9.66667	38.1919	89.3333	116.667	7.33333	80.5	9	17.0111	16.6778	1.53667	1.02778	7.33333	38.6667
AUS30301	119	155.667	15	118.5	18.8833	13.3333	35.56	1.97	0.91	10	43.3947	84.6667	113	8.33333	82	9.33333	23.1222	31.4533	1.71889	1.75	6.33333	39.3333
AUS30302	116.667	155.333	11.1667	119	17.5167	14.2222	23.8333	1.96	1.17	8.33333	41	88	114.333	6.33333	82.6667	9.5	22.11	28.4433	1.99222	2.33333	5.66667	37
AUS30303	116.333	158	16.5	114.5	15	14.2889	28.4417	2.65	1.25	11	40	81.6667	110.333	6.66667	80.6667	10.8333	20.8889	26.2222	1.61111	0.8	6.66667	38
AUS30305	141	174	17.6667	122	16.4	8.33333	31.3333	NA	NA	8	41.4528	107	128	6	81.3333	9.33333	14	11.3333	1.56333	1.23	6	41.5
AUS30625	113.667	156.667	17	116	18.1667	13.7778	25.0844	1.6	0.65	12	46.7857	91.3333	118	9	76.6667	9.66667	16.9889	18.9889	2.08222	1.86	7.33333	38
AUS30626	111.333	153.667	15.3333	120.5	13.5	13.5556	24.6778	3.85	0.525	10	40.2058	85	120	8.66667	79.8333	8.5	17.8878	15.7767	1.48111	0.93	6.66667	32.6667
AUS30627	123.667	155.333	18.6667	114.5	14.3	11.8889	22.0111	1.74	0.785	10.6667	43.1282	90.6667	120	8	80.1667	8.83333	12.5444	15.2111	1.40889	1.16667	7.66667	37.6667
AUS30628	121.667	155	17.6667	123.5	13.5667	12.7778	22.6778	2.68	1	10	41.1667	94.6667	123.333	7.16667	83.5	9	14.6667	14.7778	1.22111	1.05778	6.33333	36.1333
AUS30629	123.667	158	14.3333	117.5	13.1833	11.6667	26.0444	2.4	0.685	7.66667	35.8333	93.6667	118.667	8	72.8333	6.83333	15.5667	20.7889	1.53	1.19	5.33333	33
AUS30630	122	157.333	14.3333	122	15.6833	14.8889	29.9611	1.97	0.875	8.66667	49.3333	92.6667	116.333	8.33333	60	7.5	17.6556	15.1	1.07556	0.49	5.33333	36.6667
AUS30631	121	155	13.6667	129	20.0667	13	26.9811	1.5	1.035	8.66667	40.6061	90	112	8.33333	84.3333	10.8333	17.2333	19.01	1.43889	1.21667	5.66667	31.3333
AUS30632	118.667	154.667	15	135.333	19.4	13.5556	33.6778	1.6	1.235	10.6667	43.2727	94	118	9.66667	77.3333	10.8333	19.2222	19.8889	1.17889	0.81	6.66667	40.3333
AUS30633	117.667	152	18.3333	126.5	13.5333	12.8889	31.1956	2.29	1.195	10.6667	50.2963	85.3333	116.667	6.16667	78	9.66667	15.1	11.2111	1.78222	1.11333	7.33333	36.6667
AUS30635	117.333	159.333	17.3333	120.5	14.0333	13.1111	24.2211	2.51	1.15	10.3333	57.1884	90.3333	116.333	7.5	78.5	9.5	15.1111	18.5556	1.46889	1.29	6.33333	48
AUS30636	118	157.333	18.3333	118.5	15.2333	12.4444	27.0844	1.76	1.275	11.3333	40.75	82	114.333	7	86.5	10.5	19.5544	21.6633	2.14222	1.82333	6.33333	48.3333
AUS30637	115.333	157	14.6667	115	17.05	14	30.5911	2.95	1.4	10.6667	52	82	110.667	8.16667	89.3333	9.66667	16.6778	24.01	1.91778	2.03333	6.66667	40.6667
AUS30641	118.333	155.667	13.3333	127	18.3167	14.8889	37.7033	3.42	1.515	11	48.8935	88.6667	115.333	7	77	8.66667	18.6656	27.5533	1.94667	1.56	6.66667	36.3333
AUS30642	115.333	154	15	136	19.0833	14.1111	34.2322	2.94	1.615	10.6667	44.5729	88.6667	117.333	8.66667	76.8333	10.3333	16.6656	12.1089	1.70889	0.77	7.66667	36.6667
AUS30643	116.667	152	15.3333	114	18.75	14.2222	30.6278	2.33	0.97	9	52.7911	82.6667	111	9.5	78.6667	10	20.0111	19.1222	1.96	1.27333	5.66667	39.3333
AUS30644	117	153.333	15	120.5	13.85	12.4444	28.5256	2.1	1.38	9.66667	33.5082	84.6667	111	10.5	90.1667	10.6667	18.6667	25.7767	1.78222	1.69667	6.33333	36.5
AUS30645	112.667	151.667	14.3333	119	16.6333	13.6667	29.3311	1.6	1.06	8.33333	38.9778	81.6667	114.667	7.16667	74	9.66667	25.1111	38.7767	1.89556	1.00667	5.66667	31.6667
AUS30647	118.333	156.333	10.3333	127.5	11.6833	14.6667	29.3022	2.91	1.195	8.66667	49.5699	84	114	6.5	96.3333	10	19.5556	25.6656	1.84222	1.20667	5.33333	44.6667
AUS30648	119.333	154.667	10.6667	112.5	17.0667	14.1111	32.1667	3.33	1.79667	11.6667	46.4062	85	115.667	9.5	82	11.3333	21.1222	24.1222	1.82444	1.5	8	34.6667
AUS30649	119.333	156.333	15.3333	128.5	17.7833	12.7778	32.6656	2.87	1.21	8.66667	60.3475	86	116.667	7.33333	82.3333	11	20.1	30.7656	2.53778	1.63333	5.66667	29.3333
AUS30651	121.667	159.667	16.6667	124.5	18.9833	13.8889	22.1467	1.74	1.265	9	55.427	90	119	8	83.3333	9.5	19.4556	24.5656	2.10556	1.39333	4.66667	36
AUS30652	117.667	154.333	15.6667	118.5	19.35	15.2222	25.71	2.38	1.265	10.3333	49.5238	90	119.333	8.5	82	10.5	14.8889	15	1.51667	0.732222	5.66667	42
AUS30655	119.667	158.333	13	116.5	16.3833	13.1111	24.6278	1.72	1.253	12.3333	48.5	89.6667	115.667	6.16667	82.6667	9.16667	18.4556	22.12	1.58778	1.66	7	29.3333
AUS30656	116.333	157	11.1667	123	14.5167	14.2222	43.3311	2.62	1.855	10.6667	45.5	92.6667	116.667	9	68.6667	8	17.7778	22.7778	1.18	0.716667	6.66667	34
AUS30658	118.333	163.667	11	107	11	15.2	31.8917	2.44	1.115	9.33333	46.8605	84.3333	121.667	5.83333	69.6667	9	22	24.0111	1.82	1.36333	5.33333	38.3333
AUS30659	121.667	156.667	14.5	111	19.2	16	29.7767	2.75	1.11	10.6667	18.75	96	119	6.83333	79.6667	11.1667	23.5556	19.4433	2.07778	1.05	6.66667	31
AUS30660	156	177	9.33333	48	8.23333	8.66667	26	NA	NA	8	38.3509	109	148	4.33333	56.3333	8	15.3333	52.3333	1.84	4.65	5	36
AUS30661	120.333	156.667	13.8333	115.5	14.5833	17.7778	33.4056	3.38	1.08	11	46.9123	91.6667	113	6.66667	73.6667	10.6667	17.8889	27.3333	2.21222	1.88333	7.33333	34.3333
AUS30668	116.333	155	17.6667	119	18.3667	12.2222	20.3689	1.84	0.765	9.66667	42.871	81	109.333	7.83333	76.5	9.5	21.3322	19.7756	1.73333	1.13333	5.66667	34
AUS30669	121	155.333	12.5	115	16.4833	16.4444	37.3	2.71	1.255	8.66667	36	87	117.333	7.5	71.8333	9.33333	18.4556	16.9889	1.69667	1.01333	5	35
AUS30672	117.667	162.667	13	107.5	13	16.9111	34.9967	2.3	1.06	7	39.4035	92	122.667	9	79.5	9.66667	20.7667	17.9878	1.22778	0.82	4.33333	30.3333
AUS33376	121.667	159.667	12	95.5	10.8333	15.6667	36.7022	2.7	1.5	8	48.5417	86	118.667	8	80.1667	8.66667	17.3444	23.2322	1.30222	0.976667	5.66667	34
AUS33380	153	180	17.3333	101	18.7667	5.66667	23	NA	NA	10	37.0741	108	141	4	70	8	15	14	1.22333	1.56	6	31.3333
AUS33381	119	155.667	14	101	17.3833	10.8889	22.3811	1.77	0.94	11	57.3448	88.6667	116.333	7.5	79.5	9.83333	19.4556	20.1211	1.62333	1.06333	6	34
AUS33383	111	149	14.5	134.5	20.75	16.3333	30.1556	3.4	1.825	9.66667	51.9368	81.6667	110.667	8	99	12.5	23.7778	23.4444	2.15	1.00667	6.33333	41.6667
AUS33384	111.667	148.667	15.5	140	21.05	14	27.7111	2.64	1.565	9.66667	58.375	79	118	10.3333	79.6667	8	25.9	28.1222	1.78667	1.76556	6	42
AUS33386	147	178	13.6667	95	16.6667	6.66667	34.6667	NA	NA	7	34.2857	108	138	5.33333	73.6667	10	17.3333	20.3333	1.4	2.67	4	33.6667
AUS33387	115.667	156.667	12.8333	112.5	17.0167	15	24.2211	1.92	0.935	7	51.9167	92.6667	121.333	5	65.8333	8.83333	20.5544	18.1089	1.36222	0.836667	4.66667	35.3333
AUS33388	119.667	150.333	12	111.5	17.3	14.1111	24.4222	2.85	1.245	9.66667	56.0667	91.6667	119.667	6.83333	80.6667	9.5	25.1	19.5444	1.85	1.08889	5.66667	36.6667
AUS33389	117	152.333	19.5	127	13.4833	15.7778	23.5	2.27	1.325	9.66667	47.977	84	112.333	7.83333	77.3333	10	20.4556	22.4556	1.91111	1.28667	6.66667	42
AUS33391	120.333	155	15	111.5	18.75	14	25.8989	3.29	1.645	11	44.4821	91.3333	119.333	8.16667	91.1667	13.5	24.1111	28.4433	2.38556	2.05	7	37.6667
AUS33393	113	152	14.6667	129.5	18.8	14.6667	28.9733	1.97	0.9415	8.66667	39.7163	90.6667	114	8.33333	84.6667	9.33333	11.2111	13.6533	1.84111	0.683333	6	37
AUS33394	114.667	151	16.8333	138	14.2667	15.4444	38.2211	2.56	1.7	9.66667	37.6078	78	118	6.83333	71.3333	9.33333	26.2333	33.0111	1.70222	2.13	5.33333	31
AUS33395	110	146.333	16.5	120	20.2	15.3333	22.5667	2.21	0.85	9.66667	33.7236	94.3333	119.333	7.83333	81.1667	11	23.3333	16.5556	1.66	0.966667	6.66667	28.5
AUS33396	120.667	159.667	15.3333	119	17.8333	14.2222	26.5944	1.94	0.865	8.66667	34.0351	78.6667	104	8.5	83.6667	9.5	19.7667	26.3333	1.78222	1.64333	5.66667	25.3333
AUS33397	112.667	153	14.6667	127.5	18.1167	16.1111	31.3333	2.8	1.475	7.66667	45.25	89.3333	107	6.5	81.1667	8.83333	23.3333	16.6667	1.88667	0.733333	4.33333	32.3333
AUS33398	116.333	153.667	16.1667	129.5	16.1333	15.6667	28.9778	3.27	1.575	10.3333	46.7764	85.6667	105.333	6.66667	84.5	10.3333	23.2333	29.2444	1.80111	1.34333	6	35.6667
AUS33399	117.667	155.667	15.5	118.5	15.7	14.6667	41.9333	2.23	1.595	8.33333	39.9067	77.6667	112.667	8.33333	76.5	9.66667	21.0111	31.3444	1.81333	1.47333	5	34
AUS33400	112.667	154.667	18.5	123.5	17.2	13.7778	27.0433	1.75	0.61	9.66667	50.3619	82.3333	117.5	7	81	9	26.6667	24.1111	1.55222	1.01	5.33333	29.3333
AUS33402	102.333	153.333	16.3333	110.5	18.7833	17.3333	31.7878	2.19	1.085	10.6667	49.8833	94	120	7.5	72.3333	7.83333	22.6667	29.5544	1.58667	1.79	6.33333	36.3333
AUS33403	115	157.667	13.1667	123.5	15.2	12.8889	21.1667	2.13	1.66	10.3333	40.2941	77.3333	98.6667	8.16667	80.5	8.83333	21.6667	26.8889	2.06444	1.29333	6.33333	29.6667
AUS33404	109	153.667	13	122	15.4667	14.5556	32.3444	2.16	1.515	7.66667	51.7	79.6667	111.333	7.33333	83.8333	10.1667	26.3333	36.3333	1.99	2.17667	4.33333	44
AUS33406	107.333	149	13.6667	111.5	15.9833	15.7778	31.4878	2.4	1.9	10.6667	53.037	82	106	8.83333	89.1667	8.33333	25.0111	32.2333	2.49444	2.34333	7	38.6667
AUS33407	113.667	149.667	13.5	122.5	14.5333	16.4444	35.5289	3.05	2.395	10.6667	56.5333	80.6667	103.333	7	91.6667	7.16667	21.4433	30.6656	1.94222	2.01667	6.66667	34.5
AUS33409	111	147.333	14.3333	108.5	17.8333	19.1111	38.6289	2.8	1.8	9.33333	36.5	82.6667	107.333	9	84.3333	10.1667	21.2222	28.7778	1.72111	1.48	5.33333	26
AUS33411	143	165	10.3333	100	19.6667	8.33333	44.6667	NA	NA	12	50.601	102	126	7.33333	58.6667	8.66667	NA	NA	1.59333	NA	7	37.3333
AUS33412	126.333	150.667	14.5	124	14.5833	13.5556	36.4	3.81	2.11	11	51.1049	81	106.333	7.83333	91.5	8.5	23.8878	30.9767	1.89444	1.29667	7	39.3333
AUS33414	110	148.333	12.1667	129	15.4167	15.8889	49.64	3.4	2.265	11	52.3537	80.6667	102	7.66667	79.1667	8.66667	22.1222	26.9	2.29556	1.57333	8	35.6667
AUS33415	114.333	138.667	13.8333	111	14.5	15.3333	39.1222	2.61	1.625	8.33333	54.1636	77	98.6667	6.83333	75.8333	9.83333	25.8878	28.8878	2.26778	1.63667	5.33333	40.3333
AUS33416	110.667	146.333	15	113	14.0833	15.4444	34.6778	2.82	1.74	9	68.3077	78.6667	106.667	7.16667	89.5	8.66667	23.4433	26.11	1.73667	1.22333	6.33333	32
AUS33417	124	173	12.3333	132	24.5	9.33333	22.3333	NA	NA	9	32.6667	108	148	3.66667	81.3333	7.33333	11.6667	15.3333	1.36667	1.95	6	31.3333
AUS33419	113	149	10.8333	107.5	15.5833	13.3333	25.85	2.5	1.01	7.66667	63.7953	85.6667	112.667	5.83333	76	10.3333	25.5556	28.2211	1.83333	1.27667	4.66667	40.6667
AUS33421	111	152	12.6667	133	14.75	13.8444	35.8483	2.3	1.955	10	37.197	77.3333	103.333	7.5	100	8.83333	25.0111	35.3433	2.13	2.35333	6.33333	32.5
AUS33422	113.333	151	11.3333	123	17.75	13.5	28.1083	NA	0.875	10	53.6271	81.6667	108	7	93	10.8333	15.3333	24.665	1.08	1.195	6	37.6667
AUS33423	116	154	13.5	108	13.75	11.7778	23.1589	2.24	1	10	42.7967	86.3333	112	8.16667	79.6667	9.16667	19.0111	21.5656	2.14	1.68333	6.33333	38.3333
AUS33424	121.333	151	12	112.5	16.75	15.7778	33	2.72	1.44	9	44.3333	98	113.667	6.5	74.1667	11.6667	27.6778	30.3444	1.73444	7.13333	5.66667	36.3333
AUS34230	113	148.333	16	94	15.5833	15	27.4178	2.45	1.565	9.66667	54	81.6667	108	11	77.3333	10.8333	23.2222	28	1.92333	1.86333	7	30
AUS34231	147	185	16.3333	93	18.3	4.66667	38.3333	NA	NA	11	46.6957	111	142	7.33333	77.6667	9.66667	12.6667	11	1.49	1.11	8	35
AUS34232	113.667	147.333	10.8333	100	11.7167	11.1111	25.2222	2.32	1.195	9	55.4133	88.6667	114	7.5	72.6667	9.5	21.6656	20.6656	2.21333	1.25667	5.33333	39
AUS34234	118.333	148.667	11.1667	78	12.0833	13.6667	25.97	2.58	1.28	9	43.815	95	120.333	6.33333	67	9.5	20.2233	23.4444	1.53444	1.37667	5.66667	27.3333
AUS34235	112.333	145.333	10.6667	84.5	16	12.5556	26.0444	2.5	1.16	6.66667	55	93.3333	117.667	6.5	64.3333	7.83333	18.7889	19.1222	1.515	0.483333	4	31.6667
AUS34236	114.667	146	11.3333	100	17.2167	14.8889	27.2567	2.5	1.5	10	37.8462	86.3333	106	7.83333	66.6667	10.1667	18.3444	12.6756	1.78889	0.933333	6.33333	34.6667
AUS34237	116.333	152.333	11.3333	122	15.9333	13.5556	31.0767	3.8	1.765	8.66667	48.2667	83	109.333	7.5	86.8333	9.83333	28	29.9889	2.35333	1.33667	5.66667	41.3333
AUS34239	114	150.667	15.1667	114.5	12.3	14.7222	28.96	2.2	1.46	9.66667	48.3415	83	106.667	8.83333	87.8333	11.6667	19.1111	19.1111	1.76778	1.09667	6	34.6667
AUS34241	115	150	13.6667	121.5	15.4333	15.4444	19.2333	2.48	1.01	8	50.8837	82.3333	112.667	8	87	11.3333	22.2222	19	1.70889	0.946667	5	33.3333
AUS34242	116.333	151.333	13.5	122	17.05	12.3333	21.6733	1.7	0.9	10	53.8571	83	108	7.16667	101.167	10.6667	18.7778	16.5533	1.61556	1.24	6	29.3333
AUS34243	117	152.333	11.8333	106	14.75	13.2222	32.85	1.9	1.475	9	50.5185	82	106.667	8.33333	92.3333	10.5	22.4433	33.7744	2.00111	1.93333	6	40
AUS34244	119	153.333	14.5	120	17.25	17	35.94	2.71	1.845	9.33333	61	85.3333	111.333	6.66667	90	10.5	21.3444	26.0222	2.18667	1.30667	6.33333	36
AUS34245	116.667	153.333	12.5	110.5	16.5833	12.6667	21.8144	3.9	1.42	9.33333	42	89.3333	114	8.16667	71.3333	9.5	15.7767	16.6644	1.40467	1.09	6	36.6667
AUS34246	118	153	11.5	115.5	13.25	13.6667	20.15	2.9	1.31	8.33333	49.6019	86	110.333	6.66667	76.8333	8.33333	20.1222	22.5778	1.84	1.38667	5.33333	38
AUS34247	118.333	156.333	13.3333	114	13.665	15.9111	25.255	3.34	1.27	9.33333	59.125	88.6667	108.667	9	74.1667	10.5	27.0111	23.7878	2.23	1.20333	6	37
AUS34248	121	150.333	14.8333	93	13.3	14.6667	21.5167	3.3	1.27	9	54	90	108.667	10.8333	75.1667	7.66667	17.2211	22.4411	2.1	1.44	6.66667	37
AUS34249	117.667	154.667	16.6667	108.5	15.7333	13	26.5544	2.8	1.105	10.3333	46.4848	90.3333	110	8.33333	84.1667	10.8333	18.5667	12.6778	1.15222	0.393333	7	37
AUS34251	106.333	155	14.8333	108.5	14.1667	17.3333	22.1578	3.4	1.23	10	35.7241	92	113.667	8.16667	76	9	21.11	17.7744	1.83111	1.02	6.33333	34
AUS34252	119	156.667	9.33333	136	14.3	15.1111	16.8867	3.01	0.865	8	42	90.6667	107.333	8.33333	87.3333	9.83333	19.1111	21.6667	1.76	1.16667	5	33
AUS34253	119.333	156.333	15.6667	89.5	13.1833	14.3333	21.8878	3.02	1.115	8.66667	46.3509	89.6667	114	6.5	72	8.16667	18.7778	25.3322	2.13333	1.65333	5.66667	37.3333
AUS34254	119	155	14.5	106	14.0833	16.6667	25.9622	2.7	1.42	8	42.6667	88.3333	112	7.33333	80.5	8.83333	20.6778	24.2333	2.18444	1.76333	5.66667	38.3333
AUS34255	118.333	158	15	102	11.165	13.4444	23.1667	2.56	1.235	8	63	92	115.667	4.33333	58.6667	6	17.1111	17.4444	1.54333	0.913333	5.33333	18
AUS34257	147	174	17.3333	90	14.1	4.66667	57.3333	NA	NA	7	60.1961	115	142	6.33333	66.6667	6.33333	13.3333	18	1.39	1.74	4	32
AUS34259	157	178	13.3333	27	16.9	5	23.6667	NA	NA	NA	43.8462	114	142	4.66667	70.3333	10.3333	22	18	2.17667	0.93	NA	42.3333
AUS34260	120	157	15	101	12.6833	13.1111	30.4056	2.65	1.285	NA	53.6	92.3333	115.333	4.83333	63.1667	7	13	16.8889	1.65333	1.32	NA	39.5
AUS34262	130	158.5	15.3333	19	2.75	11.3333	19.35	1.32	0.405	NA	55.3498	91.5	121.5	3.66667	63	9	22.665	22.165	1.93	1.47	NA	40
AUS34264	124.5	159	14.8333	129.5	16.75	14	26.4983	NA	0.665	NA	53	88.5	116.5	7.5	81.8333	9.33333	19.3333	25.665	2.51667	2.78	NA	42.5
AUS34265	142	178	16	100	17.6	5.33333	13.6667	NA	NA	NA	47.7829	103	130	5.33333	80.6667	9.66667	18	36	3.07	4.14	NA	40
AUS34266	151	176	7.33333	74	14	3.66667	17	NA	NA	NA	45.9365	104	130	5	86	10	18.6667	17.3333	1.74333	1.77	NA	34.3333
AUS34268	111.333	150.333	12	115.5	16.8167	14.7778	31.8511	2.01	1.235	NA	51.1826	84.6667	110.667	10.1667	84.6667	9.83333	20.3322	21.1078	1.99556	1.28667	NA	32.6667
AUS34270	117	154	15.1667	121.5	14.9	13.7778	28	2.5	1.39833	NA	49.9841	88	112	8	77.1667	10.1667	17.7778	20.8889	1.67889	1.31333	NA	34.8333
AUS34271	118.333	155.333	10.6667	102.5	12.6833	12.3333	23.6333	1.41	0.985	NA	39.6667	82.6667	102.667	6.83333	76.6667	9	17.5667	18.0222	1.71889	1.30333	NA	35.3333
AUS34272	112.667	152.333	10.6667	97	12.9	13.1111	23.6778	2.6	1.21833	NA	47.5751	85.6667	110.667	8	76.1667	8.33333	18	31.5556	1.54667	1.75333	NA	34
AUS34273	121	156.333	9.5	116	15.1	12.6667	30.3311	2.31	1.815	NA	48	86.6667	108	7.83333	82.3333	9	16.8889	21.8878	1.51222	1.26667	NA	35.6667
AUS34274	119.667	152.333	10.8333	114	16.3667	13.3333	25.2067	2.9	1.405	NA	63.5	89	116	8	86.8333	9	18.4433	21.9878	1.86222	1.50333	NA	34
AUS34275	121.333	152.667	14	132.5	18.4167	13.2222	32.0722	3.16	1.37	NA	47.1183	94	129	9	87.1667	10.6667	20.2222	17.1111	1.32556	0.98	NA	35
AUS34276	123.333	155	10.5	116.5	13.22	19.5	26.51	2.5	1.04	NA	37.2	92.6667	116.333	6	71.6667	8.83333	21.9989	17.7744	1.61333	1.20667	NA	28.5
AUS34277	123.333	157.333	10.1667	123.5	14.33	18.1667	22.9833	2.09	1.155	NA	37.5185	92.6667	116	5.5	79.8333	7.5	12.6778	15.7889	0.912222	0.593333	NA	35.8667
AUS34278	123	154.333	12.1667	116	13.9	14	31.11	2.51	1.23	NA	54.5	89.3333	116.667	7.83333	83.6667	10.3333	18.4556	25.5667	1.83111	1.95333	NA	33.7
AUS34279	120.333	149.667	11.5	115	14.0167	13.5556	32.3989	2.76	1.885	NA	51.8667	97.6667	123	5.33333	71.1667	8.83333	21.6656	22.8656	1.54	0.623333	NA	36.3333
AUS34280	119	151.333	7.83333	114	17.3167	13.6667	25.7744	2.17	1.43	NA	45.5	92.3333	121.333	6.5	82.8333	9.33333	27.6667	30.5544	2.01889	1.86	NA	37.3333
AUS34405	115	155.333	14.3333	125	15.222	13.8333	28.01	2.42	1.31	NA	42	92	117.333	6.16667	66	10.8333	21.8878	23.6633	1.655	0.563333	NA	36.6667
AUS34406	117	157.667	12.8333	110.5	15.7333	15.4444	29.1956	2.5	1.06	NA	47.1333	87.6667	113.333	10	95	10.5	26.11	31.9967	1.92111	2.04667	NA	30
AUS34407	115	160	13	131.5	13.94	19.3333	32.1217	2.98	1.68	NA	44.3333	86	110.667	6.66667	89.8333	9.16667	25.3333	23.4433	1.86111	1.45333	NA	37
AUS34408	118.333	158.667	12.6667	131.5	14.665	17	25.2333	2.7	1.315	NA	34.381	82.3333	106.667	6.33333	89.1667	9	21.4556	30.2333	1.82333	1.61333	NA	46.3333
AUS34409	118.333	156.333	8	108	13.8333	13.5556	28.7833	2.4	1.11	NA	48.44	89.3333	113.333	8.66667	95.8333	10.5	22.4556	30.0089	1.97111	1.71667	NA	33.5
AUS34410	125	158	15.3333	61	12.9	8.16667	27.665	2.52	1.01	NA	39	92.5	121.5	5.66667	92	11.6667	19.9983	25.8317	2.07333	2.265	NA	35.6667
AUS34412	118.667	156	12.3333	122.5	14.9167	14.5556	29.0367	2.28	1.305	NA	45.7143	87	112.667	7.33333	82.1667	9.5	19.0111	25.1211	2.07778	0.996667	NA	34.6667
AUS34414	118.667	155.333	10	130	14.44	16.5	17.7933	1.85	1.05	NA	51.0208	90	114	7.16667	78.6667	9.16667	17.3333	11.1111	1.46222	0.623333	NA	32.6667
AUS34415	118.667	157	11.8333	130	14.495	18.5	16.8	1.53	0.775	NA	45	88.6667	113	8.33333	82.8333	10	16.7778	21.2333	1.83889	1.58333	NA	39.3333
AUS34416	120.667	157.667	11.1667	107.5	14.45	12.4444	27.8256	2.4	1.225	NA	52.2553	89.3333	112	7	92.5	10.8333	18.9989	30.4422	2.25667	1.93667	NA	40.6667
AUS34417	119	157.333	10	114	14.6167	14.1111	25.8956	2.07	1.255	NA	52.7377	88.3333	112	6.83333	81.8333	9.16667	19.8889	22.1089	1.73778	1.47	NA	46.3333
AUS34418	118	158	10.3333	116.5	14.611	17.1667	25.9983	1.68	1.235	NA	53.0417	90	112	8.5	74	9.16667	20.6667	18.1111	1.93889	1.86333	NA	38.6667
AUS34419	118.333	155.333	10.8333	104	14.2667	13.3333	21.9256	1.44	1.05	NA	52.379	91.3333	114.667	5.5	75.6667	7	22.2222	25.3322	1.56667	1.53667	NA	28.3333
AUS34420	116.333	155.667	13.3333	118.5	16.7	13.1111	24.6111	2.31	1.27	NA	50.9502	90.6667	113.333	6.33333	85.3333	9	17.5544	19.2211	1.75556	1.37333	NA	33
AUS34421	116.333	158.333	13.3333	114	10.7167	12.5556	25.1956	2.2	1.275	NA	48.6667	91.3333	119.333	7.16667	72.8333	11.5	22.0111	23.1222	1.62889	1.24667	NA	36.6667
AUS34422	119	157	11.8333	111	16.7667	12.3333	16.9733	1.75	0.84	NA	45.3131	91.3333	116.667	7.66667	89.1667	9.66667	20.6667	21.1111	2.21667	1.47667	NA	42.6667
AUS34423	119	155.333	9.5	94.5	15.35	12	17.6	2.52	1.51	NA	54.7879	91.3333	117	7.33333	77.6667	9.66667	20	18.8889	2.19556	1.11667	NA	37.3333
AUS34424	120.667	157	12.5	84	13.8333	11.6667	21.2778	2.54	1.22	NA	45.5	82.6667	116.667	7.66667	73.6667	9	19.7767	18.4433	2.44	1.26667	NA	26
AUS34425	116.333	154.333	15.8333	112.5	14.6167	12.7778	27.5544	2.65	1.445	NA	46	87.3333	114	6.5	84.1667	10.6667	18.6667	24	2.23556	2.18667	NA	36
AUS34426	119.667	156.667	13.5	92.8333	16	11.3333	26.2878	1.9	1.165	NA	41.3333	88	112.667	7	88.8333	9.66667	16.1222	19.5667	1.99333	1.72333	NA	36.3333
AUS34427	119	157.667	12.6667	128	16.22	17.8333	26	1.78	1.105	NA	46.2059	96.3333	120	7.16667	89.5	10.3333	21.7889	21.2333	2.04333	0.996667	NA	37.5
AUS34428	140	186	8.33333	115	15.33	NA	NA	NA	NA	NA	59.4198	103	130	8.33333	83	10.3333	18	32.6667	2.55333	3.93	NA	34
AUS34429	139	178	15.3333	117	21.0333	9.33333	47.3333	NA	NA	NA	43.1984	103	128	5.66667	83.6667	7.33333	20.6667	27.3333	3.05333	2.94	NA	31.5
AUS34430	142	177	14.6667	100	19.4333	8.66667	22.6667	NA	NA	NA	45.6042	105	130	6.33333	102.667	9.66667	15	17	0.983333	1.56	NA	38.6667
AUS34431	119.667	158	13.5	104	15.2	14.2222	36.7778	2.73	2.305	NA	51.9683	92.6667	117.333	6.83333	74.3333	9	21.4433	24.5544	1.80556	1.09	NA	43
AUS34432	125.5	161	10.3333	116	19.7333	11.3333	35.85	2.99	0.85	NA	51.1979	98.5	127	8	65.6667	7.66667	17.35	13.0167	1.55167	1.01	NA	47
AUS34433	125	159.5	13.3333	111	17.5	11.1667	31.3317	3.13	0.985	NA	NA	93.5	115.5	5	86	8	15	20.1667	1.84667	1.85	NA	40
AUS34434	123	160.5	10.6667	96	25.1667	13	22.0167	2.1	0.64	NA	41.1111	92	114	5.33333	78.3333	8.33333	19.165	15.8317	1.67833	1.09	NA	31
AUS34435	115	154.667	13.3333	115.5	13.4	13.7778	18.5667	2.02	1.02	NA	52.563	88.6667	113.667	7.83333	82.3333	8.5	20.7889	16.5667	1.90556	0.923333	NA	38
AUS34436	117	159.667	12	124.5	16.775	17.3333	20.61	1.17	1.16	NA	53.8095	89.3333	112	7	83.8333	7.83333	18	22.8889	2.03333	1.68667	NA	39.6667
AUS34437	118.667	154.333	13.3333	114	17.3667	13.8889	25.9322	3.52	1.815	NA	48.6667	88.6667	111	6.83333	79.6667	9.83333	18.1222	24.6778	2.05778	1.94333	NA	37.6667
AUS34438	123.5	160	15	100	16.5833	13.3333	17.6667	NA	0.4515	NA	54.355	92	117.5	5.5	74.5	8.33333	15.6667	21.8333	1.36667	2.035	NA	35.3333
AUS34439	115.667	154	15.8333	106.5	18	14.3333	23.9444	3.55	1.28	NA	52.9896	84.3333	110.333	5	74.3333	10	20.8878	19.3322	2.15778	1.13667	NA	36.6667
AUS34440	117.667	154	15.6667	122	15.8333	14.2222	39.0433	2.47	2.06	NA	54.3191	86.3333	111	6	85.8333	11	21.5556	35.3333	2.24444	2.38667	NA	40
AUS34441	147	174	10.3333	93	17.1	7	31.6667	NA	NA	NA	50.6038	105	132	3.66667	69.3333	8	13	13	1.68667	1.47	NA	47
AUS34442	126	161.5	17.3333	107	23.0667	12.5	24	3.77	0.975	NA	47.8222	91.5	119.5	5	96	7.66667	17.3317	24.3317	2.23	2.395	NA	33.6667
AUS34443	117.333	155.333	15.8333	93.5	16.6833	15.5556	23.4056	2.27	1.135	NA	55.6977	87.3333	112.667	7.16667	61.5	10.1667	21.9	24.4556	1.92889	1.38333	NA	37.5
AUS34444	127	164	10.6667	113	18.7667	12.3333	31.85	1.71	0.415	NA	59.1489	89	121.5	6.66667	91.3333	11	21	22.1667	2.00167	1.655	NA	40
AUS34445	125.5	165.5	12.3333	100	21.3	10.8333	21	2.19	0.725	NA	44.2074	96.5	121.5	4.66667	70.6667	9.66667	18.8333	17.1667	2.105	1.18	NA	37.6667
AUS34446	118.333	155.333	15.6667	91.5	14.05	12.4444	24.5	0.72	1.255	NA	42.4444	86	110.333	5.83333	70.8333	8.5	17.5544	18.2211	1.77111	1.22	NA	38
AUS34447	119	153	10.3333	104.5	14.3167	14.6667	25.3667	3.14	1.625	NA	54.2686	85.3333	109.333	5.83333	92.8333	11.5	21.3333	27.7778	2.28778	2.13667	NA	42.3333
AUS34448	118.333	151.667	15.5	99.5	15.4167	15.8889	33.4067	3.04	1.67	NA	43.2692	82	108.667	8.5	74	9.33333	19.5556	23.8889	1.96222	1.76	NA	36.5
AUS34449	115.667	155.333	15.3333	130	16.8833	14.8333	31.9	NA	0.8	NA	49.6667	90.3333	115.667	8	94.3333	8.83333	20.9989	24.11	1.59111	1.36333	NA	33.5
AUS34450	120.667	157.667	11.1667	97	16.4833	18	31.7767	NA	0.9	NA	36.3696	89.3333	116.667	6.66667	80.6667	8.83333	21.0111	23.6778	2.21444	1.57333	NA	34.5
AUS34451	118	150.667	13.5	92.5	14	14	22.4433	NA	0.52	NA	47.1	80.3333	108.333	5.5	81.5	9.33333	18.9	22.5667	2.03667	1.54333	NA	35.5
AUS34452	120.333	154	16.1667	112.5	15.55	13.3333	21	NA	0.525	NA	48.7556	79.3333	113	8.16667	89.6667	9	19.7778	22.8889	1.90444	1.54667	NA	39.5
AUS34453	119	157	11	98.5	16.2333	13	37.2333	NA	0.72	NA	54.3333	76.6667	103.667	7.16667	68.3333	9.33333	18.7889	22.6778	1.57	1.55333	NA	40.5
AUS34454	119	157.333	12	97	16.4833	12.8333	28.6667	NA	0.98	NA	NA	90.3333	116.667	8.33333	81.6667	9.33333	23.7778	26.4444	2.48778	1.69333	NA	NA
AUS34455	147	185	13.6667	96	21.4667	8.33333	21.6667	NA	NA	NA	NA	110	136	5.33333	77.6667	8.66667	14.6667	18.6667	1.65	2.13	NA	NA
AUS34456	118	155	17.3333	115	17.8333	15	20.9433	NA	NA	NA	NA	89.6667	74.6667	9.5	75	9.5	20.3333	15.7778	2.14667	1.12	NA	NA
AUS34457	107	146	11.6667	110	11	23	27.8867	NA	0.535	NA	NA	90.3333	108	7	62	9	17.11	16.6656	1.88667	0.703333	NA	NA
AUS34458	104	145	14.6667	90	11	22.3333	59.6667	NA	1.2	NA	NA	77.3333	91	7.33333	70.5	7.66667	19.7889	30.9	1.61889	1.66	NA	NA
AUS34459	106	143	15.6667	135	13	19.6667	30.5767	NA	0.87	NA	NA	78.3333	95	7.66667	83	8.5	17.9	24.1211	1.69778	1.43	NA	NA

## Sheet: Table S5
Supplementary Table S5: Genotypic data as HapMap file of all synthetic hexaploid wheats used in this study
rs#	alleles	chrom	pos	strand	assembly#	center	protLSID	assayLSID	panelLSID	QCcode	AUS30280	AUS30282	AUS30283	AUS30284	AUS30286	AUS30287	AUS30288	AUS30290	AUS30291	AUS30296	AUS30297	AUS30298	AUS30299	AUS30302	AUS30303	AUS30305	AUS30625	AUS30627	AUS30628	AUS30629	AUS30630	AUS30631	AUS30632	AUS30633	AUS30635	AUS30636	AUS30637	AUS30641	AUS30642	AUS30643	AUS30644	AUS30645	AUS30647	AUS30648	AUS30649	AUS30651	AUS30652	AUS30655	AUS30656
AX-94493709	G/A	1A	1174865	+	NA	NA	NA	NA	NA	NA	G	G	G	G	G	G	G	G	G	G	A	G	G	A	G	G	G	G	G	G	G	G	G	G	G	G	G	G	G	G	G	G	G	G	G	G	G	G	A
AX-110012566	T/C	1A	1190829	+	NA	NA	NA	NA	NA	NA	T	T	T	T	T	T	T	T	T	T	C	T	T	C	T	T	T	T	T	T	T	T	T	T	T	T	T	T	T	T	T	T	T	T	T	T	T	T	C
AX-86179001	A/G	1A	1211885	+	NA	NA	NA	NA	NA	NA	A	G	G	A	A	A	A	A	A	A	G	A	A	G	A	A	A	G	A	A	A	A	A	A	A	A	A	A	A	A	N	G	G	A	A	A	A	A	A
AX-86179145	A/G	1A	1211885	+	NA	NA	NA	NA	NA	NA	A	G	G	A	A	A	A	A	A	A	G	A	A	G	A	A	A	G	A	A	A	A	A	A	A	A	A	A	A	A	A	G	G	A	A	A	A	A	A
AX-179560324	G/A	1A	1234396	+	NA	NA	NA	NA	NA	NA	G	G	G	G	G	G	G	G	G	G	A	G	G	A	G	G	G	G	G	G	G	G	G	G	G	G	G	G	G	G	G	G	G	G	G	G	G	G	G
AX-94745699	C/T	1A	1235969	+	NA	NA	NA	NA	NA	NA	C	C	C	C	C	C	C	C	C	C	C	C	C	C	C	C	C	C	C	C	C	C	T	C	C	C	C	C	C	C	C	C	T	C	C	C	C	C	N
AX-111687224	A/G	1A	1339768	+	NA	NA	NA	NA	NA	NA	A	G	G	A	A	A	A	A	A	A	G	A	A	G	A	A	A	G	G	G	G	G	A	A	G	A	A	A	A	A	A	G	G	A	A	A	A	A	A
AX-95652482	A/G	1A	1339768	+	NA	NA	NA	NA	NA	NA	A	G	G	A	A	A	A	A	A	A	G	A	A	G	A	A	A	G	G	G	G	G	A	A	G	A	A	A	A	A	A	G	G	A	A	A	A	A	A
AX-94496430	T/G	1A	2377608	+	NA	NA	NA	NA	NA	NA	T	T	T	T	T	T	K	T	T	T	T	T	T	T	T	T	T	T	T	T	T	T	T	T	T	T	T	T	T	T	T	T	T	T	T	T	T	T	G
AX-94581354	A/C	1A	2920151	+	NA	NA	NA	NA	NA	NA	A	A	A	A	C	C	C	A	A	A	A	A	A	M	A	A	A	A	A	A	A	A	A	A	A	A	A	A	A	A	A	C	C	C	A	A	A	A	C
AX-179561021	G/A	1A	3386936	+	NA	NA	NA	NA	NA	NA	G	G	G	G	G	G	G	G	G	G	G	G	G	G	N	G	G	N	G	G	G	G	G	G	G	G	R	G	G	G	G	G	G	G	R	G	R	G	G
AX-95679152	G/A	1A	3386936	+	NA	NA	NA	NA	NA	NA	G	G	G	G	G	G	G	G	G	G	G	G	G	G	N	G	G	R	G	G	G	G	G	G	G	G	R	G	G	G	N	G	G	G	R	G	R	G	G
AX-111010650	A/G	1A	4204732	+	NA	NA	NA	NA	NA	NA	A	A	A	A	A	A	A	A	A	A	G	A	A	G	A	A	A	A	G	G	G	G	A	A	G	A	A	A	A	A	A	A	G	A	A	A	A	A	A
AX-94945604	C/A	1A	4502788	+	NA	NA	NA	NA	NA	NA	C	A	C	A	C	C	A	C	A	A	A	A	C	A	C	A	A	A	A	A	A	A	N	A	A	C	C	C	C	C	C	C	C	C	C	A	C	C	C
AX-86180188	G/T	1A	5024234	+	NA	NA	NA	NA	NA	NA	G	T	G	G	G	G	G	G	G	G	T	G	G	T	G	G	G	N	T	T	T	T	G	G	T	G	G	G	G	G	G	N	T	G	G	G	G	G	G
AX-86180189	G/T	1A	5024234	+	NA	NA	NA	NA	NA	NA	G	T	G	G	G	G	G	G	G	G	T	G	G	T	G	G	G	G	T	T	T	T	G	G	T	G	G	G	G	G	G	T	T	G	G	G	G	G	G
AX-95230167	A/G	1A	5028362	+	NA	NA	NA	NA	NA	NA	A	G	A	A	A	A	A	A	A	A	G	A	A	G	A	A	A	A	G	G	G	G	A	A	G	A	A	A	A	A	A	G	G	A	A	A	A	A	A
AX-94562727	G/T	1A	5646294	+	NA	NA	NA	NA	NA	NA	T	G	G	G	G	G	G	G	G	G	T	G	G	G	G	G	G	G	G	G	G	G	G	G	G	G	T	G	G	G	N	G	G	G	G	G	T	G	G
AX-94540853	G/A	1A	6517496	+	NA	NA	NA	NA	NA	NA	G	A	G	G	G	G	G	G	G	G	G	G	G	A	N	G	G	G	G	G	G	G	G	G	N	G	G	G	G	G	G	A	A	G	G	G	G	G	G
AX-94565087	C/G	1A	6633401	+	NA	NA	NA	NA	NA	NA	C	G	C	G	C	C	G	C	N	C	C	G	C	G	N	C	G	C	C	C	C	C	G	G	C	C	G	C	C	C	N	G	G	G	G	G	G	C	C
AX-94543458	G/A	1A	6639242	+	NA	NA	NA	NA	NA	NA	G	A	G	A	G	G	A	G	A	G	G	A	G	A	A	G	A	A	A	N	A	N	A	A	N	G	A	G	G	G	G	A	A	A	A	A	A	G	G
AX-109931368	T/C	1A	7181881	+	NA	NA	NA	NA	NA	NA	T	T	T	T	T	T	T	T	T	T	T	T	T	T	T	T	T	Y	Y	Y	Y	Y	T	T	Y	T	T	T	T	T	T	T	T	T	T	T	T	T	Y
AX-179559571	T/C	1A	7181881	+	NA	NA	NA	NA	NA	NA	T	T	T	T	T	T	T	T	T	T	T	T	T	T	T	T	T	C	C	C	C	C	T	T	C	T	T	T	T	T	T	T	T	T	T	T	T	T	C
AX-86172714	G/A	1A	7184821	+	NA	NA	NA	NA	NA	NA	G	G	G	G	G	G	G	G	G	G	G	G	G	G	G	G	G	A	A	A	A	A	G	G	A	G	G	G	G	G	G	G	A	G	G	G	G	G	A
AX-86172715	G/A	1A	7184821	+	NA	NA	NA	NA	NA	NA	G	G	G	G	G	G	G	G	G	G	G	G	G	G	G	G	G	A	A	A	A	A	G	G	A	G	G	G	G	G	G	G	A	G	G	G	G	G	A
AX-94692394	C/T	1A	7186246	+	NA	NA	NA	NA	NA	NA	C	C	C	Y	C	C	N	C	C	C	C	Y	C	Y	C	C	C	N	C	N	C	N	C	C	C	C	C	C	C	C	C	C	C	C	C	C	C	C	C
AX-179388397	A/G	1A	7294614	+	NA	NA	NA	NA	NA	NA	A	A	A	A	A	A	A	A	A	A	G	A	A	G	A	A	A	G	G	G	G	G	A	A	G	A	A	A	A	A	A	A	G	A	A	A	A	G	G
AX-95630149	A/G	1A	7294614	+	NA	NA	NA	NA	NA	NA	A	A	A	A	A	A	A	A	A	A	G	A	A	G	A	A	A	G	G	G	G	G	A	A	G	A	A	A	A	A	A	A	G	A	A	A	A	G	G
AX-109357370	C/T	1A	7332007	+	NA	NA	NA	NA	NA	NA	T	C	C	C	T	T	C	C	C	T	T	C	T	C	C	T	C	T	T	T	T	T	C	C	T	T	C	T	T	T	T	C	T	C	C	C	C	T	T
AX-109820251	T/C	1A	7363621	+	NA	NA	NA	NA	NA	NA	C	T	T	T	C	C	T	T	T	C	C	T	C	T	T	C	T	C	C	C	C	C	T	T	C	C	T	C	C	C	C	T	C	T	T	T	T	C	C
AX-110558138	A/C	1A	7658314	+	NA	NA	NA	NA	NA	NA	A	C	C	A	A	A	A	C	A	A	N	A	A	C	A	A	A	A	A	A	A	A	A	A	A	A	A	A	A	A	A	C	A	A	A	A	A	A	A
AX-94748758	A/C	1A	7658314	+	NA	NA	NA	NA	NA	NA	A	C	C	A	A	A	A	C	A	A	A	A	A	C	N	A	A	A	A	A	A	A	A	A	A	A	A	A	A	A	C	C	A	A	A	A	A	A	A
AX-94977486	G/T	1A	7692023	+	NA	NA	NA	NA	NA	NA	G	T	T	G	G	G	G	T	G	G	G	G	G	T	G	G	G	G	G	G	G	G	G	G	G	G	G	G	G	G	G	T	G	G	G	G	G	G	G
AX-109988105	G/T	1A	7697658	+	NA	NA	NA	NA	NA	NA	G	T	T	G	G	G	G	T	G	G	G	G	G	T	G	G	G	G	G	G	G	G	G	G	G	G	G	G	G	G	G	T	G	G	G	G	G	G	G
AX-179560464	A/G	1A	8244156	+	NA	NA	NA	NA	NA	NA	A	A	A	A	A	A	A	A	A	A	A	R	R	A	A	A	A	A	A	A	A	R	R	R	A	A	A	R	R	R	N	A	A	A	A	A	A	A	A
AX-179558496	A/G	1A	8296948	+	NA	NA	NA	NA	NA	NA	A	A	G	A	A	A	A	G	A	A	A	A	A	G	A	A	A	A	A	A	A	A	A	A	A	A	A	A	A	A	A	A	G	A	A	A	A	A	G
AX-95658304	A/G	1A	8296948	+	NA	NA	NA	NA	NA	NA	A	A	G	A	A	A	A	G	A	A	A	A	A	G	A	A	A	A	A	A	A	A	A	N	A	A	A	A	A	A	A	A	R	A	A	A	A	A	G
AX-95207086	A/G	1A	8297044	+	NA	NA	NA	NA	NA	NA	A	A	A	A	R	R	A	A	A	A	G	A	A	A	G	A	A	A	A	A	A	A	A	A	A	A	A	A	A	A	A	A	A	A	A	A	A	A	A
AX-89629592	A/G	1A	8329287	+	NA	NA	NA	NA	NA	NA	A	A	A	A	A	A	A	G	A	A	A	A	A	G	A	A	A	A	A	A	A	A	A	A	A	A	A	A	A	A	A	A	G	A	A	A	A	A	G
AX-94950558	T/C	1A	9204480	+	NA	NA	NA	NA	NA	NA	T	T	C	C	T	T	C	C	T	T	T	T	T	T	C	T	C	T	T	T	T	T	T	T	T	T	T	T	T	T	T	C	T	C	C	T	T	C	C
AX-94766336	G/A	1A	9357652	+	NA	NA	NA	NA	NA	NA	A	G	G	G	A	A	G	G	G	A	G	G	A	A	G	A	G	A	A	A	A	A	G	G	A	A	G	A	A	A	A	G	A	G	G	G	G	G	A
AX-94450466	T/C	1A	9476768	+	NA	NA	NA	NA	NA	NA	T	C	C	C	T	T	C	T	C	T	C	C	T	T	C	T	C	T	T	T	T	T	C	C	T	T	C	T	T	T	T	C	T	C	C	C	C	C	T
AX-179475552	G/A	1A	9544521	+	NA	NA	NA	NA	NA	NA	A	G	G	G	A	A	G	A	G	A	G	G	R	R	G	A	G	A	A	A	A	R	G	G	A	A	G	R	R	R	A	G	A	G	G	G	G	G	G
AX-89375925	C/T	1A	9579654	+	NA	NA	NA	NA	NA	NA	C	T	T	T	C	C	T	C	T	C	T	T	C	C	T	C	T	C	C	C	C	C	T	T	C	C	T	C	C	C	C	T	C	T	T	T	T	T	T
AX-95652724	C/T	1A	9579689	+	NA	NA	NA	NA	NA	NA	C	T	T	T	C	C	T	C	T	C	T	T	C	C	T	C	T	C	C	C	C	C	T	T	C	C	T	C	C	C	C	T	C	T	T	T	T	T	T
AX-94601688	C/T	1A	9579907	+	NA	NA	NA	NA	NA	NA	C	T	C	C	C	C	C	C	C	C	T	T	C	C	C	C	C	C	C	C	C	C	C	C	C	C	C	C	C	C	C	T	C	C	C	C	C	T	C
AX-95653834	C/T	1A	9579907	+	NA	NA	NA	NA	NA	NA	C	T	C	C	C	C	C	C	C	C	Y	T	C	C	C	C	C	C	C	C	C	C	C	C	C	C	C	C	C	C	C	Y	C	C	C	C	C	Y	C
AX-94532387	T/C	1A	9589005	+	NA	NA	NA	NA	NA	NA	T	C	N	C	T	T	C	T	C	T	C	C	T	T	C	T	C	T	T	T	T	T	C	C	T	T	C	T	T	T	T	C	N	C	C	C	C	C	C
AX-95239997	T/C	1A	9642399	+	NA	NA	NA	NA	NA	NA	T	C	C	C	T	T	C	T	C	T	C	N	T	T	C	T	C	T	T	T	T	T	C	C	T	T	C	T	T	T	T	C	T	C	C	C	C	C	C
AX-95234061	A/G	1A	9980785	+	NA	NA	NA	NA	NA	NA	A	A	A	A	G	G	A	A	A	A	A	A	A	G	A	A	A	A	A	A	A	A	A	A	A	A	A	A	A	A	A	A	G	A	A	A	A	A	A
AX-112289915	G/A	1A	10048700	+	NA	NA	NA	NA	NA	NA	G	G	G	G	A	A	G	G	G	G	G	G	G	A	G	G	G	G	G	G	G	G	G	G	G	G	G	G	G	G	G	G	A	G	G	G	G	G	A
AX-95659882	G/A	1A	10048700	+	NA	NA	NA	NA	NA	NA	G	G	G	G	A	A	G	G	G	G	G	G	G	A	G	G	G	G	G	G	G	G	G	G	G	G	G	G	G	G	G	G	A	G	G	G	G	G	A
AX-94778966	C/T	1A	10067503	+	NA	NA	NA	NA	NA	NA	T	C	T	C	T	T	C	C	C	T	C	C	T	T	C	T	C	C	C	C	C	C	C	C	C	T	C	C	T	T	T	C	T	C	C	C	C	C	C
AX-179560763	A/G	1A	10068932	+	NA	NA	NA	NA	NA	NA	G	A	G	A	G	G	A	A	A	G	A	A	G	G	A	G	A	A	A	A	A	A	A	A	A	G	A	A	G	G	G	A	G	A	A	A	A	A	G
AX-95659697	A/G	1A	10068932	+	NA	NA	NA	NA	NA	NA	G	A	G	A	G	G	A	A	A	G	A	A	G	G	A	G	A	A	A	A	A	A	A	A	A	G	A	A	G	G	G	A	G	A	A	A	A	A	G
AX-179475604	C/T	1A	10069836	+	NA	NA	NA	NA	NA	NA	C	Y	C	Y	C	C	Y	Y	Y	C	Y	Y	C	C	Y	C	N	Y	Y	Y	Y	Y	Y	Y	Y	C	Y	Y	C	C	C	Y	N	Y	N	Y	Y	N	C
AX-95653141	T/C	1A	10069836	+	NA	NA	NA	NA	NA	NA	C	T	C	T	C	C	T	T	T	C	T	T	C	C	T	C	T	T	T	T	T	T	T	T	T	C	T	T	C	C	C	T	C	T	T	T	T	T	C
AX-179557970	C/A	1A	10069891	+	NA	NA	NA	NA	NA	NA	A	C	A	C	A	A	C	C	C	A	C	C	A	A	C	A	C	C	C	C	C	C	C	C	C	A	C	C	A	A	A	C	A	C	C	C	C	C	C
AX-95234918	C/A	1A	10069891	+	NA	NA	NA	NA	NA	NA	A	C	A	C	A	A	C	C	C	A	C	C	A	A	C	A	C	C	C	C	C	C	C	C	C	A	C	C	A	A	A	C	A	C	C	C	C	C	C
AX-94939233	G/A	1A	10084831	+	NA	NA	NA	NA	NA	NA	A	A	G	A	A	A	A	G	G	A	G	A	G	A	G	A	G	A	G	G	G	G	G	G	G	G	G	G	G	G	G	G	G	G	G	G	G	G	A
AX-95186303	C/A	1A	10085098	+	NA	NA	NA	NA	NA	NA	A	A	A	C	A	A	C	C	C	A	A	A	A	A	A	A	C	C	C	C	C	C	C	C	C	A	C	A	A	A	A	A	A	C	A	C	C	A	C
AX-95200832	G/T	1A	10248231	+	NA	NA	NA	NA	NA	NA	G	K	G	G	G	G	G	G	G	G	K	K	G	G	K	G	G	G	G	G	G	G	G	G	G	G	G	K	G	G	G	K	G	G	K	G	G	K	G
AX-111506120	T/C	1A	10975625	+	NA	NA	NA	NA	NA	NA	T	C	T	T	T	T	T	T	T	T	C	C	T	T	C	T	T	T	T	T	T	T	T	T	T	T	T	C	T	T	T	C	C	T	C	T	T	C	C
AX-94401561	G/T	1A	11229740	+	NA	NA	NA	NA	NA	NA	G	G	G	G	G	G	G	G	G	G	T	T	G	G	T	G	G	G	G	G	G	G	G	G	G	G	G	T	G	G	G	G	G	G	T	G	G	G	T
AX-108916554	T/C	1A	11531244	+	NA	NA	NA	NA	NA	NA	T	T	T	T	T	T	T	T	T	T	Y	Y	T	T	C	T	T	T	T	T	T	T	T	T	T	T	T	Y	T	T	T	T	T	T	C	T	T	T	C
AX-89478051	C/T	1A	11566853	+	NA	NA	NA	NA	NA	NA	C	C	C	C	C	C	C	C	C	C	C	C	C	C	C	C	C	C	C	C	C	C	C	C	C	C	C	C	C	C	C	C	T	C	C	C	C	C	C
AX-108980671	G/C	1A	11662445	+	NA	NA	NA	NA	NA	NA	G	G	G	G	G	G	G	G	G	G	C	C	G	G	C	G	G	G	G	G	G	G	G	G	G	G	G	C	G	G	G	G	G	G	C	G	G	G	C
AX-94943073	T/A	1A	11672012	+	NA	NA	NA	NA	NA	NA	N	A	A	T	A	A	T	T	W	T	T	N	T	A	W	T	T	T	T	T	T	T	A	W	T	T	T	N	N	T	A	A	A	W	T	W	T	A	N
AX-95231896	C/G	1A	11722392	+	NA	NA	NA	NA	NA	NA	C	G	G	C	G	G	C	C	C	C	C	C	C	G	C	C	C	C	C	C	C	C	G	C	C	C	C	C	C	C	C	G	G	C	C	C	C	G	C
AX-111450227	G/T	1A	11811813	+	NA	NA	NA	NA	NA	NA	G	G	G	G	G	G	G	G	G	G	T	T	G	G	T	G	G	G	G	G	G	G	G	G	G	G	G	T	G	G	G	G	G	G	T	G	G	G	T
AX-109057262	G/C	1A	11829230	+	NA	NA	NA	NA	NA	NA	G	G	G	G	G	G	G	G	G	G	C	C	G	G	C	G	G	G	G	G	G	G	G	G	G	G	G	C	G	G	G	G	G	G	C	G	G	G	C
AX-109984454	C/T	1A	11897062	+	NA	NA	NA	NA	NA	NA	C	T	T	C	T	T	C	C	C	C	C	C	C	T	C	C	C	C	C	C	C	C	T	C	C	C	C	C	C	C	C	T	C	C	C	C	C	T	C
AX-94791155	C/T	1A	11934089	+	NA	NA	NA	NA	NA	NA	C	C	C	C	C	C	C	C	C	C	T	T	C	C	T	C	C	C	C	C	C	C	C	C	C	C	C	T	C	C	Y	C	C	C	T	C	C	C	T
AX-86172992	T/C	1A	11934920	+	NA	NA	NA	NA	NA	NA	T	T	T	T	T	T	T	T	T	T	C	C	T	T	C	T	T	T	T	T	T	T	T	T	T	T	T	C	T	T	T	T	T	T	C	T	T	T	C
AX-95630869	C/T	1A	11940187	+	NA	NA	NA	NA	NA	NA	C	C	C	C	C	C	C	C	C	C	T	T	C	C	T	C	C	C	C	C	C	C	C	C	C	C	C	T	C	C	C	C	C	C	T	C	C	C	T
AX-112290021	C/T	1A	11941764	+	NA	NA	NA	NA	NA	NA	C	C	C	C	C	C	C	C	C	C	T	T	C	C	Y	C	C	C	C	C	C	C	C	C	C	C	C	T	C	C	C	C	C	C	T	C	C	C	T
AX-179558136	C/T	1A	11941764	+	NA	NA	NA	NA	NA	NA	C	C	C	C	C	C	C	C	C	C	Y	Y	C	C	Y	C	C	C	C	C	C	C	C	C	C	C	C	Y	C	C	C	C	C	C	Y	C	C	C	Y
AX-86178520	G/A	1A	11950587	+	NA	NA	NA	NA	NA	NA	G	G	G	G	G	G	G	G	G	G	R	R	G	G	R	G	G	G	G	G	G	G	G	G	G	G	G	R	G	G	G	G	A	G	R	G	G	G	R
AX-95107625	A/G	1A	11951913	+	NA	NA	NA	NA	NA	NA	A	A	A	A	A	A	A	A	A	A	G	G	A	A	G	A	A	A	A	A	A	A	A	A	A	A	A	G	A	A	A	A	G	A	G	A	A	A	G
AX-95105886	C/T	1A	12003536	+	NA	NA	NA	NA	NA	NA	C	C	C	C	C	C	C	C	C	C	T	T	C	C	C	C	C	C	C	C	C	C	C	C	C	C	C	T	C	C	C	C	C	C	T	C	C	C	T
AX-94922039	C/G	1A	12098331	+	NA	NA	NA	NA	NA	NA	C	C	C	C	C	C	C	C	C	C	G	G	C	C	G	C	C	C	C	C	C	C	C	C	C	C	C	G	C	C	C	C	C	C	G	C	C	C	G
AX-94457852	T/C	1A	12142370	+	NA	NA	NA	NA	NA	NA	C	T	C	T	C	C	T	T	T	T	T	T	T	T	C	T	T	T	T	T	T	T	C	C	T	T	T	T	T	T	T	C	C	C	T	T	T	C	C
AX-94402122	G/C	1A	12142475	+	NA	NA	NA	NA	NA	NA	G	G	G	G	G	G	G	G	G	G	N	C	G	G	C	G	G	G	G	G	G	G	G	G	G	G	G	C	G	G	G	G	G	G	C	G	G	G	C
AX-95182057	A/G	1A	12157386	+	NA	NA	NA	NA	NA	NA	A	A	A	A	A	A	A	A	A	A	G	G	A	G	G	A	A	A	A	A	A	A	A	A	A	A	A	G	A	A	A	A	A	A	G	A	A	A	G
AX-178078198	G/A	1A	12303846	+	NA	NA	NA	NA	NA	NA	G	A	G	G	A	A	G	A	G	G	A	A	G	A	A	G	G	A	G	G	G	G	G	G	G	G	G	A	G	G	A	A	G	G	A	G	G	A	A
AX-94901922	G/A	1A	12303846	+	NA	NA	NA	NA	NA	NA	G	A	G	G	A	A	G	A	G	G	A	A	G	A	A	G	G	A	G	G	G	G	G	G	G	G	G	A	G	G	A	A	G	G	A	G	G	A	A
AX-94415522	T/C	1A	12304195	+	NA	NA	NA	NA	NA	NA	T	Y	T	T	Y	Y	T	Y	T	T	T	T	T	T	T	T	T	Y	T	T	T	T	T	T	T	T	T	T	T	T	N	Y	T	T	T	T	T	Y	T
AX-95631360	T/C	1A	12304195	+	NA	NA	NA	NA	NA	NA	T	C	T	T	C	C	T	N	T	T	T	T	T	T	T	T	T	C	T	T	T	T	T	T	T	T	T	T	T	T	T	C	T	T	T	T	T	C	T
AX-179559197	G/A	1A	12304546	+	NA	NA	NA	NA	NA	NA	G	G	G	G	G	G	G	G	G	G	A	A	G	G	A	G	G	G	G	G	G	G	G	G	G	G	G	A	G	G	G	G	G	G	A	G	G	G	A
AX-94577477	G/T	1A	12305362	+	NA	NA	NA	NA	NA	NA	G	G	G	G	G	N	G	G	G	G	T	T	G	T	T	G	G	G	G	G	G	G	G	G	G	G	G	T	G	G	T	G	G	G	T	G	G	G	T
AX-94652195	T/G	1A	12313754	+	NA	NA	NA	NA	NA	NA	T	G	T	T	G	G	T	G	T	T	K	T	T	T	K	T	T	G	T	T	T	T	T	T	T	T	T	T	T	T	T	N	K	T	T	T	T	G	K
AX-179557791	A/G	1A	12364396	+	NA	NA	NA	NA	NA	NA	A	A	A	A	A	A	A	A	A	A	G	G	A	A	N	A	A	A	A	A	A	A	A	A	A	A	A	G	A	A	N	A	A	A	G	A	A	A	G
AX-89760147	A/G	1A	12364396	+	NA	NA	NA	NA	NA	NA	A	A	A	A	A	A	A	A	A	A	G	G	A	A	G	A	A	A	A	A	A	A	A	A	A	A	A	G	A	A	N	A	A	A	G	A	A	A	G
AX-86177445	G/C	1A	12369428	+	NA	NA	NA	NA	NA	NA	G	G	C	G	G	G	G	G	G	G	G	G	G	G	G	G	G	G	G	G	G	G	C	G	G	G	G	G	G	G	G	G	C	G	G	G	G	G	G
AX-94477156	T/C	1A	12497532	+	NA	NA	NA	NA	NA	NA	T	T	C	T	T	T	T	T	T	T	T	T	T	T	T	T	T	C	T	T	T	T	C	T	T	T	T	T	T	T	C	T	C	T	T	T	T	T	T
AX-95109260	C/T	1A	12506673	+	NA	NA	NA	NA	NA	NA	C	C	C	C	C	C	C	C	C	C	T	T	C	T	T	C	C	C	C	C	C	N	C	C	C	C	C	T	C	N	C	C	C	C	T	C	C	C	T
AX-94706443	G/A	1A	12918632	+	NA	NA	NA	NA	NA	NA	G	G	G	G	G	G	G	G	G	G	A	A	G	A	A	G	G	G	G	G	G	A	G	G	G	G	G	G	A	A	N	G	G	G	G	G	G	G	G
AX-109983497	T/C	1A	13740926	+	NA	NA	NA	NA	NA	NA	T	T	T	T	T	T	T	T	T	T	C	C	T	T	C	T	T	T	T	T	T	T	T	T	T	T	T	C	T	T	T	T	T	T	C	T	T	T	C
AX-94576586	C/T	1A	13762834	+	NA	NA	NA	NA	NA	NA	C	C	C	C	C	C	C	C	C	C	T	T	C	C	T	C	C	C	C	C	C	C	C	C	C	C	C	T	C	C	C	C	C	C	T	C	C	C	T
AX-179476671	A/G	1A	13767640	+	NA	NA	NA	NA	NA	NA	A	G	A	A	A	A	A	A	A	A	N	A	A	A	G	A	A	G	A	A	A	A	A	A	A	A	A	G	A	A	R	A	A	G	G	A	A	A	A
AX-94929639	A/G	1A	13767640	+	NA	NA	NA	NA	NA	NA	A	G	A	A	A	A	A	A	A	A	A	A	A	A	G	A	A	G	A	A	A	A	A	A	A	A	A	G	A	A	G	A	A	G	G	A	A	A	A
AX-94404380	A/G	1A	13861525	+	NA	NA	NA	NA	NA	NA	A	A	A	A	A	A	A	A	A	A	G	G	A	A	G	A	A	A	A	A	A	A	A	A	A	A	A	G	A	A	A	A	A	A	G	A	A	A	G
AX-110094899	T/C	1A	13972239	+	NA	NA	NA	NA	NA	NA	T	T	T	T	T	T	T	T	T	T	C	C	T	T	C	T	T	T	T	T	T	T	T	T	T	T	T	C	T	T	T	N	T	T	C	T	T	T	C
AX-95659816	T/C	1A	14056065	+	NA	NA	NA	NA	NA	NA	T	T	T	C	T	T	C	C	C	T	C	C	T	T	C	T	C	T	T	T	T	T	T	C	T	T	C	C	T	T	T	C	T	C	C	C	C	T	C
AX-94910059	C/A	1A	14108199	+	NA	NA	NA	NA	NA	NA	C	C	C	A	C	C	A	A	A	C	A	A	C	C	A	C	A	A	C	C	C	C	C	A	C	C	A	A	C	C	C	A	C	A	A	A	A	C	A
AX-94658551	A/C	1A	14108359	+	NA	NA	NA	NA	NA	NA	C	C	A	A	A	A	A	A	A	C	A	A	A	A	A	C	C	A	C	C	C	C	A	A	A	A	A	A	A	A	A	A	C	A	A	A	A	A	A
AX-94773234	G/A	1A	14109176	+	NA	NA	NA	NA	NA	NA	G	G	G	A	G	G	A	A	A	G	A	A	G	G	N	N	A	A	N	G	G	N	G	A	G	G	A	A	G	G	G	A	G	A	A	A	A	G	A
AX-95020827	G/A	1A	14142813	+	NA	NA	NA	NA	NA	NA	G	G	G	A	G	G	A	A	A	G	A	A	G	G	A	G	A	A	G	G	G	G	G	A	G	G	G	A	G	G	G	A	G	A	A	A	A	G	A
AX-110628885	C/T	1A	14143271	+	NA	NA	NA	NA	NA	NA	C	C	C	T	C	C	T	T	T	C	T	T	C	C	T	C	T	T	C	C	C	C	C	T	C	C	C	T	C	C	C	T	C	T	T	T	T	C	T
AX-94939012	C/T	1A	14143271	+	NA	NA	NA	NA	NA	NA	C	C	C	T	C	C	T	T	T	C	T	T	C	C	N	C	T	T	C	C	C	C	C	T	C	C	C	T	C	C	C	T	C	T	T	T	T	C	T
AX-108909949	C/T	1A	14143316	+	NA	NA	NA	NA	NA	NA	C	C	C	T	C	C	T	T	T	C	T	T	C	C	T	C	T	T	C	C	C	C	C	T	C	C	C	T	C	C	C	T	C	T	T	T	T	C	T
AX-179559622	C/T	1A	14143316	+	NA	NA	NA	NA	NA	NA	C	C	C	T	C	C	T	T	T	C	T	T	C	C	T	C	T	T	C	C	C	C	C	T	C	C	C	T	C	C	C	T	C	T	T	T	T	C	T
AX-112288844	T/C	1A	14163100	+	NA	NA	NA	NA	NA	NA	T	T	T	C	T	T	C	C	C	T	C	C	T	T	C	T	C	C	T	T	T	T	T	C	T	T	T	C	T	T	Y	C	N	C	C	C	C	T	C
AX-95654655	T/C	1A	14163135	+	NA	NA	NA	NA	NA	NA	T	T	T	C	T	T	C	C	C	T	C	C	T	T	C	T	C	C	T	T	T	T	T	C	T	T	T	C	T	T	T	C	T	C	C	C	C	T	C
AX-94411045	C/T	1A	14521034	+	NA	NA	NA	NA	NA	NA	C	T	C	C	C	C	C	C	C	C	C	C	C	C	C	C	C	C	T	T	T	T	C	C	T	C	C	C	C	C	C	C	N	C	C	C	C	C	C
AX-178067775	T/C	1A	14521538	+	NA	NA	NA	NA	NA	NA	C	T	C	T	C	C	T	T	T	C	T	T	C	C	T	C	T	T	T	T	T	T	C	T	T	C	C	T	C	C	C	T	T	T	T	T	T	C	T
AX-110928134	A/G	1A	15348662	+	NA	NA	NA	NA	NA	NA	A	A	A	G	A	A	G	G	G	A	G	G	A	A	G	A	G	G	A	A	A	A	A	G	A	A	A	G	A	A	A	G	A	G	G	G	G	A	G
AX-109275707	G/A	1A	15431961	+	NA	NA	NA	NA	NA	NA	G	G	G	A	G	G	A	A	A	G	A	A	G	G	A	G	A	A	G	G	G	G	G	A	G	G	G	A	G	G	G	A	G	A	A	A	A	G	A
AX-108891784	G/C	1A	15437274	+	NA	NA	NA	NA	NA	NA	G	G	G	C	G	G	C	C	N	G	C	C	G	G	C	G	C	C	G	G	G	G	G	C	G	G	G	C	G	G	G	C	G	C	C	C	C	G	C
AX-94607056	A/G	1A	15438341	+	NA	NA	NA	NA	NA	NA	A	A	A	G	A	A	G	G	G	A	G	G	A	A	G	A	G	G	A	A	A	A	A	G	A	A	A	G	A	A	A	G	A	G	G	G	G	A	G
AX-179560900	A/G	1A	15438899	+	NA	NA	NA	NA	NA	NA	N	G	G	A	G	G	A	A	A	G	A	A	G	G	A	G	A	A	A	A	A	A	G	A	A	G	G	A	G	G	N	A	G	A	A	A	A	G	A
AX-95659772	G/A	1A	15438899	+	NA	NA	NA	NA	NA	NA	G	G	G	A	G	G	A	A	A	G	A	A	G	G	A	G	A	A	A	A	A	A	G	A	A	G	G	A	G	G	N	A	G	A	A	A	A	G	A
AX-109344363	G/A	1A	16376768	+	NA	NA	NA	NA	NA	NA	G	G	G	A	R	R	A	A	A	G	A	A	G	G	A	G	A	A	R	R	R	R	G	A	R	G	G	A	G	G	G	A	G	A	A	A	A	G	A
AX-86185114	T/C	1A	16389643	+	NA	NA	NA	NA	NA	NA	T	T	T	T	T	T	T	T	T	T	C	C	T	T	C	T	T	T	T	T	T	T	T	T	T	T	T	C	T	T	T	T	T	T	C	T	T	T	C
AX-86185115	T/C	1A	16389643	+	NA	NA	NA	NA	NA	NA	T	T	T	T	T	T	T	T	T	T	C	C	T	T	C	T	T	T	T	T	T	T	T	T	T	T	T	C	T	T	T	T	T	T	C	T	T	T	C
AX-86164347	A/C	1A	16434515	+	NA	NA	NA	NA	NA	NA	A	C	A	A	C	C	A	A	A	A	A	A	A	C	A	A	A	A	C	C	C	C	A	A	C	A	A	A	A	A	A	A	C	A	A	A	A	C	A
AX-86164348	A/C	1A	16434515	+	NA	NA	NA	NA	NA	NA	A	C	A	A	C	C	A	A	A	A	A	A	A	C	A	A	A	A	C	C	C	C	A	A	C	A	A	A	A	A	A	A	C	A	A	A	A	C	A
AX-108928619	G/A	1A	16940955	+	NA	NA	NA	NA	NA	NA	G	A	G	G	A	A	G	G	G	G	G	G	G	A	G	G	G	G	A	A	A	A	G	G	A	G	G	G	G	G	G	G	A	G	G	G	G	G	G
AX-94923681	G/A	1A	17010740	+	NA	NA	NA	NA	NA	NA	G	G	G	G	A	A	G	N	G	G	A	G	G	G	A	G	G	G	N	N	R	N	G	G	G	G	G	G	G	G	R	G	G	G	A	G	G	G	A
AX-110085424	A/G	1A	17851365	+	NA	NA	NA	NA	NA	NA	A	A	A	G	A	A	G	G	R	A	G	G	A	A	G	A	G	G	A	A	A	A	A	G	A	A	A	G	A	A	A	G	G	G	G	G	G	A	G
AX-110016951	C/T	1A	17852642	+	NA	NA	NA	NA	NA	NA	C	C	C	T	C	C	T	T	T	C	T	T	C	C	T	C	T	T	C	C	C	C	C	T	C	C	C	T	C	C	C	T	C	T	T	T	T	C	T
AX-111017764	A/C	1A	18048549	+	NA	NA	NA	NA	NA	NA	A	A	A	C	A	A	C	C	C	A	C	C	A	A	N	A	C	C	A	A	A	A	A	C	A	A	A	C	A	A	A	C	C	C	C	C	C	A	C
AX-109886261	T/C	1A	18306923	+	NA	NA	NA	NA	NA	NA	T	T	T	C	T	T	C	C	C	T	C	C	T	T	C	T	C	C	T	T	T	T	T	C	T	T	T	C	T	T	T	C	T	C	C	C	C	T	C
AX-111050434	T/G	1A	18460385	+	NA	NA	NA	NA	NA	NA	N	T	T	G	T	T	G	G	G	T	G	G	T	T	G	T	G	G	T	T	T	T	T	G	T	T	T	G	T	T	T	G	T	G	G	G	G	T	G
AX-95631038	T/C	1A	18486532	+	NA	NA	NA	NA	NA	NA	T	T	T	C	T	T	C	C	C	T	C	C	T	T	C	T	C	C	T	T	T	T	T	C	T	T	T	C	T	T	T	C	T	C	C	C	C	T	C
AX-94472344	C/T	1A	18486727	+	NA	NA	NA	NA	NA	NA	C	C	C	C	C	C	C	T	C	C	C	C	C	C	C	C	C	C	C	C	C	C	C	C	C	T	C	C	C	C	C	C	C	C	C	C	C	T	T
AX-111125144	C/T	1A	18487694	+	NA	NA	NA	NA	NA	NA	C	C	C	T	C	C	T	T	T	C	T	T	C	C	T	C	T	T	C	C	C	C	C	T	C	C	C	T	C	C	C	T	C	T	T	T	T	C	T
AX-94675104	G/T	1A	19310607	+	NA	NA	NA	NA	NA	NA	G	G	G	T	G	G	N	T	T	G	K	K	G	G	T	G	T	T	G	G	G	G	G	T	G	G	G	T	G	G	G	K	G	T	T	T	T	G	K
AX-86179365	A/C	1A	20094316	+	NA	NA	NA	NA	NA	NA	A	A	A	C	A	A	C	C	C	A	C	C	A	A	C	A	C	C	A	A	A	A	A	C	A	A	A	C	A	A	A	C	C	C	C	C	C	A	C
AX-86179366	A/C	1A	20094316	+	NA	NA	NA	NA	NA	NA	A	A	A	C	A	A	C	C	C	A	C	C	A	A	C	A	C	C	A	A	A	A	A	C	A	A	A	C	A	A	A	C	N	C	C	C	C	A	C
AX-95659606	C/A	1A	20094430	+	NA	NA	NA	NA	NA	NA	M	A	A	C	A	A	C	C	C	A	C	C	A	A	C	A	C	C	A	A	A	A	N	C	A	M	A	C	A	A	A	C	N	C	C	C	C	A	C
AX-94823774	A/G	1A	20158237	+	NA	NA	NA	NA	NA	NA	A	A	A	A	A	A	A	A	A	A	G	A	A	A	A	A	A	A	A	A	A	A	A	A	A	A	A	A	A	A	A	A	G	A	A	A	A	A	G
AX-94606615	G/C	1A	20158331	+	NA	NA	NA	NA	NA	NA	G	G	G	C	C	C	G	G	C	C	G	G	G	G	C	G	G	G	C	C	G	G	G	G	C	G	G	C	G	G	G	C	C	C	G	C	G	C	C
AX-179559170	A/G	1A	20183329	+	NA	NA	NA	NA	NA	NA	A	A	A	G	A	A	G	G	G	A	G	G	A	A	G	A	N	G	A	A	A	A	A	G	A	A	A	N	A	A	A	G	A	G	G	G	G	A	G
AX-109941435	G/A	1A	20858739	+	NA	NA	NA	NA	NA	NA	G	G	G	G	G	G	G	G	G	G	A	A	G	G	A	G	A	G	G	G	G	G	G	A	G	G	G	A	G	G	G	G	G	G	A	A	A	A	G
AX-109348628	C/T	1A	20886837	+	NA	NA	NA	NA	NA	NA	C	C	C	C	T	T	C	C	C	C	C	C	C	T	C	C	C	C	C	C	C	C	C	C	C	C	C	C	C	C	C	C	C	C	C	C	C	C	C
AX-110983549	G/C	1A	20889896	+	NA	NA	NA	NA	NA	NA	G	G	G	G	C	C	G	G	G	G	G	G	G	C	G	G	G	G	G	G	G	G	G	G	G	G	G	G	G	G	G	G	G	G	G	G	G	G	G
AX-94657330	G/A	1A	20978783	+	NA	NA	NA	NA	NA	NA	G	G	G	G	A	A	G	G	G	G	A	A	G	A	A	G	G	G	G	G	G	G	G	G	G	G	G	A	G	G	G	G	A	G	A	G	G	A	A
AX-94388999	G/A	1A	21036065	+	NA	NA	NA	NA	NA	NA	G	G	G	G	A	A	G	G	G	G	A	A	G	A	A	G	G	G	G	G	G	G	G	G	G	G	G	A	G	G	G	G	A	G	A	G	G	A	A
AX-95658788	G/A	1A	21038166	+	NA	NA	NA	NA	NA	NA	G	G	G	G	A	A	G	G	G	G	A	A	G	A	A	G	G	G	G	G	G	G	G	G	G	G	G	A	G	G	G	G	A	G	A	G	G	A	A
AX-179477218	A/C	1A	21046355	+	NA	NA	NA	NA	NA	NA	A	A	A	A	C	C	A	A	A	A	C	C	A	C	C	A	A	A	C	C	C	C	A	A	C	A	A	C	A	A	A	A	C	A	C	A	A	C	C
AX-179477143	C/T	1A	21047359	+	NA	NA	NA	NA	NA	NA	C	C	C	C	T	T	C	C	C	C	T	T	C	T	T	C	C	C	C	C	C	C	C	C	C	C	C	T	C	C	C	C	T	C	T	C	C	T	T
AX-111540541	A/G	1A	21281310	+	NA	NA	NA	NA	NA	NA	N	A	A	A	A	A	A	A	A	A	G	G	A	G	G	A	A	A	A	A	A	A	A	A	A	A	A	G	A	A	A	A	G	A	G	A	A	G	G
AX-110375202	A/G	1A	21340768	+	NA	NA	NA	NA	NA	NA	A	A	A	A	A	A	A	A	A	A	G	G	A	G	G	A	A	A	A	A	A	A	A	A	A	A	A	G	A	A	A	A	G	A	G	A	A	G	G
AX-110037753	T/C	1A	21564506	+	NA	NA	NA	NA	NA	NA	T	C	T	T	C	C	T	T	T	T	C	C	C	C	C	T	T	T	T	T	T	C	T	T	T	T	T	C	C	C	T	T	T	C	C	T	T	C	C
AX-111604755	G/A	1A	21599878	+	NA	NA	NA	NA	NA	NA	G	G	G	G	G	G	G	G	G	G	A	A	G	A	A	G	G	G	G	G	G	G	G	G	G	G	G	A	G	G	G	G	A	G	A	G	G	A	A
AX-109882171	A/C	1A	21616904	+	NA	NA	NA	NA	NA	NA	M	A	M	C	A	A	M	M	A	C	A	A	A	A	A	M	M	M	C	C	C	A	A	A	C	M	M	A	A	A	M	A	C	A	A	A	M	A	A
AX-94599217	G/C	1A	21624404	+	NA	NA	NA	NA	NA	NA	G	G	G	G	G	G	G	G	G	G	C	C	G	C	C	G	G	G	G	G	G	G	G	G	G	G	G	C	G	G	G	G	C	G	C	G	G	C	C
AX-95084010	G/A	1A	21760081	+	NA	NA	NA	NA	NA	NA	R	R	G	R	A	A	R	R	R	R	R	G	R	G	A	R	R	G	G	G	G	G	R	R	G	G	R	R	R	R	R	R	R	R	R	R	R	G	A
AX-95085078	T/C	1A	22288741	+	NA	NA	NA	NA	NA	NA	T	T	N	T	C	C	T	T	T	T	T	C	T	C	C	T	T	C	C	C	C	C	C	T	C	C	T	T	T	T	T	T	C	T	T	T	T	C	C
AX-94513354	T/G	1A	22295061	+	NA	NA	NA	NA	NA	NA	T	T	G	T	T	T	T	T	T	T	T	G	T	G	T	T	T	G	G	G	G	G	G	T	G	G	T	T	T	T	T	T	G	T	T	T	T	G	T
AX-179475821	G/A	1A	22297261	+	NA	NA	NA	NA	NA	NA	R	G	G	G	G	G	G	R	G	G	G	G	G	G	G	G	G	G	G	G	G	G	G	G	G	R	G	G	G	G	G	G	G	G	G	G	G	G	G
AX-94759417	C/T	1A	22535570	+	NA	NA	NA	NA	NA	NA	C	C	C	C	C	C	C	C	C	C	T	T	C	T	T	C	C	C	C	C	C	C	C	C	C	C	C	T	C	C	N	C	T	C	T	C	C	T	T
AX-94710443	A/T	1A	22597010	+	NA	NA	NA	NA	NA	NA	A	A	A	A	A	A	A	A	A	A	T	T	A	T	T	A	A	A	A	A	A	A	A	A	A	A	A	T	A	A	A	A	T	A	T	A	A	T	T
AX-108775116	T/C	1A	22926040	+	NA	NA	NA	NA	NA	NA	Y	C	N	Y	C	C	Y	C	Y	N	Y	T	T	T	C	T	T	T	N	Y	T	T	Y	Y	Y	C	N	C	T	T	T	Y	T	C	C	Y	Y	C	C
AX-94926933	A/G	1A	23130891	+	NA	NA	NA	NA	NA	NA	A	A	A	A	G	G	A	A	A	A	G	G	A	G	G	A	A	A	A	A	A	A	A	A	A	A	A	G	A	A	A	A	G	A	G	A	A	A	A
AX-111793605	G/A	1A	23299231	+	NA	NA	NA	NA	NA	NA	G	G	G	G	A	A	G	G	G	G	A	A	G	A	A	G	G	A	G	A	G	G	G	G	G	G	G	A	G	G	G	G	G	G	A	G	G	A	A
AX-112289449	A/G	1A	23966437	+	NA	NA	NA	NA	NA	NA	A	A	A	A	G	G	A	A	A	A	A	A	A	A	G	A	A	A	A	A	A	A	A	A	A	A	A	A	A	A	A	A	A	A	A	A	A	A	G
AX-94783669	A/G	1A	23966437	+	NA	NA	NA	NA	NA	NA	A	A	A	A	G	G	A	A	A	A	A	A	A	A	G	A	A	A	A	A	A	A	A	A	A	A	A	A	A	A	A	A	G	A	A	A	A	A	G
AX-179475562	C/A	1A	24247379	+	NA	NA	NA	NA	NA	NA	C	C	C	C	C	C	C	C	C	C	A	A	C	A	A	C	C	C	C	C	C	C	C	C	C	C	C	A	C	C	C	C	C	C	A	C	C	A	A
AX-95630408	C/A	1A	24247379	+	NA	NA	NA	NA	NA	NA	C	C	C	C	C	C	C	C	C	C	A	A	C	A	A	C	C	C	C	C	C	C	C	C	C	C	C	A	C	C	C	C	C	C	A	C	C	A	A
AX-89639046	C/T	1A	24321355	+	NA	NA	NA	NA	NA	NA	C	C	C	C	C	C	C	C	C	C	T	T	C	T	T	C	C	C	C	C	C	C	C	C	C	C	C	T	C	C	C	C	C	C	T	C	C	T	T
AX-94547512	C/T	1A	24321355	+	NA	NA	NA	NA	NA	NA	C	C	C	C	C	C	C	C	C	C	T	T	C	T	T	C	C	C	C	C	C	C	C	C	C	C	C	T	C	C	C	C	C	C	T	C	C	T	T
AX-108991623	T/C	1A	24326954	+	NA	NA	NA	NA	NA	NA	T	T	T	T	T	T	T	T	T	T	C	C	T	C	C	T	T	T	T	T	T	T	T	T	T	T	T	C	T	T	T	T	T	T	C	T	T	C	C
AX-110181408	C/T	1A	24331546	+	NA	NA	NA	NA	NA	NA	C	C	C	C	T	T	C	C	C	C	C	C	C	C	C	C	C	C	C	C	C	C	C	C	C	C	C	C	C	C	C	C	T	C	C	C	C	C	C
AX-112290206	T/C	1A	24944403	+	NA	NA	NA	NA	NA	NA	T	T	T	T	T	T	T	T	T	T	C	C	T	C	C	T	T	T	T	T	T	T	T	T	T	T	T	C	T	T	T	T	T	T	C	T	T	C	C
AX-95187202	C/T	1A	24944708	+	NA	NA	NA	NA	NA	NA	C	C	C	C	T	T	C	C	C	C	C	C	C	C	C	C	C	C	C	C	C	C	C	C	C	C	C	C	C	C	C	C	T	C	C	C	C	C	C
AX-110620762	A/C	1A	25291430	+	NA	NA	NA	NA	NA	NA	A	A	A	A	A	A	A	A	A	A	C	C	A	C	C	A	A	A	A	A	A	A	A	A	A	A	A	C	A	A	A	A	A	A	C	A	A	C	C
AX-86171697	G/A	1A	25543187	+	NA	NA	NA	NA	NA	NA	G	G	G	G	A	A	G	G	G	G	G	G	G	G	G	G	G	G	G	G	G	G	G	G	G	G	G	G	G	G	G	G	A	G	G	G	G	G	G
AX-86171698	G/A	1A	25543187	+	NA	NA	NA	NA	NA	NA	G	G	G	G	A	A	G	G	G	G	G	G	G	G	G	G	G	G	G	G	G	G	G	G	G	G	G	G	G	G	G	G	A	G	G	G	G	G	G
AX-94917012	C/T	1A	25543322	+	NA	NA	NA	NA	NA	NA	C	C	C	C	T	T	C	C	C	C	T	T	C	T	T	C	C	C	C	C	C	C	C	C	C	C	C	T	C	C	C	C	T	C	T	C	C	T	T
AX-110065507	G/A	1A	25544648	+	NA	NA	NA	NA	NA	NA	G	G	G	G	A	A	G	G	G	G	G	G	G	G	G	G	G	G	G	G	G	G	G	G	G	G	G	G	G	G	G	G	A	G	G	G	G	G	G
AX-110418056	G/A	1A	25549220	+	NA	NA	NA	NA	NA	NA	G	G	G	G	A	A	G	G	G	G	G	G	G	G	G	G	G	G	G	G	G	G	G	G	G	G	G	G	G	G	G	G	A	G	G	G	G	G	G
AX-110713106	G/A	1A	26591035	+	NA	NA	NA	NA	NA	NA	G	G	G	G	A	A	G	G	G	G	G	G	G	G	G	G	G	G	G	G	G	G	G	G	G	G	G	G	G	G	G	G	G	G	G	G	G	G	G
AX-179559496	T/G	1A	26958877	+	NA	NA	NA	NA	NA	NA	T	T	T	T	G	G	T	T	T	T	T	T	T	T	T	T	T	T	T	T	T	T	T	T	T	T	T	T	T	T	T	T	T	T	T	T	T	T	T
AX-95631538	T/G	1A	26958877	+	NA	NA	NA	NA	NA	NA	T	T	T	T	G	G	T	T	T	T	T	T	T	T	T	T	T	T	T	T	T	T	T	T	T	T	T	T	T	T	T	T	T	T	T	T	T	T	T
AX-94507094	C/T	1A	26960576	+	NA	NA	NA	NA	NA	NA	C	C	C	C	C	C	C	C	C	C	C	C	C	C	C	C	C	C	C	C	C	C	C	C	C	C	C	C	C	C	C	C	C	C	C	C	C	C	C
AX-179561307	G/A	1A	26960753	+	NA	NA	NA	NA	NA	NA	G	G	G	G	A	A	G	G	G	G	G	G	G	G	G	G	G	G	G	G	G	G	G	G	G	G	G	G	G	G	G	G	G	G	G	G	G	G	G
AX-95629106	G/A	1A	26960753	+	NA	NA	NA	NA	NA	NA	G	G	G	G	A	A	G	G	G	G	G	G	G	G	G	G	G	G	G	G	G	G	G	G	G	G	G	G	G	G	G	G	G	G	G	G	G	G	R
AX-94446043	C/T	1A	26969276	+	NA	NA	NA	NA	NA	NA	C	C	C	C	Y	Y	C	C	C	C	C	C	C	C	C	C	C	C	C	C	C	C	C	C	C	C	C	C	C	C	C	C	C	C	C	C	C	C	C
AX-111476220	C/T	1A	27131951	+	NA	NA	NA	NA	NA	NA	C	C	C	C	T	T	C	C	C	C	C	C	C	C	C	C	C	C	C	C	C	C	C	C	C	C	C	C	C	C	C	C	C	C	C	C	C	C	C
AX-110975901	G/A	1A	27243311	+	NA	NA	NA	NA	NA	NA	G	G	G	G	G	G	G	G	G	G	A	A	G	A	A	G	G	G	G	G	G	G	G	G	G	G	G	A	G	G	G	G	G	G	A	G	G	A	A
AX-109432280	G/A	1A	27243380	+	NA	NA	NA	NA	NA	NA	G	G	G	G	G	G	G	G	G	G	A	A	G	A	A	G	G	G	G	G	G	G	G	G	G	G	G	A	G	G	G	G	G	G	A	G	G	A	A
AX-179559920	A/G	1A	27253549	+	NA	NA	NA	NA	NA	NA	A	A	A	A	G	G	A	A	A	A	A	A	A	A	A	A	A	A	A	A	A	A	A	A	A	A	A	A	A	A	A	A	A	A	A	A	A	A	A
AX-95634520	A/G	1A	27253549	+	NA	NA	NA	NA	NA	NA	A	A	A	A	G	G	A	A	A	A	A	A	A	A	A	A	A	A	A	A	A	A	A	A	A	A	A	A	A	A	A	A	A	A	A	A	A	A	A
AX-111071692	T/C	1A	27310982	+	NA	NA	NA	NA	NA	NA	T	T	T	T	C	C	T	T	T	T	T	T	T	T	T	T	T	T	T	T	T	T	T	T	T	T	T	T	T	T	T	T	N	T	T	T	T	T	T
AX-109929941	G/A	1A	27357984	+	NA	NA	NA	NA	NA	NA	G	G	A	G	G	G	A	A	A	G	G	G	A	G	G	G	A	A	G	G	G	G	A	A	G	A	A	G	A	A	A	A	R	A	G	A	A	G	G
AX-108738658	G/A	1A	27358073	+	NA	NA	NA	NA	NA	NA	A	A	G	A	A	A	G	G	G	A	G	G	G	G	G	A	G	G	A	A	A	A	G	G	A	G	G	G	G	G	G	G	G	G	G	G	G	G	G
AX-95186852	C/T	1A	27362485	+	NA	NA	NA	NA	NA	NA	C	C	C	C	C	C	C	C	C	C	Y	Y	C	Y	Y	C	C	C	C	C	C	C	C	C	C	C	C	Y	C	C	C	C	C	C	Y	C	C	Y	C
AX-112287774	G/A	1A	27363057	+	NA	NA	NA	NA	NA	NA	G	G	G	G	A	A	N	G	G	G	A	A	G	A	A	G	G	G	G	G	G	G	G	G	G	G	G	A	G	G	G	G	G	G	A	G	G	A	G
AX-95630715	G/A	1A	27363057	+	NA	NA	NA	NA	NA	NA	G	G	G	G	A	A	G	G	G	G	A	A	G	A	A	G	G	G	G	G	G	G	G	G	G	G	G	A	G	G	G	G	G	G	A	G	G	A	G
AX-109438319	G/A	1A	27750882	+	NA	NA	NA	NA	NA	NA	G	G	G	G	A	A	G	G	G	G	A	A	G	A	A	G	G	G	G	G	G	G	G	G	G	G	G	A	G	G	G	G	G	G	A	G	G	A	G
AX-110419378	A/G	1A	28606722	+	NA	NA	NA	NA	NA	NA	G	G	A	G	G	G	A	A	A	G	G	G	A	G	G	G	A	A	G	G	G	G	A	A	G	A	A	G	A	A	A	A	A	A	G	A	A	G	A
AX-179557461	G/A	1A	28611790	+	NA	NA	NA	NA	NA	NA	A	A	G	A	A	A	G	G	G	A	A	A	G	A	A	A	G	G	A	A	A	A	G	G	A	G	G	A	G	G	G	G	G	G	A	G	G	A	G
AX-95072103	T/G	1A	28620424	+	NA	NA	NA	NA	NA	NA	G	G	T	G	G	G	T	T	T	G	G	G	T	G	G	G	T	T	G	G	G	G	T	T	G	T	T	G	T	T	T	T	T	T	G	T	T	G	T
AX-95682347	A/G	1A	28620449	+	NA	NA	NA	NA	NA	NA	G	G	A	G	G	G	A	A	A	G	G	G	A	G	G	G	A	A	G	G	G	G	A	A	G	A	A	G	A	A	A	A	A	A	G	A	A	G	A
AX-178058293	A/G	1A	28620484	+	NA	NA	NA	NA	NA	NA	G	G	A	G	G	G	A	A	A	G	G	G	A	G	G	G	A	A	G	G	G	G	A	A	G	A	A	G	A	A	A	A	A	A	G	A	A	G	A
AX-112286225	A/C	1A	28757899	+	NA	NA	NA	NA	NA	NA	A	A	A	A	C	C	A	A	A	A	C	C	A	C	C	A	A	A	A	A	A	A	A	A	A	A	A	C	A	A	A	A	A	A	C	A	A	C	A
AX-95682702	A/C	1A	28757899	+	NA	NA	NA	NA	NA	NA	A	A	A	A	C	C	A	A	A	A	C	C	A	C	C	A	A	A	A	A	A	A	A	A	A	A	A	C	A	A	A	A	A	A	C	A	A	C	A
AX-111564841	A/G	1A	28941642	+	NA	NA	NA	NA	NA	NA	A	A	A	A	G	G	A	A	A	A	G	G	A	G	G	A	A	A	A	A	A	A	A	A	A	A	A	G	A	A	A	A	A	A	G	A	A	G	N
AX-112286252	T/C	1A	29191079	+	NA	NA	NA	NA	NA	NA	T	T	T	T	T	T	T	T	T	T	T	T	T	T	T	T	T	T	T	T	T	T	T	T	T	T	T	T	T	T	T	T	T	T	T	T	T	T	T
AX-179561771	A/C	1A	29191223	+	NA	NA	NA	NA	NA	NA	A	A	A	C	A	A	A	A	A	A	A	A	A	A	A	A	A	A	C	C	C	C	A	A	C	A	A	A	A	A	A	A	C	A	A	A	A	A	C
AX-95661536	A/C	1A	29191223	+	NA	NA	NA	NA	NA	NA	A	A	A	C	A	A	A	A	A	A	A	A	A	A	A	A	A	A	C	C	C	C	A	A	C	A	A	A	A	A	A	A	C	A	A	A	A	A	C
AX-94843910	T/C	1A	29191532	+	NA	NA	NA	NA	NA	NA	T	T	T	C	T	T	T	T	T	T	T	T	T	T	T	T	T	T	C	C	C	C	T	T	C	T	T	T	T	T	T	T	C	T	T	T	T	T	C
AX-179560971	C/T	1A	29611921	+	NA	NA	NA	NA	NA	NA	C	C	C	T	C	C	C	C	C	C	C	C	C	C	C	C	C	C	T	T	T	T	C	C	T	C	C	C	C	C	C	C	T	C	C	C	C	C	T
AX-94694430	C/T	1A	29611921	+	NA	NA	NA	NA	NA	NA	C	C	C	T	C	C	C	C	C	C	C	C	C	C	C	C	C	C	T	T	T	T	C	C	T	C	C	C	C	C	C	C	T	C	C	C	C	C	T
AX-111015470	A/G	1A	29787383	+	NA	NA	NA	NA	NA	NA	A	A	A	G	A	A	A	A	A	A	A	A	A	A	A	A	A	A	G	G	G	G	A	A	G	A	A	A	A	A	A	A	G	A	A	A	A	A	G
AX-94564492	G/A	1A	29797909	+	NA	NA	NA	NA	NA	NA	G	G	G	G	G	G	G	N	G	G	G	G	G	G	G	G	G	G	G	G	G	G	G	G	G	G	G	G	G	G	G	G	G	G	G	G	G	G	G
AX-94764777	G/A	1A	29797949	+	NA	NA	NA	NA	NA	NA	A	G	G	G	G	G	G	G	G	G	G	G	G	G	G	G	G	G	G	G	G	G	G	G	G	G	A	G	G	G	G	G	G	G	G	G	A	G	G
AX-94804842	T/C	1A	29801475	+	NA	NA	NA	NA	NA	NA	T	T	C	T	C	C	T	T	T	T	T	C	T	C	T	T	T	C	T	T	T	T	C	T	C	C	T	T	T	T	T	T	C	T	T	T	T	C	C
AX-94627776	A/G	1A	30193344	+	NA	NA	NA	NA	NA	NA	R	A	R	G	A	A	A	A	A	A	A	A	A	A	A	A	A	A	G	G	G	G	A	A	G	A	A	A	A	A	A	A	G	A	A	A	A	A	R
AX-111560896	T/C	1A	30333979	+	NA	NA	NA	NA	NA	NA	T	T	T	C	C	C	T	T	T	T	C	C	T	C	C	T	T	T	C	C	C	C	T	T	C	T	T	C	T	T	T	T	C	T	C	T	T	C	T
AX-108759985	G/C	1A	30340883	+	NA	NA	NA	NA	NA	NA	G	G	G	C	C	C	G	G	G	G	C	C	G	C	C	G	G	G	C	C	C	C	G	G	C	G	G	C	G	G	G	G	C	G	C	G	G	C	G
AX-109487586	T/C	1A	30341031	+	NA	NA	NA	NA	NA	NA	T	T	T	C	C	C	T	T	T	T	N	C	T	C	C	T	T	T	C	C	C	C	T	T	C	T	T	C	T	T	T	T	C	T	N	T	T	C	T
AX-108891329	C/A	1A	30405377	+	NA	NA	NA	NA	NA	NA	C	C	C	A	A	A	C	C	C	C	A	A	C	A	A	C	C	C	A	A	A	A	C	C	A	C	C	A	C	C	C	C	A	C	A	C	C	A	C
AX-110362870	G/C	1A	30558603	+	NA	NA	NA	NA	NA	NA	G	G	G	N	C	C	G	G	G	G	C	C	G	S	S	G	G	G	C	C	C	C	G	G	C	G	G	C	G	G	G	G	C	G	C	G	G	C	G
AX-110934450	C/T	1A	30566107	+	NA	NA	NA	NA	NA	NA	C	C	C	T	T	T	C	C	C	C	T	T	C	T	T	C	C	C	T	T	T	T	C	C	T	C	C	T	C	C	C	C	T	C	T	C	C	T	C
AX-111107499	C/T	1A	31394484	+	NA	NA	NA	NA	NA	NA	C	C	C	C	C	C	C	C	C	C	C	C	C	C	C	C	C	C	C	C	C	C	C	C	C	C	C	C	C	C	C	C	T	C	C	C	C	C	T
AX-111613879	C/A	1A	31813382	+	NA	NA	NA	NA	NA	NA	C	C	C	C	C	C	C	C	C	C	C	C	C	C	C	C	C	C	C	C	C	C	C	C	C	C	C	C	C	C	C	C	A	C	C	C	C	C	A
AX-109492724	G/A	1A	31840082	+	NA	NA	NA	NA	NA	NA	G	G	G	G	G	G	G	G	G	G	G	G	G	G	G	G	G	G	G	G	G	G	G	G	G	G	G	G	G	G	G	G	A	G	G	G	G	G	A
AX-110494926	C/T	1A	32085675	+	NA	NA	NA	NA	NA	NA	C	C	C	C	C	C	C	C	C	C	C	C	C	C	C	C	C	C	C	C	C	C	C	C	C	C	C	C	C	C	C	C	T	C	C	C	C	C	T
AX-109473606	C/T	1A	32197797	+	NA	NA	NA	NA	NA	NA	C	C	C	C	C	C	C	C	C	C	C	C	C	C	C	C	C	C	C	C	C	C	C	C	C	C	C	C	C	C	C	C	T	C	C	C	C	C	T
AX-110981055	G/A	1A	32258900	+	NA	NA	NA	NA	NA	NA	G	G	G	G	G	G	G	G	G	G	G	G	G	G	G	G	G	G	G	G	G	G	G	G	G	G	G	G	G	G	G	G	A	G	G	G	G	G	A
AX-110431391	C/G	1A	32277292	+	NA	NA	NA	NA	NA	NA	C	C	C	C	C	C	C	C	C	C	C	C	C	C	C	C	C	C	C	C	C	C	C	C	C	C	C	C	C	C	C	C	N	C	C	C	C	C	S
AX-109957260	C/G	1A	32284721	+	NA	NA	NA	NA	NA	NA	C	C	C	C	C	C	C	C	C	C	C	C	C	C	C	C	C	C	C	C	C	C	C	C	C	C	C	C	C	C	C	C	G	C	C	C	C	C	G
AX-109476672	G/A	1A	32289383	+	NA	NA	NA	NA	NA	NA	G	G	G	G	G	G	G	G	G	G	G	G	G	G	G	G	G	G	G	G	G	G	G	G	G	G	G	G	G	G	G	G	A	G	G	G	G	G	A
AX-109959487	G/A	1A	32291172	+	NA	NA	NA	NA	NA	NA	G	G	G	G	G	G	G	G	G	G	G	G	G	G	G	G	G	G	G	G	G	G	G	G	G	G	G	G	G	G	G	G	A	G	G	G	G	G	A
AX-86172690	T/C	1A	32892931	+	NA	NA	NA	NA	NA	NA	T	T	T	C	C	C	T	T	T	T	C	C	T	C	C	T	T	T	C	C	C	C	T	T	C	T	T	C	T	T	T	T	C	T	C	T	T	C	T
AX-86172692	T/C	1A	32892931	+	NA	NA	NA	NA	NA	NA	T	T	T	C	C	C	T	T	T	T	C	C	T	C	C	T	T	T	C	C	C	C	T	T	C	T	T	C	T	T	T	T	C	T	C	T	T	C	T
AX-109387028	G/A	1A	32939577	+	NA	NA	NA	NA	NA	NA	G	G	G	G	A	A	G	G	G	G	A	A	G	A	A	G	G	G	G	G	G	G	G	G	G	G	G	A	G	G	G	G	A	G	A	G	G	A	G
AX-109912673	C/T	1A	32996146	+	NA	NA	NA	NA	NA	NA	C	C	C	C	T	T	C	C	C	C	T	T	C	T	T	C	C	C	C	C	C	C	C	C	C	C	C	T	C	C	C	C	T	C	T	C	C	T	C
AX-111252152	T/G	1A	33019391	+	NA	NA	NA	NA	NA	NA	T	T	T	T	G	G	T	T	T	T	G	G	T	G	G	T	T	T	T	T	T	T	T	T	T	T	T	G	T	T	T	T	G	T	G	T	T	G	T
AX-95172478	C/G	1A	33022222	+	NA	NA	NA	NA	NA	NA	C	C	C	G	G	G	C	C	C	C	G	G	C	G	G	C	C	C	G	G	G	G	C	C	G	C	C	G	C	C	C	C	G	C	G	C	C	G	G
AX-89414133	T/C	1A	33223376	+	NA	NA	NA	NA	NA	NA	T	T	T	C	T	T	T	T	T	T	T	T	T	T	T	T	T	T	C	C	C	C	T	T	C	T	T	T	T	T	T	T	T	T	T	T	T	T	C
AX-110955956	T/C	1A	33344704	+	NA	NA	NA	NA	NA	NA	T	T	T	C	C	C	T	T	T	T	C	C	T	C	C	T	T	T	T	C	C	C	T	T	N	T	T	C	T	T	T	T	T	T	C	T	T	C	T
AX-109398656	C/T	1A	33362850	+	NA	NA	NA	NA	NA	NA	C	C	C	C	T	T	C	C	C	C	T	T	C	T	T	C	C	C	C	C	C	C	C	C	C	C	C	T	C	C	C	C	C	C	T	C	C	T	C
AX-179560625	C/T	1A	33372421	+	NA	NA	NA	NA	NA	NA	C	C	C	T	T	T	C	C	C	C	T	T	C	T	T	C	C	C	T	T	T	T	C	C	T	C	C	T	C	C	C	C	C	C	T	C	C	T	C
AX-95632080	C/T	1A	33372421	+	NA	NA	NA	NA	NA	NA	C	C	C	T	T	T	C	C	C	C	T	T	C	T	T	C	C	C	T	T	T	T	C	C	T	C	C	T	C	C	C	C	C	C	T	C	C	T	C
AX-176653194	A/G	1A	33373162	+	NA	NA	NA	NA	NA	NA	A	A	A	G	R	R	A	A	A	A	R	R	A	R	R	A	A	A	G	G	G	G	A	A	G	A	A	R	A	A	A	A	A	A	R	A	A	R	A
AX-95679112	A/G	1A	33373162	+	NA	NA	NA	NA	NA	NA	A	A	A	G	G	G	A	A	A	A	G	G	A	G	G	A	A	A	G	G	G	G	A	A	G	A	A	G	A	A	A	A	A	A	G	A	A	G	A
AX-179559519	G/T	1A	33375691	+	NA	NA	NA	NA	NA	NA	G	G	G	T	T	T	G	G	G	G	T	T	G	T	T	G	G	G	T	T	T	T	G	G	T	G	G	T	G	G	G	G	G	G	T	G	G	T	G
AX-86169248	G/T	1A	33375691	+	NA	NA	NA	NA	NA	NA	G	G	G	T	T	T	G	G	G	G	T	T	G	T	T	G	G	G	T	T	T	T	G	G	T	G	G	T	G	G	G	G	G	G	T	G	G	T	G
AX-86165642	G/A	1A	33375779	+	NA	NA	NA	NA	NA	NA	G	G	G	G	G	G	G	G	G	G	G	G	G	G	G	G	G	G	G	G	G	G	G	G	G	G	G	G	G	G	G	G	A	G	G	G	N	G	A
AX-108809490	G/A	1A	33377457	+	NA	NA	NA	NA	NA	NA	G	G	G	A	A	A	G	G	G	G	A	A	G	A	A	G	G	G	A	A	A	A	G	G	A	G	G	A	G	G	G	G	G	G	A	G	G	A	G
AX-94619003	C/T	1A	35542848	+	NA	NA	NA	NA	NA	NA	C	C	C	C	C	C	C	C	C	C	C	C	C	C	C	C	C	C	C	C	C	C	C	C	C	C	C	C	C	C	C	C	C	C	C	C	C	C	C
AX-95121543	G/A	1A	35933242	+	NA	NA	NA	NA	NA	NA	G	G	A	G	A	A	G	G	G	G	G	A	G	A	G	G	A	A	G	G	G	G	G	A	A	A	G	G	G	G	G	G	G	G	G	A	A	A	G
AX-179560380	C/T	1A	35934711	+	NA	NA	NA	NA	NA	NA	C	C	C	T	T	T	C	C	C	C	T	T	C	T	T	C	C	C	T	T	T	T	C	C	T	C	C	T	C	C	C	C	N	C	T	C	C	T	T
AX-95634890	C/T	1A	35934711	+	NA	NA	NA	NA	NA	NA	C	C	C	T	T	T	C	C	C	C	T	T	C	T	T	C	C	C	T	T	T	T	C	C	T	C	C	T	C	C	C	C	C	C	T	C	C	T	T
AX-94675197	A/G	1A	36279078	+	NA	NA	NA	NA	NA	NA	A	A	A	A	A	A	A	A	A	A	A	A	A	A	A	A	A	A	A	A	A	A	A	A	A	A	A	A	A	A	A	A	A	A	A	A	A	A	A
AX-112289473	A/G	1A	36568416	+	NA	NA	NA	NA	NA	NA	A	A	A	A	G	G	A	A	A	A	G	G	A	G	G	A	A	A	A	A	A	A	A	A	A	A	A	G	A	A	A	A	A	A	G	A	A	G	G
AX-95653462	A/G	1A	36568416	+	NA	NA	NA	NA	NA	NA	A	A	A	A	G	G	A	A	A	A	G	G	A	G	G	A	N	A	A	A	A	A	A	A	A	A	A	G	A	A	A	A	A	A	G	A	A	G	G
AX-179475774	A/G	1A	36569350	+	NA	NA	NA	NA	NA	NA	A	A	A	A	G	R	A	A	A	A	G	G	A	G	G	A	A	A	A	A	A	A	A	A	A	A	A	G	A	A	A	A	A	A	G	A	A	G	G
AX-179558500	A/G	1A	36569350	+	NA	NA	NA	NA	NA	NA	A	A	A	A	G	G	A	A	A	A	G	G	A	G	G	A	A	A	A	A	A	A	A	A	A	A	A	G	A	A	A	A	A	A	G	A	A	G	G
AX-112290455	G/T	1A	36569647	+	NA	NA	NA	NA	NA	NA	G	G	G	T	T	T	G	G	G	G	T	T	G	T	T	G	G	G	T	T	T	T	G	G	T	G	G	T	G	G	G	G	G	G	T	G	G	T	T
AX-179560901	G/T	1A	36569647	+	NA	NA	NA	NA	NA	NA	G	G	G	T	T	T	G	G	G	G	T	T	G	T	T	G	G	G	T	T	T	T	G	G	T	G	G	T	G	G	G	G	G	G	T	G	G	T	T
AX-112288902	G/A	1A	37501086	+	NA	NA	NA	NA	NA	NA	G	G	G	N	G	G	G	G	G	G	A	A	G	A	A	G	G	G	N	N	N	N	G	G	N	G	G	A	G	G	G	G	G	G	A	G	G	A	A
AX-94415898	G/A	1A	37501086	+	NA	NA	NA	NA	NA	NA	N	G	G	G	G	G	G	G	G	G	A	A	G	A	A	G	G	G	N	A	A	G	G	G	N	G	G	A	G	G	G	G	G	G	A	G	G	A	A
AX-110416310	A/T	1A	38061684	+	NA	NA	NA	NA	NA	NA	A	A	A	A	A	A	A	A	A	A	T	T	A	T	T	A	A	A	A	A	A	A	A	A	A	A	A	T	A	A	A	A	A	A	T	A	A	T	T
AX-111769036	T/A	1A	38380669	+	NA	NA	NA	NA	NA	NA	T	T	T	A	A	A	T	T	T	T	T	T	T	T	T	T	T	T	A	A	A	A	T	T	A	N	T	T	T	T	T	T	T	T	T	T	T	T	T
AX-111664626	T/C	1A	38729994	+	NA	NA	NA	NA	NA	NA	T	T	T	C	T	T	T	T	T	T	C	C	T	C	C	T	T	T	C	C	C	C	T	T	C	T	T	C	T	T	N	T	T	T	N	T	T	C	C
AX-179558922	T/C	1A	38729994	+	NA	NA	NA	NA	NA	NA	T	T	T	C	T	T	T	T	T	T	C	C	T	C	C	T	T	T	C	C	C	C	T	T	C	T	T	C	T	T	T	T	T	T	C	T	T	C	C
AX-111741040	A/G	1A	38731185	+	NA	NA	NA	NA	NA	NA	A	A	A	A	A	A	A	A	A	A	R	R	A	R	R	A	A	A	A	A	A	A	A	A	A	A	A	R	A	A	A	A	A	A	R	A	A	R	A
AX-109338670	G/A	1A	38734919	+	NA	NA	NA	NA	NA	NA	G	G	G	N	G	G	G	G	G	G	A	A	G	A	A	G	G	G	N	N	N	N	G	G	N	G	G	A	G	G	G	G	G	G	A	G	G	A	A
AX-110961122	G/A	1A	38845234	+	NA	NA	NA	NA	NA	NA	G	G	G	A	G	G	G	G	G	G	A	A	G	A	A	G	G	G	A	A	A	A	G	G	A	G	G	A	G	G	G	G	G	G	A	G	G	A	A
AX-110442306	A/G	1A	38865334	+	NA	NA	NA	NA	NA	NA	A	A	A	G	A	A	A	A	A	A	G	G	A	G	G	A	A	A	G	G	G	G	A	A	G	A	A	G	A	A	A	A	A	A	G	A	A	G	G
AX-110426167	C/G	1A	39070699	+	NA	NA	NA	NA	NA	NA	C	C	C	C	C	C	C	N	C	C	G	G	C	G	G	C	C	C	C	C	C	C	C	C	C	C	C	G	C	C	C	C	C	C	G	C	C	G	G
AX-111513970	G/A	1A	39137794	+	NA	NA	NA	NA	NA	NA	G	G	G	G	G	G	G	G	G	G	A	A	G	A	A	G	G	G	G	G	G	G	G	G	G	G	G	A	G	G	G	G	G	G	A	G	G	A	A
AX-109830325	G/A	1A	39356928	+	NA	NA	NA	NA	NA	NA	G	G	G	A	G	G	G	G	G	G	A	A	G	A	A	G	G	G	A	A	A	A	G	G	A	G	G	A	G	G	G	G	G	G	A	G	G	A	A
AX-94645762	G/A	1A	39407425	+	NA	NA	NA	NA	NA	NA	G	G	G	A	G	G	G	G	G	G	A	A	G	A	A	G	G	G	A	A	A	A	G	G	A	G	G	A	G	G	G	G	G	N	A	G	G	A	A
AX-94982885	T/A	1A	39407763	+	NA	NA	NA	NA	NA	NA	T	T	T	T	A	A	T	T	T	T	T	T	T	T	T	T	T	T	T	T	T	T	T	T	T	T	T	T	T	T	T	T	A	T	T	T	T	T	T
AX-108731693	T/C	1A	39610753	+	NA	NA	NA	NA	NA	NA	T	T	T	C	T	T	T	T	T	T	C	C	T	C	C	T	T	T	C	C	C	C	T	T	C	T	T	C	T	T	T	T	T	T	C	T	T	C	C
AX-108869741	T/C	1A	39648343	+	NA	NA	NA	NA	NA	NA	T	T	T	C	T	T	T	T	T	T	C	C	T	C	C	T	T	T	C	C	C	C	T	T	C	T	T	C	T	T	T	T	T	T	C	T	T	C	C
AX-95095239	T/C	1A	39650908	+	NA	NA	NA	NA	NA	NA	T	T	T	T	T	T	T	T	T	T	T	T	T	T	T	T	T	T	T	T	T	T	T	T	T	T	T	T	T	T	T	T	T	T	T	T	T	T	T
AX-111190232	G/T	1A	39875124	+	NA	NA	NA	NA	NA	NA	G	G	G	G	G	G	G	G	G	G	T	T	G	T	T	G	G	G	G	G	G	G	G	G	G	G	G	T	G	G	G	G	G	G	T	G	G	T	T
AX-109852208	G/A	1A	39875902	+	NA	NA	NA	NA	NA	NA	G	G	G	G	G	G	G	G	G	G	A	A	G	A	A	G	G	G	G	G	G	G	G	G	G	G	G	A	G	G	G	G	G	G	A	G	G	A	A
AX-109889298	C/T	1A	39877314	+	NA	NA	NA	NA	NA	NA	C	C	C	C	C	C	C	C	C	C	T	T	C	T	T	C	C	C	C	C	C	C	C	C	C	C	C	T	C	C	C	C	C	C	T	C	C	T	T
AX-110998153	C/T	1A	39889664	+	NA	NA	NA	NA	NA	NA	C	C	C	T	C	C	C	C	C	C	T	T	C	T	T	C	C	C	T	T	T	T	C	C	T	C	C	T	C	C	C	C	C	C	T	C	C	T	T
AX-108833181	C/T	1A	39895607	+	NA	NA	NA	NA	NA	NA	C	C	C	C	C	C	C	C	C	C	T	T	C	T	T	C	C	C	C	C	C	C	C	C	C	C	C	T	C	C	C	C	C	C	T	C	C	T	T
AX-111057826	T/C	1A	39895895	+	NA	NA	NA	NA	NA	NA	T	T	T	C	T	T	T	T	T	T	C	C	T	C	C	T	T	T	C	C	C	C	T	T	C	T	T	C	T	T	T	T	T	T	C	T	T	C	C
AX-111615602	T/C	1A	40151833	+	NA	NA	NA	NA	NA	NA	T	T	T	C	T	T	T	T	T	T	C	C	T	C	C	T	T	T	C	C	C	C	T	N	C	T	T	C	T	T	T	T	T	T	C	T	T	C	C
AX-109819835	G/C	1A	40496496	+	NA	NA	NA	NA	NA	NA	G	G	G	C	G	G	G	G	G	G	C	C	G	C	C	G	G	G	C	C	C	C	G	G	C	G	G	C	G	G	G	G	G	G	C	G	G	C	C
AX-110016374	T/C	1A	40498587	+	NA	NA	NA	NA	NA	NA	T	T	T	C	T	T	T	T	T	T	C	C	T	C	C	T	T	T	C	C	C	C	T	T	C	T	T	C	T	T	T	T	T	T	C	T	T	C	C
AX-110485993	C/T	1A	40569324	+	NA	NA	NA	NA	NA	NA	C	C	C	C	C	C	C	C	C	C	T	T	C	T	T	C	C	C	C	C	C	C	C	C	C	C	C	T	C	C	C	C	C	C	T	C	C	T	T
AX-110674950	G/T	1A	40902675	+	NA	NA	NA	NA	NA	NA	G	G	G	G	G	G	G	G	G	G	T	T	G	T	T	G	G	G	G	G	G	G	G	G	G	G	G	T	G	G	G	G	G	G	T	G	G	T	T
AX-110393089	C/T	1A	41074089	+	NA	NA	NA	NA	NA	NA	C	C	C	T	C	C	C	C	C	C	T	T	C	T	T	C	C	C	T	T	T	T	C	C	T	C	C	T	C	C	C	C	C	C	T	C	C	T	T
AX-179558006	A/G	1A	41749864	+	NA	NA	NA	NA	NA	NA	R	A	R	A	R	R	R	A	A	A	A	A	A	A	A	A	A	A	A	A	A	A	A	A	A	A	A	A	A	A	A	A	R	A	A	A	A	A	A
AX-95658029	A/G	1A	41749864	+	NA	NA	NA	NA	NA	NA	G	A	G	A	G	G	G	A	A	A	A	A	A	A	A	A	A	A	A	A	A	A	A	A	A	A	A	A	A	A	N	A	G	A	A	A	A	A	A
AX-111231046	C/T	1A	41755075	+	NA	NA	NA	NA	NA	NA	C	C	C	C	C	C	C	C	C	C	T	T	C	T	T	C	C	C	C	C	C	C	C	C	C	C	C	T	C	C	C	C	C	C	T	C	C	T	C
AX-111118394	T/C	1A	41829847	+	NA	NA	NA	NA	NA	NA	T	T	T	T	C	C	T	T	T	T	T	T	T	T	T	T	T	T	T	T	T	T	T	T	T	T	T	T	T	T	T	T	T	T	T	T	T	T	C
AX-94488826	C/T	1A	41830115	+	NA	NA	NA	NA	NA	NA	C	C	C	C	C	C	C	C	C	C	T	T	C	T	T	C	C	C	C	C	C	C	C	C	C	C	C	N	C	C	C	C	C	C	T	C	C	T	C
AX-109823225	G/C	1A	41833395	+	NA	NA	NA	NA	NA	NA	G	G	G	G	C	C	G	G	G	G	G	G	G	G	G	G	G	G	G	G	G	G	G	G	G	G	G	G	G	G	G	G	G	G	G	G	G	G	C
AX-109491435	C/T	1A	41872753	+	NA	NA	NA	NA	NA	NA	C	C	N	C	C	C	C	C	C	C	T	T	C	T	T	C	C	C	C	C	C	C	C	C	C	C	C	T	C	C	C	C	N	C	T	C	C	T	C
AX-109275790	G/A	1A	41905936	+	NA	NA	NA	NA	NA	NA	G	G	G	G	N	N	G	G	G	G	G	G	G	G	G	G	G	G	G	G	G	G	G	G	G	G	G	G	G	G	G	G	G	G	G	G	G	G	A
AX-110555190	G/A	1A	41916355	+	NA	NA	NA	NA	NA	NA	G	G	G	G	G	G	G	G	G	G	A	A	G	A	A	G	G	G	G	G	G	G	G	G	G	G	G	A	G	G	G	G	G	G	A	G	G	A	G
AX-109440537	T/C	1A	42103453	+	NA	NA	NA	NA	NA	NA	T	T	T	T	C	C	T	T	T	T	T	T	T	T	T	T	T	T	T	T	T	T	T	T	T	T	T	T	T	T	T	T	T	T	T	T	T	T	C
AX-109505517	G/A	1A	42106833	+	NA	NA	NA	NA	NA	NA	G	G	G	A	G	G	G	G	G	G	A	A	G	A	A	G	G	G	A	A	A	A	G	G	A	G	G	A	G	G	G	G	G	G	A	G	G	A	G
AX-109411093	T/C	1A	42119302	+	NA	NA	NA	NA	NA	NA	T	T	T	T	C	C	T	T	T	T	T	T	T	T	T	T	T	T	T	T	T	T	T	T	T	T	T	T	T	T	T	T	T	T	T	T	T	T	C
AX-109101747	G/A	1A	42469874	+	NA	NA	NA	NA	NA	NA	G	G	G	G	A	A	G	G	G	G	G	G	G	G	G	G	G	G	G	G	G	G	G	G	G	G	G	G	G	G	G	G	G	G	G	G	G	G	A
AX-110391824	A/C	1A	42524725	+	NA	NA	NA	NA	NA	NA	A	A	A	A	C	C	A	A	A	A	C	C	A	C	C	A	A	A	A	A	A	A	A	A	A	A	A	C	A	A	A	A	A	A	C	A	A	C	C
AX-108740572	G/C	1A	42548960	+	NA	NA	NA	NA	NA	NA	G	G	G	G	C	C	G	G	G	G	C	C	G	C	C	G	G	G	G	G	G	G	G	G	G	G	G	C	G	G	G	G	G	G	C	G	G	C	C
AX-94526630	G/A	1A	42550087	+	NA	NA	NA	NA	NA	NA	G	G	G	G	A	A	G	G	G	G	A	A	G	A	A	G	G	G	G	G	G	G	G	G	G	G	G	A	G	G	G	G	G	G	A	G	G	A	A
AX-108893454	G/A	1A	42605938	+	NA	NA	NA	NA	NA	NA	G	G	G	G	A	A	G	G	G	G	G	G	G	G	G	G	G	G	G	G	G	G	G	G	G	G	G	G	G	G	G	G	G	G	G	G	G	G	G
AX-95237406	T/C	1A	42668076	+	NA	NA	NA	NA	NA	NA	T	T	T	T	C	C	T	T	T	T	C	C	T	C	C	T	T	T	T	T	T	T	T	T	T	T	T	C	T	T	T	T	T	T	C	T	T	C	C
AX-110396408	C/T	1A	44409664	+	NA	NA	NA	NA	NA	NA	C	C	C	C	T	T	C	C	C	C	T	T	C	T	T	C	C	C	C	C	C	C	C	C	C	C	C	T	C	C	C	C	C	C	T	C	C	T	T
AX-94753633	A/G	1A	44410934	+	NA	NA	NA	NA	NA	NA	A	A	A	A	A	A	A	A	A	A	A	A	A	A	A	A	A	A	A	A	A	A	A	A	A	A	A	A	A	A	A	A	A	A	A	A	A	A	A
AX-110711991	T/C	1A	45029810	+	NA	NA	NA	NA	NA	NA	T	T	T	C	T	T	T	T	T	T	T	T	C	T	T	T	T	T	C	C	C	C	T	T	C	T	T	T	T	T	T	T	T	T	T	T	T	T	T
AX-110725117	G/C	1A	45270143	+	NA	NA	NA	NA	NA	NA	G	G	G	C	G	G	G	G	G	G	G	G	C	G	G	G	G	G	C	C	C	C	G	G	C	G	G	G	G	G	G	G	G	G	G	G	G	G	G
AX-109926252	C/T	1A	45489508	+	NA	NA	NA	NA	NA	NA	C	C	C	C	T	T	C	C	C	C	T	T	C	T	T	C	C	C	C	C	C	C	C	C	C	C	C	T	C	C	C	C	C	C	T	C	C	T	T
AX-111696459	A/G	1A	45793537	+	NA	NA	NA	NA	NA	NA	A	A	A	G	A	A	A	A	A	A	A	A	G	A	A	A	A	A	G	G	G	G	A	A	G	A	A	A	A	A	A	A	A	A	A	A	A	A	A
AX-110164971	G/A	1A	45794194	+	NA	NA	NA	NA	NA	NA	G	G	G	A	G	G	G	G	G	G	G	G	A	G	G	G	G	G	A	A	A	A	G	G	A	G	G	G	G	G	G	G	G	G	G	G	G	G	G
AX-179561760	G/A	1A	45794194	+	NA	NA	NA	NA	NA	NA	G	G	G	A	G	G	G	G	G	G	G	G	A	G	G	G	G	G	A	A	A	A	G	G	A	G	G	G	G	G	G	G	G	G	G	G	G	G	G
AX-94829692	G/A	1A	45797333	+	NA	NA	NA	NA	NA	NA	G	G	G	A	G	G	G	G	G	G	G	G	A	G	G	G	G	G	A	A	A	A	G	G	A	G	G	G	G	G	G	G	G	G	G	G	G	G	G
AX-108836252	C/T	1A	46241673	+	NA	NA	NA	NA	NA	NA	C	C	C	C	T	T	C	C	C	C	T	T	C	T	T	C	C	C	C	C	C	C	C	C	C	C	C	T	C	C	C	C	C	C	T	C	C	T	C
AX-110508193	A/G	1A	46245633	+	NA	NA	NA	NA	NA	NA	A	A	A	A	G	G	A	A	A	A	G	G	A	G	G	A	A	A	A	A	A	A	A	A	A	A	A	G	A	A	A	A	A	A	G	A	N	G	A
AX-94416982	C/T	1A	47578129	+	NA	NA	NA	NA	NA	NA	C	C	C	T	T	T	C	C	C	C	T	T	T	T	T	C	C	C	T	T	T	T	C	C	T	C	C	T	C	C	C	C	C	C	T	C	C	T	C
AX-95632192	G/A	1A	47791170	+	NA	NA	NA	NA	NA	NA	G	G	G	A	A	A	G	G	G	G	A	A	A	A	A	G	G	G	A	A	A	A	G	G	A	G	G	A	G	G	G	G	G	G	A	G	G	A	G
AX-111672799	G/A	1A	47791249	+	NA	NA	NA	NA	NA	NA	G	G	G	A	A	A	G	G	G	G	A	A	A	A	A	G	G	G	A	A	A	A	G	G	A	G	G	A	G	G	G	G	G	G	A	G	G	A	G
AX-179561892	G/A	1A	47791249	+	NA	NA	NA	NA	NA	NA	G	G	G	A	A	A	G	G	G	G	A	A	A	A	A	G	G	G	A	A	A	A	G	G	A	G	G	A	G	G	G	G	G	G	A	G	G	A	G
AX-95661354	A/C	1A	48589763	+	NA	NA	NA	NA	NA	NA	A	A	A	A	A	A	A	A	A	A	A	A	A	A	A	A	A	A	A	A	A	A	A	A	A	A	A	A	A	A	A	A	A	A	A	A	A	A	A
AX-108896971	A/C	1A	48590961	+	NA	NA	NA	NA	NA	NA	A	A	A	M	C	C	A	A	A	A	C	C	M	C	C	A	A	A	M	M	M	M	A	A	M	A	A	C	A	A	A	A	A	A	C	A	A	C	A
AX-95681612	A/C	1A	48590961	+	NA	NA	NA	NA	NA	NA	A	A	A	C	C	C	A	A	A	A	C	C	C	C	C	A	A	A	C	C	C	C	A	A	C	A	A	C	A	A	N	A	N	A	C	A	A	C	A
AX-112287804	T/C	1A	48978836	+	NA	NA	NA	NA	NA	NA	T	T	T	T	T	T	T	T	T	T	T	T	T	T	T	T	T	T	T	T	T	T	T	T	T	T	T	T	T	T	T	T	T	T	T	T	T	T	C
AX-179559221	T/C	1A	48978836	+	NA	NA	NA	NA	NA	NA	T	T	T	T	T	T	T	T	T	T	T	T	T	T	T	T	T	T	T	T	T	T	T	T	T	T	T	T	T	T	T	T	T	T	T	T	T	T	C
AX-95682709	G/A	1A	48978899	+	NA	NA	NA	NA	NA	NA	G	G	G	G	G	G	G	G	G	G	G	G	G	G	G	G	G	G	G	G	G	G	G	G	G	G	G	G	G	G	G	G	G	G	G	G	G	G	A
AX-95121620	C/T	1A	48982473	+	NA	NA	NA	NA	NA	NA	N	C	C	C	C	C	C	C	C	C	C	C	C	C	C	C	C	C	C	C	C	C	C	C	C	C	C	C	C	C	C	C	C	C	C	C	C	C	C
AX-95079874	T/C	1A	49150853	+	NA	NA	NA	NA	NA	NA	T	T	T	T	T	T	T	T	T	T	T	T	T	T	T	T	T	T	T	T	T	T	T	T	T	T	T	T	T	T	T	T	T	T	T	T	T	T	T
AX-95659363	A/G	1A	49287733	+	NA	NA	NA	NA	NA	NA	A	A	A	A	A	A	A	A	A	A	A	A	A	A	A	A	A	A	A	A	A	A	A	A	A	A	A	A	A	A	A	A	A	A	A	A	A	A	G
AX-94505680	C/T	1A	49288383	+	NA	NA	NA	NA	NA	NA	C	C	C	C	C	C	C	C	C	C	C	C	C	C	C	C	C	C	C	C	C	C	C	C	C	C	C	C	C	C	C	C	C	C	C	C	C	C	T
AX-94739433	C/T	1A	49526809	+	NA	NA	NA	NA	NA	NA	C	C	C	C	T	T	C	C	C	C	T	T	C	T	T	C	C	C	C	C	C	C	C	C	C	C	C	T	C	C	C	C	C	C	T	C	C	C	T
AX-110971755	T/C	1A	49565802	+	NA	NA	NA	NA	NA	NA	T	T	T	T	C	C	T	T	T	T	C	C	T	C	C	T	T	T	T	T	T	T	T	T	T	T	T	C	T	T	T	T	T	T	C	T	T	T	C
AX-94916468	T/G	1A	50929886	+	NA	NA	NA	NA	NA	NA	T	T	T	T	G	G	T	T	T	T	G	G	T	G	G	T	T	T	T	T	T	T	T	T	T	T	T	G	T	T	T	T	T	T	G	T	T	T	G
AX-110064204	T/C	1A	51678813	+	NA	NA	NA	NA	NA	NA	T	T	T	T	C	C	T	T	T	T	C	C	T	C	C	T	T	T	T	T	T	T	T	T	T	T	T	C	T	T	T	T	T	T	C	T	T	T	C
AX-108986632	T/A	1A	52456870	+	NA	NA	NA	NA	NA	NA	T	T	T	T	A	A	T	T	T	T	A	A	T	A	A	T	T	T	T	T	T	T	T	T	T	T	T	A	T	T	T	T	T	T	A	T	T	T	A
AX-111532060	G/T	1A	52514864	+	NA	NA	NA	NA	NA	NA	G	G	G	G	T	T	G	G	G	G	T	T	G	T	T	G	G	G	G	G	G	G	G	G	G	G	G	T	G	G	G	G	G	G	T	G	G	G	T
AX-111698546	T/A	1A	53454253	+	NA	NA	NA	NA	NA	NA	T	T	T	T	A	A	T	T	T	T	A	A	T	A	A	T	T	T	T	T	T	T	T	T	T	T	T	A	T	T	T	T	T	T	W	T	T	T	A
AX-110945242	G/C	1A	53659451	+	NA	NA	NA	NA	NA	NA	G	G	G	G	C	C	G	G	G	G	C	C	G	C	C	G	G	G	G	G	G	G	G	G	G	G	G	C	G	G	G	G	G	G	C	G	G	G	C
AX-111458863	C/A	1A	53669095	+	NA	NA	NA	NA	NA	NA	C	C	C	C	A	A	C	C	C	C	A	A	C	A	A	C	C	C	C	C	C	C	C	C	C	C	C	A	C	C	C	C	C	C	A	C	C	C	A
AX-94860985	C/T	1A	53677233	+	NA	NA	NA	NA	NA	NA	C	C	C	C	C	C	C	C	C	C	C	C	C	C	C	C	C	C	C	C	C	C	C	C	C	C	C	C	C	C	C	C	C	C	C	C	C	C	C
AX-111744034	C/T	1A	53678386	+	NA	NA	NA	NA	NA	NA	C	C	C	C	N	T	C	C	C	C	T	T	C	T	T	C	C	C	C	C	C	C	N	C	C	C	C	T	C	C	C	C	C	C	T	C	C	C	T
AX-95076011	C/G	1A	53855962	+	NA	NA	NA	NA	NA	NA	C	C	C	C	C	C	C	C	C	C	C	C	C	C	C	C	C	C	C	C	C	C	C	C	C	C	C	C	C	C	C	C	C	C	C	C	C	C	C
AX-95080736	G/A	1A	53897975	+	NA	NA	NA	NA	NA	NA	G	G	G	G	A	A	G	G	R	G	A	A	G	A	A	G	G	G	G	G	G	G	G	G	G	G	G	A	G	G	G	G	G	G	A	G	G	G	A
AX-179476622	T/C	1A	54022478	+	NA	NA	NA	NA	NA	NA	T	T	T	T	C	C	T	T	T	T	C	C	T	C	C	T	T	T	T	T	T	T	T	T	T	T	T	C	T	T	T	T	T	T	C	T	T	T	C
AX-95198220	T/C	1A	54022478	+	NA	NA	NA	NA	NA	NA	T	T	T	T	C	C	T	T	T	T	C	C	T	C	C	T	T	T	T	T	T	T	T	T	T	T	T	C	T	T	T	T	T	T	C	T	T	T	C
AX-94394557	C/T	1A	54075717	+	NA	NA	NA	NA	NA	NA	C	C	C	C	C	C	C	C	C	C	C	C	C	C	C	C	C	C	C	C	C	C	C	C	C	C	C	C	C	C	C	C	C	C	C	C	C	C	C
AX-95211457	C/A	1A	57764471	+	NA	NA	NA	NA	NA	NA	C	C	A	C	A	A	C	C	C	C	C	C	C	C	A	C	C	C	C	M	C	C	A	C	A	C	C	C	A	C	C	A	A	C	C	C	C	A	A
AX-95654297	T/C	1A	57768535	+	NA	NA	NA	NA	NA	NA	T	T	T	T	C	C	T	T	N	T	C	C	T	C	C	T	T	T	T	T	T	T	T	T	T	T	T	C	T	T	T	T	T	T	C	T	T	N	C
AX-95020117	C/T	1A	58702224	+	NA	NA	NA	NA	NA	NA	C	C	C	C	C	C	C	C	C	C	C	C	C	C	C	C	C	C	C	C	C	C	C	C	C	C	C	C	C	C	C	C	C	C	C	C	C	C	C
AX-95652853	A/G	1A	58704133	+	NA	NA	NA	NA	NA	NA	A	A	A	A	A	A	A	A	A	A	A	A	A	A	A	A	A	A	A	A	A	A	A	A	A	A	A	A	A	A	A	A	A	A	A	A	A	A	A
AX-112289388	A/G	1A	58704168	+	NA	NA	NA	NA	NA	NA	A	A	A	A	A	A	A	A	A	A	A	A	A	A	A	A	A	A	A	A	A	A	A	A	A	A	A	A	A	A	A	A	A	A	A	A	A	A	A
AX-94390433	G/T	1A	58751755	+	NA	NA	NA	NA	NA	NA	G	G	G	G	G	G	G	G	G	G	G	G	G	G	G	G	G	G	G	G	G	G	G	G	G	G	G	G	G	G	G	G	G	G	G	G	G	G	G
AX-95162504	A/G	1A	58904196	+	NA	NA	NA	NA	NA	NA	A	A	A	A	A	A	A	A	A	A	A	A	A	A	A	A	A	A	A	A	A	A	A	A	A	A	A	A	A	A	A	A	A	A	A	A	A	A	A
AX-110597400	G/T	1A	60083122	+	NA	NA	NA	NA	NA	NA	G	K	G	G	G	G	K	K	K	G	G	G	G	G	K	G	K	K	G	G	G	G	K	K	G	G	G	G	G	G	N	G	G	G	K	K	K	G	G
AX-94678574	C/T	1A	61382007	+	NA	NA	NA	NA	NA	NA	C	T	C	C	T	T	C	C	C	C	C	C	C	C	C	C	C	T	C	C	C	C	N	C	C	C	C	C	C	C	C	C	C	C	C	C	C	C	C
AX-110967932	C/T	1A	61716582	+	NA	NA	NA	NA	NA	NA	C	C	C	C	T	T	C	C	C	C	C	C	C	C	C	C	C	C	C	C	C	C	C	C	C	C	C	C	C	C	C	C	C	C	C	C	C	C	T
AX-112290510	C/T	1A	62615609	+	NA	NA	NA	NA	NA	NA	C	C	C	C	C	C	C	C	C	C	C	C	C	C	C	C	C	C	C	C	C	C	C	C	C	C	C	C	C	C	C	C	C	C	C	C	C	C	C
AX-94464778	C/A	1A	63295898	+	NA	NA	NA	NA	NA	NA	C	C	C	C	C	C	C	C	C	C	C	C	C	C	C	C	C	C	C	C	C	C	C	C	C	C	C	C	C	C	C	C	A	C	C	C	C	C	C
AX-94433809	G/A	1A	64596475	+	NA	NA	NA	NA	NA	NA	G	G	G	G	G	G	G	G	G	G	G	G	G	G	G	G	G	G	G	G	G	G	G	G	G	G	G	G	G	G	G	G	G	G	G	G	G	G	G
AX-94757616	C/T	1A	64596574	+	NA	NA	NA	NA	NA	NA	C	C	C	C	C	C	C	C	C	C	C	C	C	C	C	C	C	C	C	C	C	C	C	C	C	C	C	C	C	C	C	C	C	C	C	C	C	C	C
AX-179561193	C/T	1A	64597300	+	NA	NA	NA	NA	NA	NA	C	C	C	C	T	T	C	C	C	C	T	T	C	T	T	C	C	C	C	C	C	C	C	C	C	C	C	T	C	C	C	C	C	C	T	C	C	C	T
AX-94981277	C/T	1A	64597300	+	NA	NA	NA	NA	NA	NA	C	C	C	C	T	T	C	C	C	C	T	T	C	T	T	C	C	C	C	C	C	C	C	C	C	C	C	T	C	C	C	C	C	C	T	C	C	C	T
AX-94531255	G/A	1A	64598218	+	NA	NA	NA	NA	NA	NA	G	G	G	G	G	G	G	G	G	G	G	G	G	G	G	G	G	G	G	G	G	G	G	G	G	G	G	G	G	G	G	G	G	G	G	G	G	G	G
AX-179477113	G/A	1A	64693421	+	NA	NA	NA	NA	NA	NA	G	G	A	G	A	A	G	G	G	G	G	G	G	G	A	G	G	G	G	G	G	G	A	G	A	G	G	G	A	G	G	A	N	G	G	G	G	A	A
AX-94409481	G/A	1A	64839615	+	NA	NA	NA	NA	NA	NA	G	G	A	G	A	A	G	G	G	G	G	G	G	G	A	G	G	G	N	G	G	G	A	N	A	G	G	G	A	G	G	A	G	G	G	G	G	A	N
AX-94744655	A/G	1A	65263407	+	NA	NA	NA	NA	NA	NA	A	A	G	A	G	G	A	A	A	A	A	A	A	A	G	A	A	A	A	A	A	A	G	A	G	A	A	A	G	A	A	G	G	A	A	A	A	G	G
AX-94626802	A/C	1A	67469260	+	NA	NA	NA	NA	NA	NA	A	A	A	A	A	A	A	A	A	A	A	A	A	A	A	A	A	A	A	A	A	A	A	A	A	A	A	A	A	A	A	A	A	A	A	A	A	A	A
AX-110906528	G/A	1A	67864921	+	NA	NA	NA	NA	NA	NA	G	G	G	G	A	A	G	G	G	G	A	A	G	A	A	G	G	G	G	G	G	G	G	G	G	G	G	A	G	G	G	G	G	G	A	G	G	G	A
AX-95257185	G/A	1A	68840755	+	NA	NA	NA	NA	NA	NA	G	A	G	G	A	A	A	G	G	G	G	G	G	G	G	G	G	G	G	G	G	N	G	G	G	G	G	G	G	G	G	G	G	G	G	G	G	G	A
AX-86185098	G/A	1A	71087375	+	NA	NA	NA	NA	NA	NA	G	G	G	G	A	A	G	G	G	G	A	A	G	A	A	G	G	G	G	G	G	G	G	G	G	G	G	A	G	G	G	G	G	G	A	G	G	G	A
AX-110954516	A/G	1A	73313041	+	NA	NA	NA	NA	NA	NA	A	A	A	A	G	G	A	A	A	A	G	G	A	G	G	A	A	A	A	A	A	A	A	A	A	A	A	G	A	A	A	A	A	A	G	A	A	A	G
AX-110652842	A/C	1A	76031114	+	NA	NA	NA	NA	NA	NA	A	A	A	A	C	C	A	A	A	A	C	C	A	C	C	A	A	A	A	A	A	A	A	A	A	A	A	C	A	A	A	A	M	A	C	A	A	A	C
AX-179476470	A/C	1A	76031114	+	NA	NA	NA	NA	NA	NA	A	A	A	A	C	C	A	A	A	A	C	C	A	C	C	A	A	A	A	A	A	A	A	A	A	A	A	C	A	A	A	A	A	A	C	A	A	A	C
AX-181481135	A/G	1A	76486926	+	NA	NA	NA	NA	NA	NA	A	A	A	A	G	G	A	A	A	A	G	G	A	G	G	A	A	A	A	A	A	A	A	A	A	A	A	G	A	A	N	A	A	A	G	A	A	A	G
AX-111070423	G/A	1A	76763742	+	NA	NA	NA	NA	NA	NA	G	G	G	G	A	A	G	G	G	G	G	G	G	G	G	G	G	G	G	G	G	G	G	G	G	G	G	G	G	G	G	G	G	G	G	G	G	G	A
AX-94698847	C/T	1A	77063551	+	NA	NA	NA	NA	NA	NA	T	C	C	C	C	C	C	C	C	T	T	N	T	C	C	T	C	T	C	C	C	C	C	C	C	C	C	C	C	C	C	C	C	N	C	C	C	C	C
AX-95184743	C/T	1A	77104138	+	NA	NA	NA	NA	NA	NA	N	C	T	C	T	T	C	C	C	C	C	C	C	C	T	C	C	C	C	C	C	C	T	C	T	C	C	C	T	C	C	T	C	C	C	C	C	T	T
AX-95186684	A/C	1A	77794622	+	NA	NA	NA	NA	NA	NA	A	A	A	A	A	A	C	A	A	A	A	A	A	A	M	A	A	A	A	A	A	M	A	A	A	A	A	A	A	A	A	A	A	C	A	A	A	N	C
AX-94781690	A/C	1A	78547642	+	NA	NA	NA	NA	NA	NA	A	A	A	A	A	A	A	A	A	A	A	A	A	A	A	A	A	A	A	A	A	A	A	A	A	A	A	A	A	A	A	A	C	A	A	A	A	A	A
AX-94941902	C/T	1A	79702696	+	NA	NA	NA	NA	NA	NA	C	C	C	C	N	C	C	C	C	C	C	C	C	C	C	C	C	C	C	C	C	C	C	C	C	C	C	C	C	C	C	C	C	C	C	C	C	C	C
AX-112285857	T/C	1A	82084141	+	NA	NA	NA	NA	NA	NA	T	T	T	T	C	C	T	T	T	T	C	C	T	C	C	T	T	T	T	T	T	T	T	T	T	T	T	C	T	T	T	T	T	T	C	T	T	T	C
AX-179561120	T/C	1A	82084141	+	NA	NA	NA	NA	NA	NA	T	T	T	T	C	C	T	T	T	T	C	C	T	C	C	T	T	T	T	T	T	T	T	T	T	T	T	C	T	T	T	T	T	T	C	T	T	T	C
AX-95630601	A/G	1A	82531597	+	NA	NA	NA	NA	NA	NA	A	A	A	A	A	A	A	A	A	A	A	A	A	A	A	A	A	A	A	A	A	A	A	A	A	A	A	A	A	A	A	A	A	A	A	A	A	A	A
AX-86179704	G/C	1A	82947551	+	NA	NA	NA	NA	NA	NA	G	G	G	G	G	G	G	N	G	G	G	G	G	G	G	G	G	G	G	G	G	G	G	G	G	G	G	G	G	G	G	G	G	G	G	G	G	G	G
AX-94845322	C/T	1A	82947987	+	NA	NA	NA	NA	NA	NA	C	C	C	C	C	C	C	C	C	C	C	C	C	C	C	C	C	C	C	C	C	C	C	C	C	C	C	C	C	C	C	C	C	C	C	C	C	C	C
AX-94571699	C/A	1A	83832654	+	NA	NA	NA	NA	NA	NA	C	C	C	C	C	C	C	C	C	C	C	C	C	C	C	C	C	C	C	C	C	C	C	C	C	C	C	C	C	C	C	C	C	C	C	C	C	C	C
AX-94805209	T/G	1A	84014597	+	NA	NA	NA	NA	NA	NA	T	T	T	T	T	T	T	T	T	T	T	T	T	T	T	T	T	T	T	T	T	T	T	T	T	T	T	T	T	T	T	T	T	T	T	T	T	T	T
AX-95634372	A/G	1A	86645141	+	NA	NA	NA	NA	NA	NA	A	A	A	A	A	A	A	A	A	A	A	A	A	A	A	A	A	A	A	A	A	A	A	A	A	A	A	A	A	A	A	A	A	A	A	A	A	A	A
AX-94767652	G/C	1A	86647250	+	NA	NA	NA	NA	NA	NA	G	G	G	G	G	G	G	G	G	G	G	G	G	G	G	G	G	G	G	G	G	G	G	G	G	G	G	G	G	G	G	G	G	G	G	G	G	G	G
AX-94593042	C/T	1A	86648367	+	NA	NA	NA	NA	NA	NA	C	C	C	C	C	C	C	C	C	C	C	C	C	C	C	C	C	C	C	C	C	C	C	C	C	C	C	C	C	C	C	C	C	C	C	C	C	C	C
AX-95229220	T/C	1A	89443201	+	NA	NA	NA	NA	NA	NA	T	C	T	T	C	T	T	T	Y	T	T	T	T	T	T	T	T	T	T	T	T	T	T	T	T	T	Y	T	T	T	T	T	T	T	T	T	T	T	T
AX-95164640	C/T	1A	91502085	+	NA	NA	NA	NA	NA	NA	C	C	C	C	C	C	C	C	C	C	C	C	C	C	C	C	C	C	C	C	C	C	C	C	C	C	C	C	C	C	C	C	C	C	C	C	C	C	C
AX-95660565	C/T	1A	92565416	+	NA	NA	NA	NA	NA	NA	C	C	C	C	C	C	C	C	C	C	C	C	C	C	C	C	C	C	C	C	C	C	C	C	C	C	C	C	C	C	C	C	C	C	C	C	C	C	C
AX-110020419	G/A	1A	92574091	+	NA	NA	NA	NA	NA	NA	G	G	G	G	A	A	G	G	G	G	A	A	G	A	A	G	G	G	G	G	G	G	G	G	G	G	G	A	G	G	G	G	G	G	A	G	G	G	A
AX-94966746	G/A	1A	92574091	+	NA	NA	NA	NA	NA	NA	G	G	G	G	A	A	G	G	G	G	A	A	G	A	A	G	N	G	G	G	G	G	G	G	G	G	G	A	N	G	G	G	G	G	A	G	G	G	A
AX-95109740	C/T	1A	94120880	+	NA	NA	NA	NA	NA	NA	C	C	C	C	C	C	C	C	C	C	T	T	C	T	T	C	C	C	C	C	C	C	C	C	C	C	C	T	C	C	C	C	C	C	T	C	C	C	C
AX-95660765	C/T	1A	94120880	+	NA	NA	NA	NA	NA	NA	C	C	C	C	C	C	C	C	C	C	T	T	C	T	T	C	C	C	C	C	C	C	C	C	C	C	C	T	C	C	C	C	C	C	T	C	C	C	C
AX-179476121	A/G	1A	95848534	+	NA	NA	NA	NA	NA	NA	A	A	A	A	G	G	A	A	A	A	G	G	A	G	G	A	A	A	A	A	A	A	A	A	A	A	A	G	A	A	A	A	A	A	G	A	A	A	G
AX-94873408	A/G	1A	95848534	+	NA	NA	NA	NA	NA	NA	A	A	A	A	G	G	A	A	A	A	G	G	A	G	G	A	A	A	A	A	A	A	A	A	A	A	A	G	A	A	A	A	A	A	G	A	A	A	G
AX-94458071	G/A	1A	96455106	+	NA	NA	NA	NA	NA	NA	G	G	G	G	G	G	G	G	G	G	G	G	G	G	G	G	G	G	G	G	G	G	G	G	G	G	G	G	G	G	N	G	G	G	G	G	G	G	G
AX-110630819	C/A	1A	96471310	+	NA	NA	NA	NA	NA	NA	C	C	C	C	A	A	C	C	C	C	A	A	C	A	A	C	C	C	C	C	C	C	C	C	C	C	C	A	C	C	C	C	C	C	A	C	C	C	A
AX-94937006	G/T	1A	97809578	+	NA	NA	NA	NA	NA	NA	G	G	K	G	G	G	G	G	G	G	G	G	G	G	G	G	G	G	G	G	G	G	G	G	K	G	G	G	K	G	G	K	K	G	G	G	G	G	G
AX-110988150	G/A	1A	98242794	+	NA	NA	NA	NA	NA	NA	G	G	G	G	G	G	G	G	G	G	G	G	G	G	G	G	G	G	G	G	G	G	G	G	G	G	G	G	G	G	G	G	G	G	G	G	G	G	G
AX-95661443	G/A	1A	98242794	+	NA	NA	NA	NA	NA	NA	G	G	G	G	G	G	G	G	G	G	G	G	G	G	G	G	G	G	G	G	G	G	G	G	G	G	G	G	G	G	G	G	G	G	G	G	G	G	G
AX-111646682	T/C	1A	99235296	+	NA	NA	NA	NA	NA	NA	T	T	T	T	C	C	T	T	T	T	C	C	T	C	C	T	T	T	T	T	T	T	T	T	T	T	T	C	T	T	T	T	T	T	C	T	T	T	C
AX-94768106	T/C	1A	100271554	+	NA	NA	NA	NA	NA	NA	T	T	C	T	C	C	T	T	T	T	T	T	T	T	C	T	T	T	T	T	T	T	C	T	C	T	T	T	C	T	T	C	C	T	T	T	T	C	C
AX-94538854	T/C	1A	100289766	+	NA	NA	NA	NA	NA	NA	T	T	C	T	C	C	T	T	T	T	T	T	T	T	C	T	T	T	T	T	T	T	C	T	C	T	T	T	C	T	T	C	C	T	T	T	T	C	C
AX-109326208	A/G	1A	101107864	+	NA	NA	NA	NA	NA	NA	A	A	A	A	G	G	A	A	A	A	G	G	A	G	G	A	A	A	A	A	A	A	A	A	A	A	A	G	A	A	A	A	A	A	G	A	A	A	G
AX-110988737	C/T	1A	101307133	+	NA	NA	NA	NA	NA	NA	C	C	C	C	T	T	C	C	C	C	T	T	C	T	T	C	C	C	C	C	C	C	C	C	C	C	C	T	C	C	C	C	C	C	T	C	C	C	T
AX-95661676	A/G	1A	101323580	+	NA	NA	NA	NA	NA	NA	A	A	A	A	A	A	A	A	A	A	A	A	A	A	A	A	A	A	A	A	A	A	A	A	A	A	A	A	A	A	A	A	A	A	A	A	A	A	A
AX-94673150	A/G	1A	101380403	+	NA	NA	NA	NA	NA	NA	A	A	A	A	G	G	A	A	A	A	G	G	A	G	G	A	A	A	A	A	A	A	A	A	A	A	A	G	A	A	A	A	A	A	G	A	A	A	G
AX-179557788	A/G	1A	101670445	+	NA	NA	NA	NA	NA	NA	A	A	A	A	G	G	A	A	A	A	G	G	A	G	G	A	A	A	A	A	A	A	A	A	A	A	A	G	A	A	A	A	A	A	G	A	A	A	G
AX-95630392	A/G	1A	101670445	+	NA	NA	NA	NA	NA	NA	A	A	A	A	G	G	A	A	A	A	G	G	A	G	G	A	A	A	A	A	A	A	A	A	A	A	A	G	A	A	A	A	A	A	G	A	A	A	G
AX-110582873	C/A	1A	101674689	+	NA	NA	NA	NA	NA	NA	C	C	C	C	A	A	C	C	C	C	A	A	C	A	A	C	C	C	C	C	C	C	C	C	C	C	C	A	C	C	C	C	C	C	A	C	C	C	A
AX-179560436	A/C	1A	101763979	+	NA	NA	NA	NA	NA	NA	A	A	A	A	C	C	A	A	A	A	C	C	A	C	C	A	A	A	A	A	A	A	A	A	A	A	A	C	A	A	A	A	A	A	C	A	A	A	C
AX-95631971	A/C	1A	101763979	+	NA	NA	NA	NA	NA	NA	A	A	A	A	C	C	A	A	A	A	C	C	A	C	C	A	A	A	A	A	A	A	A	A	A	A	A	C	A	A	A	A	A	A	C	A	A	A	C
AX-111647090	C/T	1A	101766993	+	NA	NA	NA	NA	NA	NA	C	C	C	C	T	T	C	C	C	C	T	T	C	T	T	C	C	C	C	C	C	C	C	C	C	C	C	T	C	C	C	C	C	C	T	C	C	C	T
AX-94704140	G/A	1A	102372111	+	NA	NA	NA	NA	NA	NA	G	G	G	G	A	A	G	G	G	G	A	A	G	A	A	G	G	G	G	G	G	G	G	G	G	G	G	A	G	G	G	G	G	G	A	G	G	G	A
AX-95084600	G/T	1A	103311847	+	NA	NA	NA	NA	NA	NA	G	G	G	G	G	G	G	G	G	G	G	G	G	G	G	G	G	G	G	G	G	G	G	N	G	G	G	G	G	G	G	G	G	G	G	G	G	G	G
AX-94453187	G/A	1A	103316447	+	NA	NA	NA	NA	NA	NA	G	G	G	G	G	G	G	G	G	G	G	G	G	G	N	G	G	G	G	G	G	G	G	G	G	G	G	G	G	G	G	G	G	G	G	G	G	G	G
AX-108829549	A/G	1A	103553755	+	NA	NA	NA	NA	NA	NA	A	R	A	A	G	G	A	A	A	A	G	G	A	G	G	A	A	A	A	A	A	A	A	A	A	A	A	G	R	R	A	A	R	A	G	A	A	N	G
AX-110922075	G/A	1A	103687555	+	NA	NA	NA	NA	NA	NA	G	G	G	G	A	A	G	G	G	G	A	A	G	A	A	G	G	G	G	G	G	G	G	G	G	G	G	A	G	G	G	G	G	G	A	G	G	G	A
AX-110134323	C/T	1A	104007484	+	NA	NA	NA	NA	NA	NA	C	C	C	C	T	T	C	C	C	C	T	T	C	T	T	C	C	C	C	C	C	C	C	C	C	C	C	T	C	C	C	C	C	C	T	C	C	C	T
AX-111065296	T/C	1A	104827244	+	NA	NA	NA	NA	NA	NA	T	T	T	T	C	C	T	T	T	T	C	C	T	C	C	T	T	T	T	T	T	T	T	T	T	T	T	C	T	T	T	T	T	T	C	T	T	T	C
AX-86184056	T/C	1A	104937423	+	NA	NA	NA	NA	NA	NA	T	T	T	T	C	C	T	T	T	T	C	C	T	C	C	T	T	T	T	T	T	T	T	T	T	T	T	C	T	T	T	T	T	T	C	T	T	T	C
AX-86184057	T/C	1A	104937423	+	NA	NA	NA	NA	NA	NA	T	T	T	T	C	C	T	T	T	T	C	C	T	C	C	T	T	T	T	T	T	T	T	T	T	T	T	C	T	T	T	T	T	T	C	T	T	T	C
AX-109514669	A/G	1A	105301263	+	NA	NA	NA	NA	NA	NA	A	A	A	A	G	G	A	A	A	A	G	G	A	G	G	A	A	A	A	A	A	A	A	A	A	A	A	G	A	A	A	A	A	A	G	A	A	A	G
AX-109280345	A/G	1A	105903301	+	NA	NA	NA	NA	NA	NA	A	A	A	A	G	G	A	A	A	A	G	G	A	G	G	A	A	A	A	A	A	A	A	A	A	A	A	G	A	A	A	A	A	A	G	A	A	A	G
AX-111123000	C/T	1A	106833688	+	NA	NA	NA	NA	NA	NA	C	C	C	C	T	T	C	C	C	C	T	T	C	T	T	C	C	C	C	C	C	C	C	C	C	C	C	T	C	C	C	C	C	C	T	C	C	C	T
AX-94518238	G/T	1A	107107574	+	NA	NA	NA	NA	NA	NA	G	G	G	G	T	T	G	G	G	G	G	G	G	G	T	G	G	G	G	G	G	G	T	G	G	G	G	G	G	G	G	T	T	G	G	G	G	T	T
AX-108979912	C/T	1A	107108315	+	NA	NA	NA	NA	NA	NA	C	C	C	C	T	T	C	C	C	C	T	T	C	T	T	C	C	C	C	C	C	C	C	C	C	C	C	T	C	C	C	C	C	C	T	C	C	C	T
AX-94737395	C/T	1A	107108315	+	NA	NA	NA	NA	NA	NA	C	C	C	C	T	T	C	C	C	C	T	T	C	T	T	C	C	C	C	C	C	C	C	C	C	C	C	T	C	C	C	C	C	C	T	C	C	C	T
AX-110550621	T/C	1A	107779255	+	NA	NA	NA	NA	NA	NA	T	T	T	T	C	C	T	T	T	T	C	C	T	C	C	T	T	T	T	T	T	T	T	T	T	T	T	C	T	T	T	T	T	T	C	T	T	T	C
AX-86173457	C/T	1A	108693167	+	NA	NA	NA	NA	NA	NA	C	C	C	C	Y	Y	C	C	C	C	Y	Y	C	Y	Y	C	C	C	C	C	C	C	C	C	C	C	C	Y	C	C	C	C	C	C	Y	C	C	C	Y
AX-86173458	C/T	1A	108693167	+	NA	NA	NA	NA	NA	NA	C	C	C	C	T	T	C	C	C	C	T	T	C	T	T	C	C	C	C	C	C	C	C	C	C	C	C	T	C	C	C	C	C	C	T	C	C	C	T
AX-179559564	C/T	1A	108760708	+	NA	NA	NA	NA	NA	NA	C	C	C	C	T	T	C	C	C	C	T	T	C	T	T	C	C	C	C	C	C	C	C	C	C	C	C	T	C	C	C	C	C	C	T	C	C	C	T
AX-95187439	C/T	1A	108760708	+	NA	NA	NA	NA	NA	NA	C	C	Y	C	T	T	C	C	C	C	T	T	C	T	T	C	C	C	C	C	C	C	C	C	C	C	C	T	C	C	C	C	C	C	T	C	C	C	T
AX-95661532	G/A	1A	108765555	+	NA	NA	NA	NA	NA	NA	G	G	G	G	A	A	G	G	G	G	A	A	G	A	A	G	G	G	G	G	G	G	G	G	G	G	G	A	G	G	G	G	G	G	A	G	G	G	A
AX-110592518	A/G	1A	108798789	+	NA	NA	NA	NA	NA	NA	A	A	A	A	G	G	A	A	A	A	G	G	A	G	G	A	A	A	A	A	A	A	A	A	A	A	A	G	A	A	A	A	A	A	G	A	A	A	G
AX-94912092	T/C	1A	108923691	+	NA	NA	NA	NA	NA	NA	T	T	T	T	C	C	T	T	T	T	C	C	T	C	C	T	T	T	T	T	T	T	T	T	T	T	T	C	T	T	T	T	T	T	C	T	T	T	C
AX-111122596	C/T	1A	109422760	+	NA	NA	NA	NA	NA	NA	C	C	C	C	T	T	C	C	C	C	T	T	C	T	T	C	C	C	C	C	C	C	C	C	C	C	C	T	C	C	C	C	C	C	T	C	C	C	T
AX-110483334	T/C	1A	109983641	+	NA	NA	NA	NA	NA	NA	T	T	T	T	C	C	T	T	T	T	C	C	T	C	C	T	T	T	T	T	T	T	T	T	T	T	T	C	T	T	T	T	T	T	C	T	T	T	C
AX-110562636	G/C	1A	110074030	+	NA	NA	NA	NA	NA	NA	G	G	G	G	C	C	G	G	G	G	C	C	G	C	C	G	G	G	G	G	G	G	G	G	G	G	G	C	G	G	G	G	G	G	C	G	G	G	C
AX-179558626	G/A	1A	111131551	+	NA	NA	NA	NA	NA	NA	G	G	G	G	G	G	G	G	G	G	G	G	G	G	G	G	G	G	G	G	G	G	G	G	G	G	G	G	G	G	G	G	G	G	G	G	G	G	G
AX-94635693	T/C	1A	111151263	+	NA	NA	NA	NA	NA	NA	T	T	T	T	T	T	T	T	T	T	T	T	T	T	T	T	T	T	T	T	T	T	T	T	T	T	T	T	T	T	T	T	T	T	T	T	T	T	T
AX-179476578	T/C	1A	111538183	+	NA	NA	NA	NA	NA	NA	T	T	T	T	C	C	T	T	T	T	C	C	T	C	C	T	T	T	T	T	T	T	T	T	T	T	T	C	T	T	T	T	T	T	C	T	T	T	C
AX-179561685	T/C	1A	111538183	+	NA	NA	NA	NA	NA	NA	T	T	T	T	C	C	T	T	T	T	C	C	T	C	C	T	T	T	T	T	T	T	T	T	T	T	T	C	T	T	T	T	T	T	C	T	T	T	C
AX-94482548	G/A	1A	111788789	+	NA	NA	NA	NA	NA	NA	G	G	G	G	A	A	G	G	G	G	A	A	G	A	A	G	G	G	G	G	G	G	G	G	G	G	G	A	G	G	G	G	G	G	A	G	G	G	A
AX-179476654	G/A	1A	111971422	+	NA	NA	NA	NA	NA	NA	G	G	G	G	A	A	G	G	G	G	A	A	G	A	A	G	G	G	G	G	G	N	G	G	G	G	G	A	G	G	G	G	G	G	A	G	G	N	A
AX-179475466	T/G	1A	111973690	+	NA	NA	NA	NA	NA	NA	T	T	T	T	G	G	T	T	T	T	G	G	T	G	G	T	T	T	T	T	T	T	T	T	T	T	T	G	T	T	T	T	T	T	G	T	T	T	G
AX-94971752	T/G	1A	111973690	+	NA	NA	NA	NA	NA	NA	T	T	T	T	K	K	T	T	T	T	K	G	T	G	N	T	T	T	T	T	T	T	T	T	T	T	T	G	T	T	T	T	T	T	G	T	T	T	G
AX-94596860	G/T	1A	112036438	+	NA	NA	NA	NA	NA	NA	G	G	G	G	G	G	G	G	G	G	G	G	G	G	G	G	G	G	G	G	G	G	G	G	G	G	G	G	G	G	G	G	G	G	G	G	G	G	G
AX-94934504	C/A	1A	112203872	+	NA	NA	NA	NA	NA	NA	C	C	C	C	A	A	C	C	C	C	A	A	C	A	A	C	C	C	C	C	C	C	C	C	C	C	C	A	C	C	C	C	N	C	A	C	C	C	A
AX-110942136	C/G	1A	112482100	+	NA	NA	NA	NA	NA	NA	C	C	C	C	G	G	C	C	C	C	G	G	C	G	G	C	C	C	C	C	C	C	C	C	C	C	C	G	C	C	C	C	C	C	G	C	C	C	G
AX-179561714	G/A	1A	112827114	+	NA	NA	NA	NA	NA	NA	G	G	G	G	A	A	G	G	G	G	A	A	G	A	A	G	G	G	G	G	G	G	G	G	G	G	G	A	G	G	G	G	G	G	A	G	G	G	A
AX-95658061	G/A	1A	112827114	+	NA	NA	NA	NA	NA	NA	G	G	G	G	A	A	G	G	G	G	A	A	G	A	A	G	G	G	G	G	G	G	G	G	G	G	G	A	G	G	G	G	G	G	A	G	G	G	A
AX-109869072	G/T	1A	113141645	+	NA	NA	NA	NA	NA	NA	G	G	G	G	T	T	G	G	G	G	T	T	G	T	T	G	G	G	G	G	G	G	G	G	G	G	G	T	G	G	G	G	G	G	T	G	G	G	T
AX-111699997	A/C	1A	113180401	+	NA	NA	NA	NA	NA	NA	A	A	A	A	C	C	A	A	A	A	C	C	A	C	C	A	A	A	A	A	A	A	A	A	A	A	A	C	A	A	A	A	A	A	C	A	A	A	C
AX-110424185	G/A	1A	113695416	+	NA	NA	NA	NA	NA	NA	N	G	G	G	A	A	G	G	G	G	A	A	G	A	A	G	G	G	G	G	G	G	G	G	G	G	G	A	G	G	G	G	G	G	A	G	G	G	A
AX-112287584	A/G	1A	113857897	+	NA	NA	NA	NA	NA	NA	A	A	A	A	G	G	A	A	A	A	G	G	A	G	G	A	A	A	A	A	A	A	A	A	A	A	A	G	A	A	A	A	A	A	G	A	A	A	G
AX-95630497	A/G	1A	113857897	+	NA	NA	NA	NA	NA	NA	A	A	A	A	G	G	A	A	A	A	G	G	A	G	G	A	A	A	A	A	A	A	A	A	A	A	A	G	A	A	A	A	A	A	G	A	A	A	G
AX-95630462	C/T	1A	113860349	+	NA	NA	NA	NA	NA	NA	C	C	C	C	C	C	C	C	C	C	T	T	C	T	T	C	C	C	C	C	C	C	C	C	C	C	C	T	C	C	C	C	C	C	T	C	C	C	C
AX-109985886	G/C	1A	114542884	+	NA	NA	NA	NA	NA	NA	G	G	G	G	C	C	G	G	G	G	C	C	G	C	C	G	G	G	G	G	G	G	G	G	G	G	G	C	G	G	G	G	G	G	C	G	G	G	C
AX-111711625	T/C	1A	114545847	+	NA	NA	NA	NA	NA	NA	T	T	T	T	C	C	T	T	T	T	C	C	T	C	C	T	T	T	T	T	T	T	T	T	T	T	T	C	T	T	T	T	T	T	C	T	T	T	C
AX-110546253	C/A	1A	115359214	+	NA	NA	NA	NA	NA	NA	C	C	C	C	A	A	C	C	C	C	A	A	C	A	A	C	C	C	C	C	C	C	C	C	C	C	C	A	C	C	C	C	C	C	A	C	C	C	A
AX-179558664	C/A	1A	115359214	+	NA	NA	NA	NA	NA	NA	C	C	C	C	A	A	C	C	C	C	A	A	C	A	A	C	C	C	C	C	C	C	C	C	C	C	C	A	C	C	C	C	C	C	A	C	C	C	A
AX-94556854	T/C	1A	115359246	+	NA	NA	NA	NA	NA	NA	T	T	T	T	T	T	T	T	T	T	T	T	T	T	T	T	T	T	T	T	T	T	T	T	T	T	T	T	T	T	T	T	T	T	T	T	T	T	T
AX-94716299	T/C	1A	117808277	+	NA	NA	NA	NA	NA	NA	T	T	T	T	C	C	T	T	T	T	C	C	T	C	C	T	T	T	T	T	T	T	T	T	T	T	T	C	T	T	T	T	T	T	C	T	T	T	C
AX-95629980	T/C	1A	117808277	+	NA	NA	NA	NA	NA	NA	T	T	T	T	C	C	T	T	T	T	C	C	T	C	C	T	T	T	T	T	T	T	T	T	T	T	T	N	T	T	T	T	T	T	C	T	T	T	C
AX-111604778	T/C	1A	118225603	+	NA	NA	NA	NA	NA	NA	T	T	T	T	C	C	T	T	T	T	C	C	T	C	C	T	T	T	T	T	T	T	T	T	T	T	T	C	T	T	T	T	T	T	C	T	T	T	C
AX-94435812	C/T	1A	118290157	+	NA	NA	NA	NA	NA	NA	C	C	C	C	T	T	C	C	C	C	T	T	C	T	T	C	C	C	C	C	C	C	C	C	C	C	C	T	C	C	N	C	C	C	T	C	C	C	T
AX-95630123	C/T	1A	118290157	+	NA	NA	NA	NA	NA	NA	C	C	C	C	T	T	C	C	C	C	T	T	C	T	T	C	C	C	C	C	C	C	C	C	C	C	C	T	C	C	C	C	C	C	T	C	C	C	T
AX-95652827	T/G	1A	118290380	+	NA	NA	NA	NA	NA	NA	T	T	T	T	G	G	T	T	T	T	G	G	T	G	G	T	T	T	T	T	T	T	T	T	T	T	T	G	T	T	T	T	T	T	G	T	T	T	G
AX-110574139	T/C	1A	118502958	+	NA	NA	NA	NA	NA	NA	T	T	T	T	C	C	T	T	T	T	C	C	T	C	C	T	T	T	T	T	T	T	T	T	T	T	T	C	T	T	T	T	T	T	C	T	T	T	C
AX-94995394	G/T	1A	118811247	+	NA	NA	NA	NA	NA	NA	G	G	G	G	G	G	G	G	G	G	G	G	G	G	G	G	G	G	G	G	G	G	G	G	G	G	G	G	G	G	G	G	G	G	G	G	G	G	G
AX-95678907	T/C	1A	119150121	+	NA	NA	NA	NA	NA	NA	T	T	T	T	T	T	T	T	T	T	T	T	T	T	T	T	T	T	T	T	T	T	T	T	T	T	T	T	T	T	T	T	T	T	T	T	T	T	T
AX-94460543	T/A	1A	119496869	+	NA	NA	NA	NA	NA	NA	N	T	N	N	A	A	N	T	T	T	A	A	T	N	A	T	T	T	T	T	T	T	T	T	T	T	T	A	T	T	T	T	T	T	A	T	T	T	A
AX-95095578	G/T	1A	120003449	+	NA	NA	NA	NA	NA	NA	G	G	G	G	T	T	G	G	G	G	T	T	G	T	T	G	G	G	G	G	G	G	G	G	G	G	G	T	G	G	G	G	G	G	T	G	G	G	T
AX-179476988	T/G	1A	120010272	+	NA	NA	NA	NA	NA	NA	T	T	T	T	T	T	T	T	T	T	T	T	T	T	T	T	T	T	T	T	T	T	T	T	T	T	T	T	T	T	T	T	T	T	T	T	T	T	T
AX-86165256	T/C	1A	120010546	+	NA	NA	NA	NA	NA	NA	T	T	T	T	C	C	T	T	T	T	C	C	T	C	C	T	T	T	T	T	T	T	T	T	T	T	T	C	T	T	T	T	T	T	C	T	T	T	C
AX-86165257	T/C	1A	120010546	+	NA	NA	NA	NA	NA	NA	T	T	T	T	C	C	T	T	T	T	C	C	T	C	C	T	T	T	T	T	T	T	T	T	T	T	T	C	T	T	T	N	T	T	C	T	T	T	C
AX-179557575	G/T	1A	120010843	+	NA	NA	NA	NA	NA	NA	G	G	G	G	T	T	G	G	G	G	T	T	G	T	T	G	G	G	G	G	G	G	G	G	G	G	G	T	G	G	G	G	G	G	T	G	G	G	T
AX-94510917	G/T	1A	120010843	+	NA	NA	NA	NA	NA	NA	G	G	G	G	T	T	G	G	G	G	T	T	G	T	T	G	G	G	G	G	G	G	G	G	G	G	G	T	G	G	G	G	G	G	T	G	G	G	T
AX-109506649	C/G	1A	120026444	+	NA	NA	NA	NA	NA	NA	C	C	C	C	G	G	C	C	C	C	G	G	C	G	G	C	C	C	C	C	C	C	C	C	C	C	C	G	C	C	C	C	C	C	G	C	C	C	G
AX-179558910	G/A	1A	121046541	+	NA	NA	NA	NA	NA	NA	G	G	G	G	A	A	G	G	G	G	A	A	G	A	A	G	G	G	G	G	G	G	G	G	G	G	G	A	G	G	G	G	G	G	A	G	G	G	A
AX-95658497	G/A	1A	121046541	+	NA	NA	NA	NA	NA	NA	G	G	G	G	A	A	G	G	G	G	A	A	G	A	A	G	G	G	G	G	G	G	G	G	G	G	G	A	G	G	G	G	G	G	A	G	G	G	A
AX-110592405	G/A	1A	121569519	+	NA	NA	NA	NA	NA	NA	G	G	G	G	A	A	G	G	G	G	A	A	G	A	A	G	G	G	G	G	G	G	G	G	G	G	G	A	G	G	G	G	G	G	A	G	G	G	A
AX-109940096	T/C	1A	122336197	+	NA	NA	NA	NA	NA	NA	T	T	T	T	C	C	T	T	T	T	C	C	T	C	C	T	T	T	T	T	T	T	T	T	T	T	T	C	T	T	T	T	T	T	C	T	T	T	C
AX-111118849	T/C	1A	124498173	+	NA	NA	NA	NA	NA	NA	T	T	T	T	C	C	T	T	T	T	C	C	T	C	C	T	T	T	T	T	T	T	T	T	T	T	T	C	T	T	T	T	T	T	C	T	T	T	C
AX-111549410	T/C	1A	125108010	+	NA	NA	NA	NA	NA	NA	T	T	T	T	C	C	T	T	T	T	C	C	T	C	C	T	T	T	T	T	T	T	T	T	T	T	T	N	T	T	T	T	T	T	C	T	T	T	C
AX-95242117	T/C	1A	125109097	+	NA	NA	NA	NA	NA	NA	T	N	T	T	C	C	T	T	T	T	C	C	T	C	C	T	T	T	T	T	T	T	T	T	T	T	T	C	T	T	T	T	T	T	C	T	T	T	C
AX-111614711	A/G	1A	125626025	+	NA	NA	NA	NA	NA	NA	A	A	A	A	G	G	A	A	A	A	G	G	A	G	G	A	A	A	A	A	A	A	A	A	A	A	A	G	A	A	A	A	A	A	G	A	A	A	G
AX-111456450	G/A	1A	126513587	+	NA	NA	NA	NA	NA	NA	G	G	G	G	A	A	G	G	G	G	A	A	G	A	A	G	G	G	G	G	G	G	G	G	G	G	G	A	G	G	G	G	G	G	A	G	G	G	A
AX-111549875	C/T	1A	126555056	+	NA	NA	NA	NA	NA	NA	C	C	C	C	T	T	C	C	C	C	T	T	C	T	T	C	C	C	C	C	C	C	C	C	C	C	C	T	C	C	C	C	C	C	T	C	C	C	T
AX-94885606	T/C	1A	127075331	+	NA	NA	NA	NA	NA	NA	T	T	T	T	T	T	T	T	T	T	T	T	T	T	T	T	T	T	T	T	T	T	T	T	T	T	T	T	T	T	T	T	T	T	T	T	T	T	T
AX-110439526	C/A	1A	127075701	+	NA	NA	NA	NA	NA	NA	C	C	C	C	A	A	C	C	C	C	A	A	C	A	A	C	C	C	C	C	C	C	C	C	C	C	C	A	C	C	C	C	C	C	A	C	C	C	A
AX-95661636	C/A	1A	127075701	+	NA	NA	NA	NA	NA	NA	C	C	C	C	A	A	C	C	C	C	A	A	C	A	A	C	C	C	C	C	C	C	C	C	C	C	C	A	C	C	C	C	C	C	A	C	C	C	A
AX-179475507	G/T	1A	127076716	+	NA	NA	NA	NA	NA	NA	G	G	G	G	G	G	G	G	G	G	G	G	G	G	G	G	G	G	G	G	G	G	G	G	G	G	G	G	G	G	G	G	G	G	G	G	G	G	G
AX-110068247	G/T	1A	127292525	+	NA	NA	NA	NA	NA	NA	G	G	G	G	T	T	G	G	G	G	T	T	G	T	T	G	G	G	G	G	G	G	G	G	G	G	G	T	G	G	G	G	G	G	T	G	G	G	T
AX-179558336	C/T	1A	129999761	+	NA	NA	NA	NA	NA	NA	C	C	C	C	T	T	C	C	C	C	T	T	C	T	T	C	C	C	C	C	C	C	C	C	C	C	C	T	C	C	C	C	N	C	T	C	C	C	T
AX-95661121	C/T	1A	129999761	+	NA	NA	NA	NA	NA	NA	T	C	C	C	T	T	C	C	C	C	T	T	C	T	T	C	C	C	C	C	C	N	N	C	C	N	C	T	C	C	C	C	C	C	T	C	C	C	T
AX-94599511	C/T	1A	130909637	+	NA	NA	NA	NA	NA	NA	C	C	C	C	C	C	C	C	C	C	C	C	C	C	C	C	C	C	C	C	C	C	C	C	C	C	C	C	C	C	C	C	C	C	C	C	C	C	C
AX-95163141	C/T	1A	131520092	+	NA	NA	NA	NA	NA	NA	C	C	C	C	C	C	C	C	C	C	C	C	C	C	C	C	C	C	C	C	C	C	C	C	C	C	C	C	C	C	C	C	C	C	C	C	C	C	C
AX-94580006	A/G	1A	131520162	+	NA	NA	NA	NA	NA	NA	A	A	A	A	A	A	A	A	A	A	A	A	A	A	A	A	A	A	A	A	A	A	A	A	A	A	A	A	A	A	A	A	A	A	A	A	A	A	A
AX-94916500	G/T	1A	131965471	+	NA	NA	NA	NA	NA	NA	G	G	G	G	G	G	G	G	G	G	G	G	G	G	G	G	G	G	G	G	G	G	G	G	G	G	G	G	G	G	G	G	G	G	G	G	G	G	G
AX-108987011	C/T	1A	132137470	+	NA	NA	NA	NA	NA	NA	C	C	C	C	T	T	C	C	C	C	T	T	C	T	T	C	C	C	C	C	C	C	C	C	C	C	C	T	C	C	C	C	C	C	T	C	C	C	T
AX-112289512	A/C	1A	132414802	+	NA	NA	NA	NA	NA	NA	A	A	A	A	A	A	A	A	A	A	A	A	A	A	A	A	A	A	A	A	A	A	A	A	A	A	A	A	A	A	A	A	A	A	A	A	A	A	A
AX-94897502	G/C	1A	132480636	+	NA	NA	NA	NA	NA	NA	G	G	G	G	C	C	G	G	G	G	C	C	G	C	C	G	G	G	G	G	G	G	G	G	G	G	G	C	G	G	G	G	G	G	C	G	G	G	C
AX-179561535	C/T	1A	132485826	+	NA	NA	NA	NA	NA	NA	C	C	C	C	T	T	C	C	C	C	T	T	C	T	T	C	C	C	C	N	C	C	C	C	C	C	C	T	C	C	C	C	C	C	T	C	C	C	T
AX-95629442	C/T	1A	132485826	+	NA	NA	NA	NA	NA	NA	C	C	C	C	T	T	C	C	C	C	T	T	C	T	T	C	C	C	C	C	C	C	C	C	C	C	C	T	C	C	C	C	C	C	T	C	C	C	T
AX-111064175	G/A	1A	132784415	+	NA	NA	NA	NA	NA	NA	G	G	G	G	A	A	G	G	G	G	A	A	G	A	A	G	G	G	G	G	G	G	G	G	G	G	G	A	G	G	G	G	G	G	A	G	G	G	A
AX-95654183	G/A	1A	132784415	+	NA	NA	NA	NA	NA	NA	G	G	G	G	A	A	G	G	G	G	A	A	G	A	A	G	G	G	G	G	G	G	G	G	G	G	G	A	G	G	G	G	G	G	A	G	G	G	A
AX-94660066	C/T	1A	132785363	+	NA	NA	NA	NA	NA	NA	C	C	C	C	C	C	C	C	C	C	C	C	C	C	C	C	C	C	C	C	C	C	C	C	C	C	C	C	C	C	C	C	C	C	C	C	C	C	C
AX-179557810	T/G	1A	132790821	+	NA	NA	NA	NA	NA	NA	T	T	T	T	G	G	T	T	T	T	G	G	T	G	G	T	T	T	T	T	T	T	T	T	T	T	T	G	T	T	T	T	T	T	G	T	T	T	G
AX-94493474	T/G	1A	132790821	+	NA	NA	NA	NA	NA	NA	T	T	T	T	G	G	T	T	T	T	G	G	T	G	G	T	T	T	T	T	T	T	T	T	T	T	T	G	T	T	T	T	T	T	G	T	T	T	G
AX-95141055	G/A	1A	132798250	+	NA	NA	NA	NA	NA	NA	G	G	G	G	G	G	G	G	G	G	G	G	G	G	G	G	G	G	G	G	G	G	G	G	G	G	G	G	G	G	G	G	G	G	G	G	G	G	G
AX-111263418	A/G	1A	133066236	+	NA	NA	NA	NA	NA	NA	A	A	A	A	G	G	A	A	A	A	G	G	A	G	G	A	A	A	A	A	A	A	A	A	A	A	A	G	A	A	A	A	A	A	G	A	A	A	G
AX-94624330	A/G	1A	134001329	+	NA	NA	NA	NA	NA	NA	A	A	A	A	G	G	A	A	A	A	G	G	A	G	G	A	A	A	A	A	A	A	A	A	A	A	A	G	A	A	A	A	A	A	G	A	A	A	G
AX-110689839	G/A	1A	134044990	+	NA	NA	NA	NA	NA	NA	G	G	G	G	A	A	G	G	G	G	A	A	G	A	A	G	G	G	G	G	G	G	G	G	G	G	G	A	G	G	G	G	G	G	A	G	G	G	A
AX-95684416	G/A	1A	135509453	+	NA	NA	NA	NA	NA	NA	G	G	G	G	A	A	G	G	G	G	A	A	G	A	A	G	G	G	G	G	G	G	G	G	G	G	G	A	G	G	G	G	G	G	A	G	G	G	A
AX-109411184	G/A	1A	135516999	+	NA	NA	NA	NA	NA	NA	G	G	G	G	A	A	G	G	G	G	A	A	G	A	A	G	G	G	G	G	G	G	G	G	G	G	G	A	G	G	G	G	G	G	A	G	G	G	A
AX-86164592	T/C	1A	135968946	+	NA	NA	NA	NA	NA	NA	T	T	T	T	C	C	T	T	T	T	C	C	T	C	C	T	T	T	T	T	T	T	T	T	T	T	T	C	T	T	T	T	T	T	C	T	T	T	C
AX-95069149	G/T	1A	136959415	+	NA	NA	NA	NA	NA	NA	G	G	G	G	G	G	G	G	G	G	G	G	G	G	G	G	G	G	G	G	G	G	G	G	G	G	G	G	G	G	G	G	G	G	G	G	G	G	G
AX-112288961	A/G	1A	136959421	+	NA	NA	NA	NA	NA	NA	A	A	A	A	G	G	A	A	A	A	G	G	A	G	G	A	A	A	A	A	A	A	A	A	A	A	A	G	A	A	A	A	A	A	G	A	A	A	G
AX-179476509	A/G	1A	136959421	+	NA	NA	NA	NA	NA	NA	A	A	A	A	G	G	A	A	A	A	G	G	A	G	G	A	A	A	A	A	A	A	A	A	A	A	A	G	A	A	A	A	A	A	G	A	A	A	G
AX-109983715	C/T	1A	137999776	+	NA	NA	NA	NA	NA	NA	C	C	C	C	T	T	C	C	C	C	T	T	C	T	T	C	C	C	C	C	C	C	C	C	C	C	C	T	C	C	C	C	C	C	T	C	C	C	T
AX-111120968	G/T	1A	138430520	+	NA	NA	NA	NA	NA	NA	K	G	G	G	T	T	K	G	G	G	T	T	G	T	T	G	G	G	G	G	G	G	G	G	G	G	G	T	G	G	G	G	G	G	T	G	G	K	T
AX-95200935	A/C	1A	142101918	+	NA	NA	NA	NA	NA	NA	A	A	A	A	A	A	A	A	A	A	A	A	A	A	A	A	A	A	A	A	A	A	A	A	A	A	A	A	A	A	A	A	A	A	A	A	A	A	A
AX-110835160	A/G	1A	143270511	+	NA	NA	NA	NA	NA	NA	A	A	A	A	G	G	A	A	A	A	G	G	A	G	G	A	A	A	A	A	A	A	A	A	A	A	A	G	A	A	A	A	N	A	G	A	A	A	G
AX-94434525	A/G	1A	143270511	+	NA	NA	NA	NA	NA	NA	A	A	A	A	G	G	A	A	A	A	G	G	A	G	G	A	A	A	A	A	A	A	A	A	A	A	A	G	A	A	A	A	A	A	G	A	A	A	G
AX-109043743	G/T	1A	143291868	+	NA	NA	NA	NA	NA	NA	G	G	G	G	T	T	G	G	G	G	T	T	G	T	T	G	G	G	G	G	G	G	G	G	G	G	G	T	G	G	G	G	G	G	T	G	G	G	T
AX-112287645	T/C	1A	145371716	+	NA	NA	NA	NA	NA	NA	N	T	T	T	C	C	T	T	T	T	C	C	T	C	C	T	T	T	T	T	T	T	T	T	T	T	T	C	T	T	T	T	T	T	C	T	T	T	C
AX-179558652	T/C	1A	145371716	+	NA	NA	NA	NA	NA	NA	T	T	T	T	C	C	T	T	T	T	C	C	T	C	C	T	T	T	T	T	T	T	T	T	T	T	T	C	T	T	T	T	T	T	C	T	T	T	C
AX-109479908	C/T	1A	145442136	+	NA	NA	NA	NA	NA	NA	C	C	C	C	T	T	C	C	C	C	T	T	C	T	T	C	C	C	C	C	C	C	C	C	C	C	C	T	C	C	C	C	C	C	T	C	C	C	T
AX-108974862	T/C	1A	145703714	+	NA	NA	NA	NA	NA	NA	T	T	T	T	C	C	T	T	T	T	C	C	T	C	C	T	T	T	T	T	T	T	T	T	T	T	T	C	T	T	T	T	T	T	C	T	T	T	C
AX-179558950	G/A	1A	146630215	+	NA	NA	NA	NA	NA	NA	G	G	G	G	A	A	G	G	G	G	A	A	G	A	A	G	G	G	G	G	G	G	G	G	G	G	G	A	G	G	N	G	G	G	A	G	G	G	A
AX-95633944	G/A	1A	146630215	+	NA	NA	NA	NA	NA	NA	G	G	G	G	A	A	G	G	G	G	N	N	G	A	A	G	G	G	G	G	G	G	G	G	G	G	G	N	G	G	G	G	G	G	A	G	G	G	A
AX-94645209	C/T	1A	146631351	+	NA	NA	NA	NA	NA	NA	C	C	C	C	C	C	C	C	C	C	C	C	C	C	C	C	C	C	C	C	C	C	C	C	C	C	C	C	C	C	C	C	C	C	C	C	C	C	C
AX-111674408	A/G	1A	146954150	+	NA	NA	NA	NA	NA	NA	A	A	A	A	G	G	A	A	A	A	G	G	A	G	G	A	A	A	A	A	A	A	A	A	A	A	A	G	A	A	A	A	A	A	G	A	A	A	G
AX-95255893	T/C	1A	147678635	+	NA	NA	NA	NA	NA	NA	T	T	T	T	T	T	T	T	T	T	T	T	T	T	T	T	T	T	T	T	T	T	T	T	T	T	T	T	T	T	T	T	T	T	T	T	T	T	T
AX-108999030	C/T	1A	147683716	+	NA	NA	NA	NA	NA	NA	C	C	C	C	T	T	C	C	C	C	T	T	C	T	T	C	C	C	C	C	C	C	C	C	C	C	C	T	C	C	C	C	C	C	T	C	C	C	T
AX-94548892	T/C	1A	148610092	+	NA	NA	NA	NA	NA	NA	T	T	T	T	T	T	T	T	T	T	T	T	T	T	T	T	T	T	T	T	T	T	T	T	T	T	T	T	T	T	T	T	T	T	T	T	T	T	T
AX-86180336	T/C	1A	148744934	+	NA	NA	NA	NA	NA	NA	T	T	T	T	C	C	T	T	T	T	C	C	T	C	C	T	T	T	T	T	T	T	T	T	T	T	T	C	T	T	T	T	T	T	C	T	T	T	C
AX-108820788	G/T	1A	148761897	+	NA	NA	NA	NA	NA	NA	G	G	G	G	T	T	G	G	G	G	T	T	G	T	T	G	G	G	G	G	G	G	G	G	G	G	G	T	G	G	G	G	G	G	T	G	G	G	T
AX-111044540	T/C	1A	149351101	+	NA	NA	NA	NA	NA	NA	T	T	T	T	C	C	T	T	T	T	C	C	T	C	C	T	T	T	T	T	T	T	T	T	T	T	T	C	T	T	T	T	T	T	C	T	T	T	C
AX-94897165	C/G	1A	149510418	+	NA	NA	NA	NA	NA	NA	C	C	G	C	G	G	C	C	C	C	C	C	C	C	G	C	C	C	C	C	C	C	G	C	G	C	C	C	G	C	C	G	G	C	C	C	C	G	G
AX-108889133	T/C	1A	150452878	+	NA	NA	NA	NA	NA	NA	T	T	T	T	C	C	T	T	T	T	C	C	T	C	C	T	T	T	T	T	T	T	T	T	T	T	T	C	T	T	T	T	T	T	C	T	T	T	C
AX-86167305	T/C	1A	150894884	+	NA	NA	NA	NA	NA	NA	T	T	T	T	C	C	T	T	T	T	C	C	T	C	C	T	T	T	T	T	T	T	T	T	T	T	T	C	T	T	T	T	N	T	C	T	T	T	C
AX-86167306	T/C	1A	150894884	+	NA	NA	NA	NA	NA	NA	T	T	T	T	C	C	T	T	T	T	C	C	T	C	C	T	T	T	T	T	T	T	T	T	T	T	T	C	T	T	T	T	T	T	C	T	T	T	C
AX-111066985	T/C	1A	151770728	+	NA	NA	NA	NA	NA	NA	T	T	T	T	C	C	T	T	T	T	C	C	T	C	C	T	T	T	T	T	T	T	T	T	T	T	T	C	T	T	T	T	T	T	C	T	T	T	C
AX-94665889	C/T	1A	151777854	+	NA	NA	NA	NA	NA	NA	C	C	C	C	C	C	C	C	C	C	C	C	C	C	C	C	C	C	C	C	C	C	C	C	C	C	C	C	C	C	Y	C	C	C	C	C	C	C	C
AX-111093204	G/A	1A	152145557	+	NA	NA	NA	NA	NA	NA	G	G	G	G	A	A	G	G	G	G	A	A	G	A	A	G	G	G	G	G	G	G	G	G	G	G	G	A	G	G	G	G	G	G	A	G	G	G	A
AX-109511928	G/T	1A	152411090	+	NA	NA	NA	NA	NA	NA	G	G	G	G	T	T	G	G	G	G	T	T	G	T	T	G	G	G	G	G	G	G	G	G	G	G	G	T	G	G	G	G	G	G	T	G	G	G	T
AX-109565576	G/T	1A	153580049	+	NA	NA	NA	NA	NA	NA	G	G	G	G	T	T	G	G	G	G	T	T	G	T	T	G	G	G	G	G	G	G	G	G	G	G	G	T	G	G	G	G	G	G	T	G	G	G	T
AX-109083824	G/A	1A	154905556	+	NA	NA	NA	NA	NA	NA	G	G	G	G	A	A	G	G	G	G	A	A	G	A	A	G	G	G	G	G	G	G	G	G	G	G	G	A	G	G	G	G	G	G	A	G	G	G	A
AX-179476721	T/C	1A	155080636	+	NA	NA	NA	NA	NA	NA	T	T	T	T	C	C	T	T	T	T	C	C	T	C	C	T	T	T	T	T	T	T	T	T	T	T	T	C	T	T	T	T	T	T	C	T	T	T	C
AX-95683884	G/A	1A	155081758	+	NA	NA	NA	NA	NA	NA	G	G	G	G	A	A	G	G	G	G	A	A	G	A	A	G	G	G	G	G	G	G	G	G	G	G	G	A	G	G	G	G	G	G	A	G	G	G	A
AX-86173025	T/C	1A	155082484	+	NA	NA	NA	NA	NA	NA	T	T	T	T	C	C	T	T	T	T	C	C	T	C	C	T	T	T	T	T	T	N	T	T	T	T	T	C	T	T	T	T	T	T	C	T	T	T	C
AX-110058881	A/G	1A	155143176	+	NA	NA	NA	NA	NA	NA	A	A	A	A	G	G	A	A	A	A	G	G	A	G	G	A	A	A	A	A	A	A	A	A	A	A	A	G	A	A	A	A	A	A	G	A	A	A	G
AX-94445757	A/C	1A	155842482	+	NA	NA	NA	NA	NA	NA	A	A	A	A	A	A	A	A	A	A	A	A	A	A	A	A	A	A	A	A	A	A	A	A	A	A	A	A	A	A	A	A	A	A	A	A	A	A	A
AX-109363703	A/G	1A	158927428	+	NA	NA	NA	NA	NA	NA	A	A	A	A	G	G	A	A	A	A	G	G	A	G	G	A	A	A	A	A	A	A	A	A	A	A	A	G	A	A	A	A	A	A	G	A	A	A	G
AX-111503959	T/C	1A	159837906	+	NA	NA	NA	NA	NA	NA	T	T	T	T	C	C	T	T	T	T	C	C	T	C	C	T	T	T	T	T	T	T	T	T	T	T	T	C	T	T	N	T	T	T	C	T	T	T	C
AX-109307763	A/C	1A	160930991	+	NA	NA	NA	NA	NA	NA	A	A	A	A	C	C	A	A	A	A	C	C	A	C	C	A	A	A	A	A	A	A	A	A	A	A	A	C	A	A	A	A	A	A	C	A	A	A	C
AX-110678504	A/G	1A	161069658	+	NA	NA	NA	NA	NA	NA	A	A	A	A	G	G	A	A	A	A	G	G	A	G	G	A	A	A	A	A	A	A	A	A	A	A	A	G	A	A	A	A	A	A	G	A	A	A	G
AX-110989086	C/A	1A	161137518	+	NA	NA	NA	NA	NA	NA	C	C	C	C	A	A	C	C	C	C	A	A	C	A	A	C	C	C	C	C	C	C	C	C	C	C	C	A	C	C	C	C	C	C	A	C	C	C	A
AX-109989391	T/C	1A	161145691	+	NA	NA	NA	NA	NA	NA	N	T	T	T	C	C	T	T	T	T	C	C	T	C	N	T	T	T	T	T	T	T	T	T	T	T	T	C	T	T	T	T	T	T	C	T	T	T	C
AX-109380415	T/C	1A	161665180	+	NA	NA	NA	NA	NA	NA	T	T	T	T	C	C	T	T	T	T	C	C	T	C	C	T	T	T	T	T	T	T	T	T	T	T	T	C	T	T	T	T	T	T	C	T	T	T	C
AX-95232658	T/C	1A	161671443	+	NA	NA	NA	NA	NA	NA	T	T	T	T	T	T	T	T	T	T	T	T	T	T	T	T	T	T	T	T	T	T	T	T	T	T	T	T	T	T	T	T	T	T	T	T	T	T	T
AX-109631829	C/T	1A	163219096	+	NA	NA	NA	NA	NA	NA	C	C	C	C	T	T	C	N	C	C	T	T	C	T	T	C	C	C	C	C	C	C	C	C	C	C	C	T	C	C	C	C	C	C	T	C	C	C	T
AX-110938079	G/A	1A	163228776	+	NA	NA	NA	NA	NA	NA	G	G	G	G	A	A	G	G	G	G	A	A	G	A	A	G	G	G	G	G	G	G	G	G	G	G	G	A	G	G	G	G	G	G	A	G	G	G	A
AX-112289442	T/G	1A	163393979	+	NA	NA	NA	NA	NA	NA	T	T	T	T	G	G	T	T	T	T	G	G	T	G	G	T	T	T	T	T	T	T	T	T	T	T	T	G	T	T	T	T	T	T	G	T	T	T	G
AX-95679601	T/G	1A	163393979	+	NA	NA	NA	NA	NA	NA	T	T	T	T	G	G	T	T	T	T	G	G	T	G	G	T	T	T	T	T	T	T	T	T	T	T	T	G	T	T	T	T	T	T	G	T	T	T	G
AX-108729517	C/T	1A	165134063	+	NA	NA	NA	NA	NA	NA	C	C	C	C	T	T	C	C	C	C	T	T	C	T	T	C	C	C	C	C	C	C	C	C	C	C	C	T	C	C	C	C	C	C	T	C	C	C	T
AX-94521615	C/A	1A	165172609	+	NA	NA	NA	NA	NA	NA	C	C	C	C	A	A	C	C	C	C	A	A	C	A	A	C	C	C	C	C	C	C	C	C	C	C	C	A	C	C	C	C	C	C	A	C	C	C	A
AX-109511783	G/A	1A	165172799	+	NA	NA	NA	NA	NA	NA	G	G	G	G	A	A	G	G	G	G	A	A	G	A	A	G	G	G	G	G	G	G	G	G	G	G	G	A	G	G	G	G	G	G	A	G	G	G	A
AX-94601275	G/A	1A	165172799	+	NA	NA	NA	NA	NA	NA	G	G	G	G	A	A	G	G	G	G	A	A	G	A	A	G	G	G	G	G	G	G	G	G	G	G	G	A	G	G	G	G	G	G	A	G	G	G	A
AX-111525147	T/C	1A	166322397	+	NA	NA	NA	NA	NA	NA	T	T	T	T	C	C	T	T	T	T	C	C	T	C	C	T	T	T	T	T	T	T	T	T	T	T	T	C	T	T	T	T	T	T	C	T	T	T	C
AX-95634558	T/C	1A	166322397	+	NA	NA	NA	NA	NA	NA	T	T	T	T	C	C	T	T	T	T	C	C	T	C	C	T	T	T	T	T	T	T	T	T	T	T	T	C	T	T	T	T	T	T	C	T	T	T	C
AX-109270203	A/G	1A	166442109	+	NA	NA	NA	NA	NA	NA	A	A	A	A	G	G	A	A	A	A	G	G	A	G	G	A	A	A	A	A	A	A	A	A	A	A	A	G	A	A	A	A	A	A	G	A	A	A	G
AX-109637483	G/A	1A	167767389	+	NA	NA	NA	NA	NA	NA	G	G	G	G	A	A	G	G	G	G	A	A	G	A	A	G	G	G	G	G	G	G	G	G	G	G	G	A	G	G	G	G	G	G	A	G	G	G	A
AX-109006984	C/G	1A	168592293	+	NA	NA	NA	NA	NA	NA	C	C	C	C	G	G	C	C	C	C	G	G	C	G	G	C	C	C	C	C	C	C	C	C	C	C	C	G	C	C	C	C	C	C	G	C	C	C	G
AX-111175951	T/G	1A	169654058	+	NA	NA	NA	NA	NA	NA	T	T	T	T	G	G	T	T	T	T	G	G	T	G	G	T	T	T	T	T	T	T	T	T	T	T	T	G	T	T	T	T	N	T	G	T	T	T	G
AX-179558860	T/G	1A	169654058	+	NA	NA	NA	NA	NA	NA	T	T	T	T	G	G	T	T	T	T	G	G	T	G	G	T	T	T	T	T	T	T	T	T	T	T	T	G	T	T	T	T	T	T	G	T	T	T	G
AX-111811057	G/A	1A	169795860	+	NA	NA	NA	NA	NA	NA	G	G	G	G	A	A	G	G	G	G	A	A	G	A	A	G	G	G	G	G	G	G	G	G	G	G	G	A	G	G	G	G	G	G	A	G	G	G	A
AX-110481112	T/G	1A	170775780	+	NA	NA	NA	NA	NA	NA	T	T	T	T	G	G	T	T	T	T	G	G	T	G	G	T	T	T	T	T	T	T	T	T	T	T	T	G	T	T	T	T	T	T	G	T	T	T	G
AX-111719498	A/T	1A	171008754	+	NA	NA	NA	NA	NA	NA	A	A	A	A	T	T	A	A	A	A	T	T	A	T	T	A	A	A	A	A	A	A	A	A	A	A	A	T	A	A	A	A	A	A	T	A	A	A	T
AX-110643294	T/C	1A	171010541	+	NA	NA	NA	NA	NA	NA	T	T	T	T	C	C	T	T	T	T	C	C	T	C	C	T	T	T	T	T	T	T	T	T	T	T	T	C	T	T	T	T	T	T	C	T	T	T	C
AX-109415621	G/A	1A	171018748	+	NA	NA	NA	NA	NA	NA	G	G	G	G	A	A	G	G	G	G	A	A	G	A	A	G	G	G	G	G	G	G	G	G	G	G	G	A	G	G	G	G	G	G	A	G	G	G	A
AX-109338066	G/A	1A	171023065	+	NA	NA	NA	NA	NA	NA	G	G	G	G	A	A	G	G	G	G	A	A	G	A	A	G	G	G	G	G	G	G	G	G	G	G	G	A	G	G	G	G	G	G	A	G	G	G	A
AX-111559536	G/A	1A	172579075	+	NA	NA	NA	NA	NA	NA	G	R	G	G	G	G	G	G	G	G	R	R	G	G	R	G	G	G	G	G	G	G	G	G	G	G	G	G	G	G	G	G	G	R	G	G	G	G	R
AX-110366293	T/G	1A	172831469	+	NA	NA	NA	NA	NA	NA	T	T	T	T	G	G	T	T	T	T	G	G	T	G	G	T	T	T	T	T	T	T	T	T	T	T	T	G	T	T	T	T	T	T	G	T	T	T	G
AX-109829012	A/G	1A	173649235	+	NA	NA	NA	NA	NA	NA	A	A	A	A	G	G	A	A	A	A	G	G	A	G	G	A	A	A	A	A	A	A	A	A	A	A	A	G	A	A	A	A	A	A	G	A	A	A	G
AX-110382803	C/T	1A	173671160	+	NA	NA	NA	NA	NA	NA	C	C	C	C	T	T	C	C	C	C	T	T	C	T	T	C	C	C	C	C	C	C	C	C	C	C	C	T	C	C	C	C	C	C	T	C	C	C	T
AX-108893516	G/A	1A	173958424	+	NA	NA	NA	NA	NA	NA	G	G	G	G	A	A	G	G	G	G	A	A	G	A	A	G	G	G	G	G	G	G	G	G	G	G	G	A	G	G	G	G	G	G	A	G	G	G	A
AX-108895315	C/T	1A	174288127	+	NA	NA	NA	NA	NA	NA	C	C	C	C	T	T	C	C	C	C	T	T	C	T	T	C	C	C	C	C	C	C	C	C	C	C	C	T	C	C	C	C	C	C	T	C	C	C	T
AX-108868887	C/T	1A	174635304	+	NA	NA	NA	NA	NA	NA	C	C	C	C	T	T	C	C	C	C	T	T	C	T	T	C	C	C	C	C	C	C	C	C	C	C	C	T	C	N	C	C	C	C	T	C	C	C	T
AX-108916271	A/G	1A	175665733	+	NA	NA	NA	NA	NA	NA	A	A	A	A	G	G	A	A	A	A	G	G	A	G	G	A	A	A	A	A	A	A	A	A	A	A	A	G	A	A	A	A	A	A	G	A	A	A	G
AX-179477387	A/G	1A	177481594	+	NA	NA	NA	NA	NA	NA	A	A	A	A	G	G	A	A	A	A	G	G	A	G	G	A	A	A	A	A	A	A	A	A	A	A	A	G	A	A	A	A	A	A	G	A	A	A	G
AX-112288580	T/C	1A	177482585	+	NA	NA	NA	NA	NA	NA	T	T	T	T	C	C	T	T	T	T	C	C	T	C	C	T	T	T	T	T	T	T	T	T	T	T	T	C	T	T	T	T	T	T	C	T	T	T	C
AX-179561217	T/C	1A	177482585	+	NA	NA	NA	NA	NA	NA	T	T	T	T	C	C	T	T	T	T	C	C	T	C	C	T	T	T	T	T	T	T	T	T	T	T	T	C	T	T	T	T	T	T	C	T	T	T	C
AX-110613085	A/G	1A	177718257	+	NA	NA	NA	NA	NA	NA	A	A	A	A	G	G	A	A	A	A	G	G	A	G	G	A	A	A	A	A	A	A	A	A	A	A	A	G	A	A	A	A	A	A	G	A	A	A	G
AX-111286022	T/C	1A	177915775	+	NA	NA	NA	NA	NA	NA	T	T	T	T	C	C	T	T	T	T	C	C	T	C	C	T	T	T	T	T	T	T	T	T	T	T	T	C	T	T	T	T	T	T	C	T	T	T	C
AX-109954566	A/G	1A	180087581	+	NA	NA	NA	NA	NA	NA	A	A	A	A	G	G	A	A	A	A	G	G	A	G	G	A	A	A	A	A	A	A	A	A	A	A	A	G	A	A	A	A	A	A	G	A	A	A	G
AX-111619451	G/A	1A	180423001	+	NA	NA	NA	NA	NA	NA	G	G	G	G	A	A	G	G	G	G	A	A	G	A	A	G	G	G	G	G	G	G	G	G	G	G	G	A	G	G	G	G	G	G	A	G	G	G	A
AX-109379649	C/T	1A	181886251	+	NA	NA	NA	NA	NA	NA	C	C	C	C	T	T	C	C	C	C	T	T	C	T	T	C	C	C	C	C	C	C	C	C	C	C	C	T	C	C	C	C	C	C	T	C	C	C	T
AX-112289750	T/G	1A	182069487	+	NA	NA	NA	NA	NA	NA	T	T	T	T	G	G	T	T	T	T	G	G	T	G	G	T	T	T	T	T	T	T	T	T	T	T	T	G	T	T	T	T	T	T	G	T	T	T	G
AX-179559034	T/G	1A	182069487	+	NA	NA	NA	NA	NA	NA	T	T	T	T	G	G	T	T	T	T	G	G	T	G	G	T	T	T	T	T	T	T	T	T	T	T	T	G	T	T	T	T	T	T	G	T	T	T	G
AX-179477055	A/G	1A	182144426	+	NA	NA	NA	NA	NA	NA	A	A	A	A	G	G	A	A	A	A	G	G	A	G	G	A	A	A	A	A	A	A	A	A	A	A	A	G	A	A	N	A	A	A	G	A	A	A	G
AX-110009746	G/A	1A	182148000	+	NA	NA	NA	NA	NA	NA	G	G	G	G	A	A	G	G	G	G	A	A	G	A	A	G	G	G	G	G	G	G	G	G	G	G	G	A	G	G	G	G	G	G	A	G	G	G	A
AX-112287662	G/A	1A	182176248	+	NA	NA	NA	NA	NA	NA	G	G	G	G	A	A	G	G	N	G	A	A	G	A	A	G	G	G	G	G	G	G	G	G	G	G	G	A	G	G	G	G	G	G	A	G	G	G	A
AX-110164804	T/C	1A	182255365	+	NA	NA	NA	NA	NA	NA	T	T	T	T	C	C	T	T	T	T	C	C	T	C	C	T	T	T	T	T	T	T	T	T	T	T	T	C	T	T	T	T	T	T	C	T	T	T	C
AX-110694258	T/G	1A	182347093	+	NA	NA	NA	NA	NA	NA	T	T	T	T	G	G	T	T	T	T	G	G	T	G	G	T	T	T	T	T	T	T	T	T	T	T	T	G	T	T	T	T	T	T	G	T	T	T	G
AX-111213190	G/A	1A	183231144	+	NA	NA	NA	NA	NA	NA	G	G	G	G	A	A	G	G	G	G	A	A	G	A	A	G	G	G	G	G	G	G	G	G	G	G	G	A	G	G	G	G	G	G	A	G	G	G	A
AX-109487391	C/T	1A	185016615	+	NA	NA	NA	NA	NA	NA	C	C	C	C	T	T	C	C	C	C	T	T	C	T	T	C	C	C	C	C	C	C	C	C	C	C	C	T	C	C	C	C	C	C	T	C	C	C	T
AX-95209088	C/A	1A	185145571	+	NA	NA	NA	NA	NA	NA	C	C	C	N	C	C	C	C	C	C	C	C	C	C	C	C	C	C	C	C	C	C	C	C	C	C	C	C	C	C	C	C	C	C	C	C	C	C	C
AX-111802971	G/A	1A	186533923	+	NA	NA	NA	NA	NA	NA	G	G	G	G	A	A	G	G	G	G	A	A	G	A	A	G	G	G	G	G	G	G	G	G	G	G	G	A	G	G	G	G	G	G	A	G	G	G	A
AX-109460609	C/T	1A	186609245	+	NA	NA	NA	NA	NA	NA	C	C	C	C	T	T	C	C	C	C	T	T	C	T	T	C	C	C	C	C	C	C	C	C	C	C	C	T	C	C	C	C	C	C	T	C	C	C	T
AX-111809296	C/T	1A	186738513	+	NA	NA	NA	NA	NA	NA	C	C	C	C	T	T	C	C	C	C	C	C	C	C	C	C	C	C	C	C	C	C	C	C	C	C	C	C	C	C	C	C	C	C	C	C	C	C	T
AX-111005005	C/G	1A	186865771	+	NA	NA	NA	NA	NA	NA	C	C	C	C	G	G	C	C	C	C	G	G	C	S	G	C	C	C	C	C	C	C	C	C	C	C	C	G	C	C	C	C	C	C	G	C	C	C	G
AX-110036251	C/T	1A	186933022	+	NA	NA	NA	NA	NA	NA	C	N	C	C	T	T	C	C	C	C	T	T	C	T	T	C	C	C	C	C	C	C	C	C	C	C	C	T	C	C	C	C	C	C	T	C	C	C	T
AX-112286398	A/C	1A	186989912	+	NA	NA	NA	NA	NA	NA	A	A	A	A	C	C	A	A	A	A	C	C	A	C	C	A	A	A	A	A	A	A	A	A	A	A	A	C	A	A	A	A	A	A	C	A	A	A	C
AX-179558724	A/C	1A	186989912	+	NA	NA	NA	NA	NA	NA	A	A	A	A	C	C	A	A	A	A	C	C	A	C	C	A	A	A	A	A	A	A	A	A	A	A	A	C	A	A	A	A	A	A	C	A	A	A	C
AX-94594465	C/T	1A	186993391	+	NA	NA	NA	NA	NA	NA	C	C	C	C	T	T	C	C	C	C	T	T	C	T	T	C	C	C	C	C	C	C	C	C	C	C	C	T	C	C	C	C	C	C	T	C	C	C	T
AX-111492368	A/G	1A	187308040	+	NA	NA	NA	NA	NA	NA	A	A	A	N	G	G	A	A	A	A	G	G	A	G	G	A	A	A	A	A	A	A	A	A	A	A	A	G	A	A	A	A	A	A	G	A	A	A	G
AX-94415704	A/G	1A	188223531	+	NA	NA	NA	NA	NA	NA	A	A	A	A	G	G	A	A	A	A	G	G	A	G	G	A	A	A	A	A	A	A	A	A	A	A	A	G	A	A	A	A	A	A	G	A	A	A	G
AX-94511054	G/A	1A	189714387	+	NA	NA	NA	NA	NA	NA	G	G	G	G	G	G	G	G	G	G	G	G	G	G	G	G	G	G	G	G	G	G	G	G	G	G	G	G	G	G	G	G	G	G	G	G	G	G	G
AX-95170825	C/G	1A	197091557	+	NA	NA	NA	NA	NA	NA	C	C	C	C	G	G	C	C	C	C	G	G	C	G	G	C	C	C	C	C	C	C	C	C	C	C	C	G	C	C	C	C	C	C	G	C	C	C	G
AX-111830704	G/C	1A	197123167	+	NA	NA	NA	NA	NA	NA	G	G	G	G	C	C	G	G	G	G	C	C	G	C	C	G	G	G	G	G	G	G	G	G	G	G	G	C	G	G	G	G	G	G	C	G	G	G	C
AX-109974584	C/A	1A	197344946	+	NA	NA	NA	NA	NA	NA	C	C	C	C	A	A	C	C	C	C	A	A	C	A	A	C	C	C	C	C	C	C	C	C	C	C	C	A	C	C	C	C	C	C	A	C	C	C	A
AX-108973273	G/A	1A	201449191	+	NA	NA	NA	NA	NA	NA	G	G	G	G	A	A	G	G	G	G	A	A	G	A	A	G	G	G	G	G	G	G	G	G	G	G	G	A	G	G	G	G	G	G	A	G	G	G	A
AX-86171318	T/C	1A	201744763	+	NA	NA	NA	NA	NA	NA	T	T	T	T	C	C	T	T	T	T	C	C	T	C	C	T	T	T	T	T	T	T	T	T	T	T	Y	C	T	T	T	T	T	T	C	T	T	T	C
AX-111856650	T/C	1A	201746573	+	NA	NA	NA	NA	NA	NA	T	T	T	T	C	C	T	T	T	T	C	C	T	C	C	T	T	T	T	T	T	T	T	T	T	T	T	C	T	T	T	T	T	T	C	T	T	T	C
AX-179561166	T/C	1A	201746573	+	NA	NA	NA	NA	NA	NA	T	T	T	T	C	C	T	T	T	T	C	C	T	C	C	T	T	T	T	T	T	T	T	T	T	T	T	C	T	T	T	T	T	T	C	T	T	T	C
AX-179476725	A/G	1A	203324412	+	NA	NA	NA	NA	NA	NA	A	A	A	A	G	G	A	A	A	A	G	G	A	G	G	A	A	A	A	A	A	A	A	A	A	A	A	G	A	A	A	A	A	A	G	A	A	A	G
AX-109033129	T/C	1A	203629545	+	NA	NA	NA	NA	NA	NA	T	T	T	T	C	C	T	T	T	T	C	C	T	C	C	T	T	T	T	T	T	T	T	T	T	T	T	C	T	T	T	T	Y	T	C	T	T	T	C
AX-86184025	A/G	1A	203807504	+	NA	NA	NA	NA	NA	NA	A	A	A	A	G	G	A	A	A	A	G	G	A	G	G	A	A	A	A	A	A	A	A	A	A	A	A	G	A	A	A	A	A	A	G	A	A	A	R
AX-111055901	A/G	1A	203921714	+	NA	NA	NA	NA	NA	NA	A	A	A	A	G	G	A	A	A	A	G	G	A	G	G	A	A	A	A	A	A	A	A	A	A	A	A	G	A	A	N	A	A	A	G	A	A	A	G
AX-95159518	C/T	1A	204828447	+	NA	NA	NA	NA	NA	NA	C	C	C	C	T	T	C	C	C	C	T	T	C	T	T	C	C	C	C	C	C	C	C	C	C	C	C	T	C	C	C	C	C	C	T	C	C	C	T
AX-94522292	A/G	1A	204828594	+	NA	NA	NA	NA	NA	NA	A	A	A	A	G	G	A	A	A	A	G	G	A	G	G	A	A	A	A	A	A	A	A	A	A	A	A	G	A	A	A	A	A	A	G	A	A	A	G
AX-109608313	C/G	1A	205944362	+	NA	NA	NA	NA	NA	NA	C	C	C	C	G	G	C	C	C	C	G	G	C	G	G	C	C	C	C	C	C	C	C	C	C	C	C	G	C	C	C	C	C	C	G	C	C	C	G
AX-111218406	T/A	1A	207220442	+	NA	NA	NA	NA	NA	NA	T	T	T	T	A	A	T	T	T	T	N	A	T	A	A	T	T	T	T	T	T	T	T	T	T	T	T	A	T	T	T	T	T	T	A	T	T	T	A
AX-108750341	T/C	1A	208194216	+	NA	NA	NA	NA	NA	NA	T	T	T	T	C	C	T	T	T	T	C	C	T	C	C	T	T	T	T	T	T	T	T	T	T	T	T	C	T	T	T	T	T	T	C	T	T	T	C
AX-110962027	A/G	1A	208195554	+	NA	NA	NA	NA	NA	NA	A	A	A	A	G	G	A	A	A	A	G	G	A	G	G	A	A	A	A	A	A	A	A	A	A	A	A	G	A	A	A	A	A	A	G	A	A	A	G
AX-109299772	G/A	1A	208207583	+	NA	NA	NA	NA	NA	NA	G	G	G	G	A	A	G	G	G	G	A	A	G	A	A	G	G	G	G	G	G	G	G	G	G	G	G	A	G	G	G	G	G	G	A	G	G	G	A
AX-95629529	T/C	1A	208208379	+	NA	NA	NA	NA	NA	NA	T	T	T	T	C	C	T	T	T	T	C	C	T	C	C	T	T	T	T	T	T	T	T	T	T	T	T	C	T	T	T	T	T	T	C	T	T	T	C
AX-94962981	C/A	1A	208209636	+	NA	NA	NA	NA	NA	NA	C	C	C	C	A	A	C	C	C	C	A	A	C	N	A	C	C	C	C	C	C	C	C	C	M	C	C	A	C	C	C	C	C	C	A	C	C	C	A
AX-95684196	C/A	1A	208209636	+	NA	NA	NA	NA	NA	NA	C	C	C	C	A	A	C	C	C	C	A	A	C	A	A	C	C	C	C	C	C	C	C	C	C	C	C	A	C	C	C	C	C	C	A	C	C	C	A
AX-94793337	A/G	1A	208725628	+	NA	NA	NA	NA	NA	NA	A	G	A	A	A	A	A	A	A	A	A	A	A	A	A	A	A	A	A	A	A	A	A	A	A	A	A	A	A	A	A	A	A	A	A	A	A	A	G
AX-179476625	G/A	1A	208726926	+	NA	NA	NA	NA	NA	NA	R	G	R	G	A	A	G	G	G	R	A	A	R	A	A	R	G	G	R	R	R	R	R	G	R	R	R	A	R	R	R	G	N	G	A	G	G	G	A
AX-95085503	G/A	1A	208726926	+	NA	NA	NA	NA	NA	NA	G	G	N	G	A	A	G	G	G	G	A	A	G	A	A	G	G	G	G	G	G	G	G	G	G	G	G	A	G	G	G	G	G	G	A	G	G	G	A
AX-86171911	T/C	1A	208913404	+	NA	NA	NA	NA	NA	NA	T	T	T	T	C	C	T	T	T	T	C	C	T	C	C	T	T	T	T	T	T	T	T	T	T	T	T	C	T	T	T	T	T	T	C	T	T	T	C
AX-86171912	T/C	1A	208913404	+	NA	NA	NA	NA	NA	NA	T	Y	T	T	C	C	T	T	N	Y	C	C	N	C	C	T	T	T	T	T	T	T	T	T	T	N	T	C	T	T	N	T	Y	T	C	T	T	T	C
AX-108851566	C/T	1A	209554041	+	NA	NA	NA	NA	NA	NA	C	C	C	C	T	T	C	C	C	C	T	T	C	T	T	C	C	C	C	C	C	C	C	C	C	C	C	T	C	C	C	C	C	C	T	C	C	C	T
AX-94431963	G/A	1A	213903042	+	NA	NA	NA	NA	NA	NA	G	G	G	G	A	A	G	G	G	G	A	A	G	A	A	G	G	G	G	G	G	G	G	G	G	G	G	A	G	G	G	G	G	G	A	G	G	G	A
AX-110065421	C/A	1A	216415143	+	NA	NA	NA	NA	NA	NA	C	C	C	C	A	A	C	C	C	C	A	A	C	A	A	C	C	C	C	C	C	C	C	C	C	C	C	A	C	C	C	C	C	C	A	C	C	C	A
AX-95662086	C/A	1A	216415143	+	NA	NA	NA	NA	NA	NA	C	C	C	C	A	A	C	C	C	C	A	A	C	A	A	C	C	C	C	C	C	C	C	C	C	C	C	A	C	C	C	C	C	C	A	C	C	C	A
AX-110721297	G/T	1A	217349623	+	NA	NA	NA	NA	NA	NA	G	G	G	G	T	T	G	G	G	G	T	T	G	T	T	G	G	G	G	G	G	G	G	G	G	G	G	T	G	G	G	G	G	G	T	G	G	G	T
AX-111077837	G/A	1A	217353717	+	NA	NA	NA	NA	NA	NA	G	G	G	G	A	A	G	G	G	G	A	A	G	A	A	G	G	G	G	G	G	G	G	G	G	G	G	A	G	G	G	G	G	G	A	G	G	G	A
AX-95683974	A/G	1A	217612407	+	NA	NA	NA	NA	NA	NA	A	A	A	A	G	G	A	A	A	A	G	G	A	G	G	A	A	A	A	A	A	A	A	A	A	A	A	G	A	A	A	A	A	A	G	A	A	A	G
AX-94911243	C/G	1A	219364934	+	NA	NA	NA	NA	NA	NA	C	C	C	C	G	G	C	C	C	C	C	C	C	C	C	C	C	C	C	C	C	C	C	C	C	C	C	C	C	C	C	G	C	C	C	C	C	C	G
AX-89419502	T/C	1A	219365217	+	NA	NA	NA	NA	NA	NA	T	C	T	T	T	T	T	T	T	T	C	C	T	C	T	T	T	C	T	T	T	T	T	T	T	T	T	C	T	T	T	T	Y	C	T	T	T	C	T
AX-111159076	T/C	1A	219895810	+	NA	NA	NA	NA	NA	NA	T	T	T	T	C	C	N	T	T	T	C	C	T	C	C	T	T	T	T	T	T	T	T	T	T	T	T	C	T	T	T	T	T	T	C	T	T	T	C
AX-179476493	T/C	1A	219895810	+	NA	NA	NA	NA	NA	NA	T	T	T	T	C	C	T	T	T	T	C	C	T	C	C	T	T	T	T	T	T	T	T	T	T	T	T	C	T	T	T	T	T	T	C	T	T	T	C
AX-111604825	C/T	1A	220784058	+	NA	NA	NA	NA	NA	NA	C	C	C	C	T	T	C	C	C	C	T	T	C	T	T	C	C	C	C	N	C	C	C	C	C	C	C	T	C	C	C	C	C	C	T	C	C	C	T
AX-110175969	G/A	1A	221231655	+	NA	NA	NA	NA	NA	NA	G	G	G	G	A	A	G	G	G	G	A	A	G	A	A	G	G	G	G	G	G	G	G	G	G	G	G	A	G	G	G	G	G	G	A	G	G	G	A
AX-110737697	G/A	1A	221598296	+	NA	NA	NA	NA	NA	NA	G	G	G	G	A	A	G	G	G	G	A	A	G	A	A	G	G	G	G	G	G	G	G	G	G	G	G	A	G	G	G	G	G	G	A	G	G	G	A
AX-94408930	A/G	1A	221795567	+	NA	NA	NA	NA	NA	NA	A	A	A	A	G	G	G	A	A	A	G	G	A	G	G	A	A	A	A	A	A	A	A	A	A	A	A	G	A	A	A	A	A	A	G	A	A	A	G
AX-94405392	C/T	1A	222349072	+	NA	NA	NA	NA	NA	NA	C	C	C	C	C	C	C	C	C	C	C	C	C	C	C	C	C	C	C	C	C	C	C	C	C	C	C	C	C	C	C	C	C	C	C	C	C	C	C
AX-179476663	G/A	1A	222917663	+	NA	NA	NA	NA	NA	NA	G	G	G	G	A	A	G	G	G	G	A	A	G	A	A	G	G	G	G	G	G	G	G	G	G	G	G	A	G	G	G	G	G	G	A	G	G	G	A
AX-95661943	G/A	1A	222917663	+	NA	NA	NA	NA	NA	NA	G	G	G	G	A	A	G	G	G	G	A	A	G	A	A	G	G	G	G	G	G	G	G	G	G	G	G	A	G	G	G	G	G	G	A	G	G	G	A
AX-112288543	T/C	1A	222918217	+	NA	NA	NA	NA	NA	NA	T	T	T	T	C	C	T	T	T	T	C	C	T	C	C	T	T	T	T	T	T	T	T	T	T	T	T	C	T	T	T	T	T	T	C	T	T	T	C
AX-111109611	T/C	1A	223443659	+	NA	NA	NA	NA	NA	NA	T	T	T	T	C	C	T	T	T	T	C	C	T	C	C	T	T	T	T	T	T	T	T	T	T	T	T	C	T	T	T	T	T	T	C	T	T	T	C
AX-110002322	A/G	1A	223460794	+	NA	NA	NA	NA	NA	NA	A	A	A	A	G	G	A	A	A	A	G	G	A	G	G	A	A	A	A	A	A	A	A	A	A	A	A	G	A	A	A	A	A	A	G	A	A	A	G
AX-95632863	G/A	1A	223938186	+	NA	NA	NA	NA	NA	NA	G	G	G	G	A	A	G	G	G	G	A	A	G	A	A	G	G	G	G	G	G	G	G	G	G	G	G	A	G	G	G	G	G	G	A	G	G	G	A
AX-109013490	A/G	1A	223944545	+	NA	NA	NA	NA	NA	NA	A	A	A	A	G	G	A	A	A	A	G	G	A	G	G	A	A	A	A	A	A	A	A	A	A	A	A	G	A	A	A	A	A	A	G	A	A	A	G
AX-108798636	G/A	1A	223946712	+	NA	NA	NA	NA	NA	NA	G	G	G	G	A	A	G	G	G	G	A	A	G	A	A	G	G	G	G	G	G	G	G	G	G	G	G	A	G	G	G	G	G	G	A	G	G	G	A
AX-95099834	G/A	1A	223996242	+	NA	NA	NA	NA	NA	NA	G	G	G	G	A	A	G	G	G	G	A	A	G	A	A	G	G	G	G	G	G	G	G	G	G	G	G	A	G	G	G	G	G	G	A	G	G	G	A
AX-110924002	C/G	1A	224818869	+	NA	NA	NA	NA	NA	NA	C	C	C	C	G	G	C	C	C	C	G	G	C	G	G	C	C	C	C	C	C	C	C	C	C	C	C	G	C	C	C	C	C	C	G	C	C	C	G
AX-86172254	T/C	1A	224826871	+	NA	NA	NA	NA	NA	NA	Y	N	Y	Y	T	T	Y	Y	Y	Y	T	T	Y	T	T	Y	Y	Y	Y	Y	N	Y	Y	Y	Y	Y	Y	T	Y	Y	Y	Y	Y	Y	T	Y	Y	Y	T
AX-179558473	A/G	1A	225512942	+	NA	NA	NA	NA	NA	NA	A	A	A	A	G	G	A	A	A	A	G	G	A	G	G	A	A	A	A	A	A	A	A	A	A	A	A	G	A	A	A	A	A	A	G	A	A	A	G
AX-95633700	A/G	1A	225512942	+	NA	NA	NA	NA	NA	NA	A	A	A	A	G	G	A	A	A	A	G	G	A	G	G	A	A	A	A	A	A	A	A	A	A	A	A	G	A	A	A	A	A	A	G	A	A	A	G
AX-109398109	G/A	1A	226308425	+	NA	NA	NA	NA	NA	NA	G	G	G	G	A	A	G	G	G	G	A	A	G	A	A	G	G	G	G	G	G	G	G	G	G	G	G	A	G	G	G	G	G	G	A	G	G	G	A
AX-111000503	A/T	1A	227257844	+	NA	NA	NA	NA	NA	NA	A	A	A	A	T	T	A	A	A	A	T	T	A	T	T	A	A	A	A	A	A	A	A	A	A	A	A	T	A	A	A	A	A	A	T	A	A	A	T
AX-110157589	A/G	1A	227481029	+	NA	NA	NA	NA	NA	NA	A	A	A	A	G	G	A	A	A	A	G	G	A	G	G	A	A	A	A	A	A	A	A	A	A	A	A	G	A	A	A	A	A	A	G	A	A	A	G
AX-110586734	C/T	1A	228105651	+	NA	NA	NA	NA	NA	NA	C	C	C	C	T	T	C	C	C	C	T	T	C	T	T	C	C	C	C	C	C	C	C	C	C	C	C	T	C	C	C	C	C	C	T	C	C	C	T
AX-109396298	G/A	1A	228770550	+	NA	NA	NA	NA	NA	NA	G	G	G	G	A	A	G	G	G	N	A	A	G	A	A	G	G	G	G	G	R	G	G	G	G	N	G	A	G	G	G	G	N	N	A	G	G	G	A
AX-110410722	G/A	1A	229157341	+	NA	NA	NA	NA	NA	NA	G	G	G	G	A	A	G	G	G	G	A	A	G	A	A	G	G	G	G	G	G	G	G	G	G	G	G	A	G	G	G	G	R	G	A	G	G	G	A
AX-111524633	T/C	1A	229272363	+	NA	NA	NA	NA	NA	NA	T	T	T	T	C	C	T	T	T	T	C	C	T	C	C	T	T	T	T	T	T	T	T	T	T	T	T	C	T	T	T	T	T	T	C	T	T	T	C
AX-110396848	C/T	1A	229691779	+	NA	NA	NA	NA	NA	NA	C	C	C	C	T	T	C	C	C	C	T	T	C	T	T	C	C	C	C	C	C	C	C	C	C	C	C	T	C	C	C	C	C	C	T	C	C	C	T
AX-111568418	G/A	1A	230650076	+	NA	NA	NA	NA	NA	NA	G	G	G	G	A	A	G	G	G	G	A	A	G	A	A	G	G	G	G	G	G	G	G	G	G	G	G	A	G	G	G	G	G	G	A	G	G	G	A
AX-179561177	A/G	1A	232073788	+	NA	NA	NA	NA	NA	NA	A	A	A	A	G	G	A	A	A	A	G	G	A	G	G	A	A	A	A	A	A	A	A	A	A	A	A	G	A	A	A	A	A	A	G	A	A	A	G
AX-95683835	A/G	1A	232073788	+	NA	NA	NA	NA	NA	NA	A	A	A	A	G	G	A	A	A	A	G	G	A	G	G	A	A	A	R	A	A	N	A	A	A	A	A	G	A	A	A	A	A	A	G	A	A	A	G
AX-94520045	C/T	1A	232345657	+	NA	NA	NA	NA	NA	NA	C	C	C	C	T	T	C	C	C	C	T	T	C	T	T	C	C	C	C	C	C	C	C	C	C	C	C	T	C	C	C	C	C	C	T	C	C	C	T
AX-179560276	C/A	1A	232606183	+	NA	NA	NA	NA	NA	NA	C	C	C	C	A	A	C	C	C	C	A	A	C	A	A	C	C	C	C	C	C	C	C	C	C	C	C	A	C	C	C	C	C	C	A	C	C	C	A
AX-95662265	C/A	1A	232606183	+	NA	NA	NA	NA	NA	NA	C	C	C	C	A	A	C	C	C	C	A	A	C	A	A	C	C	C	C	C	C	C	C	C	C	C	C	A	C	C	C	C	C	C	A	C	C	C	A
AX-95226312	C/T	1A	233921831	+	NA	NA	NA	NA	NA	NA	C	C	C	C	T	T	C	C	C	C	T	T	C	T	T	C	C	C	C	C	C	C	C	C	C	C	C	T	C	C	C	C	C	C	T	C	C	C	T
AX-95685170	C/T	1A	233921831	+	NA	NA	NA	NA	NA	NA	C	C	C	C	T	T	C	C	C	C	T	T	C	T	T	C	C	C	C	C	C	C	C	C	C	C	C	T	C	C	C	C	C	C	T	C	C	C	T
AX-94830572	A/G	1A	234228560	+	NA	NA	NA	NA	NA	NA	A	A	A	A	G	G	A	A	A	A	G	G	A	G	G	A	A	A	A	A	A	A	A	A	A	A	A	G	A	A	A	A	A	A	G	A	A	A	G
AX-109476107	C/T	1A	235106938	+	NA	NA	NA	NA	NA	NA	C	C	C	C	T	T	C	C	C	C	T	T	C	T	T	C	C	C	C	C	C	C	C	C	C	C	C	T	C	C	C	C	C	C	T	C	C	C	T
AX-108855445	C/T	1A	235494031	+	NA	NA	NA	NA	NA	NA	C	C	C	C	T	T	C	C	C	C	T	T	C	T	T	C	C	C	C	C	C	C	C	C	C	C	C	T	C	C	C	C	C	C	T	C	C	C	T
AX-110905198	T/G	1A	235687083	+	NA	NA	NA	NA	NA	NA	T	T	T	T	G	G	T	T	T	T	G	G	T	G	G	T	T	T	T	T	T	T	T	T	T	T	T	G	T	T	T	T	T	T	G	T	T	T	G
AX-94972200	C/T	1A	235688753	+	NA	NA	NA	NA	NA	NA	C	C	C	C	T	T	C	C	C	C	T	T	C	T	T	C	C	C	C	C	C	C	C	C	C	C	C	T	C	C	C	C	C	C	T	C	C	C	T
AX-86171782	T/C	1A	236721213	+	NA	NA	NA	NA	NA	NA	T	T	T	T	C	C	T	T	T	T	C	C	T	C	C	T	T	T	T	T	T	T	T	T	T	T	T	C	T	T	T	T	T	T	C	T	T	T	C
AX-86171783	T/C	1A	236721213	+	NA	NA	NA	NA	NA	NA	T	T	T	T	C	C	T	T	T	T	C	C	N	C	C	T	T	N	T	T	T	T	Y	T	T	T	T	C	N	T	T	T	T	T	C	T	T	T	C
AX-95096306	C/G	1A	236721384	+	NA	NA	NA	NA	NA	NA	C	C	C	C	G	G	C	C	C	C	G	G	C	G	G	C	C	C	C	C	C	C	C	C	C	C	C	G	C	C	C	C	C	C	G	C	C	C	G
AX-110592831	G/A	1A	236723044	+	NA	NA	NA	NA	NA	NA	G	G	G	G	A	A	G	G	G	G	A	A	G	R	A	G	G	G	G	G	G	G	G	G	G	G	G	A	G	G	G	G	G	G	A	G	G	G	A
AX-109610470	G/T	1A	237249040	+	NA	NA	NA	NA	NA	NA	G	G	G	G	T	T	G	G	G	G	T	T	G	T	T	G	G	N	G	G	G	G	G	G	G	G	G	T	G	G	G	G	G	G	T	G	G	G	T
AX-110987022	T/C	1A	237921931	+	NA	NA	NA	NA	NA	NA	T	T	T	T	C	C	T	T	T	T	C	C	T	C	C	T	T	T	T	T	T	T	T	T	T	T	T	C	T	T	T	T	T	T	C	T	T	T	C
AX-112287823	C/T	1A	238653598	+	NA	NA	NA	NA	NA	NA	N	C	C	C	T	T	C	C	N	N	T	T	C	T	T	C	C	C	C	C	C	C	C	C	C	C	Y	T	C	C	N	C	N	C	T	C	C	C	T
AX-94514773	C/T	1A	238653598	+	NA	NA	NA	NA	NA	NA	C	C	C	C	T	T	C	C	C	C	T	T	C	T	T	C	C	C	C	C	C	C	C	C	C	C	C	T	C	C	C	C	C	C	T	C	C	C	T
AX-179476497	G/T	1A	238680137	+	NA	NA	NA	NA	NA	NA	G	G	G	G	T	T	G	G	G	G	T	T	G	T	T	G	G	G	G	G	G	G	G	G	G	G	G	T	G	G	G	G	G	G	T	G	G	G	T
AX-95660246	G/T	1A	238680137	+	NA	NA	NA	NA	NA	NA	G	G	G	G	T	T	G	G	G	G	T	T	G	T	T	G	G	G	G	G	G	G	G	G	G	G	G	T	G	G	G	G	G	G	T	G	G	G	T
AX-111457627	A/G	1A	238995744	+	NA	NA	NA	NA	NA	NA	A	A	A	A	G	G	A	A	A	A	G	G	A	G	G	A	A	A	A	A	A	A	A	A	A	A	A	G	A	A	A	A	A	A	G	A	A	A	G
AX-111607396	T/C	1A	240313444	+	NA	NA	NA	NA	NA	NA	T	T	T	T	C	C	T	T	T	T	C	C	T	C	C	T	T	T	T	T	T	T	T	T	T	T	T	C	T	T	T	T	T	T	C	T	T	T	C
AX-111240271	T/C	1A	240934600	+	NA	NA	NA	NA	NA	NA	T	T	T	T	C	C	T	T	T	T	C	C	T	C	C	T	T	T	T	T	T	T	T	T	T	T	T	C	T	T	T	T	T	T	C	T	T	T	C
AX-110669824	G/T	1A	240937268	+	NA	NA	NA	NA	NA	NA	G	G	G	G	T	T	G	G	G	G	T	T	G	T	T	G	G	G	G	G	G	G	G	G	G	G	G	T	G	G	G	G	G	G	T	G	G	G	T
AX-108782177	T/C	1A	240948016	+	NA	NA	NA	NA	NA	NA	T	T	T	T	C	C	T	T	T	T	C	C	T	C	C	T	T	T	T	T	T	T	T	T	T	T	T	C	T	T	T	T	T	T	C	T	T	T	C
AX-110367274	G/A	1A	241654628	+	NA	NA	NA	NA	NA	NA	G	G	G	G	A	A	G	G	G	G	A	A	G	A	A	G	G	G	G	G	G	G	G	G	G	G	G	A	G	G	G	G	G	G	A	G	G	G	A
AX-95660239	G/A	1A	242012656	+	NA	NA	NA	NA	NA	NA	G	G	G	G	A	A	G	G	G	G	A	A	G	A	A	G	G	G	G	G	G	G	G	G	G	G	G	A	G	G	G	G	G	G	A	G	G	G	A
AX-111700010	G/A	1A	242531846	+	NA	NA	NA	NA	NA	NA	G	G	G	G	A	A	G	G	G	G	A	A	G	A	A	G	G	G	G	G	G	G	G	G	G	G	G	A	G	G	G	G	G	G	A	G	G	G	A
AX-95017779	T/C	1A	243161160	+	NA	NA	NA	NA	NA	NA	T	T	T	T	C	C	T	T	T	T	C	C	T	C	C	T	T	T	T	T	T	T	T	T	T	T	T	C	T	T	T	T	T	T	C	T	T	T	C
AX-109839299	T/G	1A	243620158	+	NA	NA	NA	NA	NA	NA	T	T	T	T	G	G	T	T	T	T	G	G	T	G	G	T	T	T	T	T	T	T	T	T	T	T	T	G	T	T	T	T	T	T	G	T	T	T	G
AX-110719183	C/T	1A	244141307	+	NA	NA	NA	NA	NA	NA	C	C	N	N	T	T	C	N	C	C	T	T	C	T	T	C	C	C	C	C	C	C	C	C	C	C	C	T	C	C	C	C	C	C	T	C	C	C	Y
AX-95139577	C/G	1A	244512384	+	NA	NA	NA	NA	NA	NA	G	G	C	C	G	G	C	N	C	G	C	C	C	C	C	G	C	C	G	G	G	G	C	C	G	C	C	G	G	G	C	C	C	C	C	C	C	C	C
AX-111165422	T/C	1A	247349667	+	NA	NA	NA	NA	NA	NA	T	T	T	T	C	C	T	T	T	T	C	C	T	C	C	T	T	T	T	T	T	T	T	T	T	T	T	C	T	T	T	T	T	T	C	T	T	T	C
AX-109441083	C/T	1A	247447016	+	NA	NA	NA	NA	NA	NA	C	C	C	C	T	T	C	C	C	C	T	T	C	T	T	C	C	C	C	C	C	C	C	C	C	C	C	T	C	C	C	C	C	C	T	C	C	C	T
AX-110153438	G/A	1A	248620986	+	NA	NA	NA	NA	NA	NA	G	G	G	G	A	A	G	G	G	G	A	A	G	A	A	G	G	G	G	G	G	G	G	G	G	G	R	A	G	G	G	G	G	G	A	G	G	G	A
AX-86164756	T/C	1A	249053380	+	NA	NA	NA	NA	NA	NA	T	T	T	T	C	C	T	T	T	T	C	C	T	C	C	T	T	T	T	T	T	T	T	T	T	T	T	C	T	T	T	T	T	T	C	T	T	T	C
AX-94465726	C/G	1A	249380045	+	NA	NA	NA	NA	NA	NA	C	C	C	C	G	G	C	C	C	C	G	G	C	G	G	C	C	C	C	C	C	C	C	C	C	C	C	G	C	C	C	C	C	C	G	C	C	C	G
AX-109397378	G/T	1A	249386022	+	NA	NA	NA	NA	NA	NA	G	G	G	G	T	T	G	G	G	G	T	T	G	T	T	G	G	G	G	G	G	G	G	G	G	G	G	T	G	G	G	G	G	G	T	G	G	G	T
AX-109107472	T/C	1A	250730108	+	NA	NA	NA	NA	NA	NA	T	T	T	T	C	C	T	T	T	T	C	C	T	C	C	T	T	T	T	T	T	T	T	T	T	T	T	C	T	T	T	T	T	T	C	T	T	T	C
AX-179476732	G/A	1A	251589343	+	NA	NA	NA	NA	NA	NA	G	G	G	G	A	A	G	G	N	G	A	A	G	A	A	G	G	G	G	G	G	G	G	G	G	G	G	A	G	G	G	G	G	G	A	G	G	G	A
AX-95632859	G/A	1A	251589343	+	NA	NA	NA	NA	NA	NA	G	G	G	G	A	A	G	G	G	G	A	A	G	A	A	G	G	G	G	G	G	G	G	G	G	G	G	A	G	G	G	G	G	G	A	G	G	G	A
AX-95657264	T/C	1A	251589389	+	NA	NA	NA	NA	NA	NA	T	T	T	T	C	C	T	T	T	T	C	C	T	C	C	T	T	T	T	T	T	T	T	T	T	T	T	C	T	T	T	T	T	T	C	T	T	T	C
AX-112289738	T/C	1A	251591365	+	NA	NA	NA	NA	NA	NA	T	T	T	T	N	N	T	T	T	T	N	Y	T	C	N	T	T	T	T	T	T	T	T	T	T	T	T	Y	T	T	T	T	T	T	C	T	T	T	C
AX-95253219	A/G	1A	253372955	+	NA	NA	NA	NA	NA	NA	A	A	A	A	G	G	A	A	A	A	G	G	A	G	G	A	A	A	A	A	A	A	A	A	A	A	A	G	A	A	A	A	A	A	G	A	A	A	G
AX-95226421	C/T	1A	253374038	+	NA	NA	NA	NA	NA	NA	C	C	C	C	T	T	C	C	C	N	T	T	C	T	T	C	C	C	C	C	C	C	C	C	C	C	C	T	C	C	C	Y	C	C	T	C	C	C	T
AX-110504333	C/A	1A	254370247	+	NA	NA	NA	NA	NA	NA	C	C	C	C	A	A	C	C	C	C	A	A	C	A	A	C	C	C	C	C	C	C	C	C	C	C	C	A	C	C	C	C	C	C	A	C	C	C	A
AX-112290416	T/G	1A	254385046	+	NA	NA	NA	NA	NA	NA	T	T	T	T	G	G	T	T	T	T	G	G	T	G	G	T	T	T	T	T	T	T	T	T	T	T	T	G	T	T	T	T	T	T	G	T	T	T	G
AX-95679450	T/G	1A	254385046	+	NA	NA	NA	NA	NA	NA	T	T	T	T	G	G	T	T	T	T	G	G	T	G	G	T	T	T	T	T	T	T	T	T	T	T	T	G	T	T	T	T	T	T	G	T	T	T	G
AX-112290443	A/G	1A	254385535	+	NA	NA	NA	NA	NA	NA	A	A	A	A	G	G	A	A	A	A	G	G	A	G	G	A	A	A	A	A	A	A	A	A	A	A	A	G	A	A	A	A	A	A	G	A	A	A	G
AX-86172807	A/G	1A	254386061	+	NA	NA	NA	NA	NA	NA	A	A	A	A	G	G	A	A	A	A	G	N	A	G	G	A	A	A	A	A	A	A	A	A	A	A	A	G	A	A	N	A	A	A	G	A	A	A	G
AX-86172808	A/G	1A	254386061	+	NA	NA	NA	NA	NA	NA	A	A	A	A	G	G	A	A	A	A	G	G	A	G	G	A	A	A	A	A	A	A	A	A	A	A	A	G	A	A	A	A	A	A	G	A	A	A	G
AX-108754837	T/C	1A	254387625	+	NA	NA	NA	NA	NA	NA	T	T	T	T	C	C	T	T	T	T	C	C	T	C	C	T	T	T	T	T	T	T	T	T	T	T	T	C	T	T	T	T	T	T	C	T	T	T	C
AX-111513869	T/C	1A	254393278	+	NA	NA	NA	NA	NA	NA	T	T	T	T	C	C	T	T	T	T	C	C	T	C	C	T	T	T	T	T	T	T	T	T	T	T	T	C	T	T	T	T	T	T	C	T	T	T	C
AX-110421810	A/G	1A	255302725	+	NA	NA	NA	NA	NA	NA	A	A	A	A	G	G	A	A	A	A	G	G	A	G	G	A	A	A	A	A	A	A	A	A	A	A	A	G	A	A	A	A	A	A	G	A	A	A	G
AX-94452312	C/G	1A	255487912	+	NA	NA	NA	NA	NA	NA	C	C	C	C	G	G	C	C	C	C	G	G	C	G	G	C	C	C	C	C	C	C	C	C	C	C	C	G	C	C	C	C	C	C	G	C	C	C	G
AX-94631437	T/C	1A	255848572	+	NA	NA	NA	NA	NA	NA	T	T	T	T	C	C	T	T	T	T	C	C	T	C	C	T	T	T	T	T	T	T	T	T	T	T	T	C	T	T	T	T	T	T	C	T	T	T	C
AX-94923976	T/C	1A	256679478	+	NA	NA	NA	NA	NA	NA	T	T	C	T	T	T	T	T	T	T	T	T	T	T	T	T	T	C	T	T	T	T	C	T	T	T	T	T	C	C	C	T	T	T	T	T	T	T	T
AX-108948975	C/T	1A	259062806	+	NA	NA	NA	NA	NA	NA	C	C	C	C	T	T	C	C	C	C	T	T	C	T	T	C	C	C	C	C	C	C	C	C	C	C	C	T	C	C	C	C	C	C	T	C	C	C	T
AX-95167291	T/C	1A	259994871	+	NA	NA	NA	NA	NA	NA	T	T	T	T	C	C	T	T	T	T	C	C	T	C	C	T	T	T	T	T	T	T	T	T	T	T	T	C	T	T	T	T	T	T	C	T	T	T	C
AX-94480929	G/A	1A	260835882	+	NA	NA	NA	NA	NA	NA	G	G	G	G	A	A	G	G	G	G	A	A	G	A	A	G	G	G	G	G	G	G	G	G	G	G	G	A	G	G	G	G	G	G	A	G	G	G	A
AX-111168439	G/C	1A	261825583	+	NA	NA	NA	NA	NA	NA	G	G	G	G	C	C	G	G	G	G	C	C	G	C	C	G	G	G	G	G	G	G	G	G	G	G	G	C	G	G	G	G	G	G	C	G	G	G	C
AX-109635929	T/C	1A	262929371	+	NA	NA	NA	NA	NA	NA	T	T	T	T	C	C	T	T	T	T	C	C	T	C	C	T	T	T	T	T	T	T	T	T	T	T	T	C	T	T	T	T	T	T	C	T	T	T	C
AX-109824940	C/T	1A	262939765	+	NA	NA	NA	NA	NA	NA	C	C	C	C	T	T	C	C	C	C	T	T	C	T	T	C	C	C	C	C	C	C	C	C	C	C	C	T	C	C	C	C	C	C	T	C	C	C	T
AX-89424853	A/G	1A	267158347	+	NA	NA	NA	NA	NA	NA	A	A	A	A	G	G	A	N	A	A	G	G	A	G	G	A	A	A	A	A	A	A	A	A	A	A	A	G	A	A	A	A	A	A	G	A	A	A	G
AX-109843062	G/T	1A	267715005	+	NA	NA	NA	NA	NA	NA	G	G	G	G	T	T	G	G	G	G	T	T	G	T	T	G	G	G	G	G	G	G	G	G	G	G	G	T	G	G	G	G	G	G	T	G	G	G	T
AX-111223739	A/C	1A	267881911	+	NA	NA	NA	NA	NA	NA	A	A	A	A	C	C	A	A	A	A	C	C	A	C	C	A	A	A	A	A	A	A	A	A	A	A	A	C	A	A	A	A	A	A	C	A	A	A	C
AX-108797865	A/T	1A	268315228	+	NA	NA	NA	NA	NA	NA	A	A	A	A	T	T	A	A	A	A	T	T	A	T	T	A	A	A	A	A	A	A	A	A	A	A	A	T	A	A	A	A	A	A	T	A	A	A	T
AX-108827668	G/A	1A	268381613	+	NA	NA	NA	NA	NA	NA	G	G	G	G	A	A	G	G	G	G	A	A	G	A	A	G	G	G	G	G	G	G	G	G	G	G	G	A	G	G	G	G	G	G	A	G	G	G	A
AX-94759010	G/A	1A	268925702	+	NA	NA	NA	NA	NA	NA	G	G	G	G	G	G	G	G	G	G	G	G	G	G	A	G	G	G	G	G	G	G	G	G	G	G	G	G	G	G	G	A	G	G	G	G	G	A	A
AX-94615593	G/A	1A	268925964	+	NA	NA	NA	NA	NA	NA	A	A	G	A	A	A	G	A	G	A	A	G	A	G	N	A	A	G	G	G	G	G	A	A	G	G	A	G	G	G	G	G	R	A	G	A	A	G	G
AX-94705481	C/G	1A	269581046	+	NA	NA	NA	NA	NA	NA	G	G	C	G	G	G	C	G	C	G	N	C	G	C	C	G	G	C	C	C	C	C	G	G	C	C	G	C	C	C	C	C	G	G	C	G	G	C	C
AX-179557593	A/G	1A	270007796	+	NA	NA	NA	NA	NA	NA	A	A	A	A	G	G	A	A	A	A	G	G	A	G	G	A	A	R	A	A	A	A	A	A	A	A	A	G	A	A	A	A	A	A	G	A	A	A	G
AX-95629860	A/G	1A	270007796	+	NA	NA	NA	NA	NA	NA	A	A	A	A	G	G	A	A	A	A	G	G	A	G	G	A	A	A	A	A	A	A	A	A	A	A	A	G	A	A	A	A	A	A	G	A	A	A	G
AX-110455706	C/T	1A	270133145	+	NA	NA	NA	NA	NA	NA	C	C	C	C	T	T	C	C	C	C	T	T	C	T	T	C	C	C	C	C	C	C	C	C	C	C	C	T	C	C	C	C	C	C	T	C	C	C	T
AX-110042323	C/T	1A	270885060	+	NA	NA	NA	NA	NA	NA	C	C	C	C	T	T	C	C	C	C	T	T	C	T	T	C	C	C	C	C	C	C	C	C	C	C	C	T	C	C	C	C	C	C	T	C	C	C	T
AX-86177877	G/A	1A	272313241	+	NA	NA	NA	NA	NA	NA	G	G	G	G	A	A	G	G	G	G	A	A	G	A	A	G	G	G	G	G	G	G	G	G	G	G	G	A	G	G	G	G	G	G	A	G	G	G	A
AX-86177879	G/A	1A	272313241	+	NA	NA	NA	NA	NA	NA	G	G	G	G	A	A	G	G	G	G	A	A	G	A	A	G	G	G	G	G	G	G	G	G	G	G	G	A	G	G	G	G	G	G	A	G	G	G	A
AX-94399869	G/A	1A	272316170	+	NA	NA	NA	NA	NA	NA	G	G	G	G	A	A	G	G	G	G	A	A	G	A	A	G	G	G	G	G	G	G	G	G	G	G	G	A	G	G	G	G	G	G	A	G	G	G	A
AX-108936390	C/T	1A	272615683	+	NA	NA	NA	NA	NA	NA	C	C	C	C	T	T	C	C	C	C	T	T	C	T	T	C	C	C	C	C	C	C	C	C	C	C	C	T	C	C	C	C	C	C	T	C	C	C	T
AX-94781823	T/C	1A	274785621	+	NA	NA	NA	NA	NA	NA	T	T	T	T	C	C	T	T	T	T	C	C	T	C	C	T	T	T	T	T	T	T	T	T	T	T	T	C	T	T	T	T	T	T	C	T	T	T	C
AX-95630129	T/C	1A	274785621	+	NA	NA	NA	NA	NA	NA	T	T	T	T	C	C	T	T	T	T	C	C	T	C	C	T	T	T	T	T	T	T	T	T	T	T	T	C	T	T	T	T	T	T	C	T	T	T	C
AX-109386605	G/A	1A	275279850	+	NA	NA	NA	NA	NA	NA	G	G	G	G	A	A	G	G	G	G	A	A	G	A	A	G	G	G	G	G	G	G	G	G	G	G	G	A	G	G	G	G	G	G	A	G	G	G	A
AX-178076122	C/T	1A	276322736	+	NA	NA	NA	NA	NA	NA	C	C	C	C	T	T	C	C	C	C	T	T	C	T	T	C	C	C	C	C	C	C	C	C	C	C	C	T	C	C	C	C	C	C	T	C	C	C	T
AX-94581406	C/T	1A	276322736	+	NA	NA	NA	NA	NA	NA	C	C	C	C	T	T	C	C	C	C	T	T	C	T	T	C	C	C	C	C	C	C	C	C	C	C	C	T	C	C	C	C	C	C	T	C	C	C	T
AX-111607240	G/T	1A	276805418	+	NA	NA	NA	NA	NA	NA	G	G	G	G	T	T	G	G	G	G	T	T	G	T	T	G	G	G	G	G	G	G	G	G	G	G	G	T	G	G	G	G	G	G	T	G	G	G	T
AX-112290965	C/T	1A	279824981	+	NA	NA	NA	NA	NA	NA	C	C	C	C	C	C	T	C	T	C	C	T	C	T	T	C	C	T	T	T	T	T	C	C	C	T	C	T	C	T	C	T	C	C	T	C	C	T	T
AX-179558417	T/C	1A	279824981	+	NA	NA	NA	NA	NA	NA	C	C	C	C	C	C	T	C	T	C	C	T	C	T	T	C	C	T	T	T	T	T	C	C	C	T	C	T	C	T	C	T	C	C	T	C	C	T	T
AX-95232790	A/G	1A	279825295	+	NA	NA	NA	NA	NA	NA	A	A	A	A	A	A	G	A	G	A	A	G	A	G	G	A	A	G	G	G	G	G	A	A	A	G	A	G	A	G	A	G	A	A	G	A	A	G	G
AX-109576273	G/A	1A	279825442	+	NA	NA	NA	NA	NA	NA	G	G	G	G	G	G	A	G	A	G	G	A	G	A	A	G	G	A	A	A	A	A	G	G	G	A	G	A	G	A	G	A	G	G	A	G	G	A	A
AX-179559863	G/A	1A	279825442	+	NA	NA	NA	NA	NA	NA	G	G	G	G	G	G	A	G	A	G	G	A	G	A	A	G	G	A	A	A	A	A	G	G	G	A	G	A	G	A	G	A	G	G	A	G	G	A	A
AX-94428537	C/A	1A	279826254	+	NA	NA	NA	NA	NA	NA	C	C	C	C	C	C	A	C	A	C	C	A	C	A	A	C	C	A	A	A	A	A	C	C	C	A	C	A	C	A	C	A	C	C	A	C	C	A	A
AX-95659390	C/A	1A	279826289	+	NA	NA	NA	NA	NA	NA	C	C	C	C	C	C	A	C	A	C	C	A	N	A	A	C	C	A	A	A	A	A	C	C	C	A	C	A	C	A	C	A	C	C	A	C	C	A	A
AX-94585817	T/G	1A	279830705	+	NA	NA	NA	NA	NA	NA	K	K	K	K	G	G	T	K	T	K	G	K	K	K	K	K	K	T	T	T	T	T	K	K	K	T	K	K	K	T	K	T	K	K	K	K	K	T	K
AX-95182518	T/C	1A	279832345	+	NA	NA	NA	NA	NA	NA	T	T	T	T	C	C	T	T	T	T	C	C	T	C	C	T	T	T	T	T	T	T	T	T	T	T	T	C	T	T	T	T	T	T	C	T	T	T	C
AX-94489656	C/T	1A	279837911	+	NA	NA	NA	NA	NA	NA	C	C	C	C	T	T	C	C	C	C	T	T	C	T	T	C	C	C	C	C	C	C	C	C	C	C	C	T	C	C	C	C	C	C	T	C	C	C	T
AX-95163312	G/T	1A	279839865	+	NA	NA	NA	NA	NA	NA	G	G	G	G	G	G	T	G	T	G	G	T	G	T	T	G	G	T	T	T	T	T	G	G	G	T	G	T	G	T	G	T	G	G	T	G	G	T	T
AX-108890616	G/T	1A	280229024	+	NA	NA	NA	NA	NA	NA	G	G	G	G	T	T	G	G	G	G	T	T	G	T	T	G	G	G	G	G	G	G	G	G	G	G	G	T	G	G	G	G	G	G	T	G	G	G	T
AX-110969943	C/G	1A	280734059	+	NA	NA	NA	NA	NA	NA	C	C	C	C	G	G	C	C	C	C	G	G	C	G	G	C	C	C	C	C	C	C	C	C	C	C	C	G	C	C	C	C	C	C	G	C	C	C	G
AX-179557831	A/G	1A	281657026	+	NA	NA	NA	NA	NA	NA	A	A	A	A	A	A	A	A	A	A	R	N	A	R	R	A	A	A	A	A	A	A	A	A	A	A	A	R	A	A	A	A	A	A	R	A	A	A	A
AX-95630456	A/G	1A	281657026	+	NA	NA	NA	NA	NA	NA	A	A	A	A	A	A	A	A	A	A	G	G	A	G	G	A	A	A	A	A	A	A	A	A	A	A	A	G	A	A	A	A	A	A	G	A	A	A	A
AX-158606455	T/C	1A	281889221	+	NA	NA	NA	NA	NA	NA	C	C	T	C	T	T	T	C	T	C	C	T	C	T	T	C	C	T	T	T	T	T	C	C	T	T	C	T	T	T	T	T	T	C	T	C	C	T	T
AX-109875791	T/C	1A	285433965	+	NA	NA	NA	NA	NA	NA	T	T	T	T	C	C	T	T	T	T	C	C	T	C	C	T	T	T	T	T	T	T	T	T	T	T	T	C	T	T	T	T	T	T	C	T	T	T	C
AX-94648151	T/C	1A	288871008	+	NA	NA	NA	NA	NA	NA	T	T	T	T	C	C	T	T	T	T	C	C	T	C	C	T	T	T	T	T	T	T	T	T	T	T	T	C	T	T	T	T	T	T	C	T	T	T	C
AX-95184164	G/A	1A	289328472	+	NA	NA	NA	NA	NA	NA	G	G	G	N	A	A	G	G	G	G	G	G	G	G	G	G	G	A	G	G	G	G	G	G	G	G	G	G	G	G	G	A	G	G	G	G	G	G	A
AX-110057169	G/A	1A	290121233	+	NA	NA	NA	NA	NA	NA	G	G	G	G	A	A	G	G	G	G	A	A	G	A	A	G	G	G	G	G	G	G	G	G	G	G	G	A	G	G	G	G	G	G	A	G	G	G	A
AX-108869561	A/G	1A	290142235	+	NA	NA	NA	NA	NA	NA	A	A	A	A	G	G	A	A	A	A	G	G	A	G	G	A	A	A	A	A	A	A	A	A	A	A	A	G	A	A	A	A	A	A	G	A	A	A	G
AX-110174084	G/A	1A	290592278	+	NA	NA	NA	NA	NA	NA	G	G	G	G	A	A	G	G	G	G	A	A	G	A	A	G	G	G	G	G	G	G	G	G	G	G	G	A	G	G	G	G	G	G	A	G	G	G	A
AX-111566945	G/T	1A	291232725	+	NA	NA	NA	NA	NA	NA	T	T	G	G	G	G	T	G	T	T	G	G	T	G	G	T	T	G	T	T	T	T	G	T	T	G	G	G	G	G	G	G	G	G	G	T	T	G	G
AX-111556044	G/A	1A	291255227	+	NA	NA	NA	NA	NA	NA	A	A	G	G	G	G	A	G	A	A	G	G	A	G	G	A	A	N	A	A	A	A	G	A	A	G	G	G	G	G	G	G	G	G	G	A	A	G	G
AX-179559455	G/A	1A	291255227	+	NA	NA	NA	NA	NA	NA	A	A	G	G	G	G	A	G	A	A	G	G	A	G	N	A	A	G	A	A	A	A	G	A	A	G	G	G	G	G	G	G	G	G	G	A	A	G	G
AX-109437723	C/T	1A	291506498	+	NA	NA	NA	NA	NA	NA	C	C	C	C	T	T	C	C	C	C	T	T	C	T	T	C	C	C	C	C	C	C	C	C	C	C	C	T	C	C	C	C	C	C	T	C	C	C	T
AX-94818544	T/G	1A	291730401	+	NA	NA	NA	NA	NA	NA	T	T	T	T	G	G	T	T	T	T	G	G	T	G	G	T	T	T	T	T	T	T	T	T	T	T	T	G	T	T	T	T	T	T	G	T	T	T	G
AX-95247576	A/G	1A	292078306	+	NA	NA	NA	NA	NA	NA	G	G	A	A	A	A	G	A	G	G	A	A	G	A	A	G	G	A	G	G	G	G	A	G	G	A	A	A	A	A	A	A	A	A	A	G	N	A	A
AX-179557386	C/A	1A	292078341	+	NA	NA	NA	NA	NA	NA	C	C	A	A	C	C	C	A	C	C	C	C	C	C	C	C	C	A	C	C	C	C	A	C	C	A	A	C	A	A	A	A	A	A	C	C	C	A	C
AX-94725051	C/A	1A	292078341	+	NA	NA	NA	NA	NA	NA	C	C	A	A	C	C	C	A	C	C	C	C	C	C	C	C	C	A	C	C	C	C	A	C	C	A	A	C	A	A	A	A	A	A	C	C	C	A	C
AX-94601379	C/T	1A	292078845	+	NA	NA	NA	NA	NA	NA	Y	Y	C	C	N	C	Y	C	Y	Y	C	C	Y	C	C	Y	Y	C	Y	Y	Y	Y	C	Y	Y	C	C	C	C	C	C	C	C	C	C	Y	Y	C	C
AX-109870783	T/C	1A	292877973	+	NA	NA	NA	NA	NA	NA	T	T	T	T	C	C	T	T	T	T	C	C	T	C	C	T	T	T	T	T	T	T	T	T	T	T	T	C	T	T	T	T	T	T	C	T	T	T	C
AX-110509996	C/G	1A	294033293	+	NA	NA	NA	NA	NA	NA	C	C	C	C	G	G	C	C	C	C	G	G	C	G	G	C	C	C	C	C	C	C	C	C	C	C	C	G	C	C	C	C	C	C	G	C	C	C	G
AX-179477104	C/A	1A	294858466	+	NA	NA	NA	NA	NA	NA	C	C	C	C	A	A	C	C	C	C	A	A	C	A	A	C	C	C	C	C	C	C	C	C	C	C	C	A	C	C	C	C	C	C	A	C	C	C	A
AX-94986498	A/G	1A	297381012	+	NA	NA	NA	NA	NA	NA	N	A	A	A	G	G	A	A	A	A	A	A	A	A	G	A	A	N	A	A	A	A	A	A	A	A	A	A	A	A	A	A	N	A	A	A	A	G	G
AX-111127506	C/T	1A	297688700	+	NA	NA	NA	NA	NA	NA	C	C	C	C	T	T	C	C	C	C	T	T	C	T	T	C	C	C	C	C	C	C	C	C	C	C	C	T	C	C	C	C	C	C	T	C	C	C	T
AX-111002326	C/T	1A	297715248	+	NA	NA	NA	NA	NA	NA	C	C	C	C	T	T	C	C	C	C	T	T	C	T	T	C	C	C	C	C	C	C	C	C	C	C	C	T	C	C	C	C	C	C	T	C	C	C	T
AX-110515579	A/G	1A	297738581	+	NA	NA	NA	NA	NA	NA	A	A	A	A	G	G	A	A	A	A	G	G	A	G	G	A	A	A	A	A	A	A	A	A	A	A	A	G	A	A	A	A	A	A	G	A	A	A	G
AX-111774545	C/T	1A	297821041	+	NA	NA	NA	NA	NA	NA	C	C	C	C	T	T	C	C	C	C	T	T	C	T	T	C	C	C	C	C	C	C	C	C	C	C	C	T	C	C	C	C	C	C	T	C	C	C	T
AX-110943762	C/T	1A	297883939	+	NA	NA	NA	NA	NA	NA	C	C	C	C	T	T	C	C	C	C	T	T	C	T	T	C	C	C	C	C	C	C	C	C	C	C	C	T	C	C	C	C	C	C	T	C	C	C	T
AX-95089938	C/T	1A	298109127	+	NA	NA	NA	NA	NA	NA	C	C	C	C	T	T	C	N	C	C	T	T	C	T	T	C	C	C	C	C	C	C	C	C	C	C	C	T	C	C	C	C	C	C	T	C	C	C	T
AX-94412593	T/C	1A	298115833	+	NA	NA	NA	NA	NA	NA	T	T	T	T	C	C	T	T	T	T	C	C	T	C	C	T	T	T	T	T	T	T	T	T	T	T	T	C	T	T	T	T	T	T	C	T	T	T	C
AX-86178422	T/C	1A	298116028	+	NA	NA	NA	NA	NA	NA	T	T	T	T	C	C	T	T	T	T	C	C	T	C	C	T	T	T	T	T	T	T	T	T	T	T	T	C	T	T	T	T	T	T	C	T	T	T	C
AX-86178423	T/C	1A	298116028	+	NA	NA	NA	NA	NA	NA	T	T	T	T	C	C	T	T	T	T	C	C	T	C	C	T	T	T	T	T	T	T	T	T	T	T	T	C	T	T	T	T	T	T	C	T	T	T	C
AX-94406568	C/T	1A	298116904	+	NA	NA	NA	NA	NA	NA	C	C	C	C	T	T	C	C	C	C	T	T	C	T	T	C	C	C	C	C	C	C	C	C	C	C	C	T	C	C	C	C	C	C	T	C	C	C	T
AX-95631434	C/T	1A	298116904	+	NA	NA	NA	NA	NA	NA	C	C	C	C	T	T	C	C	C	C	T	T	C	T	T	C	C	C	C	C	C	C	C	C	C	C	C	T	C	C	C	C	C	C	T	C	C	C	T
AX-86177248	C/A	1A	298117356	+	NA	NA	NA	NA	NA	NA	C	C	C	C	A	A	C	C	C	C	A	A	C	A	A	C	C	C	C	C	C	C	C	C	C	C	C	M	C	C	C	C	C	C	A	C	C	C	A
AX-111129992	C/T	1A	298531231	+	NA	NA	NA	NA	NA	NA	C	C	C	C	T	T	C	C	C	C	T	T	C	T	T	C	C	C	C	C	C	C	C	C	C	C	C	T	C	C	C	C	C	C	T	C	C	C	T
AX-110169096	C/A	1A	298624367	+	NA	NA	NA	NA	NA	NA	C	C	C	C	A	A	C	C	C	C	A	A	C	A	A	C	C	C	C	C	C	C	C	C	C	C	C	A	C	C	C	C	C	C	A	C	C	C	A
AX-94400371	C/T	1A	298646355	+	NA	NA	NA	NA	NA	NA	C	C	C	C	T	T	C	C	C	C	T	T	C	T	T	C	C	C	C	C	C	C	C	C	C	C	C	T	C	C	C	C	C	C	T	C	C	C	T
AX-110517610	T/C	1A	299493451	+	NA	NA	NA	NA	NA	NA	T	T	T	T	C	C	T	T	T	T	C	C	T	C	C	T	T	T	T	T	T	T	T	T	T	T	T	C	T	T	T	T	T	T	C	T	T	T	C
AX-179558575	G/T	1A	299657716	+	NA	NA	NA	NA	NA	NA	G	G	G	G	T	T	G	G	G	G	G	G	G	G	T	G	G	G	G	G	G	G	G	G	G	G	G	G	G	G	G	G	T	G	G	G	G	T	T
AX-95658361	G/T	1A	299657716	+	NA	NA	NA	NA	NA	NA	G	G	G	G	T	T	G	G	G	G	G	G	G	G	T	G	G	G	G	G	G	G	G	G	G	G	G	G	G	G	G	G	T	G	G	G	G	T	T
AX-86178342	A/C	1A	301197484	+	NA	NA	NA	NA	NA	NA	C	C	A	A	A	A	C	A	C	C	C	C	C	C	C	C	A	A	C	C	C	C	A	A	C	N	A	C	A	A	A	A	A	A	C	A	A	A	A
AX-86178346	C/A	1A	301197484	+	NA	NA	NA	NA	NA	NA	C	C	A	A	A	A	C	A	C	C	C	C	C	C	C	C	A	A	C	C	C	C	A	A	C	A	A	C	A	A	A	A	N	A	C	A	A	A	A
AX-94441967	C/G	1A	301198132	+	NA	NA	NA	NA	NA	NA	G	G	C	C	C	C	G	C	G	G	G	G	G	G	G	G	C	C	G	G	G	G	C	C	G	C	C	G	C	C	C	C	C	C	G	C	C	C	C
AX-110029223	A/G	1A	301225839	+	NA	NA	NA	NA	NA	NA	G	G	A	A	A	A	G	A	G	G	G	G	G	G	G	G	A	A	G	G	G	G	A	A	G	A	A	G	A	A	A	A	A	A	G	A	A	A	A
AX-94648330	C/T	1A	301776453	+	NA	NA	NA	NA	NA	NA	T	T	T	C	T	T	C	C	C	T	T	C	C	C	T	T	C	C	C	C	C	C	T	C	T	C	C	C	T	C	T	T	C	C	C	C	C	T	T
AX-95237226	T/C	1A	301776516	+	NA	NA	NA	NA	NA	NA	C	C	T	T	T	T	C	T	C	C	C	C	C	C	C	C	T	T	C	C	C	C	T	T	C	T	T	C	T	T	T	T	T	T	C	T	T	T	T
AX-95658453	T/C	1A	301776516	+	NA	NA	NA	NA	NA	NA	C	C	T	T	T	T	C	T	C	C	C	C	C	C	C	C	T	T	C	C	C	C	T	T	C	T	T	C	T	T	T	T	T	T	C	T	T	T	T
AX-95238138	T/C	1A	301782334	+	NA	NA	NA	NA	NA	NA	C	C	T	T	T	T	C	T	C	C	C	C	C	C	C	C	T	T	C	C	C	C	T	T	C	T	T	C	T	T	T	T	T	T	C	T	T	T	T
AX-95684906	T/C	1A	301782334	+	NA	NA	NA	NA	NA	NA	C	C	T	T	T	T	C	T	C	C	C	C	C	C	C	C	T	T	C	C	C	C	T	T	C	T	T	C	T	T	T	T	T	T	C	T	T	T	T
AX-179559749	G/A	1A	301857714	+	NA	NA	NA	NA	NA	NA	A	A	G	G	G	G	A	G	A	A	A	A	A	A	A	A	G	G	A	A	A	A	G	G	A	G	G	A	G	G	G	G	G	G	A	G	G	G	G
AX-95631639	G/A	1A	301857714	+	NA	NA	NA	NA	NA	NA	A	A	G	G	G	G	A	G	A	A	A	A	A	A	A	A	G	G	A	A	A	A	G	G	A	G	G	A	G	G	G	G	G	G	A	G	G	G	G
AX-108880240	G/A	1A	302199837	+	NA	NA	NA	NA	NA	NA	A	A	G	G	G	G	A	G	A	A	A	A	A	A	A	A	G	G	A	A	A	A	G	G	A	G	G	A	G	G	G	G	G	G	A	G	G	G	G
AX-109054331	G/A	1A	302218996	+	NA	NA	NA	NA	NA	NA	A	A	G	G	G	G	A	G	A	A	A	A	A	A	A	A	G	G	A	A	A	A	G	G	A	G	G	A	G	G	G	G	G	G	A	G	G	G	G
AX-111530836	C/A	1A	302614490	+	NA	NA	NA	NA	NA	NA	C	C	C	C	C	C	C	C	C	C	A	A	C	A	A	C	C	C	C	C	C	C	C	C	C	C	C	A	C	C	C	C	C	C	A	C	C	C	C
AX-109839840	T/C	1A	302625821	+	NA	NA	NA	NA	NA	NA	C	C	T	T	T	T	C	T	C	C	C	C	C	C	C	C	T	T	C	C	C	C	T	T	C	T	T	C	T	T	T	T	T	T	C	T	T	T	T
AX-94997890	T/C	1A	302628817	+	NA	NA	NA	NA	NA	NA	T	C	T	T	T	N	C	T	C	C	C	C	C	C	C	C	T	T	C	C	C	C	T	T	C	T	T	C	T	T	T	T	T	T	C	T	T	T	T
AX-111719607	C/T	1A	302640298	+	NA	NA	NA	NA	NA	NA	T	T	C	C	C	C	T	C	T	T	T	T	T	T	T	T	C	C	T	T	T	T	C	C	T	C	C	T	C	C	C	C	C	C	T	C	C	C	C
AX-110998966	T/C	1A	303024845	+	NA	NA	NA	NA	NA	NA	C	C	T	T	T	T	C	T	C	C	C	C	C	C	C	C	T	T	C	C	C	C	T	T	C	T	T	C	T	T	T	T	T	T	C	T	T	T	T
AX-108927863	T/C	1A	303026817	+	NA	NA	NA	NA	NA	NA	C	C	T	T	T	T	C	T	C	C	C	C	C	C	C	C	T	T	C	C	C	C	T	T	C	T	T	C	T	T	T	T	T	T	C	T	T	T	T
AX-109302826	G/T	1A	303406271	+	NA	NA	NA	NA	NA	NA	T	T	G	G	G	G	T	G	T	T	T	T	T	T	T	T	G	G	T	T	T	T	G	G	T	G	G	T	G	G	G	G	G	G	T	G	G	G	G
AX-108877470	T/G	1A	303408546	+	NA	NA	NA	NA	NA	NA	G	G	T	T	T	T	G	T	G	G	G	G	G	G	G	G	T	T	G	G	G	G	T	T	G	T	T	G	T	T	T	T	K	T	G	T	T	T	T
AX-110542156	A/G	1A	303783357	+	NA	NA	NA	NA	NA	NA	G	G	A	A	A	A	G	A	G	G	G	G	G	G	G	G	A	A	G	G	G	G	A	A	G	A	A	G	A	A	A	A	A	A	G	A	A	A	A
AX-94895904	C/T	1A	303853916	+	NA	NA	NA	NA	NA	NA	C	C	C	C	T	T	C	C	C	C	C	C	C	C	C	C	C	C	C	C	C	C	C	C	C	C	C	C	C	C	C	C	C	C	C	C	C	C	T
AX-109818943	C/T	1A	304032638	+	NA	NA	NA	NA	NA	NA	T	T	C	C	C	C	T	C	T	T	T	T	T	T	T	T	C	C	T	T	T	T	C	C	T	C	C	T	C	C	C	C	C	C	T	C	C	C	C
AX-110417344	G/A	1A	304035353	+	NA	NA	NA	NA	NA	NA	G	G	G	G	G	G	G	G	G	G	A	A	G	A	A	G	G	G	G	G	G	G	G	G	G	G	G	A	G	G	G	G	G	G	A	G	G	G	G
AX-179559256	G/A	1A	304038609	+	NA	NA	NA	NA	NA	NA	A	A	G	G	G	G	A	G	A	A	A	A	A	A	A	A	G	G	A	A	A	A	G	G	A	G	G	A	G	G	G	G	G	G	A	G	G	G	G
AX-94408765	G/A	1A	304038609	+	NA	NA	NA	NA	NA	NA	A	A	G	G	G	G	A	G	A	A	A	A	A	A	A	A	G	G	A	A	A	A	G	G	A	G	G	A	G	G	G	G	G	G	A	G	G	G	G
AX-111775939	G/A	1A	304177126	+	NA	NA	NA	NA	NA	NA	A	A	G	G	G	G	A	G	A	A	A	A	A	A	A	A	G	G	A	A	A	A	G	G	A	G	G	A	G	G	G	G	G	G	A	G	G	G	G
AX-109828158	C/A	1A	304988856	+	NA	NA	NA	NA	NA	NA	A	A	C	C	C	C	A	C	A	A	A	A	A	A	A	A	C	C	A	A	A	A	C	C	A	C	C	A	C	C	C	C	C	C	A	C	C	C	C
AX-109355248	A/G	1A	304992143	+	NA	NA	NA	NA	NA	NA	G	G	A	A	A	A	G	A	G	G	G	G	G	G	G	G	A	A	G	G	G	G	A	A	G	A	A	G	A	A	A	A	N	A	G	A	A	A	A
AX-95660394	G/A	1A	304997922	+	NA	NA	NA	NA	NA	NA	G	G	G	G	G	G	G	G	G	G	A	A	G	A	A	G	G	G	G	G	G	G	G	G	G	G	G	A	G	G	G	G	G	G	A	G	G	G	G
AX-86172357	A/G	1A	305003292	+	NA	NA	NA	NA	NA	NA	G	G	A	A	A	A	G	A	G	G	G	G	G	G	G	G	A	A	G	G	G	G	A	A	G	A	A	G	A	A	A	A	A	A	G	A	A	A	N
AX-94446416	C/G	1A	305003294	+	NA	NA	NA	NA	NA	NA	G	G	C	C	C	C	G	C	G	G	G	G	G	G	G	G	C	C	G	G	G	G	C	C	G	C	C	G	C	C	C	C	C	C	G	C	C	C	C
AX-109533571	T/A	1A	305004176	+	NA	NA	NA	NA	NA	NA	T	T	T	T	T	T	T	T	T	T	A	A	T	A	A	T	T	T	T	T	T	T	T	T	T	T	T	A	T	T	T	T	T	T	A	T	T	T	T
AX-86163495	T/C	1A	305327669	+	NA	NA	NA	NA	NA	NA	C	C	T	T	T	T	C	T	C	C	C	C	C	C	C	C	T	T	C	C	C	C	T	T	C	T	T	C	T	T	T	T	T	T	C	T	T	T	T
AX-86163496	T/C	1A	305327669	+	NA	NA	NA	NA	NA	NA	C	C	T	N	T	T	C	T	C	C	C	C	C	C	C	C	T	T	C	C	C	C	T	T	C	T	T	C	T	T	T	T	T	T	C	T	T	T	T
AX-110558039	A/G	1A	305330586	+	NA	NA	NA	NA	NA	NA	G	G	A	A	A	A	G	A	G	G	G	G	G	G	G	G	A	A	G	G	G	G	A	A	G	A	A	G	A	A	A	A	A	A	G	A	A	A	A
AX-95105199	C/T	1A	306112162	+	NA	NA	NA	NA	NA	NA	C	C	C	C	C	C	C	C	C	C	T	T	C	T	T	C	C	C	C	C	C	C	C	C	C	C	C	T	C	C	C	C	C	C	T	C	C	C	C
AX-95651965	C/T	1A	306112162	+	NA	NA	NA	NA	NA	NA	C	C	C	C	C	C	C	C	C	C	T	T	C	T	T	C	C	C	C	C	C	C	C	C	C	C	C	T	C	C	C	C	C	C	T	C	C	C	C
AX-179558348	G/A	1A	306983490	+	NA	NA	NA	NA	NA	NA	G	G	G	G	G	G	G	G	G	G	A	A	G	A	A	G	G	G	G	G	G	G	G	G	G	G	G	A	G	G	G	G	G	G	A	G	G	G	G
AX-95164645	G/A	1A	306983490	+	NA	NA	NA	NA	NA	NA	G	G	G	G	G	G	G	G	G	G	A	A	G	A	A	G	G	G	G	G	G	G	G	G	G	G	G	A	G	G	G	G	G	G	A	G	G	G	G
AX-108943547	C/G	1A	307683571	+	NA	NA	NA	NA	NA	NA	G	G	C	C	C	C	G	C	G	G	G	G	G	G	G	G	C	C	G	G	G	G	C	C	G	C	C	G	C	C	C	C	C	C	G	C	C	C	C
AX-109032218	T/C	1A	307683631	+	NA	NA	NA	NA	NA	NA	C	C	T	T	T	T	C	T	C	C	C	C	C	C	C	C	T	T	C	C	C	C	T	T	C	T	T	C	T	T	T	T	T	T	C	T	T	T	T
AX-109846269	A/G	1A	307703199	+	NA	NA	NA	NA	NA	NA	G	G	A	A	A	A	G	A	G	G	G	G	G	G	G	G	A	A	G	G	G	G	A	A	G	A	A	G	A	A	A	A	A	A	G	A	A	A	A
AX-179476096	C/T	1A	307705711	+	NA	NA	NA	NA	NA	NA	T	T	C	C	C	C	T	N	T	T	T	T	T	T	T	T	C	C	T	T	T	T	C	C	T	C	N	T	C	C	C	C	C	C	T	C	C	C	C
AX-95654041	C/T	1A	307705711	+	NA	NA	NA	NA	NA	NA	T	T	C	C	C	C	T	C	Y	T	T	T	T	T	T	T	C	C	T	T	T	T	C	N	T	C	Y	T	C	C	C	C	C	C	T	C	C	C	C
AX-94962498	C/T	1A	307706593	+	NA	NA	NA	NA	NA	NA	T	T	C	C	C	C	T	C	T	T	T	T	T	T	T	T	C	C	T	T	T	T	C	C	T	C	C	T	C	C	C	C	C	C	T	C	C	C	C
AX-179560175	G/A	1A	308210617	+	NA	NA	NA	NA	NA	NA	N	A	G	G	G	G	A	G	A	A	N	A	A	A	A	A	G	G	A	A	A	A	G	G	A	G	G	A	G	G	G	G	G	G	A	G	G	G	G
AX-95631834	G/A	1A	308210617	+	NA	NA	NA	NA	NA	NA	A	A	G	G	G	G	A	G	A	A	A	A	A	A	A	A	G	G	A	A	A	A	G	G	A	G	G	A	G	G	G	G	G	G	A	G	G	G	G
AX-94704464	G/A	1A	308347989	+	NA	NA	NA	NA	NA	NA	G	G	G	G	G	G	G	G	G	G	A	A	G	A	A	G	G	G	G	G	G	G	G	G	G	G	G	A	G	G	G	G	G	G	A	G	G	G	G
AX-179475578	C/T	1A	308572338	+	NA	NA	NA	NA	NA	NA	C	C	C	C	T	T	C	C	C	C	C	C	C	C	C	C	C	C	C	C	C	C	C	C	C	C	C	C	C	C	C	C	C	C	C	C	C	C	T
AX-108982129	C/T	1A	308574673	+	NA	NA	NA	NA	NA	NA	T	T	C	C	C	C	T	C	T	T	T	T	T	T	T	T	C	C	T	T	T	T	C	C	T	C	C	T	C	C	C	C	C	C	T	C	C	C	C
AX-179560959	A/G	1A	308812861	+	NA	NA	NA	NA	NA	NA	G	G	A	A	A	A	G	A	G	G	G	G	G	G	G	G	A	A	G	G	G	G	A	A	G	A	A	G	A	A	A	A	A	A	G	A	A	A	A
AX-95632280	A/G	1A	308812861	+	NA	NA	NA	NA	NA	NA	G	G	A	A	A	A	G	A	G	G	G	G	G	G	G	G	A	A	G	G	G	G	A	A	G	A	A	G	A	A	A	A	A	A	N	A	A	A	A
AX-86175462	C/T	1A	308813558	+	NA	NA	NA	NA	NA	NA	T	T	C	C	C	C	T	C	T	T	T	T	T	T	T	T	C	C	T	T	T	T	C	C	T	C	C	T	C	C	C	C	C	C	T	C	C	C	C
AX-108922989	A/G	1A	308814456	+	NA	NA	NA	NA	NA	NA	G	G	A	A	A	A	G	A	G	G	G	G	G	G	G	G	A	A	G	G	G	G	A	A	G	A	A	G	A	A	A	A	A	A	G	A	A	A	A
AX-110029490	G/A	1A	308943245	+	NA	NA	NA	NA	NA	NA	G	G	G	G	G	G	G	G	G	G	A	A	G	A	A	G	G	G	G	G	G	G	G	G	G	G	G	A	G	G	G	G	G	G	A	G	G	G	G
AX-108964531	C/T	1A	309000814	+	NA	NA	NA	NA	NA	NA	C	C	C	C	C	C	C	C	C	C	T	T	C	T	T	C	C	C	C	C	C	C	C	C	C	C	C	T	C	C	C	C	C	C	T	C	C	C	C
AX-86178320	C/T	1A	309401536	+	NA	NA	NA	NA	NA	NA	C	C	T	T	T	T	C	T	C	C	C	C	C	C	C	C	T	T	C	C	C	C	T	T	C	T	T	C	T	T	T	T	T	T	C	T	T	T	T
AX-86169866	A/G	1A	309401684	+	NA	NA	NA	NA	NA	NA	A	A	A	A	A	A	A	A	A	A	G	G	A	G	G	A	A	A	A	A	A	A	A	A	A	A	A	G	A	A	A	A	A	A	G	A	A	A	A
AX-111233381	C/T	1A	310007405	+	NA	NA	NA	NA	NA	NA	C	C	C	C	C	C	C	C	C	C	T	T	C	T	T	C	C	C	C	C	C	C	C	C	C	C	C	T	C	C	C	C	C	C	T	C	C	C	C
AX-109446373	C/T	1A	310255647	+	NA	NA	NA	NA	NA	NA	C	C	C	C	T	T	C	C	C	C	C	C	C	C	C	C	C	C	C	C	C	C	C	C	C	C	C	C	C	C	C	C	C	C	C	C	C	C	T
AX-111609101	C/T	1A	310539740	+	NA	NA	NA	NA	NA	NA	C	C	C	C	C	C	C	C	C	C	T	T	C	T	T	C	C	C	C	C	C	C	C	C	C	C	C	T	C	C	C	C	C	C	T	C	C	C	C
AX-109391662	A/G	1A	311107797	+	NA	NA	NA	NA	NA	NA	A	A	A	A	G	G	A	A	A	A	A	A	A	A	A	A	A	A	A	A	A	A	A	A	A	A	A	A	A	A	A	A	A	A	A	A	A	A	G
AX-109928651	G/A	1A	311379010	+	NA	NA	NA	NA	NA	NA	G	G	G	G	A	A	G	G	G	G	G	G	G	G	G	G	G	G	G	G	G	G	G	G	G	G	G	G	G	G	G	G	G	G	G	G	G	G	A
AX-111469113	C/A	1A	311765580	+	NA	NA	NA	NA	NA	NA	C	C	C	C	C	C	C	C	C	C	A	A	C	A	A	C	C	C	C	C	C	C	C	C	C	C	C	A	C	C	C	C	C	C	A	C	C	C	C
AX-110994043	C/T	1A	311810949	+	NA	NA	NA	NA	NA	NA	C	C	C	C	T	T	C	C	C	C	C	C	C	C	C	C	C	C	C	C	C	C	C	C	C	C	C	C	C	C	C	C	C	C	C	C	C	C	T
AX-110931640	C/A	1A	311844480	+	NA	NA	NA	NA	NA	NA	C	C	C	C	C	C	C	C	C	C	A	A	C	A	A	C	C	C	C	C	C	C	C	C	C	C	C	A	C	C	C	C	C	C	A	C	C	C	C
AX-110368348	G/T	1A	311846987	+	NA	NA	NA	NA	NA	NA	G	G	G	G	G	G	G	G	G	G	T	T	G	T	T	G	G	G	G	G	G	G	G	G	G	G	G	T	G	G	G	G	G	G	T	G	G	G	G
AX-110451171	C/T	1A	312033296	+	NA	NA	NA	NA	NA	NA	C	C	C	C	C	C	C	C	C	C	T	T	C	T	T	C	C	C	C	C	C	C	C	C	C	C	C	T	C	C	C	C	C	C	T	C	C	C	C
AX-110553948	G/A	1A	312162541	+	NA	NA	NA	NA	NA	NA	G	G	G	G	G	G	G	G	G	G	A	A	G	A	A	G	G	G	G	G	G	G	G	G	G	G	G	A	G	G	G	G	G	G	A	G	G	G	G
AX-111032943	C/A	1A	312445425	+	NA	NA	NA	NA	NA	NA	C	C	C	C	C	C	C	C	C	C	A	A	C	A	A	C	C	C	C	C	C	C	C	C	C	N	C	A	C	C	C	C	N	C	A	C	C	C	C
AX-94580118	G/A	1A	312775453	+	NA	NA	NA	NA	NA	NA	G	G	G	G	A	N	G	G	G	G	G	G	G	G	G	G	G	G	G	G	G	G	G	G	G	G	G	G	G	G	G	G	G	G	G	G	G	G	A
AX-111498882	C/T	1A	312864335	+	NA	NA	NA	NA	NA	NA	T	T	C	C	T	T	T	C	T	N	C	C	T	C	C	T	C	C	T	T	T	T	C	C	T	C	C	C	C	C	C	C	C	C	C	C	C	C	T
AX-94760203	C/A	1A	313006866	+	NA	NA	NA	NA	NA	NA	C	C	C	C	C	C	C	C	C	C	A	A	C	A	A	C	C	C	C	C	C	C	C	C	C	C	C	A	C	C	C	C	C	C	A	C	C	C	C
AX-110633470	G/A	1A	313008911	+	NA	NA	NA	NA	NA	NA	G	G	G	G	A	A	G	G	G	G	G	G	G	G	G	G	G	G	G	G	G	G	G	G	G	G	G	G	G	G	G	G	G	G	G	G	G	G	A
AX-110588403	G/C	1A	313009586	+	NA	NA	NA	NA	NA	NA	G	G	G	G	G	G	G	G	G	G	C	C	G	C	C	G	G	G	G	G	G	G	G	G	G	G	G	C	G	G	G	G	G	G	C	G	G	G	G
AX-110434112	C/G	1A	313121935	+	NA	NA	NA	NA	NA	NA	C	C	C	C	C	C	C	C	C	C	G	G	C	G	G	C	C	C	C	C	C	C	C	C	C	C	C	G	C	C	C	C	C	C	G	C	C	C	C
AX-95685239	A/G	1A	313161496	+	NA	NA	NA	NA	NA	NA	A	A	A	A	G	G	A	A	A	A	A	A	A	A	A	A	A	A	A	A	A	A	A	A	A	A	A	A	A	A	A	A	A	A	A	A	A	A	G
AX-111197066	T/C	1A	313163086	+	NA	NA	NA	NA	NA	NA	T	T	C	C	C	C	T	C	T	T	T	T	T	T	T	T	C	C	T	T	T	T	C	C	T	C	C	T	C	C	C	C	C	C	T	C	C	C	C
AX-110946924	G/A	1A	313286072	+	NA	NA	NA	NA	NA	NA	G	G	G	G	A	A	G	G	G	G	G	G	G	G	G	G	G	G	G	G	G	G	G	G	G	G	G	G	G	G	G	G	G	G	G	G	G	G	A
AX-110367827	T/C	1A	313290045	+	NA	NA	NA	NA	NA	NA	T	T	T	T	C	C	T	T	T	T	T	T	T	T	T	T	T	T	T	T	T	T	T	T	T	T	T	T	T	T	T	T	T	T	T	T	T	T	C
AX-109330283	T/C	1A	313292588	+	NA	NA	NA	NA	NA	NA	T	T	T	T	T	T	T	T	T	T	C	C	T	C	C	T	T	T	T	T	T	T	T	T	T	T	T	C	T	T	T	T	T	T	C	T	T	T	T
AX-109347635	T/C	1A	313417632	+	NA	NA	NA	NA	NA	NA	C	C	T	T	C	C	C	T	C	C	T	T	C	T	T	C	T	T	C	C	C	C	T	T	C	T	T	T	T	T	T	T	T	T	T	T	T	T	C
AX-111620737	C/T	1A	313595383	+	NA	NA	NA	NA	NA	NA	C	C	C	C	T	T	C	C	C	C	C	C	C	C	C	C	C	C	C	C	C	C	C	C	C	C	C	C	C	C	C	C	C	C	C	C	C	C	T
AX-111102675	T/C	1A	313729211	+	NA	NA	NA	NA	NA	NA	T	T	T	T	C	C	T	T	T	T	T	T	T	T	T	T	T	T	T	T	T	T	T	T	T	T	T	T	T	T	T	T	T	T	T	T	T	T	C
AX-94665409	G/A	1A	313739027	+	NA	NA	NA	NA	NA	NA	G	G	G	G	G	G	G	G	G	G	A	A	G	A	A	G	G	G	G	G	G	G	G	G	G	G	G	A	G	G	G	G	G	G	A	G	G	G	G
AX-111046060	A/G	1A	313908204	+	NA	NA	NA	NA	NA	NA	A	A	A	A	G	G	A	A	A	A	A	A	A	A	A	A	A	A	A	A	A	A	A	A	A	A	A	A	A	A	A	A	A	A	A	A	A	A	G
AX-110448044	G/A	1A	313909794	+	NA	NA	NA	NA	NA	NA	G	G	G	G	A	A	G	G	G	G	G	G	G	G	G	G	G	G	G	G	G	G	G	G	G	G	G	G	G	G	G	G	G	G	G	G	G	G	A
AX-111003139	G/A	1A	314438579	+	NA	NA	NA	NA	NA	NA	G	G	G	G	G	G	G	G	G	G	A	A	G	A	A	G	G	G	G	G	G	G	G	G	G	G	G	A	G	G	G	G	G	G	A	G	G	G	G
AX-109293228	A/G	1A	314477501	+	NA	NA	NA	NA	NA	NA	G	G	A	A	G	G	G	A	G	N	A	A	R	A	A	N	A	A	G	G	G	G	A	A	G	A	A	A	A	A	A	A	A	A	A	A	A	A	G
AX-109827985	T/C	1A	314513338	+	NA	NA	NA	NA	NA	NA	T	T	T	T	T	T	T	T	T	T	C	C	T	C	C	T	T	T	T	T	T	T	T	T	T	T	T	C	T	T	T	T	T	T	C	T	T	T	T
AX-111510129	G/A	1A	314514738	+	NA	NA	NA	NA	NA	NA	G	R	G	G	A	A	R	G	G	G	G	G	G	G	G	G	G	G	G	G	G	G	G	G	G	G	G	G	G	G	G	G	G	G	G	G	G	G	A
AX-111718651	C/T	1A	314621849	+	NA	NA	NA	NA	NA	NA	C	C	C	C	C	C	C	C	C	C	T	T	C	T	T	C	C	C	C	C	C	C	C	C	C	C	C	T	C	C	C	C	C	C	T	C	C	C	C
AX-109950718	G/A	1A	314625871	+	NA	NA	NA	NA	NA	NA	G	G	G	G	A	A	G	G	G	G	G	G	G	G	G	G	G	G	G	G	G	G	G	G	G	G	G	G	G	G	G	G	G	G	G	G	G	G	A
AX-110019142	A/G	1A	314851579	+	NA	NA	NA	NA	NA	NA	A	A	A	A	G	G	A	A	A	A	A	A	A	A	A	A	A	A	A	A	A	A	A	A	A	A	A	A	A	A	A	A	A	A	A	A	A	A	G
AX-111212536	G/C	1A	314856383	+	NA	NA	NA	NA	NA	NA	N	N	G	G	C	C	C	G	C	N	G	G	C	G	G	C	G	G	C	C	N	C	G	G	C	G	G	G	G	G	G	G	G	G	G	G	G	G	C
AX-110425459	C/T	1A	314857205	+	NA	NA	NA	NA	NA	NA	T	T	C	C	T	T	T	C	T	T	C	C	T	C	C	T	C	C	T	T	T	T	C	C	T	C	C	C	C	C	C	C	C	C	C	C	C	C	T
AX-109042845	T/C	1A	314894039	+	NA	NA	NA	NA	NA	NA	T	T	T	T	C	C	T	T	T	T	T	T	T	T	T	T	T	T	T	T	T	T	T	T	T	T	T	T	T	T	T	T	T	T	T	T	T	T	C
AX-110653719	T/C	1A	315833326	+	NA	NA	NA	NA	NA	NA	C	C	T	T	C	C	C	T	C	C	T	T	C	T	T	C	T	T	C	C	C	C	T	T	C	T	T	T	T	T	T	T	T	T	T	T	T	T	C
AX-110977845	C/A	1A	316151009	+	NA	NA	NA	NA	NA	NA	C	C	C	C	A	A	C	C	C	C	C	C	C	C	C	C	C	C	C	C	C	C	C	C	C	C	C	C	C	C	C	C	C	C	C	C	C	C	A
AX-94406511	T/C	1A	316260417	+	NA	NA	NA	NA	NA	NA	T	T	T	T	T	T	T	T	T	T	T	T	T	T	T	T	T	T	T	T	T	T	T	T	T	T	T	T	T	T	T	T	T	T	T	T	T	T	T
AX-111034164	G/T	1A	316861419	+	NA	NA	NA	NA	NA	NA	G	G	G	G	T	T	G	G	G	G	G	G	G	G	G	G	G	G	G	G	G	G	G	G	G	G	G	G	G	G	G	G	G	G	G	G	G	G	T
AX-109852427	C/A	1A	317422671	+	NA	NA	NA	NA	NA	NA	C	C	C	C	C	C	C	C	C	C	A	A	C	A	A	C	C	C	C	C	C	C	C	C	C	C	C	A	C	C	C	C	C	C	A	C	C	C	C
AX-108756540	C/T	1A	319306585	+	NA	NA	NA	NA	NA	NA	C	C	C	C	T	T	C	C	C	C	C	C	C	C	C	C	C	C	C	C	C	C	C	C	C	C	C	C	C	C	C	C	C	C	C	C	C	C	T
AX-110376370	G/A	1A	319306813	+	NA	NA	NA	NA	NA	NA	G	G	G	G	A	A	G	G	G	G	G	G	G	G	G	G	G	G	G	G	G	G	G	G	G	G	G	G	G	G	G	G	G	G	G	G	G	G	A
AX-111591474	C/A	1A	319310632	+	NA	NA	NA	NA	NA	NA	C	C	C	C	C	C	C	C	C	C	A	A	C	A	A	C	C	C	C	C	C	C	C	C	C	C	C	A	C	C	C	C	C	C	A	C	C	C	C
AX-111700826	T/C	1A	319559756	+	NA	NA	NA	NA	NA	NA	C	C	T	T	T	T	C	T	C	C	T	T	C	T	T	C	T	T	C	C	C	C	T	T	C	T	T	T	T	T	T	T	T	T	T	T	T	T	T
AX-110078647	G/A	1A	319891001	+	NA	NA	NA	NA	NA	NA	A	A	G	G	G	G	A	G	A	A	G	G	A	G	G	A	G	G	A	A	A	A	G	G	A	G	G	G	G	G	G	G	G	G	G	G	G	G	G
AX-110621464	A/G	1A	320222175	+	NA	NA	NA	NA	NA	NA	G	G	A	A	A	A	G	A	G	G	A	A	G	A	A	G	A	A	G	G	G	G	A	A	G	A	A	A	A	A	A	A	A	A	A	A	A	A	A
AX-86173425	G/A	1A	320223727	+	NA	NA	NA	NA	NA	NA	G	G	G	G	G	G	G	G	G	G	G	G	G	G	G	G	G	G	G	G	G	G	G	G	G	G	G	G	G	G	G	G	G	G	G	G	G	G	G
AX-94907052	G/C	1A	320224045	+	NA	NA	NA	NA	NA	NA	C	C	G	G	G	G	C	G	C	C	G	G	C	G	G	C	G	G	C	C	C	C	G	G	C	G	G	G	G	G	G	G	G	G	G	G	G	G	G
AX-94397743	C/T	1A	320336750	+	NA	NA	NA	NA	NA	NA	T	T	C	C	C	C	T	C	T	T	C	C	T	C	C	T	C	C	T	T	T	T	C	C	T	C	C	C	C	C	C	C	C	C	C	C	C	C	C
AX-95082367	C/T	1A	333776320	+	NA	NA	NA	NA	NA	NA	C	C	C	C	T	T	C	C	C	C	T	T	C	T	T	C	C	C	C	C	C	C	C	C	C	C	C	T	C	C	C	C	C	C	T	C	C	C	T
AX-109310093	A/G	1A	336886023	+	NA	NA	NA	NA	NA	NA	A	A	A	A	A	A	A	A	A	A	A	A	A	A	A	A	A	A	A	A	A	A	A	A	A	A	A	A	A	A	A	A	A	A	A	A	A	A	A
AX-109921819	A/G	1A	336886763	+	NA	NA	NA	NA	NA	NA	A	A	A	A	A	A	A	A	A	A	A	A	A	A	A	A	A	A	A	A	A	A	A	A	A	A	A	A	A	A	A	A	A	A	A	A	A	A	A
AX-108744074	C/G	1A	337006362	+	NA	NA	NA	NA	NA	NA	C	C	C	C	C	C	C	C	C	C	C	C	C	C	C	C	C	C	C	C	C	C	C	C	C	C	C	C	C	C	C	C	C	C	C	C	C	C	C
AX-111451975	T/C	1A	337352570	+	NA	NA	NA	NA	NA	NA	T	T	T	T	T	T	T	T	T	T	T	T	T	T	T	T	T	T	T	T	T	T	T	T	T	T	T	T	T	T	T	T	T	T	T	T	T	T	T
AX-110007315	G/T	1A	337455235	+	NA	NA	NA	NA	NA	NA	G	G	G	G	G	G	G	G	G	G	G	G	G	G	G	G	G	G	G	G	G	G	G	G	G	G	G	G	G	G	G	G	G	G	G	G	G	G	G
AX-109977330	G/A	1A	337705896	+	NA	NA	NA	NA	NA	NA	G	G	G	G	G	G	G	G	G	G	G	G	G	G	G	G	G	G	G	G	G	G	G	G	G	G	G	G	G	G	G	G	G	G	G	G	G	G	G
AX-109878853	T/C	1A	337898160	+	NA	NA	NA	NA	NA	NA	T	T	T	T	T	T	T	T	T	T	T	T	T	T	T	T	T	T	T	T	T	T	T	T	T	T	T	T	T	T	N	T	T	T	T	T	T	T	T
AX-110099198	A/G	1A	337947727	+	NA	NA	NA	NA	NA	NA	A	A	A	A	A	A	A	A	A	A	A	A	A	A	A	A	A	A	A	A	A	A	A	A	A	A	A	A	A	A	A	A	A	A	A	A	A	A	A
AX-109005940	A/G	1A	337988008	+	NA	NA	NA	NA	NA	NA	A	A	A	A	A	A	A	A	A	A	A	A	A	A	A	A	A	A	A	A	A	A	A	A	A	A	A	A	A	A	A	A	A	A	A	A	A	A	A
AX-109925778	G/A	1A	338846222	+	NA	NA	NA	NA	NA	NA	G	G	G	G	A	A	G	G	G	G	A	A	G	A	A	G	G	G	G	G	G	G	G	G	G	G	G	A	G	G	G	G	G	G	A	G	G	G	A
AX-108852569	C/T	1A	339100657	+	NA	NA	NA	NA	NA	NA	C	C	C	C	T	T	C	C	C	C	T	T	C	T	T	C	C	C	C	C	C	C	C	C	C	C	C	T	C	C	C	C	C	C	T	C	C	C	T
AX-108943339	T/C	1A	339486740	+	NA	NA	NA	NA	NA	NA	T	T	T	T	C	C	T	T	T	T	C	C	T	C	C	T	T	T	T	T	T	T	T	T	T	T	T	C	T	T	T	T	T	T	C	T	T	T	C
AX-110506787	G/T	1A	339794635	+	NA	NA	NA	NA	NA	NA	G	G	G	G	T	T	G	G	G	G	T	T	G	T	T	G	G	G	G	G	G	G	G	G	G	G	G	T	G	G	G	G	N	G	T	G	G	G	T
AX-108905801	G/A	1A	340212518	+	NA	NA	NA	NA	NA	NA	G	G	G	G	A	A	G	G	G	G	A	A	G	A	A	G	G	G	G	G	G	G	G	G	G	G	G	A	G	G	G	G	G	G	A	G	G	G	A
AX-108858579	A/G	1A	340701630	+	NA	NA	NA	NA	NA	NA	A	A	A	A	G	G	A	A	A	A	G	G	A	G	G	A	A	A	A	A	A	A	A	A	A	A	A	G	A	A	A	A	A	A	G	A	A	A	G
AX-112289285	G/T	1A	342875420	+	NA	NA	NA	NA	NA	NA	G	G	G	G	T	T	G	G	N	G	T	T	G	T	T	G	G	G	G	G	G	G	G	G	G	G	G	T	G	G	G	N	G	G	T	G	G	G	T
AX-179558240	G/T	1A	342875420	+	NA	NA	NA	NA	NA	NA	G	G	G	G	T	T	G	G	G	G	T	T	G	T	T	G	G	G	G	G	G	G	G	G	N	N	N	T	T	G	N	G	N	G	T	G	G	G	T
AX-94719212	C/A	1A	343408813	+	NA	NA	NA	NA	NA	NA	C	C	C	C	A	A	C	C	C	C	A	A	C	A	A	C	C	C	C	C	C	C	C	C	C	C	C	A	C	C	C	C	C	C	A	C	C	C	A
AX-111589787	G/A	1A	343478045	+	NA	NA	NA	NA	NA	NA	G	G	G	G	A	A	G	G	G	G	A	A	G	A	A	G	G	G	G	G	G	G	G	G	G	G	G	A	G	G	G	G	G	G	A	G	G	G	A
AX-110570363	C/T	1A	343661308	+	NA	NA	NA	NA	NA	NA	C	C	C	C	T	T	C	C	C	C	T	T	C	T	T	C	C	C	C	C	C	C	C	C	C	C	C	T	C	C	C	C	C	C	T	C	C	C	T
AX-94946446	A/G	1A	343681229	+	NA	NA	NA	NA	NA	NA	A	A	A	A	G	G	A	A	A	A	A	A	A	A	G	A	A	A	A	A	A	A	G	A	A	A	A	A	A	A	A	G	G	A	A	A	A	G	G
AX-111531240	G/T	1A	344447000	+	NA	NA	NA	NA	NA	NA	G	G	G	G	T	T	G	G	G	G	T	T	G	T	T	G	G	G	G	G	G	G	G	G	G	G	G	T	G	G	G	G	G	G	T	G	G	G	T
AX-110928462	C/T	1A	344476672	+	NA	NA	NA	NA	NA	NA	C	C	C	C	T	T	C	C	C	C	T	T	C	T	T	C	C	C	C	C	C	C	C	C	C	C	C	T	C	C	C	C	C	C	T	C	C	C	T
AX-108881072	G/A	1A	344948322	+	NA	NA	NA	NA	NA	NA	G	G	G	G	A	A	G	G	G	G	A	A	G	A	A	G	G	G	G	G	G	G	G	G	G	G	G	A	G	G	G	G	G	G	A	G	G	G	A
AX-109996362	A/G	1A	345108262	+	NA	NA	NA	NA	NA	NA	A	A	A	A	G	G	A	A	A	A	N	G	A	G	G	A	A	A	A	A	A	A	A	A	A	A	A	G	A	A	A	A	A	A	G	A	A	A	G
AX-95653214	A/G	1A	345108262	+	NA	NA	NA	NA	NA	NA	A	A	A	A	G	G	A	A	A	A	G	G	A	G	G	A	A	A	A	A	A	A	A	A	A	A	A	G	A	A	N	A	A	A	G	A	A	A	G
AX-94912730	T/C	1A	345309209	+	NA	NA	NA	NA	NA	NA	T	T	T	T	C	C	T	T	N	T	C	C	T	C	C	T	T	T	T	T	T	T	T	T	T	T	T	C	T	T	T	T	T	T	C	T	T	T	C
AX-108860860	T/C	1A	345784099	+	NA	NA	NA	NA	NA	NA	T	T	T	T	C	C	T	T	T	T	C	C	N	C	C	T	T	T	T	T	T	T	T	T	T	N	T	C	T	T	T	T	Y	T	C	T	T	T	C
AX-109968145	C/T	1A	345785486	+	NA	NA	NA	NA	NA	NA	C	C	C	C	T	T	C	C	C	C	T	T	C	T	T	C	C	C	C	C	C	C	C	C	C	C	C	T	C	C	C	C	C	C	T	C	C	C	T
AX-94500378	T/G	1A	345786748	+	NA	NA	NA	NA	NA	NA	T	T	T	T	G	G	T	T	T	T	G	G	T	G	G	T	T	T	T	T	T	T	T	T	T	T	T	G	T	T	T	T	T	T	G	T	T	T	G
AX-95629738	T/G	1A	345786748	+	NA	NA	NA	NA	NA	NA	T	T	T	T	G	G	T	T	T	T	G	G	T	G	G	T	T	T	T	T	T	T	T	T	T	T	T	G	T	T	T	T	T	T	G	T	T	T	G
AX-109876087	A/G	1A	346464244	+	NA	NA	NA	NA	NA	NA	A	A	A	A	G	G	A	A	A	A	G	G	A	G	G	A	A	A	A	A	A	A	A	A	A	A	A	G	A	A	A	A	A	A	G	A	A	A	G
AX-89475672	G/A	1A	347633555	+	NA	NA	NA	NA	NA	NA	G	G	G	G	A	A	G	G	G	G	A	A	G	A	A	G	G	G	G	G	G	G	G	G	G	G	G	A	G	G	G	G	G	G	A	G	G	G	A
AX-179558305	G/A	1A	347634627	+	NA	NA	NA	NA	NA	NA	A	A	A	G	A	A	G	G	G	A	A	G	G	G	G	A	G	G	N	G	G	G	A	G	A	G	G	G	A	G	A	G	A	G	G	G	G	G	G
AX-108748978	T/C	1A	347919022	+	NA	NA	NA	NA	NA	NA	T	T	T	T	C	C	T	T	T	T	C	C	T	C	C	T	T	T	T	T	T	T	T	T	T	T	T	C	T	T	T	T	T	T	C	T	T	T	C
AX-179558675	T/C	1A	347919022	+	NA	NA	NA	NA	NA	NA	T	T	T	T	C	C	T	T	T	T	C	C	T	C	C	T	T	T	T	T	T	T	T	T	T	T	T	C	T	T	T	T	T	T	C	T	T	T	C
AX-109832482	C/A	1A	348682674	+	NA	NA	NA	NA	NA	NA	C	C	C	C	A	A	C	C	C	C	A	A	C	A	A	C	C	C	C	C	C	C	C	C	C	C	C	A	C	C	C	C	C	C	A	C	C	C	A
AX-108921683	C/T	1A	349351057	+	NA	NA	NA	NA	NA	NA	C	C	C	C	T	T	C	C	C	C	T	T	C	T	T	C	C	C	C	C	C	C	C	C	C	C	C	T	C	C	C	C	C	C	T	C	C	C	T
AX-111258903	G/A	1A	349388261	+	NA	NA	NA	NA	NA	NA	G	G	G	G	A	A	G	G	G	G	A	A	G	A	A	G	G	G	G	G	G	G	G	G	G	G	G	A	G	G	G	G	G	G	A	G	G	G	A
AX-110990436	C/A	1A	349517298	+	NA	NA	NA	NA	NA	NA	C	C	C	C	A	A	C	C	C	C	A	A	C	A	A	C	C	C	C	C	C	C	C	C	C	C	C	A	C	C	C	C	C	C	A	C	C	C	A
AX-94405126	C/T	1A	350006811	+	NA	NA	NA	NA	NA	NA	C	C	C	C	T	T	C	C	C	C	T	T	C	T	T	C	C	C	C	C	C	C	C	C	C	C	C	T	C	C	C	C	C	C	T	C	C	C	T
AX-95634789	C/T	1A	350006811	+	NA	NA	NA	NA	NA	NA	C	C	C	C	T	T	C	C	C	C	T	T	C	T	T	C	C	C	C	C	C	C	C	C	C	C	C	T	C	C	C	C	C	C	T	C	C	C	T
AX-112286799	G/A	1A	350007931	+	NA	NA	NA	NA	NA	NA	G	G	G	G	A	A	G	G	G	G	A	A	G	A	A	G	G	G	G	G	G	G	G	G	G	G	G	A	G	G	G	G	G	G	A	G	G	G	A
AX-95634788	G/A	1A	350007931	+	NA	NA	NA	NA	NA	NA	G	G	G	N	A	A	G	G	G	G	A	A	G	A	A	G	G	G	G	G	G	G	G	G	G	G	G	A	G	G	G	G	G	G	A	G	G	G	A
AX-94432952	C/G	1A	350009453	+	NA	NA	NA	NA	NA	NA	C	C	C	C	G	G	C	C	C	C	G	G	C	G	G	C	C	C	C	C	C	C	C	C	C	C	C	G	C	C	C	C	C	N	G	C	C	C	G
AX-94399186	T/C	1A	350395975	+	NA	NA	NA	NA	NA	NA	T	T	T	T	C	C	T	T	T	T	C	C	T	C	C	T	T	T	T	T	T	T	T	T	T	T	T	C	T	T	T	T	T	T	C	T	T	T	C
AX-94974219	T/C	1A	350403701	+	NA	NA	NA	NA	NA	NA	T	N	N	T	C	C	T	T	T	T	C	C	T	C	C	T	T	T	T	T	T	T	Y	T	T	T	T	C	T	T	T	T	T	T	C	T	T	T	C
AX-110014031	C/T	1A	350411181	+	NA	NA	NA	NA	NA	NA	C	C	C	C	T	T	C	C	C	C	T	T	C	T	T	C	C	C	C	C	C	C	C	C	C	C	C	T	C	C	C	C	C	C	T	C	C	C	T
AX-111535298	C/T	1A	350415375	+	NA	NA	NA	NA	NA	NA	C	C	C	C	T	T	C	C	C	C	T	T	C	T	T	C	C	C	C	C	C	C	C	C	C	C	C	T	C	C	C	C	C	C	T	C	C	C	T
AX-109877989	G/A	1A	350415417	+	NA	NA	NA	NA	NA	NA	G	G	G	G	A	A	G	G	G	G	A	A	G	A	A	G	G	G	G	G	G	G	G	G	G	G	G	A	G	G	G	G	G	G	A	G	G	G	A
AX-110632688	G/T	1A	351342110	+	NA	NA	NA	NA	NA	NA	G	G	G	G	T	T	G	G	G	G	T	T	G	T	T	G	G	G	G	G	G	G	G	G	G	G	G	T	G	G	G	G	G	G	T	G	G	G	T
AX-108764693	C/A	1A	351499141	+	NA	NA	NA	NA	NA	NA	C	C	C	C	A	A	C	C	C	C	A	A	C	A	A	C	C	C	C	C	C	C	C	C	C	C	C	A	C	C	C	C	C	C	A	C	C	C	A
AX-94500893	G/A	1A	351600524	+	NA	NA	NA	NA	NA	NA	G	G	G	G	A	A	G	G	G	N	A	A	G	A	A	G	G	G	G	G	G	G	G	G	G	G	G	A	G	G	G	G	G	G	A	G	G	G	A
AX-111560538	C/A	1A	351863579	+	NA	NA	NA	NA	NA	NA	C	C	C	C	A	A	C	C	C	C	A	A	C	A	A	C	C	C	C	C	C	C	C	C	C	C	C	A	C	C	C	C	C	C	A	C	C	C	A
AX-111170598	T/C	1A	351864107	+	NA	NA	NA	NA	NA	NA	T	T	T	T	C	C	T	T	T	T	C	C	T	C	C	T	T	T	T	T	T	T	T	T	T	T	T	C	T	T	T	T	T	T	C	T	T	T	C
AX-179476133	G/A	1A	351882241	+	NA	NA	NA	NA	NA	NA	G	G	G	N	A	A	G	G	G	G	A	A	N	A	A	G	G	G	N	G	G	N	G	G	G	N	G	A	G	N	G	G	G	G	A	G	G	G	A
AX-94519347	T/A	1A	351882595	+	NA	NA	NA	NA	NA	NA	T	T	T	T	A	A	T	T	T	T	A	A	T	A	A	T	T	T	T	T	T	T	T	T	T	T	T	A	T	T	T	T	T	T	A	T	T	T	A
AX-86171851	G/A	1A	352137706	+	NA	NA	NA	NA	NA	NA	G	G	G	G	G	G	G	G	G	G	G	G	G	G	G	G	G	G	G	G	G	G	G	G	G	G	G	G	G	G	G	G	G	G	G	G	G	G	G
AX-111055136	T/C	1A	353250144	+	NA	NA	NA	NA	NA	NA	T	T	T	T	T	T	T	T	T	T	T	T	T	T	T	T	T	T	T	T	T	T	T	T	T	T	T	T	T	T	T	T	T	T	T	T	T	T	T
AX-94525103	A/T	1A	353256443	+	NA	NA	NA	NA	NA	NA	A	A	A	A	A	A	A	A	A	A	A	A	A	A	A	A	A	A	A	A	A	A	A	A	A	A	A	A	A	A	A	A	A	A	A	A	A	A	A
AX-86172926	G/T	1A	353628518	+	NA	NA	NA	NA	NA	NA	G	G	G	G	G	G	G	G	G	G	G	G	G	G	G	G	G	G	G	G	G	G	G	G	G	G	G	G	G	G	G	G	G	G	G	G	G	G	G
AX-109838823	G/A	1A	354944749	+	NA	NA	NA	NA	NA	NA	A	A	G	G	G	G	A	G	A	A	G	G	A	G	G	A	G	G	A	A	A	A	G	G	A	G	G	G	G	G	G	G	G	G	G	G	G	G	G
AX-109966891	A/G	1A	354956595	+	NA	NA	NA	NA	NA	NA	G	G	A	A	A	A	G	A	G	G	A	A	G	A	A	G	A	A	G	G	G	G	A	A	G	A	A	A	A	A	A	A	A	A	A	A	A	A	A
AX-109847276	G/A	1A	354960823	+	NA	NA	NA	NA	NA	NA	A	A	G	G	G	G	A	G	A	A	G	G	A	G	G	A	G	G	N	A	A	A	G	G	A	G	G	G	G	G	G	G	G	G	G	G	G	G	G
AX-108998585	T/C	1A	354961617	+	NA	NA	NA	NA	NA	NA	C	C	T	T	T	T	C	T	C	C	T	T	C	T	T	C	T	T	C	C	C	C	T	T	C	T	T	T	T	T	T	T	T	T	T	T	T	T	T
AX-108796805	T/C	1A	354980725	+	NA	NA	NA	NA	NA	NA	C	C	T	T	T	T	C	T	C	C	T	T	C	T	T	C	T	T	C	C	C	C	T	T	C	T	T	T	T	T	T	T	T	T	T	T	T	T	T
AX-108738344	A/G	1A	354985314	+	NA	NA	NA	NA	NA	NA	G	G	A	A	A	A	G	A	G	G	A	A	G	A	A	G	A	A	G	G	G	G	A	A	G	A	A	A	A	A	A	A	A	A	A	A	A	A	A
AX-94386081	C/T	1A	355323682	+	NA	NA	NA	NA	NA	NA	T	T	C	C	C	C	T	C	T	T	C	C	T	C	C	T	C	C	T	T	T	T	C	C	T	C	C	C	C	C	C	C	C	C	C	C	C	C	C
AX-179558324	C/A	1A	355324299	+	NA	NA	NA	NA	NA	NA	A	A	C	C	C	C	A	C	A	A	C	C	A	C	C	A	C	C	A	A	A	A	C	C	A	C	C	C	C	C	C	C	C	C	C	C	C	C	C
AX-95633613	C/A	1A	355324299	+	NA	NA	NA	NA	NA	NA	A	A	C	C	C	C	A	C	A	A	C	C	A	C	C	A	C	C	A	A	A	A	C	C	A	C	C	C	C	C	N	C	C	C	C	C	C	C	C
AX-110402102	G/C	1A	355326217	+	NA	NA	NA	NA	NA	NA	C	C	G	G	G	G	C	G	C	C	G	G	C	G	G	C	G	G	C	C	C	C	G	G	C	G	G	G	G	G	G	G	G	G	G	G	G	G	G
AX-112287866	T/G	1A	355335999	+	NA	NA	NA	NA	NA	NA	G	G	T	T	T	T	G	T	G	G	T	T	G	T	T	G	T	T	G	G	G	G	T	T	G	T	T	T	T	T	T	T	T	T	T	T	T	T	T
AX-95630759	T/G	1A	355335999	+	NA	NA	NA	NA	NA	NA	G	G	T	T	T	T	G	T	G	G	T	T	G	T	T	G	T	T	G	G	G	G	T	T	G	T	T	T	T	T	T	T	T	T	T	T	T	T	T
AX-89485097	A/G	1A	356470906	+	NA	NA	NA	NA	NA	NA	A	A	G	G	A	A	A	G	A	A	A	A	A	A	A	A	G	G	A	A	A	A	G	G	A	G	G	A	G	G	G	G	G	G	A	G	G	G	A
AX-111792031	A/G	1A	357555877	+	NA	NA	NA	NA	NA	NA	A	A	G	G	A	A	A	G	A	A	A	A	A	A	A	A	G	G	A	A	A	A	G	G	A	G	G	A	G	G	G	G	G	G	A	G	G	G	A
AX-110945768	A/G	1A	357782606	+	NA	NA	NA	NA	NA	NA	A	A	G	G	A	A	A	G	A	A	A	A	A	A	A	A	G	G	A	A	A	A	G	G	A	G	G	A	G	G	G	G	G	G	A	G	G	G	A
AX-110495007	T/C	1A	357809358	+	NA	NA	NA	NA	NA	NA	T	T	C	C	T	T	T	C	T	T	T	T	T	T	T	T	C	C	T	T	T	T	C	C	T	C	C	T	C	C	C	C	C	C	T	C	C	C	T
AX-94636081	A/G	1A	362620496	+	NA	NA	NA	NA	NA	NA	A	A	A	A	A	A	A	A	A	A	A	A	A	A	A	A	A	A	A	A	A	A	R	A	A	A	N	A	A	A	A	A	A	A	A	A	A	A	A
AX-94615576	G/C	1A	363452635	+	NA	NA	NA	NA	NA	NA	C	C	C	G	C	C	G	G	G	C	C	G	G	G	G	C	G	G	G	G	G	G	C	G	C	G	G	G	C	G	C	G	C	G	G	G	G	G	G
AX-109318272	A/C	1A	364788393	+	NA	NA	NA	NA	NA	NA	A	A	A	A	A	A	A	A	A	A	A	A	A	A	A	A	A	A	A	A	A	A	A	A	A	A	A	A	A	A	A	A	A	A	A	A	A	A	A
AX-109960352	A/G	1A	364888790	+	NA	NA	NA	NA	NA	NA	A	A	A	A	A	A	A	A	A	A	A	A	A	A	A	A	A	A	A	A	A	A	A	A	A	A	A	A	A	A	A	A	A	A	A	A	A	A	A
AX-109319362	G/A	1A	364891836	+	NA	NA	NA	NA	NA	NA	G	G	G	G	G	G	G	G	G	G	G	G	G	G	G	G	G	G	G	G	G	G	G	G	G	G	G	G	G	G	G	G	G	G	G	G	G	G	G
AX-94415624	A/G	1A	365508750	+	NA	NA	NA	NA	NA	NA	A	A	A	A	A	A	A	A	A	A	A	A	A	A	A	A	A	A	A	A	A	A	A	A	A	A	A	A	A	A	A	A	A	A	A	A	A	A	A
AX-95630626	A/G	1A	365508750	+	NA	NA	NA	NA	NA	NA	A	A	A	A	A	A	A	A	A	A	A	A	A	A	A	A	A	A	A	A	A	A	A	A	A	A	A	A	A	A	A	A	A	A	A	A	A	A	A
AX-95190148	G/A	1A	365618818	+	NA	NA	NA	NA	NA	NA	G	G	G	G	G	G	G	G	G	G	G	G	G	G	A	G	G	N	G	G	G	G	G	G	G	G	G	G	G	G	G	A	G	G	G	G	G	A	A
AX-111482821	T/C	1A	365717550	+	NA	NA	NA	NA	NA	NA	T	T	T	T	T	T	T	T	T	T	T	T	T	T	T	T	T	T	T	T	T	T	T	T	T	T	T	T	T	T	T	T	T	T	T	T	T	T	T
AX-111560847	T/C	1A	366103569	+	NA	NA	NA	NA	NA	NA	T	T	T	T	T	T	T	T	T	T	T	T	T	T	T	T	T	T	T	T	T	T	T	T	T	T	T	T	T	T	T	T	T	T	T	T	T	T	T
AX-111632641	C/T	1A	368531744	+	NA	NA	NA	NA	NA	NA	C	C	C	C	C	C	C	C	C	C	C	C	C	C	C	C	C	C	C	C	C	C	C	C	C	C	C	C	C	C	C	C	C	C	C	C	C	C	C
AX-95679484	T/C	1A	368826211	+	NA	NA	NA	NA	NA	NA	T	T	T	T	T	T	T	T	T	T	T	T	T	T	T	T	T	T	T	T	T	T	T	T	T	T	T	T	T	T	T	T	T	T	T	T	T	T	T
AX-108894614	G/A	1A	368858247	+	NA	NA	NA	NA	NA	NA	G	G	G	G	A	A	G	G	G	G	A	A	G	A	A	G	G	G	G	G	G	G	G	G	G	G	G	A	G	G	G	G	G	G	A	G	G	G	A
AX-109949978	C/T	1A	369601281	+	NA	NA	NA	NA	NA	NA	C	C	C	C	T	T	C	C	C	C	C	C	C	C	C	C	C	C	C	C	C	C	C	C	C	C	C	C	C	C	C	C	C	C	C	C	C	C	T
AX-109485299	G/A	1A	369694010	+	NA	NA	NA	NA	NA	NA	G	G	G	G	A	A	G	G	G	G	G	G	G	G	G	G	G	G	G	G	G	G	G	G	G	G	G	G	G	G	G	G	G	G	G	G	G	G	A
AX-86167428	A/G	1A	369697871	+	NA	NA	NA	NA	NA	NA	A	A	A	A	G	G	A	A	A	A	A	A	A	A	A	A	A	A	A	A	A	A	A	A	A	A	A	A	A	A	A	A	A	A	A	A	A	A	G
AX-86167429	A/G	1A	369697871	+	NA	NA	NA	NA	NA	NA	A	A	A	A	G	G	A	A	A	A	A	A	A	A	A	A	A	A	A	A	A	A	A	A	A	A	A	A	A	A	A	A	A	A	A	A	A	A	G
AX-179558627	A/C	1A	370093299	+	NA	NA	NA	NA	NA	NA	A	A	A	A	C	C	A	A	N	A	A	A	A	A	A	A	A	A	A	A	A	A	A	A	A	A	A	A	A	A	A	A	A	A	A	A	A	A	C
AX-108795109	G/A	1A	370095271	+	NA	NA	NA	NA	NA	NA	N	G	G	G	A	A	A	G	A	A	G	G	A	G	G	A	G	G	A	A	A	A	G	G	A	G	A	G	G	G	G	G	G	G	G	G	G	G	A
AX-110363707	C/G	1A	370097014	+	NA	NA	NA	NA	NA	NA	C	C	C	C	G	G	C	C	C	C	C	C	C	C	C	C	C	C	C	C	C	C	S	C	C	C	N	C	C	C	C	C	C	C	C	C	C	C	G
AX-179560095	T/C	1A	370107590	+	NA	NA	NA	NA	NA	NA	C	T	T	T	C	C	C	T	C	C	T	T	C	T	T	C	T	T	C	C	C	C	T	T	C	T	C	T	T	T	T	T	T	T	T	T	T	T	C
AX-94517594	T/C	1A	370107590	+	NA	NA	NA	NA	NA	NA	C	T	T	T	C	C	C	T	C	C	T	T	C	T	T	C	T	T	C	C	C	C	T	T	C	T	C	T	T	T	T	T	T	T	T	T	T	T	C
AX-110035801	T/C	1A	371080282	+	NA	NA	NA	NA	NA	NA	T	T	T	T	C	C	T	T	T	T	T	T	T	T	T	T	T	T	T	T	T	T	T	T	T	T	T	T	T	T	T	T	T	T	T	T	T	T	C
AX-110013951	A/G	1A	371085777	+	NA	NA	NA	NA	NA	NA	A	A	A	A	G	G	A	A	A	A	A	A	A	A	A	A	A	A	A	A	A	A	A	A	A	A	A	A	A	A	A	A	A	A	A	A	A	A	G
AX-109291439	G/C	1A	371178502	+	NA	NA	NA	NA	NA	NA	G	G	G	G	C	C	G	G	G	G	G	G	G	G	G	G	G	G	G	G	G	G	G	G	G	G	G	G	G	G	G	G	G	G	G	G	G	G	C
AX-110462669	C/T	1A	371183065	+	NA	NA	NA	NA	NA	NA	C	C	C	C	T	T	C	C	C	C	C	C	C	C	C	C	C	N	C	C	C	C	C	C	C	C	C	C	C	C	C	C	C	C	C	C	C	C	T
AX-111074693	C/T	1A	371524647	+	NA	NA	NA	NA	NA	NA	C	C	C	C	T	T	C	C	C	C	C	C	C	C	C	C	C	C	C	C	C	C	C	C	C	C	C	C	C	C	C	C	C	C	C	C	C	C	T
AX-110440920	G/A	1A	371926540	+	NA	NA	NA	NA	NA	NA	G	G	G	G	A	A	G	G	G	G	G	G	G	G	G	G	G	G	G	G	G	G	G	G	G	G	G	G	G	G	G	G	G	G	G	G	G	G	A
AX-108956678	T/C	1A	371961580	+	NA	NA	NA	NA	NA	NA	T	T	T	T	C	C	T	T	T	T	T	T	T	T	T	T	T	T	T	T	T	T	T	T	T	T	T	T	T	T	T	T	T	T	T	T	T	T	C
AX-111542950	C/T	1A	372263744	+	NA	NA	NA	NA	NA	NA	C	C	C	C	T	T	C	C	C	C	C	C	C	C	C	C	C	C	C	C	C	C	C	C	C	C	C	C	C	C	C	C	C	C	C	C	C	C	T
AX-94441027	C/T	1A	372467945	+	NA	NA	NA	NA	NA	NA	C	C	C	C	T	T	C	C	C	C	C	C	C	C	C	C	C	C	C	C	C	C	C	C	C	C	C	C	C	C	C	C	C	C	C	C	C	C	T
AX-110720323	G/A	1A	372548909	+	NA	NA	NA	NA	NA	NA	G	G	G	G	A	A	G	G	G	G	G	G	G	G	G	G	G	G	G	G	G	G	G	G	G	G	G	G	G	G	G	G	G	G	G	G	G	G	A
AX-110420974	C/T	1A	372625225	+	NA	NA	NA	NA	NA	NA	C	C	C	C	T	T	C	C	C	C	C	C	C	C	C	C	C	C	C	C	C	C	C	C	C	C	C	C	C	C	C	C	C	C	C	C	C	C	T
AX-111005170	T/C	1A	373265352	+	NA	NA	NA	NA	NA	NA	T	T	T	T	C	C	T	T	T	T	T	T	T	T	T	T	T	T	T	T	T	T	T	T	T	T	T	T	T	T	T	T	T	T	T	T	T	T	C
AX-108834933	T/C	1A	373326750	+	NA	NA	NA	NA	NA	NA	T	T	T	T	C	C	T	T	T	T	T	T	T	T	T	T	T	T	T	T	T	T	T	T	T	T	T	T	T	T	T	T	T	T	T	T	T	T	C
AX-110707098	T/C	1A	373398721	+	NA	NA	NA	NA	NA	NA	T	T	T	T	C	C	T	T	T	T	T	T	T	T	T	T	T	T	T	T	T	T	T	T	T	T	T	T	T	T	T	T	T	T	T	T	T	T	C
AX-109288149	C/A	1A	373464255	+	NA	NA	NA	NA	NA	NA	C	C	C	C	A	A	C	C	C	C	C	C	C	C	C	C	C	C	C	C	C	C	C	C	C	C	C	C	C	C	C	C	C	C	C	C	C	C	A
AX-108960548	C/T	1A	373464548	+	NA	NA	NA	NA	NA	NA	C	C	C	C	T	T	C	C	C	C	C	C	C	C	C	C	C	C	C	C	C	C	C	C	C	C	C	C	C	C	C	C	C	C	C	C	C	C	T
AX-108908911	G/A	1A	373464885	+	NA	NA	NA	NA	NA	NA	G	G	G	G	A	A	G	G	G	G	G	G	G	G	G	G	G	G	G	G	G	G	G	G	G	G	G	G	G	G	G	G	G	G	G	G	G	G	A
AX-111065621	C/T	1A	373502418	+	NA	NA	NA	NA	NA	NA	C	C	C	C	T	T	C	C	C	C	C	C	C	C	C	C	C	C	C	C	C	C	C	C	C	C	C	C	C	C	C	C	C	C	C	C	C	C	T
AX-110577138	C/T	1A	373536664	+	NA	NA	NA	NA	NA	NA	C	C	C	C	T	T	C	C	C	C	C	C	C	C	C	C	C	C	C	C	C	C	C	C	C	C	C	C	C	C	C	C	C	C	C	C	C	C	T
AX-110919528	A/G	1A	373764303	+	NA	NA	NA	NA	NA	NA	A	A	A	A	G	G	A	A	A	A	A	A	A	A	A	A	A	A	A	A	A	A	A	A	A	A	A	A	A	A	A	A	A	A	A	A	A	A	G
AX-109399717	C/T	1A	373784238	+	NA	NA	NA	NA	NA	NA	C	C	C	C	T	T	C	C	C	C	C	C	C	C	C	C	C	C	C	C	C	C	C	C	C	C	C	C	C	C	C	C	C	C	C	C	C	C	T
AX-108904016	G/C	1A	373824945	+	NA	NA	NA	NA	NA	NA	G	G	G	G	C	C	G	G	G	G	G	G	G	G	G	G	G	G	G	G	G	G	G	G	G	G	G	G	G	G	G	G	G	G	G	G	G	G	C
AX-110368637	A/G	1A	374131329	+	NA	NA	NA	NA	NA	NA	A	A	A	A	G	G	A	A	A	A	A	A	A	A	A	A	A	A	A	A	A	A	A	A	A	A	A	A	A	A	A	A	A	A	A	A	A	A	G
AX-110919544	G/A	1A	374133776	+	NA	NA	NA	NA	NA	NA	G	G	G	G	A	A	G	G	G	G	G	G	G	G	G	G	G	G	G	G	G	G	G	G	G	G	G	G	G	G	G	G	G	G	G	G	G	G	A
AX-110377012	T/C	1A	374146935	+	NA	NA	NA	NA	NA	NA	T	T	T	T	C	C	T	T	T	T	T	T	T	T	T	T	T	T	T	T	T	T	T	T	T	T	T	T	T	T	T	T	T	T	T	T	T	T	C
AX-108832737	A/G	1A	374167009	+	NA	NA	NA	NA	NA	NA	A	A	A	A	G	G	A	A	A	A	A	A	A	A	A	A	A	A	A	A	A	A	A	A	A	A	A	A	A	A	A	A	A	A	A	A	A	A	G
AX-109981727	C/T	1A	374168017	+	NA	NA	NA	NA	NA	NA	C	C	C	C	T	T	C	C	C	C	C	C	C	C	C	C	C	C	C	C	C	C	C	C	C	C	C	C	C	C	C	C	C	C	C	C	C	C	T
AX-110109082	C/A	1A	374220000	+	NA	NA	NA	NA	NA	NA	C	C	C	C	A	A	C	C	C	C	C	C	C	C	C	C	C	C	C	C	C	C	C	C	C	C	C	C	C	C	C	C	C	C	C	C	C	C	A
AX-179559839	T/C	1A	374568772	+	NA	NA	NA	NA	NA	NA	T	T	T	T	C	C	T	T	T	T	T	T	T	T	T	T	T	T	T	T	T	T	T	T	T	T	T	T	T	T	T	T	T	T	T	T	T	T	C
AX-95631684	T/C	1A	374568772	+	NA	NA	NA	NA	NA	NA	T	T	T	T	C	C	T	T	T	T	T	T	T	T	T	T	T	T	T	T	T	T	T	T	T	T	T	T	T	T	T	T	T	T	T	T	T	T	C
AX-95653084	G/A	1A	374689384	+	NA	NA	NA	NA	NA	NA	G	G	G	G	A	A	G	G	G	G	G	G	G	G	G	G	G	G	G	G	G	G	G	G	G	G	G	G	G	G	G	G	G	G	G	G	G	G	A
AX-109377539	A/G	1A	374692693	+	NA	NA	NA	NA	NA	NA	A	A	A	A	G	G	A	A	A	A	A	A	A	A	A	A	A	A	A	A	A	A	A	A	A	A	A	A	A	A	A	A	A	A	A	A	A	A	G
AX-110026287	C/T	1A	374775771	+	NA	NA	NA	NA	NA	NA	C	C	C	C	T	T	C	C	C	C	C	C	C	C	C	C	C	C	C	C	C	C	C	C	C	C	C	C	C	C	C	C	C	C	C	C	C	C	T
AX-109274688	G/A	1A	374776316	+	NA	NA	NA	NA	NA	NA	G	G	G	G	A	A	G	G	G	G	G	G	G	G	G	G	G	G	G	G	G	G	G	G	G	G	G	G	G	G	G	G	G	G	G	G	G	G	A
AX-110448986	C/T	1A	374947483	+	NA	NA	NA	NA	NA	NA	C	C	C	C	T	T	C	C	C	C	C	C	C	C	C	C	C	C	C	C	C	C	C	C	C	C	C	C	C	C	C	C	C	C	C	C	C	C	T
AX-109378522	T/C	1A	374951296	+	NA	NA	NA	NA	NA	NA	T	T	T	T	C	C	T	T	T	T	T	T	T	T	T	T	T	T	T	T	T	T	T	T	T	T	T	T	T	T	T	T	T	T	T	T	T	T	C
AX-111075850	G/A	1A	374962116	+	NA	NA	NA	NA	NA	NA	G	G	G	G	A	A	G	G	G	G	G	G	G	G	G	G	G	G	G	G	G	G	G	G	G	G	G	G	G	G	G	G	G	G	G	G	G	G	A
AX-109368678	T/C	1A	375012155	+	NA	NA	NA	NA	NA	NA	T	T	T	T	C	C	T	T	T	T	T	T	T	T	T	T	T	T	T	T	T	T	T	T	T	T	T	T	T	T	T	T	N	T	T	T	T	T	C
AX-95244447	T/C	1A	375016191	+	NA	NA	NA	NA	NA	NA	T	T	T	T	C	C	T	T	T	T	T	T	T	T	T	T	T	T	T	T	T	T	T	T	T	T	T	T	T	T	T	T	T	T	T	T	T	T	C
AX-110491273	G/A	1A	375111126	+	NA	NA	NA	NA	NA	NA	G	G	G	G	A	A	G	G	G	G	G	G	G	G	G	G	G	G	G	G	G	G	G	G	G	G	G	G	G	G	G	G	G	G	G	G	G	G	A
AX-111165959	C/T	1A	375111899	+	NA	NA	NA	NA	NA	NA	C	C	C	C	T	T	C	C	C	C	C	C	C	C	C	C	C	C	C	C	C	C	C	C	C	C	C	C	C	C	C	C	C	C	C	C	C	C	T
AX-109983041	C/G	1A	375115176	+	NA	NA	NA	NA	NA	NA	C	C	C	C	G	G	C	C	C	C	C	C	C	C	C	C	C	C	C	C	C	C	C	C	C	C	C	C	C	C	C	C	C	C	C	C	C	C	G
AX-108761765	C/G	1A	375116180	+	NA	NA	NA	NA	NA	NA	C	C	C	C	G	G	C	C	C	C	C	C	C	C	C	C	C	C	C	C	C	C	C	C	C	C	C	C	C	C	C	C	C	C	C	C	C	C	G
AX-94621604	C/G	1A	375475180	+	NA	NA	NA	NA	NA	NA	C	C	C	C	G	G	C	C	C	C	C	C	C	C	C	C	C	C	C	C	C	C	C	C	C	C	C	C	C	C	C	C	C	C	C	C	C	C	G
AX-110580405	C/T	1A	375476141	+	NA	NA	NA	NA	NA	NA	C	C	C	C	T	T	C	C	C	C	C	C	C	C	C	C	C	C	C	C	C	C	C	C	C	C	C	C	C	C	C	C	C	C	C	C	C	C	T
AX-108849458	C/A	1A	375476275	+	NA	NA	NA	NA	NA	NA	C	C	C	C	A	A	C	C	C	C	C	C	C	C	C	C	C	C	C	C	C	C	C	C	C	C	C	C	C	C	C	C	C	C	C	C	C	C	A
AX-110129617	C/T	1A	375841534	+	NA	NA	NA	NA	NA	NA	C	C	C	C	T	T	C	C	C	C	C	C	C	C	C	C	C	C	C	C	C	C	C	C	C	C	C	C	C	C	C	C	C	C	C	C	C	C	T
AX-109443579	C/T	1A	375896122	+	NA	NA	NA	NA	NA	NA	C	C	C	C	T	T	C	C	C	C	C	C	C	C	C	C	C	C	C	C	C	C	C	C	C	C	C	C	C	C	C	C	C	C	C	C	C	C	T
AX-110473691	C/T	1A	375900558	+	NA	NA	NA	NA	NA	NA	C	C	C	C	T	T	C	C	C	C	C	C	C	C	C	C	C	C	C	C	C	C	C	C	C	C	C	C	C	C	C	C	C	C	C	C	C	C	T
AX-111628018	G/A	1A	375959021	+	NA	NA	NA	NA	NA	NA	G	G	G	G	A	A	G	G	G	G	G	G	G	G	G	G	G	G	G	G	G	G	G	G	G	G	G	G	G	G	G	G	G	G	G	G	G	G	A
AX-109286534	C/G	1A	376021828	+	NA	NA	NA	NA	NA	NA	C	C	C	C	G	G	C	C	C	C	C	C	C	C	C	C	C	C	C	C	C	C	C	C	C	C	C	C	C	C	C	C	C	C	C	C	C	C	G
AX-111600219	C/T	1A	376098201	+	NA	NA	NA	NA	NA	NA	C	C	C	C	T	T	C	C	C	C	C	C	C	C	C	C	C	C	C	C	C	C	C	C	C	C	C	C	C	C	C	C	C	C	C	C	C	C	T
AX-111034865	T/C	1A	376135930	+	NA	NA	NA	NA	NA	NA	T	T	T	T	C	C	T	T	T	T	T	T	T	T	T	T	T	T	T	T	T	T	T	T	T	T	T	T	T	T	T	T	T	T	T	T	T	T	C
AX-109817156	G/T	1A	376505383	+	NA	NA	NA	NA	NA	NA	G	G	G	G	T	T	G	G	G	G	G	G	G	G	G	G	G	G	G	G	G	G	G	G	G	G	G	G	G	G	G	G	G	G	G	G	G	G	T
AX-95652656	C/A	1A	376670500	+	NA	NA	NA	NA	NA	NA	C	C	C	C	C	C	C	C	C	C	C	C	C	C	A	C	C	C	C	C	C	C	C	C	C	C	C	C	C	C	C	C	C	C	C	C	C	A	A
AX-111485910	C/T	1A	376991964	+	NA	NA	NA	NA	NA	NA	C	C	C	C	T	T	C	C	C	C	C	C	C	C	C	C	C	C	C	C	C	C	C	C	C	C	C	C	C	C	C	C	C	C	C	C	C	C	T
AX-109328653	A/C	1A	377002204	+	NA	NA	NA	NA	NA	NA	A	A	A	A	C	C	A	A	A	A	A	A	A	A	A	A	A	A	A	A	A	A	A	A	A	A	A	A	A	A	A	A	A	A	A	A	A	A	C
AX-110098316	T/C	1A	377003277	+	NA	NA	NA	NA	NA	NA	T	T	T	T	C	C	T	T	T	T	T	T	T	T	T	T	T	T	T	T	T	T	T	T	T	T	T	T	T	T	T	T	T	T	T	T	T	T	C
AX-108729253	A/G	1A	377003543	+	NA	NA	NA	NA	NA	NA	A	A	A	A	G	G	A	A	A	A	A	A	A	A	A	A	A	A	A	A	A	A	A	A	A	A	A	A	A	A	A	N	A	A	N	A	A	A	G
AX-108766638	T/C	1A	377003739	+	NA	NA	NA	NA	NA	NA	T	T	T	T	C	C	T	T	T	T	T	T	T	T	T	T	T	T	T	T	T	T	T	T	T	T	T	T	T	T	T	T	T	T	T	T	T	T	C
AX-95178074	A/G	1A	377027087	+	NA	NA	NA	NA	NA	NA	A	A	A	A	A	A	G	G	G	A	A	A	G	A	G	A	G	A	A	A	A	A	A	G	A	A	G	A	A	A	A	A	G	G	A	G	G	G	G
AX-110542614	C/T	1A	377036155	+	NA	NA	NA	NA	NA	NA	C	C	C	C	T	T	C	C	C	C	C	C	C	C	C	C	C	C	C	C	C	C	C	C	C	C	C	C	C	C	C	C	C	C	C	C	C	C	T
AX-109931799	C/T	1A	377111571	+	NA	NA	NA	NA	NA	NA	C	C	C	C	T	T	C	C	C	C	C	C	C	C	C	C	C	C	C	C	C	C	C	C	C	C	C	C	C	C	C	C	C	C	C	C	C	C	T
AX-109384586	C/A	1A	377424638	+	NA	NA	NA	NA	NA	NA	C	C	C	C	A	A	C	C	C	C	C	C	C	C	C	C	C	C	C	C	C	C	C	C	C	C	C	C	C	C	C	C	C	C	C	C	C	C	A
AX-95629029	G/T	1A	377427976	+	NA	NA	NA	NA	NA	NA	G	G	G	G	T	T	G	G	G	G	G	G	G	G	G	G	G	G	G	G	G	G	G	G	G	G	G	G	G	G	G	G	G	G	G	G	G	G	T
AX-94555133	C/G	1A	377429611	+	NA	NA	NA	NA	NA	NA	C	C	C	C	G	G	C	C	C	C	C	C	C	C	C	C	C	C	C	C	C	C	C	C	C	C	C	C	C	C	C	C	C	C	C	C	C	C	G
AX-86178528	T/C	1A	377614234	+	NA	NA	NA	NA	NA	NA	T	T	T	T	C	C	T	T	T	T	T	T	T	T	T	T	T	T	T	T	T	T	T	T	T	T	T	T	T	T	T	T	T	T	T	T	T	T	C
AX-111745515	A/G	1A	377615144	+	NA	NA	NA	NA	NA	NA	A	A	A	A	G	G	A	A	A	A	A	A	A	A	A	A	A	A	A	A	A	A	A	A	A	A	A	A	A	A	A	A	A	A	A	A	A	A	G
AX-109076980	G/A	1A	378610438	+	NA	NA	NA	NA	NA	NA	G	G	G	G	A	A	G	G	G	G	G	G	G	G	G	G	G	G	G	G	G	G	G	G	G	G	G	G	G	G	G	G	G	G	G	G	G	G	A
AX-109490765	C/G	1A	378867711	+	NA	NA	NA	NA	NA	NA	C	C	C	C	G	G	C	C	C	C	C	C	C	C	C	C	C	C	C	C	C	C	C	C	C	C	C	C	C	C	C	C	C	C	C	C	C	C	G
AX-110982154	C/T	1A	379133919	+	NA	NA	NA	NA	NA	NA	C	C	C	C	T	T	C	C	C	C	C	C	C	C	C	C	C	C	C	C	C	C	C	C	C	C	C	C	C	C	C	C	C	C	C	C	C	C	T
AX-108776387	G/A	1A	380751300	+	NA	NA	NA	NA	NA	NA	G	G	G	G	A	A	G	G	G	G	G	G	G	G	G	G	G	G	G	G	G	G	G	G	G	G	G	G	G	G	G	G	G	G	G	G	G	G	A
AX-108837994	C/T	1A	380779305	+	NA	NA	NA	NA	NA	NA	C	C	C	C	T	T	C	C	C	C	C	C	C	C	C	C	C	C	C	C	C	C	C	C	C	C	C	C	C	C	C	C	C	C	C	C	C	C	T
AX-110073120	T/C	1A	380940162	+	NA	NA	NA	NA	NA	NA	T	T	T	T	C	C	T	T	T	T	T	T	T	T	T	T	T	T	T	T	T	T	T	T	T	T	T	T	T	T	T	T	T	T	T	T	T	T	C
AX-110076872	T/C	1A	380973276	+	NA	NA	NA	NA	NA	NA	T	T	T	T	C	C	T	T	T	T	T	T	T	T	T	T	T	T	T	T	T	T	T	T	T	T	T	T	T	T	T	T	T	T	T	T	T	T	C
AX-108728888	A/G	1A	381313725	+	NA	NA	NA	NA	NA	NA	A	A	A	A	G	G	A	A	A	A	A	A	A	A	A	A	A	A	A	A	A	A	A	A	A	A	A	A	A	A	A	A	A	A	A	A	A	A	G
AX-108980040	T/C	1A	381316214	+	NA	NA	NA	NA	NA	NA	T	T	T	T	C	C	T	T	T	T	T	T	T	T	T	T	T	T	T	T	T	T	T	T	T	T	T	T	T	T	T	T	T	T	T	T	T	T	C
AX-110495557	C/T	1A	381821399	+	NA	NA	NA	NA	NA	NA	C	C	C	C	T	T	C	C	C	C	C	C	C	C	C	C	C	C	C	C	C	C	C	C	C	C	C	C	C	C	C	C	C	C	C	C	C	C	T
AX-94423447	A/G	1A	381822406	+	NA	NA	NA	NA	NA	NA	A	A	A	A	G	G	A	A	A	A	A	A	A	A	A	A	A	A	A	A	A	A	A	A	A	A	A	A	A	A	A	A	A	A	A	A	A	A	G
AX-109863151	G/A	1A	382033563	+	NA	NA	NA	NA	NA	NA	G	G	G	G	A	A	G	G	G	G	G	G	G	G	G	G	G	G	G	G	G	G	G	G	G	G	G	G	G	G	G	G	G	G	G	G	G	G	A
AX-179560046	C/T	1A	382229667	+	NA	NA	NA	NA	NA	NA	C	C	C	C	T	T	C	C	C	C	C	C	C	C	C	C	C	C	C	C	C	C	C	C	C	C	C	C	C	C	C	C	C	C	C	C	C	C	T
AX-89452326	T/C	1A	382233159	+	NA	NA	NA	NA	NA	NA	T	T	T	T	C	C	T	T	T	T	T	T	T	T	T	T	T	T	T	T	T	T	T	T	T	T	T	T	T	T	T	T	T	T	T	T	T	T	C
AX-111638846	G/C	1A	382249428	+	NA	NA	NA	NA	NA	NA	G	G	G	G	C	C	G	G	G	G	G	G	G	G	G	G	G	G	G	G	G	G	G	G	G	G	G	G	G	G	G	G	G	G	G	G	G	G	C
AX-110038261	G/A	1A	382256750	+	NA	NA	NA	NA	NA	NA	G	G	G	G	A	A	G	G	G	G	G	G	G	G	G	G	G	G	G	G	G	G	G	G	G	G	G	G	G	G	G	G	G	G	G	G	G	G	A
AX-95679558	T/C	1A	382740093	+	NA	NA	NA	NA	NA	NA	T	T	T	T	C	C	T	T	T	T	T	T	T	T	T	T	T	T	T	T	T	T	T	T	T	T	T	T	T	T	T	T	T	T	T	T	T	T	C
AX-108969356	G/T	1A	384290150	+	NA	NA	NA	NA	NA	NA	G	G	G	G	T	T	G	G	G	G	G	G	G	G	G	G	G	G	G	G	G	G	G	G	G	G	G	G	G	G	G	G	G	G	G	G	G	G	T
AX-109482870	C/T	1A	384821889	+	NA	NA	NA	NA	NA	NA	C	C	C	C	T	T	C	C	C	C	C	C	C	C	C	C	C	C	C	C	C	C	C	C	C	C	C	C	C	C	C	C	C	C	C	C	C	C	T
AX-109901400	G/T	1A	385276945	+	NA	NA	NA	NA	NA	NA	G	G	G	G	T	T	G	G	G	G	G	G	G	G	G	G	G	G	G	G	G	G	G	G	G	G	G	G	G	G	G	G	G	G	G	G	G	G	T
AX-109909392	T/G	1A	385349643	+	NA	NA	NA	NA	NA	NA	T	T	T	T	G	G	T	T	T	T	T	T	T	T	T	T	T	T	T	T	T	T	T	T	T	T	T	T	T	T	T	T	T	T	T	T	T	T	G
AX-94947927	T/C	1A	385355602	+	NA	NA	NA	NA	NA	NA	T	T	T	T	C	C	T	T	T	T	T	T	T	T	T	T	T	T	T	T	T	T	T	T	T	T	T	T	T	T	T	T	T	T	T	T	T	T	C
AX-95629056	T/C	1A	385355602	+	NA	NA	NA	NA	NA	NA	T	T	T	T	C	C	T	T	T	T	T	T	T	T	T	T	T	T	T	T	T	T	T	T	T	T	T	T	T	T	T	T	T	T	T	T	T	T	C
AX-111512467	A/G	1A	385658489	+	NA	NA	NA	NA	NA	NA	A	A	A	A	G	G	A	A	A	A	A	A	A	A	A	A	A	A	A	A	A	A	A	A	A	A	A	A	A	A	A	A	A	A	A	A	A	A	G
AX-110070883	A/G	1A	385661679	+	NA	NA	NA	NA	NA	NA	A	A	A	A	G	G	A	A	A	A	A	A	A	A	A	A	A	A	A	A	A	A	A	A	A	A	A	A	A	A	A	A	A	A	A	A	A	A	G
AX-110923597	A/G	1A	385666959	+	NA	NA	NA	NA	NA	NA	A	A	A	A	G	G	A	A	A	A	A	A	A	A	A	A	A	A	A	A	A	A	A	A	A	A	A	A	A	A	A	A	A	A	A	A	A	A	G
AX-110380811	G/A	1A	385669109	+	NA	NA	NA	NA	NA	NA	G	G	G	G	A	A	G	G	G	G	G	G	G	G	G	G	G	G	G	G	G	G	G	G	G	G	G	G	G	G	G	G	G	G	G	G	G	G	A
AX-108846522	G/A	1A	385671008	+	NA	NA	NA	NA	NA	NA	G	G	G	G	A	A	G	G	G	G	G	G	G	G	G	G	G	G	G	G	G	G	G	G	G	G	G	G	G	G	G	G	G	G	G	G	G	G	A
AX-108819075	C/T	1A	385883729	+	NA	NA	NA	NA	NA	NA	C	C	C	C	T	T	C	C	C	C	C	C	C	C	C	C	C	C	C	C	C	C	C	C	C	C	C	C	C	C	C	C	C	C	C	C	C	C	T
AX-111025953	C/T	1A	385886034	+	NA	NA	NA	NA	NA	NA	C	C	C	C	T	T	C	C	C	C	C	C	C	C	C	C	C	C	C	C	C	C	C	C	C	C	C	C	C	C	C	C	C	C	C	C	C	C	T
AX-111449957	G/T	1A	386435106	+	NA	NA	NA	NA	NA	NA	G	G	G	G	T	T	G	G	G	G	G	G	G	G	G	G	G	G	G	G	G	G	G	G	G	G	G	G	G	G	G	G	G	G	G	G	G	G	T
AX-108974070	C/T	1A	387489034	+	NA	NA	NA	NA	NA	NA	C	C	C	C	T	T	C	C	C	C	T	T	C	T	T	C	C	C	C	C	C	C	C	C	C	C	C	T	C	C	C	C	C	C	T	C	C	C	T
AX-94511465	G/T	1A	387517166	+	NA	NA	NA	NA	NA	NA	G	G	G	G	T	T	G	G	G	G	T	T	G	T	T	G	G	G	G	G	G	G	G	G	G	G	G	T	G	G	G	G	G	G	T	G	G	G	T
AX-95684636	G/T	1A	387517166	+	NA	NA	NA	NA	NA	NA	G	G	G	G	T	T	G	G	G	G	T	T	G	T	T	G	G	G	G	G	G	G	G	G	G	G	G	T	G	G	G	G	G	G	T	G	G	G	T
AX-110483667	G/T	1A	387522370	+	NA	NA	NA	NA	NA	NA	G	G	G	G	T	T	G	G	G	G	T	T	G	T	T	G	G	G	G	G	G	G	G	G	G	G	G	T	G	G	G	G	G	G	T	G	G	G	T
AX-109277858	C/T	1A	387830331	+	NA	NA	NA	NA	NA	NA	C	C	C	C	T	T	C	C	C	C	T	T	C	T	T	C	C	C	C	C	C	C	C	C	C	C	C	T	C	C	C	C	C	C	T	C	C	C	T
AX-111579616	G/C	1A	388007336	+	NA	NA	NA	NA	NA	NA	G	G	G	G	C	C	G	G	G	G	C	C	G	C	C	G	G	G	G	G	G	G	G	G	G	G	G	C	G	G	G	G	G	G	C	G	G	G	C
AX-111460876	G/A	1A	388152337	+	NA	NA	NA	NA	NA	NA	G	G	G	G	A	A	G	G	G	G	A	A	G	A	A	G	G	G	G	G	G	G	G	G	G	G	G	A	G	G	G	G	G	G	A	G	G	G	A
AX-108974556	T/C	1A	388159777	+	NA	NA	NA	NA	NA	NA	T	T	T	T	C	C	T	T	T	T	C	C	T	C	C	T	T	T	T	T	T	T	T	T	T	T	T	C	T	T	T	T	T	T	C	T	T	T	C
AX-112291160	T/C	1A	388159777	+	NA	NA	NA	NA	NA	NA	T	T	T	T	C	C	T	T	T	T	C	C	T	C	C	T	T	T	T	T	T	T	T	T	T	T	T	C	T	T	T	T	T	T	C	T	T	T	C
AX-109433788	G/A	1A	388808063	+	NA	NA	NA	NA	NA	NA	G	G	G	G	A	A	G	G	G	G	A	A	G	A	A	G	G	G	G	G	G	G	G	G	G	G	G	A	G	G	G	G	G	G	A	G	G	G	A
AX-94449890	G/A	1A	388833853	+	NA	NA	NA	NA	NA	NA	G	G	G	G	G	G	A	A	A	G	G	G	A	G	A	G	A	G	G	G	G	G	G	A	G	G	A	G	G	G	G	A	G	A	G	A	A	A	A
AX-108742536	C/T	1A	389029091	+	NA	NA	NA	NA	NA	NA	C	C	C	C	T	T	C	C	C	C	T	T	C	T	T	C	C	C	C	C	C	C	C	C	C	C	C	T	C	C	C	C	C	C	T	C	C	C	T
AX-109901624	T/C	1A	389130158	+	NA	NA	NA	NA	NA	NA	T	T	T	T	C	C	T	T	T	T	C	C	T	C	C	T	T	T	T	T	T	T	T	T	T	T	T	C	T	T	T	T	T	T	C	T	T	T	C
AX-110478714	G/A	1A	389771998	+	NA	NA	NA	NA	NA	NA	G	G	G	G	A	A	G	G	G	G	G	G	G	G	G	G	G	G	G	G	G	G	G	G	G	G	G	G	G	G	G	G	G	G	G	G	G	G	A
AX-179392186	G/A	1A	390094537	+	NA	NA	NA	NA	NA	NA	G	G	G	G	A	A	G	G	G	G	A	A	G	A	A	G	G	G	G	G	G	G	G	G	G	G	G	A	G	G	G	G	G	N	A	G	G	G	A
AX-179558648	G/A	1A	390094537	+	NA	NA	NA	NA	NA	NA	G	G	G	G	A	A	G	G	G	G	A	A	G	A	A	G	G	G	G	G	G	G	G	N	G	G	G	A	G	G	G	G	G	G	A	G	G	G	A
AX-109374169	A/G	1A	391247594	+	NA	NA	NA	NA	NA	NA	A	A	A	A	G	G	A	A	A	A	G	G	A	G	G	A	A	A	A	A	A	A	A	A	A	A	A	G	A	A	A	A	A	A	G	A	A	A	G
AX-109428393	A/C	1A	392321338	+	NA	NA	NA	NA	NA	NA	A	A	A	A	C	C	A	A	A	A	C	C	A	C	C	A	A	A	A	A	A	A	A	A	A	A	A	C	A	A	A	A	A	A	C	A	A	A	C
AX-111072016	G/A	1A	392332931	+	NA	NA	NA	NA	NA	NA	G	G	G	G	A	A	G	G	G	G	A	A	G	A	A	G	G	G	G	G	G	G	G	G	G	G	G	A	G	G	G	G	G	G	A	G	G	G	A
AX-110923826	T/A	1A	392353473	+	NA	NA	NA	NA	NA	NA	T	T	T	T	A	A	T	T	T	T	A	A	T	A	A	T	T	T	T	T	T	T	T	T	T	T	T	A	T	T	T	T	N	T	A	T	T	T	A
AX-111629150	T/C	1A	392357313	+	NA	NA	NA	NA	NA	NA	T	T	T	T	C	C	T	T	T	T	C	C	T	C	C	T	T	T	T	T	T	T	T	T	T	T	T	C	T	T	T	T	T	T	C	T	T	T	C
AX-111053784	A/G	1A	392462848	+	NA	NA	NA	NA	NA	NA	A	A	A	A	G	G	A	A	A	A	G	G	A	G	G	A	A	A	A	A	A	A	A	A	A	A	A	G	A	A	A	A	A	A	G	A	A	A	G
AX-179558615	C/T	1A	392529388	+	NA	NA	NA	NA	NA	NA	C	C	C	C	T	T	C	C	C	C	T	T	C	T	T	C	C	C	C	C	C	C	C	C	C	C	C	T	C	C	C	C	C	C	T	C	C	C	T
AX-110026253	T/C	1A	392779535	+	NA	NA	NA	NA	NA	NA	T	T	T	T	C	C	T	T	T	T	C	C	T	C	C	T	T	T	T	T	T	T	T	T	T	T	T	C	T	T	T	T	T	T	C	T	T	T	C
AX-110068878	G/A	1A	393305191	+	NA	NA	NA	NA	NA	NA	G	G	G	G	A	A	G	G	G	G	A	A	G	A	A	G	G	G	G	G	G	G	G	G	G	G	G	A	G	G	G	G	G	G	A	G	G	G	A
AX-110048072	A/G	1A	393454752	+	NA	NA	NA	NA	NA	NA	A	A	A	A	G	G	A	A	A	A	G	G	A	G	G	A	A	A	A	A	A	A	A	A	A	A	A	G	A	A	A	A	A	A	G	A	A	A	G
AX-109842802	T/A	1A	393492937	+	NA	NA	NA	NA	NA	NA	T	T	T	T	A	A	T	T	T	T	A	A	T	A	A	T	T	T	T	T	T	T	T	T	T	T	T	A	T	T	T	T	T	T	A	T	T	T	A
AX-109948892	G/C	1A	393512028	+	NA	NA	NA	NA	NA	NA	G	G	G	G	C	C	G	G	G	G	C	C	G	C	C	G	G	G	G	G	G	G	G	G	G	G	G	C	G	G	G	N	G	G	C	G	N	G	C
AX-108934237	C/T	1A	394001674	+	NA	NA	NA	NA	NA	NA	C	C	C	C	T	T	C	C	C	C	T	T	C	T	T	C	C	C	C	C	C	C	C	C	C	C	C	T	C	C	C	C	C	C	T	C	C	C	T
AX-109345975	A/G	1A	394260203	+	NA	NA	NA	NA	NA	NA	A	A	A	A	G	G	A	A	A	A	G	G	A	G	G	A	A	A	A	A	A	A	A	A	A	A	A	G	A	A	A	A	N	A	G	A	A	A	G
AX-95662320	A/G	1A	394260203	+	NA	NA	NA	NA	NA	NA	A	A	A	A	G	G	A	A	A	A	G	G	A	G	G	A	A	A	A	A	A	A	A	A	A	A	A	G	A	A	A	A	A	A	G	A	A	A	G
AX-109972578	A/G	1A	394302994	+	NA	NA	NA	NA	NA	NA	A	A	A	A	G	G	A	A	A	A	G	G	A	G	G	A	A	A	A	A	A	A	A	A	A	A	A	G	A	A	A	A	A	A	G	A	A	A	G
AX-110394399	G/A	1A	394323169	+	NA	NA	NA	NA	NA	NA	G	G	G	G	A	A	G	G	G	G	A	A	G	A	A	G	G	G	G	G	G	G	G	G	G	G	G	A	G	G	G	G	G	G	A	G	G	G	A
AX-94417411	A/G	1A	394445115	+	NA	NA	NA	NA	NA	NA	A	A	A	A	G	G	A	A	A	A	G	G	A	G	G	A	A	A	A	A	A	A	A	A	A	A	A	G	A	A	A	A	A	A	G	A	A	A	G
AX-95176482	G/T	1A	394478402	+	NA	NA	NA	NA	NA	NA	G	G	G	G	T	T	G	G	G	G	T	T	G	T	T	G	G	G	G	G	G	G	G	G	G	G	G	T	G	G	G	G	G	G	T	G	G	G	T
AX-108995313	T/C	1A	394586291	+	NA	NA	NA	NA	NA	NA	T	T	T	T	C	C	T	T	T	T	C	C	T	C	C	T	T	T	T	T	T	T	T	T	T	T	T	C	T	T	T	T	T	T	C	T	T	T	C
AX-86164029	C/T	1A	394590043	+	NA	NA	NA	NA	NA	NA	C	C	C	C	C	C	C	C	C	C	C	C	C	C	T	C	C	C	C	C	C	C	C	C	C	C	N	C	N	C	C	C	Y	C	C	C	C	T	T
AX-94526905	G/A	1A	394853122	+	NA	NA	NA	NA	NA	NA	G	G	G	G	G	G	G	G	G	G	G	G	G	N	A	G	G	G	G	G	G	G	G	G	G	G	G	G	G	G	G	G	G	G	G	G	G	A	A
AX-110408382	G/C	1A	394855239	+	NA	NA	NA	NA	NA	NA	G	G	G	G	C	C	G	G	G	G	C	C	G	C	C	G	G	G	G	G	G	G	G	G	G	G	G	C	G	G	G	G	G	G	C	G	G	G	C
AX-94489119	A/G	1A	395206710	+	NA	NA	NA	NA	NA	NA	A	A	A	A	G	G	A	A	A	A	G	G	A	G	G	A	A	A	A	A	A	A	A	A	A	A	A	G	A	A	A	A	A	A	G	A	A	A	G
AX-94466632	A/C	1A	403028587	+	NA	NA	NA	NA	NA	NA	A	A	A	A	C	C	A	A	A	A	C	C	A	C	C	A	A	A	A	A	A	A	A	A	A	A	A	C	A	A	A	A	A	A	C	A	A	A	C
AX-110744088	G/T	1A	423399512	+	NA	NA	NA	NA	NA	NA	G	G	G	G	T	T	G	G	G	G	T	T	G	N	T	G	G	G	G	G	G	G	G	G	G	G	G	T	G	G	G	G	G	G	T	G	G	G	T
AX-95109512	A/C	1A	427484763	+	NA	NA	NA	NA	NA	NA	A	A	A	A	C	C	C	C	C	A	A	A	C	A	C	A	C	A	A	A	A	A	C	C	A	A	C	A	A	A	A	A	C	C	A	C	C	C	C
AX-110391018	C/T	1A	428980897	+	NA	NA	NA	NA	NA	NA	C	C	C	C	T	T	C	C	C	C	T	T	C	T	T	C	C	C	C	C	C	C	C	C	C	C	C	T	C	C	C	C	C	C	T	C	C	C	T
AX-94742397	C/T	1A	430600493	+	NA	NA	NA	NA	NA	NA	C	C	C	C	C	C	T	C	T	C	C	C	C	C	C	C	C	T	T	T	T	T	T	C	T	C	T	C	C	C	C	T	N	T	C	C	C	C	C
AX-111154099	A/G	1A	432634528	+	NA	NA	NA	NA	NA	NA	R	N	G	G	A	A	A	N	A	G	A	A	G	A	A	G	N	A	A	A	A	A	A	R	A	N	A	A	G	G	R	A	A	A	A	N	G	G	A
AX-179560753	A/G	1A	432634528	+	NA	NA	NA	NA	NA	NA	G	G	G	G	A	A	A	G	A	G	A	A	G	A	A	G	G	A	A	A	A	A	A	G	A	G	A	A	G	G	G	A	A	A	A	G	G	G	A
AX-111593714	C/T	1A	432634574	+	NA	NA	NA	NA	NA	NA	T	T	T	T	C	C	C	T	C	T	C	C	T	C	C	T	T	C	C	C	C	C	C	T	C	T	C	C	T	T	T	C	C	C	C	T	T	T	C
AX-86172429	T/C	1A	432635042	+	NA	NA	NA	NA	NA	NA	C	C	C	C	T	T	T	C	T	C	T	T	C	T	T	C	C	T	T	T	T	T	T	C	T	C	T	T	C	C	C	T	T	T	T	C	C	C	T
AX-86172430	T/C	1A	432635042	+	NA	NA	NA	NA	NA	NA	C	C	C	C	T	T	T	C	T	C	T	T	C	T	T	C	C	T	T	T	T	T	T	C	T	C	T	T	C	C	C	T	T	T	T	C	C	C	T
AX-179559786	A/G	1A	432975014	+	NA	NA	NA	NA	NA	NA	A	A	A	A	G	G	A	A	A	A	G	G	A	G	G	A	A	A	A	A	A	A	A	A	A	A	A	G	A	A	A	A	A	A	G	A	A	A	G
AX-95634445	A/G	1A	432975014	+	NA	NA	NA	NA	NA	NA	A	A	A	A	G	R	A	A	A	A	G	G	A	G	G	A	A	A	A	A	A	A	A	A	A	A	A	G	A	A	A	A	A	A	G	A	A	A	G
AX-94608897	C/G	1A	434423745	+	NA	NA	NA	NA	NA	NA	C	C	C	C	G	G	C	C	C	C	G	G	C	G	G	C	C	C	C	C	C	C	C	C	C	C	C	G	C	C	C	C	C	C	G	C	C	C	G
AX-95072845	A/G	1A	434425788	+	NA	NA	NA	NA	NA	NA	A	A	A	A	G	G	A	A	A	A	G	G	A	G	G	A	A	A	A	A	A	A	A	A	A	A	A	G	A	A	A	A	A	A	G	A	A	A	G
AX-94451045	C/T	1A	434639076	+	NA	NA	NA	NA	NA	NA	C	C	C	C	T	T	C	C	C	C	T	T	C	T	T	C	C	C	C	C	C	C	C	C	C	C	C	T	C	C	C	N	C	C	T	C	C	C	T
AX-95634131	G/A	1A	434873788	+	NA	NA	NA	NA	NA	NA	G	G	G	G	R	R	G	G	G	G	A	A	G	A	A	G	G	G	G	G	G	G	G	G	G	G	G	A	G	G	G	G	G	G	A	G	G	G	A
AX-112286193	G/A	1A	435061844	+	NA	NA	NA	NA	NA	NA	G	G	G	G	A	A	G	G	G	G	A	A	G	A	A	G	G	G	G	G	G	G	G	G	G	G	G	A	G	G	G	G	G	G	A	G	G	G	A
AX-95633461	G/A	1A	435061844	+	NA	NA	NA	NA	NA	NA	G	G	G	G	A	A	G	G	G	G	A	A	G	A	A	G	G	G	G	G	G	G	G	G	G	G	G	A	G	G	G	G	G	G	A	G	G	G	A
AX-109368048	G/T	1A	437580761	+	NA	NA	NA	NA	NA	NA	G	G	G	G	T	T	G	G	G	G	T	T	G	T	T	G	G	G	G	G	G	G	G	G	G	G	G	T	G	G	G	G	G	G	T	G	G	G	T
AX-108877137	T/C	1A	438306058	+	NA	NA	NA	NA	NA	NA	T	T	T	T	C	C	T	T	T	T	C	C	T	C	C	T	T	T	T	T	T	T	T	T	T	T	T	C	T	T	T	T	T	T	C	T	T	T	C
AX-179561765	G/A	1A	438366099	+	NA	NA	NA	NA	NA	NA	G	G	G	G	A	A	G	G	G	G	A	A	G	A	A	G	G	G	G	G	G	G	G	G	G	G	G	A	G	G	G	G	G	G	A	G	G	G	A
AX-95661477	G/A	1A	438366099	+	NA	NA	NA	NA	NA	NA	G	G	G	G	A	A	G	G	G	G	A	A	G	A	A	G	G	G	G	G	G	G	G	G	G	G	G	A	G	G	G	G	G	G	A	G	G	G	A
AX-94778455	T/C	1A	438685324	+	NA	NA	NA	NA	NA	NA	T	T	T	T	T	T	T	T	T	T	T	T	T	T	C	T	T	T	T	T	T	T	T	T	T	T	T	T	T	T	T	C	T	T	T	T	T	C	T
AX-111020377	G/A	1A	439336294	+	NA	NA	NA	NA	NA	NA	G	G	G	G	A	A	G	G	G	G	A	A	G	A	A	G	G	G	G	G	G	G	G	G	G	G	G	A	G	G	G	G	G	G	A	G	G	G	A
AX-111086674	C/T	1A	439369312	+	NA	NA	NA	NA	NA	NA	C	C	C	C	T	T	C	C	C	C	T	T	C	T	T	C	C	C	C	C	C	C	C	C	C	C	C	T	C	C	C	C	C	C	T	C	C	C	T
AX-108968041	G/A	1A	439416046	+	NA	NA	NA	NA	NA	NA	G	G	G	G	A	A	G	G	G	G	A	A	G	A	A	G	G	G	G	G	G	G	G	G	G	G	G	A	G	G	G	G	G	G	A	G	G	G	A
AX-86173886	G/A	1A	441235985	+	NA	NA	NA	NA	NA	NA	G	G	G	G	A	A	G	G	G	G	A	A	G	A	A	G	G	G	G	G	G	G	G	G	G	G	G	A	G	G	G	G	G	G	A	G	G	G	A
AX-86173887	G/A	1A	441235985	+	NA	NA	NA	NA	NA	NA	G	G	G	G	A	A	G	G	G	G	A	A	G	A	A	G	G	G	G	G	G	G	G	G	G	G	G	A	G	G	G	G	G	G	A	G	G	G	A
AX-95631820	G/A	1A	449937087	+	NA	NA	NA	NA	NA	NA	G	G	G	G	G	G	G	G	G	G	G	G	G	G	G	G	G	G	G	G	G	G	A	G	G	G	G	G	G	G	G	A	A	G	G	G	G	G	G
AX-95679169	G/A	1A	458397080	+	NA	NA	NA	NA	NA	NA	G	G	G	G	G	G	G	G	G	G	A	A	G	A	A	G	G	G	G	G	G	G	G	G	G	G	G	A	G	G	G	G	G	G	A	G	G	G	G
AX-94550611	G/A	1A	460993037	+	NA	NA	NA	NA	NA	NA	G	G	G	G	G	G	G	G	G	G	G	G	G	G	G	G	G	G	G	G	G	G	G	G	G	G	G	G	G	G	G	G	A	G	G	G	G	G	A
AX-109083638	G/A	1A	462403597	+	NA	NA	NA	NA	NA	NA	G	G	G	G	G	G	G	G	G	G	A	A	G	A	A	G	G	G	G	G	G	G	G	G	G	G	G	A	G	G	G	G	G	G	A	G	G	G	G
AX-86173442	T/C	1A	462434946	+	NA	NA	NA	NA	NA	NA	T	T	T	C	C	C	N	T	T	T	T	T	T	T	T	T	T	C	C	C	C	C	T	T	C	T	T	T	T	T	T	T	T	T	T	T	T	T	C
AX-86173443	T/C	1A	462434946	+	NA	NA	NA	NA	NA	NA	T	T	T	C	C	C	N	T	T	T	T	T	T	T	T	T	T	C	C	C	C	C	T	T	C	T	T	T	T	T	N	T	T	T	T	T	T	T	C
AX-110963850	A/C	1A	462711308	+	NA	NA	NA	NA	NA	NA	A	A	A	C	C	C	A	A	A	A	A	A	A	A	A	A	A	C	C	C	C	C	A	A	C	A	A	A	A	A	A	A	A	A	A	A	A	A	C
AX-110976368	G/C	1A	462777812	+	NA	NA	NA	NA	NA	NA	G	G	G	G	G	G	G	G	G	G	C	C	G	C	C	G	G	G	G	G	G	G	G	G	G	G	G	C	G	G	G	G	G	G	C	G	G	G	G
AX-94702400	G/A	1A	462799431	+	NA	NA	NA	NA	NA	NA	G	G	G	G	A	A	G	G	G	G	G	G	G	G	G	G	G	G	G	G	G	G	A	G	G	G	G	G	G	G	G	G	N	G	G	G	G	G	A
AX-94542559	A/G	1A	463041172	+	NA	NA	NA	NA	NA	NA	A	A	A	A	A	A	A	A	A	A	G	G	A	G	G	A	A	A	A	A	A	A	A	A	A	A	A	G	A	A	A	A	A	A	G	A	A	A	A
AX-86173157	A/G	1A	464250075	+	NA	NA	NA	NA	NA	NA	A	A	A	A	G	G	A	A	A	A	A	A	A	A	A	A	A	N	A	A	A	A	A	A	A	A	A	A	A	A	A	A	A	A	A	A	A	A	G
AX-94600055	C/T	1A	464793640	+	NA	NA	NA	NA	NA	NA	C	C	C	C	T	T	C	C	C	C	C	C	C	C	C	C	C	C	C	C	C	C	C	C	C	C	C	C	C	C	C	C	C	C	C	C	C	C	T
AX-86172575	T/C	1A	472169030	+	NA	NA	NA	NA	NA	NA	T	T	T	T	T	T	T	T	T	T	T	T	T	T	T	T	T	C	C	C	C	C	T	T	C	T	T	T	T	T	T	T	T	T	T	T	T	T	T
AX-86172576	T/C	1A	472169030	+	NA	NA	NA	NA	NA	NA	T	T	T	T	T	T	T	T	T	T	T	T	T	T	T	T	T	C	C	C	C	C	T	T	C	T	T	T	T	T	T	T	T	T	T	T	T	T	T
AX-109844206	A/G	1A	473013944	+	NA	NA	NA	NA	NA	NA	A	A	A	A	A	A	A	A	A	A	A	A	A	A	A	A	A	G	G	G	G	G	A	A	G	A	A	A	A	A	A	A	A	A	A	A	A	A	A
AX-112286066	A/G	1A	473637156	+	NA	NA	NA	NA	NA	NA	A	A	A	A	A	A	A	A	A	A	A	A	A	A	A	A	A	G	G	G	G	G	A	A	G	A	A	A	A	A	A	A	A	A	A	A	A	A	A
AX-95661931	A/G	1A	473637156	+	NA	NA	NA	NA	NA	NA	A	A	A	A	A	A	A	A	A	A	A	A	A	A	A	A	A	G	G	G	G	G	A	A	G	A	A	A	A	A	A	A	A	A	A	A	A	A	A
AX-111082947	A/G	1A	473724033	+	NA	NA	NA	NA	NA	NA	A	A	A	A	A	A	A	A	A	A	A	A	A	A	A	A	A	G	G	G	G	G	A	A	G	A	A	A	A	A	A	A	A	A	A	A	A	A	A
AX-89672347	A/G	1A	474197569	+	NA	NA	NA	NA	NA	NA	A	A	A	A	G	G	A	A	A	A	A	A	A	A	A	A	A	G	G	G	G	G	A	A	G	A	A	A	A	A	A	A	A	A	A	A	A	A	G
AX-110069135	G/A	1A	474642192	+	NA	NA	NA	NA	NA	NA	G	G	G	G	G	G	G	G	G	G	G	G	G	G	G	G	G	A	A	A	A	A	G	G	A	G	G	G	G	G	G	G	G	G	G	G	G	G	G
AX-95653859	G/A	1A	474642192	+	NA	NA	NA	NA	NA	NA	G	G	G	G	G	G	G	G	G	G	G	G	G	G	G	G	G	A	A	A	A	A	G	G	A	G	G	G	G	G	G	G	G	G	G	G	G	G	G
AX-94768074	C/G	1A	474699853	+	NA	NA	NA	NA	NA	NA	C	C	C	C	C	C	C	C	C	C	C	C	C	N	C	C	C	G	G	G	G	G	C	C	G	C	C	C	C	C	C	C	C	C	C	C	C	C	C
AX-111543794	T/C	1A	477019228	+	NA	NA	NA	NA	NA	NA	T	T	T	T	C	C	T	T	T	T	C	C	T	C	C	T	T	C	C	C	C	C	T	T	C	T	T	C	T	T	T	T	T	T	C	T	T	T	C
AX-86163134	C/A	1A	477046669	+	NA	NA	NA	NA	NA	NA	C	C	C	C	A	A	C	C	C	C	A	A	C	A	A	C	C	A	A	A	A	A	C	C	A	C	C	A	C	C	C	C	C	C	A	C	C	C	A
AX-86175827	T/G	1A	477654858	+	NA	NA	NA	NA	NA	NA	T	T	T	T	G	G	T	T	T	T	G	G	T	G	G	T	T	G	G	G	G	G	T	T	G	T	T	G	T	T	T	T	T	T	G	T	T	T	G
AX-86175828	T/G	1A	477654858	+	NA	NA	NA	NA	NA	NA	T	T	T	T	G	G	T	T	T	T	G	G	T	G	G	T	T	G	G	G	G	G	T	T	G	T	T	G	T	T	T	T	T	T	G	T	T	T	G
AX-110490481	A/G	1A	477728336	+	NA	NA	NA	NA	NA	NA	A	A	A	A	G	G	A	A	A	A	G	G	A	G	G	A	A	G	G	G	G	G	A	A	G	A	A	G	A	A	A	A	A	A	G	A	A	A	G
AX-109932328	C/T	1A	477729990	+	NA	NA	NA	NA	NA	NA	C	C	C	C	T	T	C	C	C	C	C	C	C	C	C	C	C	T	T	T	T	T	C	N	T	C	C	C	C	C	C	C	C	C	C	C	C	C	T
AX-109842766	C/T	1A	477737419	+	NA	NA	NA	NA	NA	NA	C	C	C	C	T	T	C	C	C	C	C	C	C	C	C	C	C	T	T	T	T	T	C	C	T	C	C	C	C	C	C	C	C	C	C	C	C	C	T
AX-108870453	T/C	1A	478351306	+	NA	NA	NA	NA	NA	NA	T	T	T	T	T	T	T	T	T	T	T	T	T	T	T	T	T	C	C	C	C	C	T	T	C	T	T	T	T	T	T	T	T	T	T	T	T	T	T
AX-94947812	G/A	1A	480549753	+	NA	NA	NA	NA	NA	NA	G	G	G	G	G	G	G	G	G	G	G	G	G	G	G	G	G	G	N	G	G	G	G	G	G	G	G	G	G	G	G	G	G	G	G	G	G	G	G
AX-111493911	G/A	1A	480567254	+	NA	NA	NA	NA	NA	NA	G	G	G	G	A	A	G	G	G	G	G	G	G	G	G	G	G	G	G	G	G	G	G	G	G	G	G	G	G	G	G	G	R	G	G	G	G	G	A
AX-94889305	C/A	1A	480755283	+	NA	NA	NA	NA	NA	NA	C	C	C	C	A	A	C	C	C	C	C	C	C	C	C	C	C	C	C	C	C	C	C	C	C	C	C	C	C	C	C	C	C	C	C	C	C	C	A
AX-95684973	C/A	1A	480755283	+	NA	NA	NA	NA	NA	NA	C	C	C	C	A	A	C	C	C	C	C	C	C	C	C	C	C	C	C	C	C	C	C	C	C	C	C	C	C	C	C	C	C	C	C	C	C	C	A
AX-179557743	T/C	1A	480755631	+	NA	NA	NA	NA	NA	NA	T	T	T	T	C	C	T	T	T	T	T	T	T	T	T	T	T	T	T	T	T	T	T	T	T	T	T	T	T	T	T	T	T	T	T	T	T	T	C
AX-95188865	T/C	1A	480755631	+	NA	NA	NA	NA	NA	NA	T	T	T	T	C	C	T	T	T	T	T	T	T	T	T	T	T	T	T	T	T	T	T	T	T	T	T	T	T	T	T	T	N	T	T	T	T	T	C
AX-112290238	A/C	1A	480755651	+	NA	NA	NA	NA	NA	NA	A	A	A	A	A	A	A	A	A	A	A	A	A	A	A	A	A	A	A	A	A	A	A	A	A	A	A	A	A	A	A	A	A	A	A	A	A	A	A
AX-95630287	A/C	1A	480755651	+	NA	NA	NA	NA	NA	NA	A	A	A	A	A	A	A	A	A	A	A	A	A	A	A	A	A	A	A	A	A	A	A	A	A	A	A	A	A	A	A	A	A	A	A	A	A	A	A
AX-109538739	G/A	1A	480830276	+	NA	NA	NA	NA	NA	NA	G	G	G	G	A	A	G	G	G	G	G	G	G	G	G	G	G	G	G	G	G	G	G	G	G	G	G	G	G	G	G	G	G	G	G	G	G	G	A
AX-86180120	A/G	1A	480831000	+	NA	NA	NA	NA	NA	NA	A	A	A	A	A	A	A	A	A	A	A	A	A	A	A	A	A	A	A	A	A	A	A	A	A	A	A	A	A	A	A	A	A	A	A	A	A	A	A
AX-109823133	C/A	1A	481633939	+	NA	NA	NA	NA	NA	NA	C	C	C	C	A	A	C	C	C	C	C	C	C	C	C	C	C	C	C	C	C	C	C	C	C	C	C	C	C	C	C	C	C	C	C	C	C	C	A
AX-95682410	G/A	1A	481651371	+	NA	NA	NA	NA	NA	NA	G	G	G	G	A	A	G	G	G	G	G	G	G	G	G	G	G	A	A	A	A	A	G	G	A	G	G	G	G	G	G	G	G	G	G	G	G	G	A
AX-95069018	G/A	1A	481652227	+	NA	NA	NA	NA	NA	NA	G	G	G	G	A	A	G	G	G	G	G	G	G	G	G	G	G	A	A	A	A	A	G	G	A	G	G	G	G	G	G	G	G	G	G	G	G	G	A
AX-110506311	A/G	1A	481652509	+	NA	NA	NA	NA	NA	NA	A	A	A	A	A	A	A	A	A	A	A	A	A	A	A	A	A	A	A	A	A	A	A	A	A	A	A	A	A	A	A	A	A	A	A	A	A	A	A
AX-94413158	A/G	1A	481652509	+	NA	NA	NA	NA	NA	NA	A	A	A	A	A	A	A	A	A	A	A	A	A	A	A	A	A	A	A	A	A	A	A	A	A	A	A	A	A	A	A	A	A	A	A	A	A	A	A
AX-94943789	A/G	1A	481655155	+	NA	NA	NA	NA	NA	NA	A	A	A	A	G	G	A	A	A	A	A	A	A	A	A	N	A	A	A	A	N	A	A	A	A	A	A	A	A	A	A	A	A	A	A	A	A	N	G
AX-95685367	A/G	1A	481655155	+	NA	NA	NA	NA	NA	NA	A	A	A	A	G	G	A	A	A	A	A	A	A	A	N	A	A	A	A	A	A	A	A	A	A	A	A	A	A	A	A	A	A	A	A	A	A	A	G
AX-110546208	T/C	1A	481671124	+	NA	NA	NA	NA	NA	NA	T	T	T	T	C	C	T	T	T	T	T	T	T	T	T	T	T	C	C	C	C	C	T	T	C	T	T	T	T	T	T	T	T	T	T	T	T	T	C
AX-95242713	C/T	1A	481691783	+	NA	NA	NA	NA	NA	NA	C	C	C	C	C	C	C	C	C	C	C	C	C	C	C	C	C	C	C	C	C	C	C	C	C	C	C	C	C	C	C	C	C	C	C	C	C	C	C
AX-112287874	A/G	1A	481692078	+	NA	NA	NA	NA	NA	NA	A	A	A	A	G	G	A	A	A	A	A	A	A	A	A	A	A	A	A	A	A	A	A	A	A	A	A	A	A	A	A	A	A	A	A	A	A	A	G
AX-94432167	A/G	1A	481692078	+	NA	NA	NA	NA	NA	NA	A	A	A	A	N	R	A	A	A	A	A	A	A	A	A	A	A	A	A	A	A	A	A	A	A	N	A	A	A	A	A	A	A	N	A	A	A	A	R
AX-89553661	A/G	1A	481755014	+	NA	NA	NA	NA	NA	NA	A	A	A	A	G	G	A	A	A	A	A	A	A	A	A	A	A	A	A	A	A	A	A	A	A	A	A	A	A	A	A	A	A	A	A	A	A	A	G
AX-108893431	G/A	1A	482249344	+	NA	NA	NA	NA	NA	NA	G	G	G	G	A	A	G	G	G	G	G	G	G	G	G	G	G	A	A	A	A	A	G	G	A	G	G	G	G	G	G	G	G	G	G	G	G	G	A
AX-94392849	T/G	1A	482278982	+	NA	NA	NA	NA	NA	NA	T	T	T	T	G	G	T	T	T	T	T	T	T	T	T	T	T	G	G	G	G	G	T	T	G	T	T	T	T	T	T	T	T	T	T	T	T	T	G
AX-95631047	T/G	1A	482278982	+	NA	NA	NA	NA	NA	NA	T	T	T	T	G	G	T	T	T	T	T	T	T	T	T	T	T	G	G	G	G	G	T	T	G	T	T	T	T	T	T	T	T	T	T	T	T	T	G
AX-94507420	G/A	1A	482335848	+	NA	NA	NA	NA	NA	NA	G	G	G	G	A	A	G	G	G	G	G	G	G	G	G	G	G	A	A	A	A	A	G	G	A	G	G	G	G	G	G	G	G	G	G	G	G	G	A
AX-94834373	C/T	1A	482761756	+	NA	NA	NA	NA	NA	NA	C	C	C	C	T	T	C	C	C	C	C	C	C	C	C	C	C	N	T	T	T	T	C	Y	N	C	C	C	N	C	N	C	C	C	C	C	C	N	T
AX-95630619	C/T	1A	482761756	+	NA	NA	NA	NA	NA	NA	C	C	C	C	T	T	C	C	C	C	C	C	C	C	C	C	C	T	T	T	T	T	C	C	T	C	C	C	C	C	C	C	C	C	C	C	C	C	T
AX-94826844	T/C	1A	482761802	+	NA	NA	NA	NA	NA	NA	T	T	T	T	C	C	T	T	T	T	T	T	T	T	T	T	T	C	C	C	C	C	T	T	C	T	T	T	T	T	T	T	N	T	T	T	T	T	C
AX-95684680	T/C	1A	482761802	+	NA	NA	NA	NA	NA	NA	T	T	T	T	C	C	T	T	T	T	T	T	T	T	T	T	T	C	C	C	C	C	T	T	C	T	T	T	T	T	T	T	T	T	T	T	T	T	C
AX-179560459	G/A	1A	482769470	+	NA	NA	NA	NA	NA	NA	G	G	G	G	A	A	G	G	G	G	G	G	G	G	G	G	G	G	G	G	G	G	A	G	G	G	G	G	G	G	G	G	A	G	G	G	G	G	A
AX-179476256	T/C	1A	482771048	+	NA	NA	NA	NA	NA	NA	T	T	T	T	T	T	T	T	T	T	T	T	T	N	T	T	T	T	T	T	T	T	T	T	T	T	T	T	T	T	T	T	T	T	T	T	T	T	T
AX-94770579	T/C	1A	482771048	+	NA	NA	NA	NA	NA	NA	T	T	T	T	T	T	T	T	T	T	T	T	T	T	T	T	T	T	T	T	T	T	T	T	T	T	T	T	T	T	T	T	T	T	T	T	T	T	T
AX-112289517	G/A	1A	482780949	+	NA	NA	NA	NA	NA	NA	G	G	G	G	A	A	G	G	G	G	G	G	G	G	G	G	G	A	A	A	A	A	G	G	A	G	G	G	G	G	G	G	G	G	G	G	G	G	G
AX-111634870	G/A	1A	482780984	+	NA	NA	NA	NA	NA	NA	G	G	G	G	A	A	N	G	G	G	G	G	G	G	G	G	G	A	A	A	A	A	G	G	A	G	G	G	G	G	G	G	G	G	G	G	G	G	R
AX-108949130	C/G	1A	482784061	+	NA	NA	NA	NA	NA	NA	C	C	C	C	C	C	C	C	C	C	C	C	C	C	C	C	C	C	C	C	C	C	C	C	C	C	C	C	C	C	C	C	C	C	C	C	C	C	C
AX-179560511	T/G	1A	482966563	+	NA	NA	NA	NA	NA	NA	T	T	T	T	G	G	T	T	T	T	T	T	T	T	T	T	T	G	G	G	G	G	T	T	G	T	T	T	T	T	T	T	T	T	T	T	T	T	G
AX-94519923	T/G	1A	482966563	+	NA	NA	NA	NA	NA	NA	T	T	T	T	G	G	T	T	T	T	T	T	T	T	T	T	T	G	G	G	G	G	T	T	G	T	T	T	T	T	T	T	T	T	T	T	T	T	G
AX-95659327	G/A	1A	483033323	+	NA	NA	NA	NA	NA	NA	G	G	G	G	A	A	G	G	G	G	G	G	G	G	G	G	G	A	A	A	A	A	G	G	A	G	G	G	G	G	G	G	G	G	G	G	G	G	A
AX-109932303	C/T	1A	483194714	+	NA	NA	NA	NA	NA	NA	C	C	C	C	T	T	C	C	C	C	C	C	C	C	C	C	C	T	T	T	T	T	C	C	T	C	C	C	C	C	C	C	C	C	C	C	C	C	T
AX-94507352	T/A	1A	483677023	+	NA	NA	NA	NA	NA	NA	T	T	T	T	T	T	T	T	T	T	T	T	T	T	T	T	T	T	T	T	T	T	T	T	T	T	T	T	T	T	T	T	T	T	T	T	T	T	T
AX-109364053	A/G	1A	484335332	+	NA	NA	NA	NA	NA	NA	A	A	A	A	G	N	A	A	A	A	A	A	A	A	A	A	A	G	N	G	G	R	A	A	G	A	A	A	A	A	A	A	A	A	A	A	A	A	G
AX-179560049	A/G	1A	484335332	+	NA	NA	NA	NA	NA	NA	A	A	A	A	G	G	A	A	A	A	A	A	A	A	A	A	A	G	G	G	G	G	A	A	G	A	A	A	A	A	A	A	A	A	A	A	A	A	G
AX-95652044	T/C	1A	484335555	+	NA	NA	NA	NA	NA	NA	T	T	T	T	T	T	T	T	T	T	C	C	T	C	C	T	T	T	T	T	T	T	T	T	T	T	T	C	T	T	T	T	T	T	C	T	T	T	T
AX-109993903	C/T	1A	484980233	+	NA	NA	NA	NA	NA	NA	C	C	C	C	C	C	C	C	C	C	T	T	C	T	T	C	C	C	C	C	C	C	C	C	C	C	C	T	C	C	C	C	C	C	T	C	C	C	C
AX-86173311	A/G	1A	485003275	+	NA	NA	NA	NA	NA	NA	A	A	A	A	G	G	A	A	A	A	A	A	A	A	A	A	A	G	G	G	G	G	A	A	R	A	A	A	A	A	A	A	A	A	A	A	A	A	G
AX-110057220	T/C	1A	485003691	+	NA	NA	NA	NA	NA	NA	T	T	T	T	C	C	T	T	T	T	T	T	T	T	T	T	T	C	C	C	C	C	T	T	C	T	T	T	T	T	T	T	T	T	T	T	T	T	C
AX-108917420	G/A	1A	485173993	+	NA	NA	NA	NA	NA	NA	G	G	G	G	G	G	G	G	G	G	G	G	G	G	G	G	G	G	G	G	G	G	G	G	G	G	G	G	G	G	G	G	G	G	G	G	G	G	G
AX-179475549	T/G	1A	485228932	+	NA	NA	NA	NA	NA	NA	T	T	T	T	G	G	T	T	T	T	T	T	T	T	T	T	T	G	G	G	G	G	T	T	G	T	T	T	T	T	T	T	N	T	T	T	T	T	G
AX-109961395	T/C	1A	485336837	+	NA	NA	NA	NA	NA	NA	T	T	T	T	T	T	T	T	T	T	T	T	T	T	T	T	T	T	T	T	T	T	T	T	T	T	T	T	T	T	T	T	T	T	T	T	T	T	T
AX-86174988	G/A	1A	485343051	+	NA	NA	NA	NA	NA	NA	G	G	G	G	G	G	G	G	G	G	G	G	G	G	G	G	G	G	G	G	G	G	G	G	G	G	G	G	G	G	G	G	G	G	G	G	G	G	G
AX-86174989	G/A	1A	485343051	+	NA	NA	NA	NA	NA	NA	G	G	G	G	G	G	G	G	G	G	G	G	G	G	G	G	G	G	G	G	G	G	G	G	G	G	G	G	G	G	G	G	G	G	G	G	G	G	G
AX-95684470	C/A	1A	485343139	+	NA	NA	NA	NA	NA	NA	C	C	C	C	A	A	C	C	C	C	C	C	C	C	C	C	C	A	A	A	A	A	C	C	A	C	C	C	C	C	C	C	C	C	C	C	C	C	A
AX-94876574	T/C	1A	485343698	+	NA	NA	NA	NA	NA	NA	T	T	T	T	T	T	T	T	T	T	T	T	T	T	T	T	T	T	T	T	T	T	T	T	T	T	T	T	T	T	T	T	T	T	T	T	T	T	T
AX-95679573	T/C	1A	485343698	+	NA	NA	NA	NA	NA	NA	T	T	T	T	T	T	T	T	T	T	T	T	T	T	T	T	T	T	T	T	T	T	T	T	T	T	T	T	T	T	T	T	T	T	T	T	T	T	T
AX-108831315	C/T	1A	485350108	+	NA	NA	NA	NA	NA	NA	C	C	C	C	C	C	C	C	C	C	C	C	C	C	C	C	C	C	C	C	C	C	C	C	C	C	C	C	C	C	C	C	C	C	C	C	C	C	C
AX-109485282	A/G	1A	485350728	+	NA	NA	NA	NA	NA	NA	A	A	A	A	A	A	A	A	A	A	G	G	A	G	G	A	A	A	A	A	A	A	A	A	A	A	A	G	A	A	A	A	A	A	G	A	A	A	A
AX-109519398	G/A	1A	485358747	+	NA	NA	NA	NA	NA	NA	G	G	G	G	A	A	G	G	G	G	G	G	G	G	G	G	G	A	A	A	A	A	G	G	A	G	G	G	G	G	G	G	G	G	G	G	G	G	A
AX-111091197	T/G	1A	485536644	+	NA	NA	NA	NA	NA	NA	T	T	T	T	T	T	T	T	T	T	T	T	T	T	T	T	T	T	T	T	T	T	T	T	T	T	T	T	T	T	T	T	T	T	T	T	T	T	T
AX-111031072	G/T	1A	486035384	+	NA	NA	NA	NA	NA	NA	G	G	G	G	G	G	G	G	G	G	G	G	G	G	G	G	G	G	G	G	G	G	G	G	G	G	G	G	G	G	G	G	G	G	G	G	G	G	G
AX-178059203	T/C	1A	486052322	+	NA	NA	NA	NA	NA	NA	T	T	T	T	C	C	T	T	T	T	T	T	T	T	T	T	T	C	C	C	C	C	T	T	C	T	T	T	T	T	T	T	T	T	T	T	T	T	C
AX-95681553	T/C	1A	486052322	+	NA	NA	NA	NA	NA	NA	T	T	T	T	C	C	T	T	T	T	T	T	T	T	T	T	T	C	C	C	C	C	T	T	C	T	T	T	T	T	T	T	T	T	T	T	T	T	C
AX-110070785	G/A	1A	486052839	+	NA	NA	NA	NA	NA	NA	G	G	G	G	A	A	G	G	G	G	G	G	G	G	G	G	G	A	A	A	A	A	G	G	A	G	G	G	G	G	G	G	G	G	G	G	G	G	A
AX-111696178	C/T	1A	486586508	+	NA	NA	NA	NA	NA	NA	C	C	C	C	C	C	C	C	C	C	T	T	C	T	T	C	C	C	C	C	C	C	C	C	C	C	C	T	C	C	C	C	C	C	T	C	C	C	C
AX-111104121	C/T	1A	486704097	+	NA	NA	NA	NA	NA	NA	Y	C	Y	C	T	T	Y	C	C	C	C	C	C	C	C	C	C	T	T	T	T	T	C	C	T	C	C	C	C	C	C	C	C	C	C	C	C	C	T
AX-110545671	G/A	1A	486705911	+	NA	NA	NA	NA	NA	NA	G	G	G	G	G	G	G	G	G	G	A	A	G	A	A	G	G	G	G	G	G	G	G	G	G	G	G	A	G	G	G	G	G	G	A	G	G	G	G
AX-109815371	T/A	1A	486799462	+	NA	NA	NA	NA	NA	NA	T	T	T	T	T	T	T	T	T	T	T	T	T	T	T	T	T	T	T	T	T	T	T	T	T	T	T	T	T	T	T	T	T	T	T	T	T	T	T
AX-110507721	A/G	1A	486943303	+	NA	NA	NA	NA	NA	NA	A	A	A	A	G	G	A	A	A	A	A	A	A	A	A	A	A	G	G	G	G	G	A	A	G	A	A	A	A	A	A	A	A	A	A	A	A	A	G
AX-110513818	G/C	1A	486954032	+	NA	NA	NA	NA	NA	NA	G	G	G	G	G	G	G	G	G	G	C	C	G	C	C	G	G	G	G	G	G	G	G	G	G	G	G	C	G	G	G	G	G	G	C	G	G	G	G
AX-108978389	A/G	1A	486956943	+	NA	NA	NA	NA	NA	NA	A	A	A	A	A	A	A	A	A	A	G	G	A	G	G	A	A	A	A	A	A	A	A	A	A	A	A	G	A	A	A	A	A	A	G	A	A	A	A
AX-111484910	C/A	1A	486974240	+	NA	NA	NA	NA	NA	NA	C	C	C	C	A	A	C	C	C	C	C	C	C	C	C	C	C	A	A	A	A	A	C	C	A	C	C	C	C	C	C	C	C	C	C	C	C	C	A
AX-94757176	C/T	1A	487011994	+	NA	NA	NA	NA	NA	NA	C	C	C	C	T	T	C	C	C	C	C	C	C	C	C	C	C	T	T	T	T	T	C	C	T	C	C	C	C	C	N	C	C	C	C	C	C	C	T
AX-179559417	G/A	1A	487017792	+	NA	NA	NA	NA	NA	NA	G	G	G	G	G	G	G	G	G	G	A	A	G	A	A	G	G	G	G	G	G	G	G	G	G	G	G	A	G	G	G	G	G	G	A	G	G	G	G
AX-95658921	G/A	1A	487017792	+	NA	NA	NA	NA	NA	NA	G	G	G	G	G	G	G	G	G	G	A	A	G	A	A	G	G	G	G	G	G	G	G	G	G	G	G	A	G	G	G	G	G	G	A	G	G	G	G
AX-109944937	G/A	1A	487039038	+	NA	NA	NA	NA	NA	NA	G	G	G	G	A	A	G	G	G	G	G	G	G	G	G	G	G	A	A	A	A	A	G	G	A	G	G	G	G	G	G	G	G	G	G	G	G	G	A
AX-95629446	G/A	1A	487093135	+	NA	NA	NA	NA	NA	NA	G	G	G	G	G	G	G	G	G	G	A	A	G	A	A	G	G	G	G	G	G	G	G	G	G	G	G	A	G	G	G	G	G	G	A	G	G	G	G
AX-111537555	A/G	1A	487305479	+	NA	NA	NA	NA	NA	NA	A	A	A	A	A	A	A	A	A	A	G	G	A	G	G	A	A	A	A	A	A	A	A	A	A	A	A	G	A	A	A	A	A	A	G	A	A	A	A
AX-111127994	C/T	1A	487497124	+	NA	NA	NA	NA	NA	NA	C	C	C	C	C	C	C	C	C	C	C	C	C	C	C	C	C	C	C	C	C	C	C	C	C	C	C	C	C	C	C	C	C	C	C	C	C	C	C
AX-109831764	C/G	1A	487725293	+	NA	NA	NA	NA	NA	NA	C	C	C	C	C	C	C	C	C	C	C	C	C	C	C	C	C	C	C	C	C	C	C	C	C	C	C	C	C	C	C	C	C	C	C	C	C	C	C
AX-86171813	C/T	1A	487731184	+	NA	NA	NA	NA	NA	NA	C	C	C	C	T	T	C	C	C	C	C	C	C	C	C	C	C	T	T	T	T	T	C	C	T	C	C	C	C	C	C	C	C	C	C	C	C	C	T
AX-86171814	C/T	1A	487731184	+	NA	NA	NA	NA	NA	NA	C	C	C	C	T	T	C	C	C	C	C	C	C	C	C	C	C	T	T	T	T	T	C	C	T	C	C	C	C	C	C	C	C	C	C	C	C	C	T
AX-94839686	T/C	1A	487732346	+	NA	NA	NA	NA	NA	NA	T	T	T	T	T	T	T	T	T	T	Y	Y	T	Y	Y	T	T	T	T	T	T	T	T	T	T	T	T	Y	T	T	T	T	T	T	Y	T	T	T	T
AX-110088114	C/T	1A	487739768	+	NA	NA	NA	NA	NA	NA	C	C	C	C	T	T	C	C	C	C	C	C	C	C	C	C	C	T	T	T	T	T	C	C	T	C	C	C	C	C	C	C	C	C	C	C	C	C	T
AX-110949025	G/T	1A	488068277	+	NA	NA	NA	NA	NA	NA	G	G	G	G	G	G	G	G	G	G	G	G	G	G	G	G	G	G	G	G	G	G	G	G	G	G	G	G	G	G	G	G	G	G	G	G	G	G	G
AX-110478814	C/T	1A	488070209	+	NA	NA	NA	NA	NA	NA	C	C	C	C	C	C	C	C	C	C	C	C	C	C	C	C	C	C	C	C	C	C	C	C	C	C	C	C	C	C	C	C	C	C	C	C	C	C	C
AX-109502948	C/T	1A	488097028	+	NA	NA	NA	NA	NA	NA	C	C	C	C	T	T	C	C	C	C	C	C	C	C	C	C	C	T	T	T	T	T	C	C	T	C	C	C	C	C	C	C	C	C	C	C	C	C	T
AX-108847117	A/G	1A	488102190	+	NA	NA	NA	NA	NA	NA	A	A	A	A	G	G	A	A	A	A	A	A	A	A	A	A	A	G	G	G	G	G	A	A	G	A	A	A	A	A	A	A	N	A	A	A	A	A	G
AX-89472485	A/G	1A	488107822	+	NA	NA	NA	NA	NA	NA	A	A	A	A	G	G	A	A	A	A	A	A	A	A	A	A	A	G	G	G	G	G	A	A	G	A	A	A	A	A	A	A	A	A	A	A	A	A	G
AX-110364737	A/G	1A	488189300	+	NA	NA	NA	NA	NA	NA	A	A	A	A	A	A	A	A	A	A	G	G	A	G	G	A	A	A	A	A	A	A	A	A	A	A	A	G	A	A	A	A	A	A	G	A	A	A	A
AX-94779840	G/A	1A	488625107	+	NA	NA	NA	NA	NA	NA	G	G	G	G	G	G	G	G	G	G	A	A	G	A	A	G	G	G	A	A	A	A	G	G	A	G	G	A	G	G	G	G	G	G	A	G	G	G	G
AX-94829509	G/A	1A	489274819	+	NA	NA	NA	NA	NA	NA	G	G	G	G	R	R	G	G	G	G	G	G	G	G	A	G	G	G	G	G	G	G	A	G	G	G	G	G	G	G	G	A	A	G	G	G	G	A	N
AX-109841429	G/A	1A	489280879	+	NA	NA	NA	NA	NA	NA	G	G	G	G	A	A	G	G	G	G	A	A	G	A	A	G	G	A	A	A	A	A	G	G	A	G	G	A	G	G	G	G	G	G	A	G	G	G	A
AX-108895514	C/T	1A	489285363	+	NA	NA	NA	NA	NA	NA	C	C	C	C	T	T	C	C	C	C	T	T	C	T	T	C	C	T	T	T	T	T	C	C	T	C	C	T	C	C	C	C	C	C	T	C	C	C	T
AX-109947456	C/T	1A	489406248	+	NA	NA	NA	NA	NA	NA	C	C	C	C	T	T	C	C	C	C	T	T	C	T	T	C	C	T	T	T	T	T	C	C	T	C	C	T	C	C	C	C	C	C	T	C	C	C	T
AX-109374386	A/G	1A	489409883	+	NA	NA	NA	NA	NA	NA	A	A	A	A	G	G	A	A	A	A	G	G	A	G	G	A	A	G	G	G	G	G	A	A	G	A	A	G	A	A	A	A	A	A	G	A	A	A	G
AX-109910238	C/T	1A	489410181	+	NA	NA	NA	NA	NA	NA	C	C	C	C	T	T	C	C	C	C	T	T	C	T	T	C	C	T	T	T	T	T	C	C	T	C	C	T	C	C	C	C	C	C	T	C	C	C	T
AX-111150867	G/T	1A	489502094	+	NA	NA	NA	NA	NA	NA	G	G	G	G	T	T	G	G	G	G	T	T	G	T	T	G	G	T	T	T	T	T	G	G	T	G	G	T	G	G	G	G	G	G	T	G	G	G	T
AX-109847552	G/C	1A	489502348	+	NA	NA	NA	NA	NA	NA	G	G	G	G	C	C	G	G	G	G	C	C	G	C	C	G	G	C	C	C	C	C	G	G	C	G	G	C	G	G	G	G	G	G	C	G	G	G	C
AX-86179352	C/T	1A	490313586	+	NA	NA	NA	NA	NA	NA	C	C	C	C	C	C	C	C	C	C	T	T	C	T	T	C	C	C	C	C	C	C	C	C	C	C	C	T	C	C	C	C	C	C	T	C	C	C	C
AX-86179353	C/T	1A	490313586	+	NA	NA	NA	NA	NA	NA	C	C	C	C	C	C	C	C	C	C	T	T	C	T	T	C	C	C	C	C	C	C	C	C	C	C	C	T	C	C	C	C	C	C	T	C	C	C	C
AX-94583334	A/G	1A	490414377	+	NA	NA	NA	NA	NA	NA	A	A	A	A	G	G	A	A	A	A	G	G	A	G	G	A	A	G	G	G	G	G	A	A	N	A	A	G	A	A	A	A	A	A	G	A	A	A	G
AX-111181186	T/C	1A	490414723	+	NA	NA	NA	NA	NA	NA	T	T	T	T	C	C	T	T	T	T	C	C	T	C	C	T	T	C	C	C	C	C	T	T	C	T	T	C	T	T	T	T	T	T	C	T	T	T	C
AX-109358415	G/A	1A	490525647	+	NA	NA	NA	NA	NA	NA	G	G	G	G	A	A	G	G	G	G	A	A	G	A	A	G	G	A	A	A	A	A	G	G	A	G	G	A	G	G	G	G	G	G	A	G	G	G	A
AX-111614735	C/T	1A	490531039	+	NA	NA	NA	NA	NA	NA	C	C	C	C	T	T	C	C	C	C	T	T	C	T	T	C	C	T	T	T	T	T	C	C	T	C	C	T	C	C	C	C	C	C	T	C	C	C	T
AX-110921717	G/A	1A	490882885	+	NA	NA	NA	NA	NA	NA	G	G	G	G	A	A	G	G	G	G	A	A	G	A	A	G	G	A	A	A	A	A	G	G	A	G	G	A	G	G	G	G	G	G	A	G	G	G	A
AX-109947439	C/T	1A	490988857	+	NA	NA	NA	NA	NA	NA	C	C	C	C	T	T	C	C	C	C	T	T	C	T	T	C	C	T	T	T	T	T	C	C	T	C	C	T	C	C	C	C	C	C	T	C	C	C	T
AX-111541693	T/G	1A	491155944	+	NA	NA	NA	NA	NA	NA	T	T	T	T	G	G	T	T	T	T	G	G	T	G	G	T	T	G	G	G	G	G	T	T	G	T	T	G	T	T	T	T	T	T	G	T	T	T	G
AX-111156946	A/G	1A	491303044	+	NA	NA	NA	NA	NA	NA	A	A	A	A	G	G	A	A	A	A	G	G	A	G	G	A	A	G	G	G	G	G	A	A	G	A	A	G	A	A	A	A	A	A	G	A	A	A	G
AX-109860740	T/C	1A	491309868	+	NA	NA	NA	NA	NA	NA	T	T	T	T	C	C	T	T	T	T	C	C	T	C	C	T	T	C	C	C	C	C	T	T	C	T	T	C	T	T	T	T	T	T	C	T	T	T	C
AX-110426231	G/A	1A	491770596	+	NA	NA	NA	NA	NA	NA	N	G	G	G	A	A	G	G	G	G	A	A	G	A	A	G	G	A	A	A	A	A	G	G	A	G	G	A	G	G	G	G	G	G	A	G	G	G	A
AX-110017752	G/A	1A	492123959	+	NA	NA	NA	NA	NA	NA	G	G	G	N	A	A	G	G	G	G	N	A	G	A	A	G	G	A	A	A	A	A	G	G	A	G	G	R	G	N	N	G	G	N	A	G	N	G	A
AX-95652007	G/A	1A	492123959	+	NA	NA	NA	NA	NA	NA	G	G	G	G	A	A	G	G	G	G	A	A	G	A	A	G	G	A	A	A	A	A	G	G	A	G	G	A	G	G	G	G	G	G	A	G	G	G	A
AX-110396000	C/G	1A	492189326	+	NA	NA	NA	NA	NA	NA	C	C	C	C	G	G	C	C	C	C	N	G	C	G	G	C	C	G	G	G	G	G	C	C	G	C	C	G	C	C	C	C	C	C	G	C	C	C	G
AX-110571551	A/G	1A	492278223	+	NA	NA	NA	NA	NA	NA	A	A	A	A	G	G	A	A	A	A	G	G	A	G	G	A	A	G	G	G	G	G	A	A	G	A	A	G	A	A	A	A	A	A	G	A	A	A	G
AX-111529217	C/T	1A	493937730	+	NA	NA	NA	NA	NA	NA	C	C	C	C	C	C	C	C	C	C	C	C	C	C	C	C	C	T	T	T	T	T	C	C	T	C	C	C	C	C	C	C	C	C	C	C	C	C	C
AX-111132713	A/G	1A	494355048	+	NA	NA	NA	NA	NA	NA	A	A	A	A	A	A	A	A	A	A	A	A	A	A	A	A	A	G	G	G	G	G	A	A	G	A	A	A	A	A	A	A	A	A	A	A	A	A	A
AX-108980349	A/T	1A	494448409	+	NA	NA	NA	NA	NA	NA	A	A	A	A	A	A	A	A	A	A	A	A	A	A	A	A	A	T	T	T	T	T	A	A	T	A	A	N	A	A	A	A	A	A	A	A	A	A	A
AX-111072719	C/T	1A	494449956	+	NA	NA	NA	NA	NA	NA	C	C	C	C	C	C	C	C	C	C	C	C	C	C	C	C	C	T	T	T	T	T	C	C	T	C	C	C	C	C	C	C	C	C	C	C	C	C	C
AX-179558038	C/T	1A	494449956	+	NA	NA	NA	NA	NA	NA	C	C	C	C	C	C	C	C	C	C	C	C	C	C	C	C	C	T	T	T	T	T	C	C	T	C	C	C	C	C	C	C	C	C	C	C	C	C	C
AX-111144497	G/A	1A	494726576	+	NA	NA	NA	NA	NA	NA	G	G	G	G	G	G	G	G	G	G	G	G	G	G	G	G	G	A	A	A	A	A	G	G	A	G	G	G	G	G	G	G	G	G	G	G	G	G	G
AX-109830408	C/A	1A	495036243	+	NA	NA	NA	NA	NA	NA	C	A	C	C	A	A	C	C	C	C	C	C	C	C	C	C	C	C	C	C	C	C	C	C	C	C	C	C	C	C	C	C	C	C	C	C	C	C	A
AX-110606043	A/G	1A	495036799	+	NA	NA	NA	NA	NA	NA	A	G	A	A	G	G	A	A	A	A	A	A	A	A	A	A	A	G	G	G	G	G	A	A	G	A	A	A	A	A	A	A	A	A	A	A	A	A	G
AX-111002026	A/G	1A	495037475	+	NA	NA	NA	NA	NA	NA	A	G	A	A	G	G	A	A	A	A	A	A	A	A	A	A	A	G	G	G	G	G	A	A	G	A	A	A	A	A	A	A	A	A	A	A	A	A	G
AX-111457419	C/T	1A	495116384	+	NA	NA	NA	NA	NA	NA	C	T	C	C	T	T	C	C	C	C	C	C	C	C	C	C	C	C	C	C	C	C	C	C	C	C	C	C	C	C	C	C	C	C	C	C	C	C	T
AX-95137321	T/G	1A	495579370	+	NA	NA	NA	NA	NA	NA	T	T	G	N	T	T	G	T	G	T	T	T	G	T	G	T	T	G	T	T	T	T	T	T	G	T	G	G	G	T	N	T	T	G	T	T	T	G	T
AX-94793478	C/T	1A	496089583	+	NA	NA	NA	NA	NA	NA	C	C	C	C	C	C	C	Y	C	C	C	C	C	C	Y	C	C	C	C	C	C	C	C	C	C	C	C	C	C	C	C	C	C	C	C	C	C	C	Y
AX-110687548	C/T	1A	496299584	+	NA	NA	NA	NA	NA	NA	C	T	C	T	T	T	C	C	C	C	T	T	C	T	T	C	C	C	C	C	C	C	C	C	C	C	T	T	C	C	C	C	C	C	T	C	C	C	T
AX-110934404	T/C	1A	496302932	+	NA	NA	NA	NA	NA	NA	T	C	T	C	C	C	T	T	T	T	C	C	T	C	C	T	T	T	T	T	T	T	T	T	T	T	C	C	T	T	T	T	T	T	C	T	T	T	C
AX-94504536	A/C	1A	496304609	+	NA	NA	NA	NA	NA	NA	A	C	A	C	C	C	A	A	A	A	C	C	A	C	C	A	A	A	A	A	A	A	A	A	A	A	C	C	A	A	A	A	A	A	C	A	A	A	C
AX-111455992	T/C	1A	496472835	+	NA	NA	NA	NA	NA	NA	T	C	T	C	C	C	T	T	T	T	C	C	T	C	C	T	T	T	T	T	T	T	T	T	T	T	C	C	T	T	T	T	T	T	C	T	T	T	C
AX-111181015	G/A	1A	496475073	+	NA	NA	NA	NA	NA	NA	G	A	G	A	A	A	G	G	G	G	A	A	G	A	A	G	G	G	G	G	G	G	G	G	G	G	A	A	G	G	G	G	G	G	A	G	G	G	A
AX-86166920	A/G	1A	496478834	+	NA	NA	NA	NA	NA	NA	A	R	A	R	R	R	A	A	A	A	R	R	A	R	R	A	A	A	A	A	A	A	A	A	A	A	N	R	A	A	A	A	A	A	R	A	A	A	R
AX-111805525	G/A	1A	496617356	+	NA	NA	NA	NA	NA	NA	G	A	G	A	A	A	G	G	G	G	A	A	G	A	A	G	G	G	G	G	G	G	G	G	G	G	A	A	G	G	G	G	G	G	A	G	G	G	A
AX-111708316	C/T	1A	496644078	+	NA	NA	NA	NA	NA	NA	C	T	C	T	T	T	C	C	C	C	T	T	C	T	T	C	C	C	C	C	C	C	C	C	C	C	T	T	C	C	C	C	C	C	T	C	C	C	T
AX-108741088	A/G	1A	496823510	+	NA	NA	NA	NA	NA	NA	A	G	A	G	G	G	A	A	A	A	G	G	A	G	G	A	A	A	A	A	A	A	A	A	A	A	G	G	A	A	A	A	A	A	G	A	A	A	G
AX-111155604	T/C	1A	496827782	+	NA	NA	NA	NA	NA	NA	T	C	T	C	C	C	T	T	T	T	C	C	T	C	C	T	T	T	T	T	T	T	T	T	T	T	C	C	T	T	T	T	T	T	C	T	T	T	C
AX-111617835	G/A	1A	496914131	+	NA	NA	NA	NA	NA	NA	G	A	G	A	A	A	G	G	G	G	A	A	G	A	A	G	G	G	G	G	G	G	G	G	G	G	A	A	G	G	G	G	G	G	A	G	G	G	A
AX-111060236	G/A	1A	497027415	+	NA	NA	NA	NA	NA	NA	G	A	G	A	A	A	G	G	G	G	A	A	G	A	A	G	G	G	G	G	G	G	G	G	G	G	A	A	G	G	G	G	G	G	A	G	G	G	A
AX-108927297	A/G	1A	497077151	+	NA	NA	NA	NA	NA	NA	A	A	A	G	A	A	A	A	A	A	G	G	A	G	G	A	A	A	A	A	A	A	A	A	A	A	G	G	A	A	A	A	A	A	G	A	A	A	A
AX-110421739	T/C	1A	497194411	+	NA	NA	NA	NA	NA	NA	T	T	T	C	T	T	T	T	T	T	C	C	T	C	C	T	T	T	T	T	T	T	T	T	T	T	C	C	T	T	T	T	T	T	C	T	T	T	T
AX-110091579	A/G	1A	497506253	+	NA	NA	NA	NA	NA	NA	A	A	A	A	A	A	A	A	A	A	A	A	A	A	A	A	A	A	A	A	A	A	A	A	A	A	A	A	A	A	A	A	A	A	A	A	A	A	A
AX-111020430	T/C	1A	497506927	+	NA	NA	NA	NA	NA	NA	T	C	T	C	C	C	T	T	T	T	C	C	T	C	C	T	T	T	T	T	T	T	T	T	T	T	C	C	T	T	T	T	T	T	C	T	T	T	C
AX-94773962	A/G	1A	497507757	+	NA	NA	NA	NA	NA	NA	A	A	A	A	A	A	A	A	A	A	A	A	A	A	A	A	A	A	A	A	A	A	A	A	A	A	A	A	A	A	A	A	A	A	A	A	A	A	A
AX-95008533	C/T	1A	497518150	+	NA	NA	NA	NA	NA	NA	C	T	C	T	T	T	C	C	C	C	T	T	C	T	T	C	C	C	C	C	C	C	C	C	C	C	T	T	C	C	C	C	C	C	T	C	C	C	T
AX-95630479	T/C	1A	497522675	+	NA	NA	NA	NA	NA	NA	T	C	T	C	C	C	T	N	T	T	C	C	T	C	C	T	T	T	T	T	T	T	T	T	T	N	C	C	T	T	T	T	N	T	N	N	N	T	C
AX-109474715	A/T	1A	497545239	+	NA	NA	NA	NA	NA	NA	A	T	A	T	T	T	A	A	A	A	T	T	A	T	T	A	A	A	A	A	A	A	A	A	A	A	T	T	A	A	A	A	A	A	T	A	A	A	T
AX-108911339	C/T	1A	497749388	+	NA	NA	NA	NA	NA	NA	C	C	C	C	C	C	C	C	C	C	C	C	C	C	C	C	C	C	C	C	C	C	C	C	C	C	C	C	C	C	C	C	C	C	C	C	C	C	C
AX-109882536	T/C	1A	497783899	+	NA	NA	NA	NA	NA	NA	T	C	T	C	C	C	T	T	T	T	C	C	T	C	C	T	T	T	T	T	T	T	T	T	T	T	C	C	T	T	T	T	T	T	C	T	T	T	C
AX-110496490	A/G	1A	497872630	+	NA	NA	NA	NA	NA	NA	A	A	A	A	A	A	A	A	A	A	A	A	A	A	A	A	A	A	A	A	A	A	A	A	A	A	A	A	A	A	A	A	A	A	A	A	A	A	A
AX-110650608	C/T	1A	497903897	+	NA	NA	NA	NA	NA	NA	C	T	C	T	T	T	C	C	C	C	T	T	C	T	T	C	C	C	C	C	C	C	C	C	C	C	T	T	C	C	C	C	C	C	T	C	C	C	T
AX-111748260	G/A	1A	497903987	+	NA	NA	NA	NA	NA	NA	G	A	G	A	A	A	G	G	G	G	A	A	G	A	A	G	G	G	G	G	G	G	G	G	G	G	A	A	G	G	G	G	G	G	A	G	G	G	A
AX-111062624	C/T	1A	497935929	+	NA	NA	NA	NA	NA	NA	C	T	C	T	T	T	C	C	C	C	T	T	C	T	T	C	C	C	C	C	C	C	C	C	C	C	T	T	C	C	C	C	C	C	T	C	C	C	T
AX-86173986	A/C	1A	498048808	+	NA	NA	NA	NA	NA	NA	A	C	A	C	C	C	A	A	A	A	C	C	A	C	C	A	A	A	A	A	A	A	A	A	A	A	C	C	A	A	A	A	A	A	C	A	A	A	C
AX-89352458	C/T	1A	498064924	+	NA	NA	NA	NA	NA	NA	C	C	C	C	T	T	C	C	C	C	C	C	C	C	C	C	C	C	C	C	C	C	T	C	C	C	C	T	C	C	C	C	C	C	C	C	C	C	C
AX-110948247	G/A	1A	498143245	+	NA	NA	NA	NA	NA	NA	G	G	G	A	G	G	G	G	G	G	A	A	G	A	A	G	G	G	G	G	G	G	G	G	G	G	A	A	R	R	R	G	G	R	A	G	G	G	G
AX-110052042	C/T	1A	498180790	+	NA	NA	NA	NA	NA	NA	C	C	C	T	C	C	C	C	C	C	T	T	C	T	T	C	C	C	C	C	C	C	C	C	C	C	T	T	C	C	C	C	C	C	T	C	C	C	C
AX-109839508	A/G	1A	498198692	+	NA	NA	NA	NA	NA	NA	A	A	A	G	A	A	A	A	A	A	G	G	A	G	G	A	A	A	A	A	A	A	A	A	A	A	G	G	A	A	A	A	A	A	G	A	A	A	A
AX-110964010	T/C	1A	498208932	+	NA	NA	NA	NA	NA	NA	T	T	T	C	T	T	T	T	T	T	C	C	T	C	C	T	T	T	T	T	T	T	T	T	T	T	C	C	T	T	T	T	T	T	C	T	T	T	T
AX-111775504	G/A	1A	498251246	+	NA	NA	NA	NA	NA	NA	G	G	G	N	G	G	G	R	R	R	A	A	G	A	A	G	G	R	R	R	G	G	R	R	R	R	A	A	G	G	R	G	G	G	A	R	G	G	G
AX-110950983	A/G	1A	498251453	+	NA	NA	NA	NA	NA	NA	A	A	A	G	A	A	A	A	A	A	G	G	A	G	G	A	A	A	A	A	A	A	A	A	A	A	G	G	A	A	A	A	A	A	G	A	A	A	A
AX-110054605	C/T	1A	498323122	+	NA	NA	NA	NA	NA	NA	C	C	C	T	C	C	C	C	C	C	T	T	C	T	T	C	C	C	C	C	C	C	C	C	C	C	T	T	C	C	C	C	C	C	T	C	C	C	C
AX-111122143	G/T	1A	498393472	+	NA	NA	NA	NA	NA	NA	G	G	G	T	G	G	G	G	G	G	T	T	G	T	T	G	G	G	G	G	G	G	G	G	G	G	T	T	G	G	G	G	G	G	T	G	G	G	G
AX-110028168	A/T	1A	498396536	+	NA	NA	NA	NA	NA	NA	A	A	A	T	A	A	A	A	A	A	T	T	A	T	T	A	A	A	A	A	A	A	A	A	A	A	T	T	A	A	A	A	A	A	T	A	A	A	A
AX-111107440	C/A	1A	498451495	+	NA	NA	NA	NA	NA	NA	C	C	C	A	C	C	C	C	C	C	A	A	C	A	A	C	C	C	C	C	C	C	C	C	C	C	A	A	C	C	C	C	C	C	A	C	C	C	C
AX-110625841	G/A	1A	498531051	+	NA	NA	NA	NA	NA	NA	G	G	G	A	G	G	G	G	G	G	A	A	G	A	A	G	G	G	G	G	G	G	G	G	G	G	A	A	G	G	G	G	G	G	A	G	G	G	G
AX-110967314	C/G	1A	498599007	+	NA	NA	NA	NA	NA	NA	C	C	C	G	C	C	C	C	C	C	G	G	C	G	G	C	C	C	C	C	C	C	C	C	C	C	G	G	C	C	C	C	C	C	G	C	C	C	C
AX-94914663	A/G	1A	498807548	+	NA	NA	NA	NA	NA	NA	A	A	A	G	A	A	A	A	A	A	G	G	A	G	G	A	A	A	A	A	A	A	A	A	A	A	G	G	A	A	A	A	A	A	G	A	A	A	A
AX-86167092	T/C	1A	498811359	+	NA	NA	NA	NA	NA	NA	T	T	T	N	T	T	T	T	T	T	C	C	T	C	C	T	T	T	T	T	T	T	T	T	T	T	C	C	T	T	T	T	T	T	C	T	T	T	T
AX-86167093	T/C	1A	498811359	+	NA	NA	NA	NA	NA	NA	T	T	T	C	T	T	T	T	T	T	C	C	T	C	C	T	T	T	T	T	T	T	T	T	T	T	C	C	T	T	T	T	T	T	C	T	T	T	T
AX-111607353	T/C	1A	498811477	+	NA	NA	NA	NA	NA	NA	T	T	T	C	T	T	T	T	T	T	C	C	T	C	C	T	T	T	T	T	T	T	T	T	T	T	C	C	T	T	T	T	T	T	C	T	T	T	T
AX-111015374	G/A	1A	499178831	+	NA	NA	NA	NA	NA	NA	G	G	G	A	G	G	G	G	G	G	A	A	G	A	A	G	G	G	G	G	G	G	G	G	G	G	A	A	G	G	G	G	G	G	A	G	G	G	G
AX-110912803	A/T	1A	499200037	+	NA	NA	NA	NA	NA	NA	A	A	A	T	A	A	A	A	A	A	T	T	A	T	T	A	A	A	A	A	A	A	A	A	A	N	T	N	A	A	A	A	A	A	T	A	A	A	A
AX-111109856	T/C	1A	499211066	+	NA	NA	NA	NA	NA	NA	T	T	T	C	T	T	T	T	T	T	C	C	T	C	C	T	T	T	T	T	T	T	T	T	T	T	C	C	T	T	T	T	T	T	C	T	T	T	T
AX-110740005	T/C	1A	499267185	+	NA	NA	NA	NA	NA	NA	T	T	T	C	T	T	T	T	T	T	C	C	T	C	C	T	T	T	T	T	T	T	T	T	T	T	C	C	T	T	T	T	T	T	C	T	T	T	T
AX-111235717	T/G	1A	499354213	+	NA	NA	NA	NA	NA	NA	T	T	T	G	T	T	T	T	T	T	G	G	T	G	G	T	T	T	T	T	T	T	T	T	T	T	G	G	T	T	T	T	T	T	G	T	T	T	T
AX-111054050	G/A	1A	499439387	+	NA	NA	NA	NA	NA	NA	G	G	N	A	G	G	G	G	G	G	A	A	G	A	A	G	G	G	G	G	G	G	G	G	G	G	A	A	G	G	G	G	G	G	A	G	G	G	G
AX-179477300	C/T	1A	499797539	+	NA	NA	NA	NA	NA	NA	C	C	T	T	C	C	C	T	C	C	C	C	T	C	T	C	C	C	C	C	C	C	C	C	T	C	C	C	T	C	T	C	C	T	C	C	C	T	C
AX-95235178	T/G	1A	499807792	+	NA	NA	NA	NA	NA	NA	T	G	T	G	G	G	T	T	T	T	T	T	T	T	T	T	T	T	T	T	T	T	T	T	T	T	G	T	T	T	T	T	T	T	T	T	T	T	G
AX-109289388	C/T	1A	499808329	+	NA	NA	NA	NA	NA	NA	C	T	C	T	T	T	C	C	C	C	C	C	C	C	C	C	C	C	C	C	C	C	C	C	C	C	T	C	C	C	C	C	C	C	C	C	C	C	T
AX-111484249	C/G	1A	499972447	+	NA	NA	NA	NA	NA	NA	C	G	C	G	G	G	C	C	C	C	C	C	C	C	C	C	C	C	C	C	C	C	C	C	C	C	G	C	C	C	C	C	C	C	C	C	C	C	G
AX-110927014	T/C	1A	499980905	+	NA	NA	NA	NA	NA	NA	T	C	T	C	C	C	T	T	T	T	T	T	T	T	T	T	T	T	T	T	T	T	T	T	T	T	C	T	T	T	T	T	T	T	T	T	T	T	C
AX-108768123	C/A	1A	500284829	+	NA	NA	NA	NA	NA	NA	C	A	C	A	A	A	C	C	C	C	C	C	C	C	C	C	C	C	C	C	C	C	C	C	C	C	A	C	C	C	C	C	C	C	C	C	C	C	A
AX-89634322	G/A	1A	500419401	+	NA	NA	NA	NA	NA	NA	G	A	G	A	A	A	G	G	G	G	G	G	G	G	G	G	G	A	G	G	G	G	G	G	G	G	A	G	G	G	G	G	G	G	G	G	G	G	A
AX-111776783	A/G	1A	500475864	+	NA	NA	NA	NA	NA	NA	A	G	A	A	G	G	A	A	A	A	A	A	A	A	A	A	A	A	A	A	A	A	A	A	A	A	A	A	A	A	A	A	A	A	A	A	A	A	G
AX-86164111	C/T	1A	500563539	+	NA	NA	NA	NA	NA	NA	C	T	C	C	T	T	C	C	C	C	C	C	C	C	C	C	C	C	C	C	C	C	C	C	C	C	C	C	C	C	C	C	C	C	C	C	C	C	T
AX-111071577	G/C	1A	500564529	+	NA	NA	NA	NA	NA	NA	G	C	G	C	C	C	G	G	G	G	G	G	G	G	G	G	G	C	G	G	G	G	G	G	G	G	C	G	G	G	G	G	G	G	G	G	G	G	C
AX-111135532	A/G	1A	500840476	+	NA	NA	NA	NA	NA	NA	A	G	A	A	G	G	A	A	A	A	A	A	A	A	A	A	A	A	A	A	A	A	A	A	A	A	A	A	A	A	A	A	A	A	N	A	A	A	G
AX-110675424	G/A	1A	500965938	+	NA	NA	NA	NA	NA	NA	G	G	G	G	G	G	G	G	G	G	A	A	G	A	A	G	G	G	G	G	G	G	G	G	G	G	G	A	G	G	G	G	G	G	A	G	G	G	G
AX-109056654	T/G	1A	500973965	+	NA	NA	NA	NA	NA	NA	T	T	T	T	T	T	T	T	T	T	G	G	T	G	G	T	T	T	T	T	T	T	T	T	T	T	T	G	T	T	T	T	T	T	G	T	T	T	T
AX-86164645	C/T	1A	500980417	+	NA	NA	NA	NA	NA	NA	C	T	C	N	T	T	C	C	C	C	C	C	C	N	C	C	C	C	C	C	C	C	C	C	C	C	C	C	C	C	C	C	N	C	C	C	C	C	N
AX-86164646	C/T	1A	500980417	+	NA	NA	NA	NA	NA	NA	C	T	C	C	T	T	C	C	C	C	C	C	C	C	C	C	C	C	C	C	C	C	C	C	C	C	C	C	C	C	C	C	C	C	C	C	C	C	T
AX-108834888	C/T	1A	501162542	+	NA	NA	NA	NA	NA	NA	C	C	C	C	C	C	C	C	C	C	T	T	C	T	T	C	C	C	C	C	C	C	C	C	C	C	C	T	C	C	C	C	C	C	T	C	C	C	C
AX-111591884	G/C	1A	501343140	+	NA	NA	NA	NA	NA	NA	G	G	G	G	G	G	G	G	G	G	C	C	G	C	C	G	G	G	G	G	G	G	G	G	G	G	G	C	G	G	G	G	G	G	C	G	G	G	G
AX-110051236	C/T	1A	501641643	+	NA	NA	NA	NA	NA	NA	C	C	C	C	C	C	C	Y	C	C	N	N	Y	N	T	C	C	Y	C	C	C	Y	C	C	C	Y	Y	T	Y	Y	Y	C	C	Y	T	C	Y	C	C
AX-95188181	G/C	1A	502804981	+	NA	NA	NA	NA	NA	NA	G	S	G	S	S	S	G	G	G	G	G	G	G	G	G	G	G	S	G	G	G	G	G	G	G	G	S	G	G	G	G	G	G	G	G	G	G	G	G
AX-109841797	A/G	1A	502810071	+	NA	NA	NA	NA	NA	NA	A	A	A	A	A	A	A	A	A	A	G	G	A	G	G	A	A	A	A	A	A	A	A	A	A	A	A	G	A	A	A	A	A	A	G	A	A	A	A
AX-109307949	A/G	1A	502822105	+	NA	NA	NA	NA	NA	NA	A	G	A	A	G	G	A	A	A	A	A	A	A	A	A	A	A	G	A	A	A	A	A	A	A	A	A	A	A	A	A	A	A	A	A	A	A	A	A
AX-108781128	C/T	1A	502822723	+	NA	NA	NA	NA	NA	NA	C	T	C	T	T	T	C	C	C	C	C	C	C	C	C	C	C	T	C	C	C	C	C	C	C	C	T	C	C	C	C	C	C	C	C	C	C	C	T
AX-95629393	C/T	1A	503312413	+	NA	NA	NA	NA	NA	NA	C	T	C	T	T	T	C	C	C	C	T	T	C	T	T	C	C	T	C	C	C	C	C	C	C	C	T	T	C	C	C	C	C	C	T	C	C	C	C
AX-86184775	T/C	1A	503369210	+	NA	NA	NA	NA	NA	NA	T	T	T	T	T	T	T	T	T	T	T	T	T	T	T	T	T	C	T	T	T	T	T	T	T	T	T	T	T	T	T	T	T	T	T	T	T	T	T
AX-109322069	C/T	1A	503369485	+	NA	NA	NA	NA	NA	NA	C	C	C	C	C	C	C	C	C	C	T	T	C	T	T	C	C	C	C	C	C	C	C	C	C	C	C	T	C	C	C	C	C	C	T	C	C	C	C
AX-112290311	G/T	1A	503372673	+	NA	NA	NA	NA	NA	NA	G	G	G	G	G	G	G	G	G	G	G	G	G	G	G	G	G	T	G	G	G	G	G	G	G	G	G	G	G	G	N	G	G	G	G	G	G	G	G
AX-94424722	T/C	1A	503376333	+	NA	NA	NA	NA	NA	NA	T	T	T	T	T	T	T	T	T	T	T	T	T	T	T	T	T	C	T	T	T	T	T	T	T	T	T	T	T	T	T	T	T	T	T	T	T	T	C
AX-110998252	C/T	1A	503549325	+	NA	NA	NA	NA	NA	NA	C	T	C	T	T	T	C	C	C	C	C	C	C	C	C	C	C	C	C	C	C	C	C	C	C	C	T	C	C	C	C	C	C	C	C	C	C	C	T
AX-110108262	G/A	1A	504029454	+	NA	NA	NA	NA	NA	NA	G	A	G	A	A	A	G	G	G	G	G	G	G	G	G	G	G	G	G	G	G	G	G	G	G	G	A	G	G	G	G	G	R	G	G	A	G	G	A
AX-111824379	C/T	1A	504091788	+	NA	NA	NA	NA	NA	NA	C	T	C	T	T	T	C	C	C	C	C	C	C	C	C	C	C	C	C	C	C	C	C	C	C	C	T	C	C	C	C	C	C	C	C	C	C	C	T
AX-110397023	C/T	1A	504108363	+	NA	NA	NA	NA	NA	NA	C	T	C	T	T	T	C	C	C	C	C	C	C	C	C	C	C	C	C	C	C	C	C	C	C	C	T	C	C	C	C	C	C	C	C	C	C	C	T
AX-94631158	T/C	1A	504239805	+	NA	NA	NA	NA	NA	NA	T	C	T	C	C	C	T	T	T	T	C	C	T	C	C	T	T	C	T	T	T	T	T	T	T	T	N	C	T	T	T	T	N	T	C	T	T	T	C
AX-179388199	G/A	1A	504242218	+	NA	NA	NA	NA	NA	NA	G	G	G	G	G	G	G	G	G	G	A	A	G	A	A	G	G	A	G	G	G	G	G	G	G	G	G	A	G	G	G	G	G	G	A	G	G	G	G
AX-95662104	G/A	1A	504242218	+	NA	NA	NA	NA	NA	NA	G	G	G	G	G	G	G	G	G	G	A	A	G	A	A	G	G	A	G	G	G	G	G	G	G	G	G	A	G	G	G	G	G	G	A	G	G	G	G
AX-94816253	A/T	1A	504243660	+	NA	NA	NA	NA	NA	NA	A	T	A	T	T	T	A	A	A	A	T	T	A	T	T	A	A	T	A	A	A	A	A	A	A	A	T	T	A	A	A	A	A	A	T	A	A	A	T
AX-109747166	A/G	1A	504244687	+	NA	NA	NA	NA	NA	NA	A	A	A	A	A	A	A	A	A	A	G	G	A	G	G	A	A	G	A	A	A	A	A	A	A	A	A	G	A	A	A	A	A	A	G	A	A	A	A
AX-94644377	G/T	1A	504246182	+	NA	NA	NA	NA	NA	NA	G	G	G	G	G	G	G	G	G	G	G	G	G	G	G	G	G	G	G	G	G	G	G	G	G	G	G	G	G	G	G	G	G	G	G	G	G	G	T
AX-86177872	C/T	1A	504246961	+	NA	NA	NA	NA	NA	NA	C	C	C	C	C	C	C	C	C	C	C	C	C	C	C	C	C	C	C	C	C	C	C	C	C	C	C	C	C	C	C	N	C	C	C	C	C	C	T
AX-86177873	T/C	1A	504246961	+	NA	NA	NA	NA	NA	NA	T	C	T	C	C	C	T	T	T	T	N	C	T	C	C	T	T	C	T	T	T	T	T	T	T	T	C	C	T	T	T	T	T	T	C	T	T	T	T
AX-110099156	G/T	1A	504582248	+	NA	NA	NA	NA	NA	NA	G	T	G	G	T	T	G	G	G	G	T	T	G	T	T	G	G	G	G	G	G	G	G	G	G	G	G	T	G	G	G	G	G	G	T	G	G	G	T
AX-111533298	C/A	1A	505265767	+	NA	NA	NA	NA	NA	NA	C	C	C	C	C	C	C	C	C	C	C	C	C	C	C	C	C	C	C	C	C	C	C	C	C	C	C	C	C	C	C	C	C	C	C	C	C	C	C
AX-179557745	A/G	1A	505338262	+	NA	NA	NA	NA	NA	NA	A	A	A	N	A	A	A	A	A	A	A	A	A	A	A	A	A	A	A	A	A	A	A	A	A	A	A	A	A	A	A	A	A	A	A	A	A	A	A
AX-95630294	A/G	1A	505338262	+	NA	NA	NA	NA	NA	NA	A	A	A	A	A	A	A	A	A	A	A	A	A	A	A	A	A	A	A	A	A	A	A	A	A	A	A	A	A	A	A	A	A	A	A	A	A	A	A
AX-86175848	T/C	1A	505471057	+	NA	NA	NA	NA	NA	NA	T	C	T	T	C	C	T	T	T	T	T	T	T	T	T	T	T	T	T	T	T	T	T	T	T	T	T	T	T	T	T	T	T	T	T	T	T	T	T
AX-109424827	T/G	1A	505541883	+	NA	NA	NA	NA	NA	NA	T	T	T	T	T	T	T	T	K	T	T	T	T	T	T	T	T	T	T	T	T	T	T	T	T	T	K	T	T	T	T	T	T	T	T	T	T	T	T
AX-110389555	C/A	1A	505668173	+	NA	NA	NA	NA	NA	NA	C	C	C	A	C	C	C	C	C	C	C	C	C	C	C	C	C	C	C	C	C	C	C	C	C	C	A	C	C	C	C	C	C	C	C	C	C	C	C
AX-179560155	C/A	1A	506283712	+	NA	NA	NA	NA	NA	NA	C	A	C	A	A	A	C	C	C	C	A	A	C	A	A	C	C	C	C	C	C	C	C	C	C	C	A	A	C	C	C	C	C	C	A	C	C	C	C
AX-95631819	C/A	1A	506283712	+	NA	NA	NA	NA	NA	NA	C	A	C	A	A	A	C	C	C	C	A	A	C	A	A	C	C	C	C	C	C	C	C	C	C	C	A	A	C	C	C	C	C	C	A	C	C	C	C
AX-108783738	A/G	1A	506283827	+	NA	NA	NA	NA	NA	NA	A	G	A	G	G	G	A	A	A	A	G	G	A	G	G	A	A	A	A	A	A	A	A	A	A	A	G	G	A	A	A	A	A	A	G	A	A	A	A
AX-179559258	A/G	1A	506283827	+	NA	NA	NA	NA	NA	NA	A	G	A	G	G	G	A	A	A	A	G	G	A	G	G	A	A	A	A	A	A	A	A	A	A	A	G	G	A	A	A	A	A	A	G	A	A	A	A
AX-112288757	T/C	1A	506546795	+	NA	NA	NA	NA	NA	NA	T	C	T	C	C	C	T	T	T	T	C	C	T	C	C	T	T	T	T	T	T	T	T	T	T	T	C	C	T	T	T	T	T	T	C	T	T	T	T
AX-95653913	T/C	1A	506546795	+	NA	NA	NA	NA	NA	NA	T	C	T	C	C	C	T	T	T	T	C	C	T	C	C	T	T	T	T	T	T	T	T	T	T	T	C	C	T	T	T	T	T	T	C	T	T	T	T
AX-112287704	C/T	1A	506547570	+	NA	NA	NA	NA	NA	NA	C	T	C	T	T	T	C	C	C	C	T	T	C	T	T	C	C	C	C	C	C	C	C	C	C	C	T	T	C	C	C	C	C	C	T	C	C	C	C
AX-179559604	C/T	1A	506547570	+	NA	NA	NA	NA	NA	NA	C	T	C	T	T	T	C	C	C	C	T	T	C	T	T	C	C	C	C	C	C	C	C	C	C	C	T	T	C	C	C	C	C	C	T	C	C	C	C
AX-179559120	A/G	1A	506553647	+	NA	NA	NA	NA	NA	NA	A	G	A	G	G	G	A	A	A	A	G	G	A	G	G	A	A	A	A	A	A	A	A	A	A	A	G	G	A	A	A	A	A	A	G	A	A	A	A
AX-95658713	A/G	1A	506553647	+	NA	NA	NA	NA	NA	NA	A	G	A	G	G	G	A	A	A	A	G	G	A	G	G	A	A	A	A	A	A	A	A	A	A	A	G	G	A	A	A	A	A	A	G	A	A	A	A
AX-178075830	A/G	1A	506854586	+	NA	NA	NA	NA	NA	NA	A	G	A	G	G	G	A	A	A	A	N	G	A	G	G	A	N	A	A	A	A	A	A	A	A	A	G	G	A	A	A	A	A	A	G	A	A	A	A
AX-94987165	A/G	1A	506854586	+	NA	NA	NA	NA	NA	NA	A	G	A	G	G	G	A	A	A	A	G	G	A	G	G	A	A	A	A	A	A	A	A	A	A	A	G	G	A	A	A	A	A	A	G	A	A	A	R
AX-110545246	C/T	1A	507077430	+	NA	NA	NA	NA	NA	NA	C	C	C	C	C	C	C	C	C	C	T	T	C	T	T	C	C	C	C	C	C	C	C	C	C	C	C	T	C	C	C	C	C	C	T	C	C	C	C
AX-109276285	A/G	1A	507078569	+	NA	NA	NA	NA	NA	NA	A	A	A	A	A	A	A	A	A	A	G	G	A	G	G	A	A	A	A	A	A	A	A	A	A	A	A	G	A	A	A	A	A	A	G	A	A	A	A
AX-179559826	A/G	1A	507078569	+	NA	NA	NA	NA	NA	NA	A	A	A	A	A	A	A	A	A	A	G	G	A	G	G	A	A	A	A	A	A	A	A	A	A	A	A	G	A	A	A	A	A	A	G	A	A	A	A
AX-94449293	C/T	1A	507079282	+	NA	NA	NA	NA	NA	NA	C	T	C	T	T	T	C	C	C	C	T	T	C	T	T	C	C	C	C	C	C	C	C	C	C	C	T	T	C	C	C	C	C	C	T	C	C	C	C
AX-95652309	C/T	1A	507079282	+	NA	NA	NA	NA	NA	NA	C	T	C	T	T	T	C	C	C	C	T	T	C	T	T	C	C	C	C	C	C	C	C	C	C	C	T	T	C	C	C	C	C	C	T	C	C	C	C
AX-111084655	T/G	1A	507086895	+	NA	NA	NA	NA	NA	NA	T	G	T	G	G	G	T	T	T	T	G	G	T	G	G	T	T	T	T	T	T	T	T	T	T	T	G	G	T	T	T	T	T	T	G	T	T	T	T
AX-111614788	G/C	1A	507253353	+	NA	NA	NA	NA	NA	NA	G	G	G	G	G	G	G	G	G	G	C	C	G	C	C	G	G	G	G	G	G	G	G	G	G	G	G	C	G	G	G	G	G	G	C	G	G	G	G
AX-110927081	C/T	1A	507835798	+	NA	NA	NA	NA	NA	NA	C	C	C	C	C	C	C	C	C	C	T	T	C	T	T	C	C	C	C	C	C	C	C	C	C	C	C	T	C	C	C	C	C	C	T	C	C	C	C
AX-111556984	T/C	1A	507954596	+	NA	NA	NA	NA	NA	NA	T	T	T	T	T	T	T	T	T	T	C	C	T	C	N	T	T	T	T	T	T	T	T	T	T	T	T	C	T	T	T	T	T	T	C	T	T	T	T
AX-111079307	A/G	1A	507969631	+	NA	NA	NA	NA	NA	NA	A	A	A	A	A	A	A	A	A	A	G	G	A	G	G	A	A	A	A	A	A	A	A	A	A	A	A	G	A	A	A	A	A	A	G	A	A	A	A
AX-111063889	C/T	1A	507975519	+	NA	NA	NA	NA	NA	NA	C	C	C	C	C	C	C	C	C	C	T	T	C	T	T	C	C	C	C	C	C	C	C	C	C	C	C	T	C	C	C	C	C	C	T	C	C	C	C
AX-110972166	T/G	1A	507983595	+	NA	NA	NA	NA	NA	NA	T	G	T	G	G	G	T	T	T	T	G	G	T	G	G	T	T	T	T	T	T	T	T	T	T	T	G	G	T	T	T	T	T	T	G	T	T	T	T
AX-111568685	T/C	1A	508038044	+	NA	NA	NA	NA	NA	NA	T	T	T	T	T	T	T	T	T	T	C	C	T	C	C	T	T	T	T	T	T	T	T	T	T	T	T	C	T	T	T	T	T	T	C	T	T	T	T
AX-110475704	T/C	1A	508525935	+	NA	NA	NA	NA	NA	NA	T	T	T	T	T	T	T	T	T	T	C	C	T	C	C	T	T	T	T	T	T	T	T	T	T	T	T	C	T	T	T	T	T	T	C	T	T	T	T
AX-95651902	A/G	1A	508527866	+	NA	NA	NA	NA	NA	NA	A	A	A	A	A	A	A	A	A	A	G	G	A	G	G	A	A	A	A	A	A	A	A	A	A	A	A	G	A	A	A	A	A	A	G	A	A	A	A
AX-95246262	G/T	1A	508638302	+	NA	NA	NA	NA	NA	NA	G	G	G	G	G	G	G	G	G	G	T	T	G	T	T	G	G	G	G	G	G	G	G	G	G	G	G	T	G	G	G	G	G	G	T	G	G	G	T
AX-94433348	A/G	1A	508721263	+	NA	NA	NA	NA	NA	NA	G	G	G	A	G	G	G	A	G	A	A	A	A	A	A	G	G	A	A	A	G	A	A	A	A	A	A	A	A	A	A	G	A	A	A	G	A	G	G
AX-110623900	G/A	1A	508723770	+	NA	NA	NA	NA	NA	NA	G	G	G	G	G	G	G	G	G	G	A	A	G	A	A	G	G	A	G	G	G	G	G	G	G	G	G	A	G	G	G	G	G	G	A	G	G	G	G
AX-94519549	C/A	1A	508723994	+	NA	NA	NA	NA	NA	NA	C	C	C	C	C	C	C	C	C	C	A	A	C	A	A	C	C	A	C	C	C	C	C	C	C	C	C	A	C	C	C	C	C	C	A	C	C	C	C
AX-86170658	G/A	1A	508725967	+	NA	NA	NA	NA	NA	NA	G	G	G	G	G	G	G	G	G	G	A	A	G	A	A	G	G	A	G	G	G	G	G	G	G	G	G	A	G	G	G	G	G	G	A	G	G	G	A
AX-86170659	G/A	1A	508725967	+	NA	NA	NA	NA	NA	NA	G	G	G	G	G	G	G	G	G	G	A	A	G	A	A	G	G	A	G	G	G	G	G	G	G	G	G	A	G	G	G	G	G	G	A	G	G	G	A
AX-110417784	C/A	1A	508841109	+	NA	NA	NA	NA	NA	NA	C	C	C	C	C	C	C	C	C	C	C	C	C	C	C	C	C	A	C	C	C	C	C	C	C	C	C	C	C	C	C	C	C	C	C	C	C	C	A
AX-95071361	T/C	1A	508925607	+	NA	NA	NA	NA	NA	NA	T	T	T	T	T	T	T	T	T	T	C	C	T	C	C	T	T	C	T	T	T	T	T	T	T	T	T	C	T	T	T	T	T	T	C	T	T	T	C
AX-95236907	G/A	1A	509037543	+	NA	NA	NA	NA	NA	NA	G	A	G	G	A	A	G	G	G	G	G	G	G	G	G	G	G	G	G	G	G	G	G	G	G	G	G	G	G	G	R	A	G	G	G	G	G	G	A
AX-111040673	T/G	1A	510300888	+	NA	NA	NA	NA	NA	NA	T	T	T	G	T	T	T	T	T	T	G	T	T	G	G	T	T	G	T	T	T	T	T	T	T	T	G	G	T	T	T	T	T	T	G	T	T	T	G
AX-109337524	A/G	1A	510349266	+	NA	NA	NA	NA	NA	NA	A	A	A	A	A	A	A	A	A	A	A	A	A	A	A	A	A	A	A	A	A	A	A	A	A	A	A	A	A	A	A	A	A	A	A	A	A	A	G
AX-110963054	G/A	1A	510374566	+	NA	NA	NA	NA	NA	NA	G	G	G	G	G	G	G	G	G	G	G	G	G	G	G	G	G	G	G	G	G	G	G	G	G	G	G	G	G	G	G	G	G	G	G	G	G	G	A
AX-109972550	C/T	1A	510374603	+	NA	NA	NA	NA	NA	NA	C	C	C	T	C	C	C	C	C	C	C	C	C	C	C	C	C	T	C	C	C	C	C	C	C	C	T	C	C	C	C	C	C	C	C	C	C	C	T
AX-111597788	T/C	1A	510443499	+	NA	NA	NA	NA	NA	NA	T	T	T	C	T	T	T	T	T	T	C	T	T	C	C	T	T	C	T	T	T	T	T	T	T	T	C	C	T	T	T	T	T	T	C	T	T	T	C
AX-111669423	T/C	1A	510444360	+	NA	NA	NA	NA	NA	NA	T	T	T	T	T	T	T	T	T	T	C	T	T	C	C	T	T	T	T	T	T	T	T	T	T	T	T	C	T	T	T	T	T	T	C	T	T	T	C
AX-109273305	C/T	1A	510448514	+	NA	NA	NA	NA	NA	NA	C	C	C	C	C	C	C	C	C	C	C	C	C	C	C	C	C	C	C	C	C	C	C	C	C	C	C	C	C	C	C	C	C	C	C	C	C	C	T
AX-111620282	A/G	1A	510451267	+	NA	NA	NA	NA	NA	NA	A	A	A	A	A	A	A	A	A	A	A	A	A	A	A	A	A	A	A	A	A	A	A	A	A	A	A	A	A	A	A	A	A	A	A	A	A	A	G
AX-110005694	C/T	1A	510528055	+	NA	NA	NA	NA	NA	NA	C	C	C	C	C	C	C	C	C	C	Y	C	C	Y	Y	C	C	C	C	C	C	C	C	C	C	C	C	Y	C	C	C	C	C	C	Y	C	C	C	T
AX-110367484	G/C	1A	510536490	+	NA	NA	NA	NA	NA	NA	G	G	G	C	G	G	G	G	G	G	C	G	G	C	C	G	G	C	G	G	G	G	G	G	G	G	C	C	G	G	G	G	G	G	C	G	G	G	C
AX-109345497	C/G	1A	510754509	+	NA	NA	NA	NA	NA	NA	C	C	C	C	C	C	C	C	C	C	G	C	C	G	G	C	C	C	C	C	C	C	C	C	C	C	C	G	C	C	C	C	C	C	G	C	C	C	G
AX-109412792	C/A	1A	510760636	+	NA	NA	NA	NA	NA	NA	C	C	C	C	C	C	C	C	C	C	A	C	C	A	A	C	C	C	C	C	C	C	C	C	C	C	C	A	C	C	C	C	C	C	A	C	C	C	A
AX-95653143	C/T	1A	511502175	+	NA	NA	NA	NA	NA	NA	T	T	T	C	T	T	T	C	C	C	C	C	C	C	C	C	C	C	C	C	C	C	C	C	C	C	C	C	C	C	C	T	C	C	C	C	C	C	T
AX-109371208	G/C	1A	512639517	+	NA	NA	NA	NA	NA	NA	G	C	G	C	C	C	G	G	G	G	C	G	G	C	C	G	G	C	G	G	G	G	G	G	G	G	C	C	G	G	G	G	G	G	C	G	G	G	C
AX-95246613	T/C	1A	512656499	+	NA	NA	NA	NA	NA	NA	T	C	T	T	C	C	T	T	T	T	T	T	T	T	T	T	T	T	T	T	T	T	T	T	T	T	T	T	T	T	T	C	T	T	T	T	T	T	C
AX-110941113	G/A	1A	512871804	+	NA	NA	NA	NA	NA	NA	G	A	G	A	A	A	G	G	G	G	N	G	G	A	A	G	G	A	G	G	G	G	G	G	G	G	A	A	G	G	G	G	G	G	A	G	G	G	A
AX-94781106	T/A	1A	512878201	+	NA	NA	NA	NA	NA	NA	T	T	T	T	A	A	T	T	T	T	T	T	T	T	A	T	T	T	T	T	T	T	A	T	T	T	T	T	A	T	A	A	A	T	A	T	T	A	A
AX-108725314	T/C	1A	512943902	+	NA	NA	NA	NA	NA	NA	T	C	T	C	C	C	T	T	T	T	C	T	T	C	C	T	T	C	T	T	T	T	T	T	T	T	C	C	T	T	T	T	T	T	C	T	T	T	C
AX-111570601	T/C	1A	512945637	+	NA	NA	NA	NA	NA	NA	T	C	T	C	C	C	T	T	T	T	C	T	T	C	C	T	T	C	T	T	T	T	T	T	T	T	C	C	T	T	T	T	T	T	C	T	T	T	C
AX-111018634	A/G	1A	513008675	+	NA	NA	NA	NA	NA	NA	A	G	A	G	G	G	A	N	A	A	G	A	A	G	G	A	A	G	A	A	A	A	A	A	A	A	G	G	A	A	A	A	A	A	G	A	A	A	G
AX-110445831	T/C	1A	513111145	+	NA	NA	NA	NA	NA	NA	T	C	T	C	C	C	T	T	T	T	C	T	T	C	C	T	T	C	T	T	T	T	T	T	T	T	C	C	T	T	T	T	T	T	C	T	T	T	C
AX-111660411	C/T	1A	513157512	+	NA	NA	NA	NA	NA	NA	C	C	C	Y	Y	Y	C	C	C	C	Y	C	C	Y	T	C	C	Y	C	C	C	C	C	C	C	C	Y	Y	C	C	C	C	C	C	Y	C	C	C	Y
AX-109287966	T/C	1A	513263600	+	NA	NA	NA	NA	NA	NA	T	C	T	C	C	C	T	T	T	T	C	T	T	C	C	T	T	C	T	T	T	T	T	T	T	T	C	C	T	T	T	T	T	T	C	T	T	T	C
AX-109985412	C/T	1A	513362330	+	NA	NA	NA	NA	NA	NA	C	T	C	N	T	T	C	C	C	C	T	C	C	T	N	C	C	T	C	C	C	C	C	C	C	C	Y	Y	C	C	C	C	C	C	T	C	C	C	Y
AX-108822716	G/A	1A	513492880	+	NA	NA	NA	NA	NA	NA	G	A	G	A	A	A	G	G	G	G	A	G	G	A	A	G	G	A	G	G	G	G	G	G	G	G	A	A	G	G	G	G	G	G	A	G	G	G	A
AX-110634728	G/A	1A	513624126	+	NA	NA	NA	NA	NA	NA	G	G	G	G	G	G	G	G	G	G	G	G	G	G	G	G	G	G	G	G	G	G	G	G	G	G	G	G	G	G	G	G	G	G	G	G	G	G	G
AX-179559126	A/C	1A	513661860	+	NA	NA	NA	NA	NA	NA	A	C	A	C	C	C	A	A	A	A	A	A	A	A	A	A	A	C	A	A	A	A	A	A	A	A	C	A	A	A	A	A	A	A	A	A	A	A	C
AX-95631320	A/C	1A	513661860	+	NA	NA	NA	NA	NA	NA	A	C	A	C	C	C	A	A	A	A	A	A	A	A	A	A	A	C	A	A	A	A	A	A	A	A	C	A	A	A	A	A	A	A	A	A	A	A	C
AX-94673659	A/G	1A	513661916	+	NA	NA	NA	NA	NA	NA	A	A	A	A	A	A	A	A	A	A	A	A	A	G	A	A	A	G	A	A	A	A	A	A	A	A	A	G	A	A	G	A	G	A	A	A	A	A	A
AX-179476680	T/G	1A	513662051	+	NA	NA	NA	NA	NA	NA	T	T	T	G	G	G	T	G	T	T	T	T	G	T	G	T	T	T	T	T	T	T	G	T	G	T	T	T	G	T	G	G	G	T	G	T	T	G	G
AX-179559001	T/C	1A	513662375	+	NA	NA	NA	NA	NA	NA	T	C	T	C	C	C	T	T	T	T	T	T	T	T	T	T	T	C	T	T	T	T	T	T	T	T	C	T	T	T	T	T	T	T	T	T	T	T	C
AX-95631243	T/C	1A	513662375	+	NA	NA	NA	NA	NA	NA	T	C	T	C	C	C	T	T	T	T	T	T	T	T	T	T	T	C	T	T	T	T	T	T	T	T	C	T	T	T	T	T	T	T	T	T	T	T	C
AX-89565010	C/A	1A	513736149	+	NA	NA	NA	NA	NA	NA	C	C	C	C	C	C	C	C	C	C	A	C	C	A	A	C	C	C	C	C	C	C	C	C	C	C	C	A	C	C	C	C	C	C	A	C	C	C	C
AX-86172393	C/T	1A	513736378	+	NA	NA	NA	NA	NA	NA	C	C	C	C	C	C	C	C	C	C	T	C	C	T	T	C	C	C	C	C	C	C	C	C	C	C	C	T	C	C	C	C	C	C	T	C	C	C	C
AX-86172394	C/T	1A	513736378	+	NA	NA	NA	NA	NA	NA	C	C	C	C	C	C	C	C	C	C	T	C	C	T	T	C	C	C	C	C	C	C	C	C	C	C	C	T	C	C	C	C	C	C	T	C	C	C	C
AX-108774424	G/A	1A	513846418	+	NA	NA	NA	NA	NA	NA	G	G	G	G	G	G	G	G	G	G	A	G	G	A	A	G	G	G	G	G	G	G	G	G	G	G	G	A	G	G	G	G	G	G	A	G	G	G	G
AX-109353821	C/A	1A	513882961	+	NA	NA	NA	NA	NA	NA	C	C	C	C	C	C	C	C	C	C	A	C	C	A	A	C	C	C	C	C	C	C	C	C	C	C	C	A	C	C	C	C	C	C	A	C	C	C	C
AX-110472117	C/T	1A	513891718	+	NA	NA	NA	NA	NA	NA	C	C	C	C	C	C	C	C	C	C	T	C	C	T	T	C	C	C	C	C	C	C	C	C	C	C	C	T	C	C	C	C	C	C	T	C	C	C	C
AX-95682582	C/T	1A	513891718	+	NA	NA	NA	NA	NA	NA	C	C	C	C	C	C	C	C	C	C	T	C	C	T	T	C	C	C	C	C	C	C	C	C	C	C	C	T	C	C	C	C	C	C	T	C	C	C	C
AX-86162915	T/C	1A	513893348	+	NA	NA	NA	NA	NA	NA	T	T	T	T	T	T	T	T	T	T	C	T	T	C	C	T	T	T	T	T	T	T	T	T	T	T	T	C	T	T	T	T	T	T	C	T	T	T	T
AX-86162916	T/C	1A	513893348	+	NA	NA	NA	NA	NA	NA	T	T	T	T	T	T	T	T	T	T	C	T	T	C	Y	T	T	T	T	T	T	T	T	T	T	T	T	C	T	T	T	T	T	T	Y	T	T	T	T
AX-112291221	A/C	1A	513894012	+	NA	NA	NA	NA	NA	NA	A	A	A	A	A	A	A	A	A	A	C	A	A	C	C	A	A	A	A	A	A	A	A	A	A	A	A	C	A	A	A	A	A	A	C	A	A	A	A
AX-95634448	A/C	1A	513894012	+	NA	NA	NA	NA	NA	NA	A	A	A	A	A	A	A	A	A	A	C	A	A	C	C	A	A	A	A	A	A	A	A	A	A	A	A	C	A	A	A	A	A	A	C	A	A	A	A
AX-94535560	G/A	1A	513933908	+	NA	NA	NA	NA	NA	NA	G	G	G	G	G	G	G	G	G	G	A	G	G	A	A	G	G	G	G	G	G	G	G	G	G	G	G	A	G	G	G	G	G	G	A	G	G	G	G
AX-109514069	G/A	1A	514031260	+	NA	NA	NA	NA	NA	NA	G	G	G	G	G	G	G	G	G	G	A	G	G	A	A	G	G	G	G	G	G	G	G	G	G	G	G	A	G	G	G	G	G	G	A	G	G	G	G
AX-110421859	A/C	1A	514035105	+	NA	NA	NA	NA	NA	NA	A	A	A	A	A	A	A	A	A	A	C	A	A	C	C	A	A	A	A	A	A	A	A	A	A	A	M	C	A	A	A	A	A	A	C	A	A	A	A
AX-108943298	T/C	1A	514055942	+	NA	NA	NA	NA	NA	NA	T	T	T	T	T	T	T	T	T	T	C	T	T	C	C	T	T	T	T	T	T	T	T	T	T	T	T	C	T	T	T	T	T	T	C	T	T	T	T
AX-111778628	G/C	1A	514097919	+	NA	NA	NA	NA	NA	NA	G	G	G	G	G	G	G	G	G	G	C	G	G	N	C	G	G	G	G	G	G	G	G	G	G	G	G	C	G	G	G	G	G	G	C	G	G	G	G
AX-112290296	T/C	1A	514135823	+	NA	NA	NA	NA	NA	NA	T	T	T	T	T	T	T	T	T	T	C	T	T	C	C	T	T	T	T	T	T	T	T	T	T	T	T	C	T	T	T	T	T	T	C	T	T	T	T
AX-95683840	T/C	1A	514135823	+	NA	NA	NA	NA	NA	NA	T	T	T	T	T	T	T	T	T	T	C	T	T	C	C	T	T	T	T	T	T	T	T	T	T	T	T	C	T	T	T	T	T	T	C	T	T	T	T
AX-95679376	T/C	1A	514137547	+	NA	NA	NA	NA	NA	NA	T	T	T	T	T	T	T	T	T	T	C	T	T	C	C	T	T	T	T	T	T	T	T	T	T	T	T	C	T	T	T	T	T	T	C	T	T	T	T
AX-110056091	C/A	1A	514137720	+	NA	NA	NA	NA	NA	NA	C	C	C	C	C	C	C	C	C	C	A	C	C	A	A	C	C	C	C	C	C	C	C	C	C	C	C	A	C	C	C	C	C	C	A	C	C	C	C
AX-95651999	C/A	1A	514137720	+	NA	NA	NA	NA	NA	NA	C	C	C	C	C	C	C	C	C	C	A	C	C	A	A	C	C	C	C	C	C	C	C	C	C	C	C	A	C	C	C	C	C	C	A	C	C	C	C
AX-95229645	A/G	1A	514137878	+	NA	NA	NA	NA	NA	NA	G	A	G	A	A	A	G	A	A	A	A	A	A	A	A	A	A	A	A	A	A	A	A	A	A	A	A	A	A	A	A	A	A	A	G	A	A	G	A
AX-110515890	A/G	1A	514217873	+	NA	NA	NA	NA	NA	NA	A	A	A	A	A	A	A	A	A	A	G	A	A	G	G	A	A	A	A	A	A	A	A	A	A	A	A	G	A	A	A	A	A	A	G	A	A	A	A
AX-110024986	G/T	1A	514252445	+	NA	NA	NA	NA	NA	NA	G	G	G	G	G	G	G	G	G	G	T	G	G	T	T	G	G	G	G	G	G	G	G	G	G	G	G	T	G	G	G	G	G	G	T	G	G	G	G
AX-86167354	C/T	1A	514691876	+	NA	NA	NA	NA	NA	NA	T	T	T	C	C	C	T	C	C	T	T	T	C	T	C	T	C	T	C	C	C	C	C	C	T	C	C	T	C	C	C	T	C	C	C	C	C	C	C
AX-108939856	G/T	1A	515473266	+	NA	NA	NA	NA	NA	NA	G	G	G	G	G	G	G	G	G	G	T	G	G	T	T	G	G	G	G	G	G	G	G	G	G	G	G	T	G	G	G	G	G	G	T	G	G	G	G
AX-179560291	T/G	1A	515553365	+	NA	NA	NA	NA	NA	NA	T	T	T	T	T	T	T	T	T	T	G	T	T	G	G	T	T	T	T	T	T	T	T	T	T	T	T	G	T	T	T	T	T	T	G	T	T	T	T
AX-89692151	C/T	1A	515770091	+	NA	NA	NA	NA	NA	NA	C	C	C	C	C	C	C	C	C	C	T	C	C	T	T	C	C	C	C	C	C	C	C	C	C	C	C	T	C	C	C	C	C	C	T	C	C	C	C
AX-110561396	C/A	1A	515770877	+	NA	NA	NA	NA	NA	NA	C	C	C	C	C	C	C	C	C	C	A	C	C	A	A	C	C	C	C	C	C	C	C	C	C	C	C	A	C	C	C	C	C	C	A	C	C	C	C
AX-109926272	A/G	1A	515860210	+	NA	NA	NA	NA	NA	NA	A	A	A	A	A	A	A	A	A	A	G	A	A	G	G	A	A	A	A	A	A	A	A	A	A	A	A	G	A	A	A	A	A	A	G	A	A	A	A
AX-108938054	C/T	1A	516069204	+	NA	NA	NA	NA	NA	NA	C	C	C	C	C	C	C	C	C	C	T	C	C	T	T	C	C	C	C	C	C	C	C	C	C	C	C	T	C	C	C	C	C	C	T	C	C	C	C
AX-109312216	A/G	1A	516154746	+	NA	NA	NA	NA	NA	NA	A	A	A	A	A	A	A	A	A	A	G	A	A	G	G	A	A	A	A	A	A	A	A	A	A	A	A	G	A	A	A	A	A	A	G	A	A	A	A
AX-112286541	G/A	1A	516373227	+	NA	NA	NA	NA	NA	NA	G	G	G	G	G	G	G	G	G	G	A	G	G	A	A	G	G	G	G	G	G	G	G	G	G	G	G	A	G	G	G	G	G	G	A	G	G	G	G
AX-109446453	T/C	1A	516563559	+	NA	NA	NA	NA	NA	NA	T	T	T	T	T	T	T	T	T	T	C	T	T	C	C	T	T	T	T	T	T	T	T	T	T	T	T	C	T	T	T	T	T	T	C	T	T	T	T
AX-94668573	T/C	1A	516563922	+	NA	NA	NA	NA	NA	NA	T	C	T	T	C	C	C	T	T	T	T	C	T	T	T	T	T	T	C	C	C	C	T	N	C	T	T	T	T	T	N	T	T	T	T	T	T	T	C
AX-95630468	T/C	1A	516563922	+	NA	NA	NA	NA	NA	NA	T	C	T	T	C	C	C	T	T	T	T	C	T	T	T	T	T	T	C	N	N	C	T	T	C	T	T	T	T	T	T	T	T	T	T	T	T	T	C
AX-94624955	C/T	1A	516564136	+	NA	NA	NA	NA	NA	NA	C	C	C	C	C	C	C	C	N	C	T	C	C	T	T	C	C	C	C	C	C	C	C	N	C	C	C	T	N	C	C	T	C	C	T	C	C	C	C
AX-110622902	G/A	1A	516564299	+	NA	NA	NA	NA	NA	NA	G	G	G	G	G	G	G	G	G	G	A	G	G	A	A	G	G	G	G	G	G	G	G	G	G	G	G	A	G	G	G	G	G	G	A	G	G	G	G
AX-109829299	T/C	1A	516569008	+	NA	NA	NA	NA	NA	NA	T	T	T	T	T	T	T	T	T	T	C	T	T	C	C	T	T	T	T	T	T	T	T	T	T	T	T	C	T	T	T	T	T	T	C	T	T	T	T
AX-108867207	A/T	1A	516570670	+	NA	NA	NA	NA	NA	NA	A	A	A	A	A	A	N	A	A	A	T	A	A	T	T	A	A	A	A	A	A	A	A	A	A	A	A	T	A	A	A	A	A	A	T	A	A	A	A
AX-110569333	C/T	1A	516576219	+	NA	NA	NA	NA	NA	NA	C	C	C	C	C	C	C	C	C	C	T	C	C	T	T	C	C	C	C	C	C	C	C	C	C	C	C	T	C	C	C	C	C	C	T	C	C	C	C
AX-108777476	A/G	1A	517095841	+	NA	NA	NA	NA	NA	NA	A	G	A	A	G	G	G	A	A	A	A	G	A	A	A	A	A	A	G	G	G	G	A	A	G	A	A	A	A	A	A	G	A	A	A	A	A	A	G
AX-109935443	G/A	1A	517374519	+	NA	NA	NA	NA	NA	NA	G	A	G	G	A	A	A	G	G	G	G	A	G	G	G	G	G	G	A	A	A	A	G	G	A	G	G	G	G	G	G	A	G	G	G	G	G	G	A
AX-94583358	C/T	1A	517381090	+	NA	NA	NA	NA	NA	NA	T	T	C	C	C	C	C	C	C	N	T	T	C	C	C	T	C	C	C	N	C	C	C	C	N	C	C	C	C	C	C	C	C	C	C	C	N	C	C
AX-110576513	C/T	1A	517393046	+	NA	NA	NA	NA	NA	NA	C	T	C	C	T	T	T	C	C	N	C	T	C	C	C	C	C	C	T	T	T	T	C	C	T	C	C	C	C	C	C	T	C	C	C	C	C	C	T
AX-108768356	T/G	1A	517394449	+	NA	NA	NA	NA	NA	NA	T	G	T	T	G	G	G	T	T	T	T	G	T	T	T	T	T	T	G	G	G	G	T	T	G	T	T	T	T	T	T	G	T	T	T	T	T	T	G
AX-111159498	A/T	1A	517402323	+	NA	NA	NA	NA	NA	NA	A	T	A	A	T	T	T	A	A	A	A	T	A	A	A	A	A	A	T	T	T	T	A	A	T	A	A	A	A	A	A	T	A	A	A	A	A	A	T
AX-94964616	C/T	1A	517415388	+	NA	NA	NA	NA	NA	NA	C	C	C	C	C	C	C	C	C	C	T	C	C	T	T	C	C	C	C	C	C	C	C	C	C	C	C	T	C	C	C	C	C	C	T	C	C	C	C
AX-179558199	C/T	1A	517481253	+	NA	NA	NA	NA	NA	NA	T	C	C	C	C	C	C	C	C	T	T	C	C	T	T	T	T	T	C	C	C	C	C	T	C	T	C	T	C	C	C	C	C	C	T	T	T	C	C
AX-95630765	C/T	1A	517481253	+	NA	NA	NA	NA	NA	NA	T	C	C	C	C	C	C	C	C	T	T	C	C	T	T	T	T	T	C	C	C	C	C	T	C	T	C	T	C	C	C	C	C	C	T	T	T	C	C
AX-179559752	G/A	1A	517482507	+	NA	NA	NA	NA	NA	NA	G	G	G	G	G	G	G	G	G	G	A	G	G	A	A	G	G	G	G	G	G	G	G	G	G	G	G	A	G	G	G	G	G	G	A	G	G	G	G
AX-94423125	G/A	1A	517482507	+	NA	NA	NA	NA	NA	NA	G	G	G	G	G	G	G	G	G	G	A	G	G	A	A	G	G	G	G	G	G	G	G	G	G	G	G	A	G	G	G	G	G	G	A	G	G	G	G
AX-94437971	C/T	1A	517482818	+	NA	NA	NA	NA	NA	NA	C	C	C	C	C	C	C	C	C	C	T	C	C	T	T	C	C	C	C	C	C	C	C	C	C	C	C	T	C	C	C	C	C	C	T	C	C	C	C
AX-95207652	T/C	1A	517488082	+	NA	NA	NA	NA	NA	NA	Y	T	T	T	T	T	T	T	T	Y	C	T	T	C	C	Y	Y	Y	T	T	T	T	T	Y	T	Y	T	C	T	T	T	T	T	T	C	Y	Y	T	T
AX-179558200	C/T	1A	517488745	+	NA	NA	NA	NA	NA	NA	Y	C	C	C	C	C	C	C	C	Y	T	C	C	T	T	Y	Y	Y	C	C	C	C	C	Y	C	Y	C	T	C	C	C	C	C	C	T	Y	Y	C	C
AX-95659332	G/A	1A	517489581	+	NA	NA	NA	NA	NA	NA	R	G	G	G	G	G	G	G	G	R	A	G	G	A	A	R	R	R	G	G	G	G	G	R	G	R	G	A	G	G	G	G	G	G	A	R	R	G	G
AX-111498332	T/C	1A	517514083	+	NA	NA	NA	NA	NA	NA	C	T	T	T	T	T	T	T	T	C	C	T	T	C	C	C	C	C	T	T	T	T	T	C	T	C	T	C	T	T	T	T	T	T	C	C	C	T	T
AX-94634012	T/C	1A	517517047	+	NA	NA	NA	NA	NA	NA	C	T	C	C	T	T	C	T	T	C	T	T	T	T	C	T	T	T	C	C	T	T	C	C	Y	T	T	T	T	T	T	T	T	T	T	T	T	C	T
AX-179477148	C/T	1A	517895050	+	NA	NA	NA	NA	NA	NA	C	C	C	C	C	C	C	C	C	C	T	C	C	T	T	C	C	C	C	C	C	C	C	C	C	C	C	T	C	C	C	C	C	C	T	C	C	C	C
AX-109485793	G/T	1A	520412991	+	NA	NA	NA	NA	NA	NA	G	G	G	G	G	G	G	G	G	G	T	G	G	T	G	G	G	G	G	G	G	G	G	G	G	G	G	T	G	G	G	G	G	G	G	G	G	G	T
AX-110514574	G/T	1A	520530721	+	NA	NA	NA	NA	NA	NA	G	G	G	G	G	G	G	G	G	G	T	G	G	T	G	G	G	G	G	G	G	G	G	G	G	G	G	T	G	G	G	T	G	G	G	G	G	G	G
AX-108929920	T/C	1A	520550346	+	NA	NA	NA	NA	NA	NA	T	T	T	T	T	T	T	T	T	T	C	T	T	C	T	T	T	T	T	T	T	T	T	T	T	T	T	C	T	T	T	C	T	T	T	T	T	T	T
AX-111509527	T/G	1A	520564072	+	NA	NA	NA	NA	NA	NA	T	T	T	T	T	T	T	T	T	T	G	T	T	G	T	T	T	T	T	T	T	T	T	T	T	T	T	G	T	T	T	G	T	T	T	T	T	T	T
AX-108819000	T/C	1A	520564440	+	NA	NA	NA	NA	NA	NA	T	T	T	T	T	T	T	T	T	T	C	T	T	C	T	T	T	T	T	T	T	T	T	T	T	T	T	C	T	T	T	C	T	T	T	T	T	T	T
AX-89521712	T/C	1A	520573048	+	NA	NA	NA	NA	NA	NA	T	C	T	T	C	C	T	T	T	T	T	T	T	T	T	T	T	T	T	T	T	T	T	T	T	T	T	T	T	T	T	T	T	T	T	T	T	T	C
AX-112288600	T/C	1A	520579865	+	NA	NA	NA	NA	NA	NA	T	T	T	T	T	T	T	T	T	T	Y	T	T	Y	T	T	T	T	T	T	T	T	T	T	T	T	T	Y	T	T	T	Y	T	T	T	T	T	T	T
AX-179558292	T/C	1A	520579865	+	NA	NA	NA	NA	NA	NA	T	T	T	T	T	T	T	T	T	T	C	T	T	C	T	T	T	T	T	T	T	T	T	T	T	T	T	C	T	T	T	C	T	T	T	T	T	T	T
AX-111023601	T/C	1A	520583604	+	NA	NA	NA	NA	NA	NA	T	T	T	T	T	T	T	T	T	T	C	T	T	C	T	T	T	T	T	T	T	T	T	T	T	T	T	C	T	T	T	C	T	T	T	T	T	T	T
AX-94508777	C/T	1A	520583780	+	NA	NA	NA	NA	NA	NA	C	C	C	C	C	C	C	C	C	C	T	C	C	T	C	C	C	C	C	C	C	C	C	C	C	C	C	T	C	C	C	T	C	C	C	C	C	C	C
AX-109300073	G/A	1A	520777265	+	NA	NA	NA	NA	NA	NA	G	G	G	G	G	G	A	G	G	G	G	A	G	G	A	G	G	G	A	A	A	A	G	G	A	G	G	G	G	G	G	G	G	G	A	G	G	G	G
AX-111595835	T/C	1A	520785464	+	NA	NA	NA	NA	NA	NA	T	C	T	T	C	C	T	T	T	T	C	T	T	C	T	T	T	T	T	T	T	T	T	T	T	T	T	N	T	T	T	C	T	T	T	T	T	T	C
AX-179475403	T/C	1A	521279250	+	NA	NA	NA	NA	NA	NA	T	T	T	T	T	T	T	T	T	T	T	T	T	T	T	T	T	T	T	T	T	T	T	T	T	T	T	T	T	T	T	C	T	T	T	T	T	T	C
AX-179557365	T/C	1A	521279250	+	NA	NA	NA	NA	NA	NA	T	T	T	T	T	T	T	T	T	T	T	T	T	T	T	T	T	T	T	T	T	T	T	T	T	T	T	T	T	T	T	N	T	T	T	T	T	T	C
AX-94426657	A/G	1A	521323271	+	NA	NA	NA	NA	NA	NA	A	A	A	A	A	A	A	A	A	A	A	A	A	A	A	A	A	A	A	A	A	A	A	A	A	A	A	A	A	A	A	G	A	A	A	A	A	A	G
AX-94412484	G/C	1A	521338349	+	NA	NA	NA	NA	NA	NA	G	G	G	G	C	C	G	G	G	G	G	G	G	G	C	G	G	G	G	G	G	G	N	G	G	G	G	G	C	G	N	C	C	G	C	G	G	G	C
AX-86162289	G/A	1A	521339698	+	NA	NA	NA	NA	NA	NA	G	G	G	G	G	G	G	G	G	G	G	G	G	G	G	G	G	G	G	G	G	G	G	G	G	G	G	G	G	G	G	A	G	G	G	G	G	G	A
AX-109458415	T/C	1A	521984375	+	NA	NA	NA	NA	NA	NA	T	T	T	T	T	T	T	T	T	T	T	T	T	T	T	T	T	T	T	T	T	T	T	T	T	T	T	T	T	T	T	C	T	T	T	T	T	T	C
AX-94813248	C/A	1A	522191108	+	NA	NA	NA	NA	NA	NA	C	C	C	C	C	C	C	C	A	C	C	C	C	A	C	C	C	A	C	C	C	C	C	C	C	C	A	C	C	C	A	C	C	C	A	A	A	C	C
AX-110394578	C/T	1A	522239093	+	NA	NA	NA	NA	NA	NA	C	C	C	C	C	C	C	C	C	C	C	C	C	C	C	C	C	C	C	C	C	C	C	C	C	C	C	C	C	C	C	T	C	C	C	C	C	C	T
AX-111463705	G/A	1A	522245833	+	NA	NA	NA	NA	NA	NA	G	G	G	G	G	G	G	G	G	G	G	G	G	G	G	G	G	G	G	G	G	G	G	G	G	G	G	G	G	G	G	A	G	G	G	G	G	G	A
AX-111691603	T/C	1A	522460286	+	NA	NA	NA	NA	NA	NA	T	T	T	T	T	T	T	T	T	T	T	T	T	T	T	T	T	T	T	T	T	T	T	T	T	T	T	T	T	T	T	C	T	T	T	T	T	T	C
AX-94423414	C/T	1A	522500993	+	NA	NA	NA	NA	NA	NA	C	C	C	C	C	C	C	C	C	C	C	C	C	C	C	C	C	C	C	C	C	C	C	C	C	C	C	C	C	C	C	T	C	C	C	C	C	C	T
AX-95630058	C/T	1A	522500993	+	NA	NA	NA	NA	NA	NA	C	C	C	C	C	C	C	C	C	C	C	C	C	C	C	C	C	C	C	C	C	C	C	C	C	C	C	C	C	C	C	T	C	C	C	C	C	C	T
AX-179557642	A/C	1A	522501028	+	NA	NA	NA	NA	NA	NA	A	A	A	A	A	A	A	A	A	A	A	A	A	A	A	A	A	A	A	A	A	A	A	A	A	A	A	A	A	A	A	N	A	A	A	A	A	A	C
AX-94520804	A/C	1A	522501028	+	NA	NA	NA	NA	NA	NA	A	A	A	A	A	A	A	A	A	A	A	A	A	A	A	A	A	A	A	A	A	A	A	A	A	A	A	A	A	A	A	C	A	A	A	A	A	A	C
AX-94403165	G/C	1A	522520059	+	NA	NA	NA	NA	NA	NA	C	C	G	G	G	G	G	G	G	C	C	C	G	G	G	C	G	G	G	G	G	G	G	G	G	G	G	G	G	G	G	G	G	G	G	G	G	C	G
AX-109286062	G/A	1A	522880220	+	NA	NA	NA	NA	NA	NA	A	A	G	G	G	G	G	G	G	A	A	A	G	G	G	A	G	G	G	G	G	G	G	G	G	G	G	G	G	G	G	G	G	G	G	G	G	A	G
AX-111761395	T/C	1A	522915087	+	NA	NA	NA	NA	NA	NA	T	T	T	T	T	T	T	T	T	T	T	T	T	T	T	T	T	T	T	T	T	T	T	T	T	T	T	T	T	T	T	C	T	T	T	T	T	T	C
AX-110393779	C/A	1A	522916025	+	NA	NA	NA	NA	NA	NA	C	C	C	C	C	C	C	C	C	C	C	C	C	C	C	C	C	C	C	C	C	C	C	C	C	C	C	C	C	C	C	A	C	C	C	C	C	C	A
AX-95137011	A/C	1A	522980571	+	NA	NA	NA	NA	NA	NA	A	A	A	A	A	A	A	A	A	A	A	A	A	A	A	A	A	A	A	A	A	A	A	A	A	A	A	A	A	A	A	C	A	A	A	A	A	A	C
AX-86172290	C/A	1A	527178181	+	NA	NA	NA	NA	NA	NA	C	C	C	C	C	C	C	C	C	C	A	C	C	A	C	C	C	C	C	C	C	C	C	C	C	C	C	A	C	C	C	C	C	C	C	C	C	C	C
AX-111702009	A/T	1A	527392930	+	NA	NA	NA	NA	NA	NA	A	A	A	A	A	A	A	A	A	A	A	A	A	A	A	A	A	A	A	A	A	A	A	A	A	A	A	A	A	A	A	T	A	A	A	A	A	A	T
AX-109435199	T/C	1A	527915495	+	NA	NA	NA	NA	NA	NA	T	T	T	T	T	T	T	T	T	T	T	T	T	T	T	T	T	T	T	T	T	T	T	T	T	T	T	T	T	T	T	C	T	T	T	T	T	T	C
AX-109829869	G/T	1A	527916205	+	NA	NA	NA	NA	NA	NA	G	G	G	G	G	G	G	G	G	G	G	G	G	G	G	G	G	G	G	G	G	G	G	G	G	G	G	G	G	G	G	T	G	G	G	G	G	G	T
AX-110434499	T/C	1A	527917447	+	NA	NA	NA	NA	NA	NA	N	T	T	T	T	T	T	T	T	T	T	T	T	T	T	T	T	T	T	T	T	T	T	T	T	T	T	T	T	T	T	C	T	T	T	T	T	T	N
AX-86175236	T/C	1A	527952067	+	NA	NA	NA	NA	NA	NA	T	T	T	T	T	T	T	T	T	T	T	T	T	T	T	T	T	T	T	T	T	T	T	T	T	T	T	T	T	T	T	C	T	T	T	T	T	T	C
AX-95146951	A/G	1A	527955382	+	NA	NA	NA	NA	NA	NA	A	A	A	A	A	A	A	A	A	A	A	A	A	A	A	A	A	A	A	A	A	A	A	A	A	A	A	A	A	A	A	G	A	A	A	A	A	A	G
AX-109332434	G/A	1A	527955839	+	NA	NA	NA	NA	NA	NA	G	G	G	G	G	G	G	G	G	G	G	G	G	G	G	G	G	G	G	G	G	G	G	G	G	G	G	G	G	G	G	A	G	G	G	G	G	G	A
AX-109821613	C/T	1A	528060248	+	NA	NA	NA	NA	NA	NA	C	C	C	C	C	C	C	C	C	C	C	C	C	C	C	C	C	C	C	C	C	C	C	C	C	C	C	C	C	C	C	T	C	C	C	C	C	C	T
AX-108806669	T/C	1A	528278079	+	NA	NA	NA	NA	NA	NA	N	T	T	N	T	T	T	T	T	T	T	T	T	T	T	T	T	T	T	T	T	T	T	T	T	T	T	T	T	T	T	C	T	T	T	T	T	T	C
AX-109515934	T/A	1A	528439812	+	NA	NA	NA	NA	NA	NA	T	T	T	T	T	T	T	T	T	T	T	T	T	T	T	T	T	T	T	T	T	T	T	T	T	T	T	T	T	T	T	A	T	T	T	T	T	T	A
AX-109305605	T/C	1A	528547150	+	NA	NA	NA	NA	NA	NA	T	T	T	T	T	T	T	T	T	T	T	T	T	T	T	T	T	T	T	T	T	T	T	T	T	T	T	T	T	T	T	C	T	T	T	T	T	T	C
AX-108843084	A/G	1A	528636645	+	NA	NA	NA	NA	NA	NA	A	A	A	A	A	A	A	A	A	A	A	A	A	A	A	A	A	A	A	A	A	A	A	A	A	A	A	A	A	A	A	G	A	A	A	A	A	A	G
AX-110065160	G/A	1A	528639286	+	NA	NA	NA	NA	NA	NA	G	G	G	G	G	G	G	G	G	G	G	G	G	G	G	G	G	G	G	G	G	G	G	G	G	G	G	G	G	G	G	A	G	G	G	G	G	G	A
AX-95260861	G/T	1A	528665754	+	NA	NA	NA	NA	NA	NA	T	G	T	G	G	G	T	G	G	G	G	G	G	G	G	G	G	G	G	G	G	G	G	G	G	G	G	G	G	G	N	G	G	G	G	G	G	G	G
AX-110023564	T/C	1A	528973058	+	NA	NA	NA	NA	NA	NA	T	T	T	T	T	T	T	T	T	T	T	T	T	T	T	T	T	T	T	T	T	T	T	T	T	T	T	T	T	T	T	C	T	T	T	T	T	T	C
AX-111675005	A/G	1A	529198128	+	NA	NA	NA	NA	NA	NA	A	A	A	A	A	A	A	A	A	A	A	A	A	A	A	A	A	A	A	A	A	A	A	A	A	A	A	A	A	A	A	G	A	A	A	A	A	A	G
AX-111372824	A/C	1A	529668998	+	NA	NA	NA	NA	NA	NA	M	A	M	A	A	A	M	A	A	A	A	A	A	A	A	A	A	A	A	A	A	A	A	A	A	A	A	A	A	A	A	A	A	A	A	A	A	A	A
AX-179561737	A/C	1A	529668998	+	NA	NA	NA	NA	NA	NA	M	A	M	A	A	A	M	A	A	A	A	A	A	A	A	A	A	A	A	A	A	A	A	A	N	A	A	A	A	A	A	A	A	A	A	A	A	A	A
AX-178066332	C/T	1A	529788828	+	NA	NA	NA	NA	NA	NA	C	C	C	C	C	C	C	C	C	C	T	C	C	T	C	C	C	C	C	C	C	C	C	C	C	C	C	T	C	C	C	T	C	C	C	C	C	C	T
AX-94492604	C/T	1A	529788828	+	NA	NA	NA	NA	NA	NA	C	C	C	C	C	C	C	C	C	C	T	C	C	T	C	C	C	C	C	C	C	C	C	C	C	C	C	T	C	C	C	T	C	C	C	C	C	C	T
AX-179475480	T/G	1A	530173432	+	NA	NA	NA	NA	NA	NA	T	T	T	T	T	T	T	T	T	T	G	T	T	G	T	T	T	T	T	T	T	T	T	T	T	T	T	G	T	T	T	G	T	T	T	T	T	T	G
AX-94960090	T/G	1A	530173432	+	NA	NA	NA	NA	NA	NA	T	T	T	T	T	T	T	T	T	T	G	T	T	G	T	T	T	T	T	T	T	T	T	T	T	T	T	G	T	T	T	G	T	T	T	T	T	T	G
AX-109900099	A/C	1A	530177169	+	NA	NA	NA	NA	NA	NA	A	A	A	A	A	A	A	A	A	A	C	A	A	C	A	A	A	A	A	A	A	A	A	A	A	A	A	C	A	A	A	C	A	A	A	A	A	A	C
AX-94504454	G/T	1A	530203418	+	NA	NA	NA	NA	NA	NA	G	G	G	G	G	G	G	G	G	G	T	G	G	T	G	G	G	G	G	G	G	G	G	G	G	G	G	T	G	G	G	T	G	G	G	G	G	G	T
AX-109985768	T/C	1A	530204102	+	NA	NA	NA	NA	NA	NA	T	T	T	T	T	T	T	T	T	T	C	T	T	C	T	T	T	T	T	T	T	T	T	T	T	T	T	C	T	T	T	C	T	T	T	T	T	T	C
AX-179559485	T/C	1A	530204102	+	NA	NA	NA	NA	NA	NA	T	T	T	T	T	T	T	T	T	T	C	T	T	C	T	T	T	T	T	T	T	T	T	T	T	T	T	C	T	T	T	C	T	T	T	T	T	T	C
AX-111497715	C/T	1A	530210139	+	NA	NA	NA	NA	NA	NA	C	C	C	C	C	C	C	C	C	C	T	C	C	T	C	C	C	C	C	C	C	C	C	C	C	C	C	T	C	C	C	T	C	C	C	C	C	C	T
AX-86174196	C/T	1A	530211906	+	NA	NA	NA	NA	NA	NA	C	C	C	C	C	C	C	C	C	C	T	C	C	T	C	C	C	C	C	C	C	C	C	C	C	C	C	T	C	C	C	T	C	C	C	C	C	C	T
AX-108831990	A/G	1A	530214995	+	NA	NA	NA	NA	NA	NA	A	A	A	A	A	A	A	A	A	A	G	A	A	G	R	A	A	A	A	A	A	A	A	A	A	A	A	G	A	A	A	G	A	A	A	A	A	A	G
AX-86176249	C/T	1A	530232680	+	NA	NA	NA	NA	NA	NA	C	C	C	C	C	C	C	C	C	C	Y	C	C	Y	C	C	C	C	C	C	C	C	C	C	C	C	C	Y	C	C	C	Y	C	C	C	C	C	C	Y
AX-95684431	T/C	1A	530236430	+	NA	NA	NA	NA	NA	NA	T	T	T	T	T	T	T	T	T	T	C	T	T	C	T	T	T	T	T	T	T	T	T	T	T	T	T	C	T	T	T	C	T	T	T	T	T	T	C
AX-110968221	T/C	1A	530705021	+	NA	NA	NA	NA	NA	NA	T	T	T	T	T	T	T	T	T	T	T	T	C	C	T	T	T	C	T	T	T	T	T	T	T	T	T	T	T	T	T	T	T	T	T	T	T	T	T
AX-179558650	A/G	1A	531605234	+	NA	NA	NA	NA	NA	NA	A	A	A	A	A	A	A	A	A	A	G	A	A	G	A	A	A	A	A	A	A	A	A	A	A	A	A	G	A	A	A	G	A	A	A	A	A	A	G
AX-89467957	A/G	1A	531605234	+	NA	NA	NA	NA	NA	NA	A	A	A	A	R	A	A	A	A	A	G	A	A	G	A	A	A	A	A	A	A	A	A	A	A	A	A	G	A	A	A	G	A	A	A	A	A	A	G
AX-86169382	C/T	1A	531643079	+	NA	NA	NA	NA	NA	NA	C	C	C	C	C	C	C	C	C	C	C	C	C	C	C	C	C	C	C	C	C	C	C	C	C	C	C	C	C	C	C	T	N	C	C	C	C	C	T
AX-86169383	C/T	1A	531643079	+	NA	NA	NA	NA	NA	NA	C	C	C	C	C	C	C	C	C	C	C	C	C	C	C	C	C	C	C	C	C	C	C	C	C	C	C	C	C	C	C	T	C	C	C	C	C	C	T
AX-179389358	G/A	1A	531684833	+	NA	NA	NA	NA	NA	NA	A	G	A	A	G	G	A	G	A	A	G	G	G	A	G	A	A	A	A	A	A	G	G	G	A	G	G	G	G	G	A	A	G	G	A	A	G	A	G
AX-95653474	G/A	1A	531684833	+	NA	NA	NA	NA	NA	NA	A	G	A	A	G	G	A	G	A	A	G	G	G	A	G	A	A	A	A	A	A	G	G	G	A	G	G	G	G	G	A	A	G	G	A	A	G	A	G
AX-109314207	A/G	1A	531872939	+	NA	NA	NA	NA	NA	NA	A	A	A	A	A	A	G	A	A	A	G	A	G	G	A	A	G	A	G	G	G	G	A	G	G	A	A	G	A	A	A	A	A	A	A	G	G	A	A
AX-110909710	T/C	1A	532262512	+	NA	NA	NA	NA	NA	NA	T	T	T	T	T	T	T	T	T	T	T	T	T	T	N	T	T	T	T	T	T	T	N	T	T	T	T	T	T	T	T	C	N	T	N	T	T	T	T
AX-94974179	T/C	1A	532440067	+	NA	NA	NA	NA	NA	NA	T	T	T	T	T	T	T	T	T	T	T	T	T	T	C	T	T	T	T	T	T	T	C	T	T	T	T	T	T	T	T	C	C	T	C	T	T	T	T
AX-89645960	G/A	1A	532744307	+	NA	NA	NA	NA	NA	NA	G	G	G	G	G	G	A	G	G	G	A	G	A	A	G	G	A	G	A	A	A	A	G	A	A	G	G	A	G	G	G	A	G	G	G	A	A	G	A
AX-108844201	C/A	1A	532771249	+	NA	NA	NA	NA	NA	NA	C	C	A	N	C	C	C	C	C	A	C	A	C	C	A	A	C	C	C	C	C	C	A	C	C	C	C	C	A	A	C	C	A	A	A	C	C	A	C
AX-94440483	A/T	1A	532815403	+	NA	NA	NA	NA	NA	NA	A	A	A	A	A	A	T	A	A	A	T	A	T	T	A	A	T	A	T	T	T	T	A	T	T	A	A	T	A	A	A	A	A	A	A	T	T	A	A
AX-179475896	C/T	1A	532816179	+	NA	NA	NA	NA	NA	NA	C	C	C	C	C	C	N	C	C	C	T	C	T	T	C	C	T	C	T	T	T	T	C	T	T	C	C	T	C	C	C	C	C	C	C	T	T	C	C
AX-94972237	C/T	1A	532816179	+	NA	NA	NA	NA	NA	NA	C	C	C	C	C	C	T	C	C	C	T	C	T	T	C	C	T	C	T	T	T	T	C	T	T	C	C	T	C	C	C	C	C	C	C	T	T	C	C
AX-95679746	C/T	1A	532921523	+	NA	NA	NA	NA	NA	NA	N	T	Y	Y	T	T	C	Y	Y	Y	C	Y	C	C	Y	Y	C	Y	C	C	C	C	Y	C	C	Y	Y	C	Y	Y	Y	T	Y	Y	Y	C	C	Y	T
AX-108974321	G/A	1A	532921842	+	NA	NA	NA	NA	NA	NA	G	G	G	G	G	G	A	G	G	G	A	G	A	A	G	G	A	G	A	A	A	A	G	A	A	G	G	A	G	G	G	G	G	G	G	A	A	G	G
AX-94390717	C/T	1A	533141060	+	NA	NA	NA	NA	NA	NA	C	T	C	C	T	T	C	C	C	C	C	C	C	C	C	C	C	C	C	C	C	C	C	C	C	C	C	C	C	C	C	T	C	C	C	C	C	C	T
AX-94978499	C/T	1A	533147935	+	NA	NA	NA	NA	NA	NA	C	C	C	C	C	C	C	C	C	C	C	C	C	C	C	C	C	C	C	C	C	C	C	C	C	C	C	C	T	C	T	T	T	C	C	C	C	C	T
AX-179475470	A/G	1A	533445272	+	NA	NA	NA	NA	NA	NA	N	G	R	R	G	G	A	R	A	R	N	R	A	A	A	R	A	R	A	A	A	A	R	A	A	R	R	A	R	R	N	G	R	R	R	A	A	R	G
AX-94633666	G/C	1A	533447857	+	NA	NA	NA	NA	NA	NA	G	G	G	G	C	C	G	G	G	G	G	G	G	G	G	G	G	G	G	G	G	G	G	G	C	C	C	G	N	C	G	G	G	G	G	G	G	C	G
AX-95189966	T/C	1A	533448281	+	NA	NA	NA	NA	NA	NA	T	C	T	T	C	C	T	T	T	T	T	T	T	T	T	T	T	T	T	T	T	T	T	T	T	T	T	T	T	T	T	T	T	T	T	T	T	T	T
AX-179559369	T/C	1A	533902154	+	NA	NA	NA	NA	NA	NA	Y	T	Y	Y	T	T	T	Y	Y	Y	C	Y	T	C	Y	Y	T	Y	T	T	T	T	Y	T	T	Y	Y	C	Y	Y	Y	T	Y	Y	Y	T	T	Y	T
AX-112286487	A/G	1A	533902931	+	NA	NA	NA	NA	NA	NA	A	A	A	A	A	A	A	A	A	A	G	A	A	G	A	A	A	A	A	A	A	A	A	A	A	A	A	G	A	A	A	A	A	A	A	A	A	A	A
AX-109519932	G/A	1A	534042871	+	NA	NA	NA	NA	NA	NA	G	A	G	G	A	A	A	G	G	G	G	G	A	G	G	G	A	G	A	A	A	A	G	A	A	G	G	G	G	G	G	A	G	G	G	A	A	G	A
AX-109094916	G/T	1A	534060608	+	NA	NA	NA	NA	NA	NA	G	G	G	G	G	G	T	G	G	G	G	G	T	G	G	G	T	G	T	T	T	T	G	T	T	G	G	G	G	G	G	T	G	G	G	T	T	G	T
AX-109037665	C/A	1A	534095625	+	NA	NA	NA	NA	NA	NA	C	A	C	C	A	A	C	C	C	C	C	C	C	C	C	C	C	C	C	C	C	C	C	C	C	C	C	C	C	C	C	C	C	C	C	C	C	C	C
AX-110051918	A/G	1A	534240511	+	NA	NA	NA	NA	NA	NA	A	G	A	A	G	G	G	A	A	A	A	A	G	A	A	A	G	A	G	G	G	G	A	G	G	A	A	A	A	A	A	A	A	A	A	G	G	A	A
AX-86177420	T/C	1A	534242444	+	NA	NA	NA	NA	NA	NA	T	C	T	T	C	C	C	T	T	T	T	T	C	T	T	T	C	T	C	C	C	C	T	C	C	T	T	T	T	T	N	C	T	T	T	C	C	T	C
AX-86177421	T/C	1A	534242444	+	NA	NA	NA	NA	NA	NA	T	C	T	T	C	C	C	T	T	T	T	T	C	T	T	T	C	T	C	C	C	C	T	C	C	T	T	T	T	T	T	C	T	T	T	C	C	T	C
AX-110399263	T/G	1A	534265086	+	NA	NA	NA	NA	NA	NA	T	T	T	T	T	T	G	T	T	T	T	T	G	T	T	T	G	T	G	G	G	G	T	G	G	T	T	T	T	T	T	T	T	T	T	G	G	T	T
AX-108869912	T/C	1A	534266810	+	NA	NA	NA	NA	NA	NA	T	T	T	T	T	T	C	T	T	T	T	T	C	T	N	T	C	T	C	C	C	C	T	C	C	T	T	T	T	T	T	T	T	T	T	C	C	T	T
AX-111503584	C/A	1A	534266847	+	NA	NA	NA	NA	NA	NA	C	C	C	C	C	C	A	C	C	C	C	C	A	C	C	C	A	C	A	A	A	A	C	A	A	C	C	C	C	C	C	C	C	C	C	A	A	C	C
AX-110629129	G/A	1A	534271958	+	NA	NA	NA	NA	NA	NA	G	G	G	G	G	G	A	G	G	G	G	G	A	G	G	G	A	G	A	A	A	A	G	A	A	G	G	G	G	G	G	A	G	G	G	A	A	G	A
AX-179476132	G/A	1A	534271958	+	NA	NA	NA	NA	NA	NA	G	G	G	G	G	N	A	G	G	G	G	G	A	G	G	G	A	G	A	A	A	A	G	A	A	G	G	G	G	G	G	A	G	G	G	A	A	G	A
AX-94635059	G/A	1A	534565596	+	NA	NA	NA	NA	NA	NA	G	G	G	G	G	G	G	G	G	G	G	G	G	G	A	G	G	G	G	G	G	G	A	G	G	G	G	G	G	G	A	A	G	G	A	G	G	G	A
AX-111467182	G/A	1A	535027307	+	NA	NA	NA	NA	NA	NA	G	G	G	G	G	G	G	G	G	G	G	G	G	G	G	G	G	G	G	G	G	G	G	G	G	G	G	G	G	G	G	A	G	G	G	G	G	G	A
AX-108947986	G/C	1A	535040533	+	NA	NA	NA	NA	NA	NA	G	G	G	G	G	G	C	G	G	G	G	G	C	G	C	G	N	G	C	C	C	C	G	C	C	G	G	G	G	G	G	G	G	G	C	C	C	G	G
AX-109350821	C/T	1A	535041178	+	NA	NA	NA	NA	NA	NA	C	C	C	C	C	C	T	C	C	C	C	C	T	C	T	C	T	C	T	T	T	T	C	T	T	C	C	C	C	C	C	C	C	C	T	T	T	C	C
AX-94555232	G/A	1A	535064470	+	NA	NA	NA	NA	NA	NA	R	A	R	A	G	G	G	G	A	A	A	A	G	G	G	A	A	A	A	A	A	A	G	A	A	A	A	A	G	G	A	A	A	G	G	A	A	G	A
AX-109872650	C/T	1A	535223903	+	NA	NA	NA	NA	NA	NA	C	C	C	C	C	C	T	C	C	C	C	C	T	C	T	C	T	C	T	T	T	T	C	T	T	C	C	C	C	C	C	C	C	C	T	T	T	C	C
AX-111043117	G/A	1A	535224026	+	NA	NA	NA	NA	NA	NA	G	A	G	G	A	A	G	G	G	G	G	G	G	G	G	G	G	G	G	G	G	G	G	G	G	G	G	G	G	G	G	A	G	G	G	G	G	G	A
AX-111683915	C/T	1A	535225556	+	NA	NA	NA	NA	NA	NA	C	T	C	C	T	T	C	C	C	C	C	C	C	C	C	C	C	C	C	C	C	C	C	C	C	C	C	C	C	C	C	T	C	C	C	C	C	C	T
AX-109855228	G/A	1A	535287538	+	NA	NA	NA	NA	NA	NA	G	G	G	G	G	G	A	G	G	G	G	G	A	G	A	G	A	G	A	A	A	A	G	A	A	G	G	G	G	G	G	G	G	G	A	A	A	G	G
AX-109408584	C/A	1A	535291589	+	NA	NA	NA	NA	NA	NA	C	C	C	C	C	C	A	C	C	C	C	C	A	C	A	C	A	C	A	A	A	A	C	A	A	C	C	C	C	C	C	C	C	C	A	A	A	C	C
AX-110946285	G/A	1A	535313985	+	NA	NA	NA	NA	NA	NA	G	A	G	G	A	A	G	G	G	G	G	G	G	G	G	G	G	G	G	G	G	G	G	G	G	G	G	G	G	G	G	A	G	G	G	G	G	G	A
AX-86166568	C/A	1A	535315011	+	NA	NA	NA	NA	NA	NA	C	A	C	C	A	A	C	C	C	C	C	C	C	C	C	C	C	C	C	C	C	C	C	C	C	C	C	C	C	C	C	A	C	C	C	C	C	C	A
AX-86166606	C/A	1A	535315011	+	NA	NA	NA	NA	NA	NA	C	A	C	C	A	A	C	C	C	C	C	C	C	C	C	C	C	C	C	C	C	C	C	C	C	C	C	C	C	C	C	A	C	C	C	C	C	C	A
AX-108856731	G/A	1A	535315645	+	NA	NA	NA	NA	NA	NA	G	G	G	G	G	G	A	G	G	G	G	G	A	G	A	G	A	G	A	A	A	A	G	A	A	G	G	G	G	G	G	G	G	G	A	A	A	G	G
AX-89543829	T/C	1A	535318185	+	NA	NA	NA	NA	NA	NA	T	T	T	T	T	T	C	T	T	T	T	T	C	T	C	T	C	T	C	C	C	C	T	C	C	T	T	T	T	T	T	T	T	T	C	C	C	C	T
AX-111607850	G/A	1A	535326776	+	NA	NA	NA	NA	NA	NA	G	G	G	G	G	G	R	G	G	G	G	G	A	G	A	G	A	G	A	A	A	A	G	A	A	G	G	G	G	G	G	G	G	G	A	A	A	G	G
AX-109580770	A/G	1A	535394925	+	NA	NA	NA	NA	NA	NA	A	G	A	A	G	G	A	A	A	A	A	A	A	A	A	A	A	A	A	A	A	A	A	A	A	A	A	A	A	A	A	G	A	A	A	A	A	A	G
AX-108851435	C/T	1A	535395052	+	NA	NA	NA	NA	NA	NA	C	T	C	C	T	T	C	C	C	C	C	C	C	C	C	C	C	C	C	C	C	C	C	C	C	C	C	C	C	C	C	T	C	C	C	C	C	C	T
AX-109957442	A/C	1A	535402002	+	NA	NA	NA	NA	NA	NA	A	C	A	A	C	C	A	A	A	A	A	A	A	A	A	A	A	A	A	A	A	A	A	A	A	A	A	A	A	A	A	C	A	A	A	A	A	A	C
AX-109923808	G/A	1A	535416481	+	NA	NA	NA	NA	NA	NA	G	A	G	G	N	A	G	G	G	G	G	G	G	G	G	G	G	G	G	G	G	G	G	G	G	G	G	G	G	G	G	A	G	G	G	G	G	G	A
AX-94616748	A/T	1A	535418438	+	NA	NA	NA	NA	NA	NA	A	T	A	A	N	T	A	A	A	A	A	A	A	A	A	A	A	N	A	A	A	A	A	A	A	A	A	A	A	A	A	T	A	A	A	A	A	A	T
AX-86178735	T/C	1A	535434598	+	NA	NA	NA	NA	NA	NA	T	C	T	T	C	C	T	T	T	T	T	T	T	T	T	T	T	T	T	T	T	T	T	T	T	T	T	T	T	T	T	C	T	T	T	T	T	T	C
AX-86178736	T/C	1A	535434598	+	NA	NA	NA	NA	NA	NA	T	C	T	T	C	C	T	T	T	T	T	T	T	T	T	T	T	T	T	T	T	T	T	T	T	T	T	T	T	T	T	C	T	T	T	T	T	T	C
AX-94552630	G/C	1A	535434880	+	NA	NA	NA	NA	NA	NA	G	C	G	G	C	C	G	G	G	G	G	G	G	G	G	G	G	G	G	G	G	G	G	G	G	G	G	G	G	G	G	C	G	G	G	G	G	G	C
AX-109322761	A/T	1A	535441395	+	NA	NA	NA	NA	NA	NA	A	A	A	A	A	A	T	A	A	A	A	A	T	A	T	A	T	A	T	T	T	T	A	T	T	A	A	A	A	A	A	A	A	A	T	T	T	A	A
AX-111063958	G/A	1A	535447719	+	NA	NA	NA	NA	NA	NA	G	G	G	G	G	G	A	G	G	G	G	G	A	G	A	G	A	G	A	A	A	A	G	A	A	G	G	G	G	G	G	G	G	G	A	A	A	G	G
AX-110535605	G/A	1A	535448123	+	NA	NA	NA	NA	NA	NA	G	G	G	G	G	G	A	G	G	G	G	G	A	G	A	G	A	G	A	A	A	A	G	A	A	G	G	G	G	G	G	G	G	G	A	A	A	G	G
AX-108840212	C/T	1A	535448672	+	NA	NA	NA	NA	NA	NA	C	C	C	C	C	C	T	C	C	C	C	C	T	C	T	C	T	C	T	T	T	T	C	T	T	C	C	C	C	C	C	C	C	C	T	T	T	C	C
AX-110933447	C/T	1A	535504190	+	NA	NA	NA	NA	NA	NA	C	C	T	T	T	T	C	T	T	C	C	T	C	C	C	C	C	T	C	C	C	C	T	C	C	T	T	C	C	C	T	C	T	T	C	C	C	T	C
AX-111551125	C/T	1A	535504244	+	NA	NA	NA	NA	NA	NA	C	C	T	T	T	T	C	T	T	C	C	T	C	C	C	C	C	T	C	C	C	C	T	C	C	T	T	C	C	C	T	C	T	T	C	C	C	T	C
AX-109482702	T/C	1A	535710516	+	NA	NA	NA	NA	NA	NA	C	C	T	T	C	C	T	T	T	C	C	T	T	C	T	C	T	T	T	T	T	T	T	T	T	T	T	C	C	C	T	T	T	T	T	T	T	C	T
AX-108745213	C/T	1A	535733947	+	NA	NA	NA	NA	NA	NA	C	C	C	C	T	T	C	C	C	C	C	C	C	C	C	C	C	C	C	C	C	C	C	C	C	C	C	C	C	C	C	C	C	C	C	C	C	T	C
AX-111826929	G/A	1A	535756654	+	NA	NA	NA	NA	NA	NA	G	G	G	G	A	A	G	G	G	G	G	G	G	G	G	G	G	G	G	G	G	G	G	G	G	G	G	G	G	G	G	G	G	G	G	G	G	A	G
AX-110017150	G/A	1A	535773259	+	NA	NA	NA	NA	NA	NA	G	G	G	G	A	A	G	G	G	G	G	G	G	G	G	G	G	G	G	G	G	G	G	G	G	G	G	G	G	G	G	G	G	G	G	G	G	A	G
AX-108873889	C/T	1A	535881656	+	NA	NA	NA	NA	NA	NA	C	C	C	C	T	T	C	C	C	C	C	C	C	C	C	C	C	C	C	C	C	C	C	C	C	C	C	C	C	C	C	C	C	C	C	C	C	T	C
AX-108973090	C/T	1A	536062205	+	NA	NA	NA	NA	NA	NA	C	C	C	C	T	T	C	C	C	C	C	C	C	C	C	C	C	C	C	C	C	C	C	C	C	C	C	C	C	C	C	C	C	C	C	C	C	T	C
AX-110413668	C/T	1A	536066322	+	NA	NA	NA	NA	NA	NA	C	C	C	C	T	T	C	C	C	C	C	C	C	C	C	C	C	C	C	C	C	C	C	C	C	C	C	C	C	C	C	C	C	C	C	C	C	T	C
AX-109903014	C/A	1A	536207822	+	NA	NA	NA	NA	NA	NA	A	A	C	C	A	A	C	C	C	A	A	C	C	A	C	A	C	C	C	C	C	C	C	C	C	C	C	A	A	A	C	C	C	C	C	C	C	A	C
AX-110085969	C/T	1A	536292901	+	NA	NA	NA	NA	NA	NA	T	T	C	C	T	T	C	C	C	T	T	C	C	T	C	T	C	C	C	C	C	C	C	C	C	C	C	T	T	T	C	C	C	C	C	C	C	T	C
AX-108933189	C/T	1A	536433969	+	NA	NA	NA	NA	NA	NA	C	C	T	T	T	T	C	T	T	C	C	T	C	C	C	C	C	T	C	C	C	C	T	C	C	T	T	C	C	C	T	T	T	T	C	C	C	T	T
AX-89675899	G/T	1A	536439342	+	NA	NA	NA	NA	NA	NA	T	T	G	G	G	G	G	G	G	T	T	G	G	T	G	T	G	G	G	G	G	G	G	G	G	G	G	T	T	T	G	G	G	G	G	G	G	G	G
AX-94650089	G/T	1A	536439342	+	NA	NA	NA	NA	NA	NA	T	T	G	G	G	G	G	G	G	T	T	G	G	T	G	T	G	G	G	G	G	G	G	G	G	G	G	T	T	T	G	G	G	G	G	G	G	G	G
AX-110422022	G/C	1A	536442515	+	NA	NA	NA	NA	NA	NA	G	G	C	C	C	C	G	C	C	G	G	C	G	G	G	G	G	C	G	G	G	G	C	G	G	C	C	G	G	G	C	C	C	C	G	G	G	C	C
AX-109540133	A/G	1A	536614283	+	NA	NA	NA	NA	NA	NA	A	A	G	G	G	G	A	G	G	A	A	G	A	A	A	A	A	G	A	A	A	A	G	A	A	G	G	A	A	A	G	G	G	G	A	A	A	G	G
AX-179558639	A/G	1A	536614283	+	NA	NA	NA	NA	NA	NA	A	A	G	G	G	G	A	G	G	A	A	G	A	A	A	A	A	G	A	A	A	A	G	A	A	G	G	A	A	A	G	G	G	G	A	A	A	G	G
AX-111480989	A/G	1A	536875132	+	NA	NA	NA	NA	NA	NA	A	G	A	A	G	G	G	A	A	A	G	A	G	G	G	A	G	A	G	G	G	G	A	G	G	A	A	G	A	A	A	G	A	A	G	G	G	G	G
AX-111481900	C/T	1A	539758323	+	NA	NA	NA	NA	NA	NA	C	C	C	T	C	C	C	T	T	C	C	T	C	C	C	C	C	T	C	C	C	C	C	C	C	T	T	C	C	C	C	C	T	T	C	C	C	C	C
AX-94779447	G/A	1A	539762276	+	NA	NA	NA	NA	NA	NA	G	G	G	A	G	G	G	G	G	G	G	G	G	G	G	G	G	G	G	G	G	G	A	G	A	A	G	G	G	G	G	A	G	G	G	G	G	G	A
AX-86170726	T/C	1A	539762811	+	NA	NA	NA	NA	NA	NA	T	T	T	C	T	T	T	C	C	T	T	C	T	T	T	T	T	C	T	T	T	T	T	T	T	C	C	T	T	T	T	T	C	C	T	T	T	T	T
AX-95660473	T/C	1A	539762811	+	NA	NA	NA	NA	NA	NA	T	T	T	C	T	T	T	C	C	T	T	C	T	T	T	T	T	C	T	T	T	T	T	T	T	C	C	T	T	T	T	T	N	C	T	T	T	T	T
AX-109914567	A/G	1A	539880228	+	NA	NA	NA	NA	NA	NA	A	A	A	G	A	A	A	G	G	A	A	G	A	A	A	A	A	G	A	A	A	A	A	A	A	G	G	A	A	A	A	A	G	G	A	A	A	A	A
AX-108805479	G/A	1A	539881268	+	NA	NA	NA	NA	NA	NA	G	G	G	N	G	G	G	A	A	G	G	A	G	G	G	G	G	A	G	G	G	G	G	G	G	R	A	G	G	G	G	G	A	A	G	G	G	G	G
AX-179560655	C/A	1A	539900017	+	NA	NA	NA	NA	NA	NA	C	C	C	A	C	C	C	A	A	C	C	A	C	C	C	C	C	A	C	C	C	C	C	C	C	A	A	C	C	C	C	C	A	A	C	C	C	C	C
AX-89658718	C/A	1A	539900017	+	NA	NA	NA	NA	NA	NA	C	C	C	A	C	C	C	A	A	C	C	A	C	C	C	C	C	A	C	C	C	C	C	C	C	A	A	C	C	C	C	C	A	A	C	C	C	C	C
AX-108915357	T/C	1A	539964181	+	NA	NA	NA	NA	NA	NA	T	T	T	C	T	T	T	C	C	T	T	C	T	T	T	T	T	C	T	T	T	T	T	T	T	C	C	T	T	T	T	T	C	C	T	T	T	T	T
AX-110418379	T/C	1A	539978702	+	NA	NA	NA	NA	NA	NA	T	T	C	T	T	T	T	T	T	T	T	T	T	T	T	T	T	T	T	T	T	T	C	T	T	T	T	T	C	C	C	T	T	T	T	T	T	T	T
AX-179561243	T/C	1A	540051956	+	NA	NA	NA	NA	NA	NA	T	T	C	T	T	T	T	C	T	T	T	T	T	T	T	T	T	C	T	T	T	T	C	T	T	C	T	T	C	C	C	T	T	T	T	T	T	T	T
AX-94732625	T/C	1A	540051956	+	NA	NA	NA	NA	NA	NA	T	T	C	T	T	T	T	C	T	T	T	T	T	T	T	T	T	C	T	T	T	T	C	T	T	C	T	T	C	C	C	T	T	T	T	T	T	T	T
AX-179558241	T/C	1A	540056839	+	NA	NA	NA	NA	NA	NA	T	T	C	T	T	T	T	C	T	T	T	T	T	T	T	T	T	C	T	T	T	T	C	T	T	C	T	T	C	C	N	T	T	T	T	T	T	T	T
AX-95658130	T/C	1A	540056839	+	NA	NA	NA	NA	NA	NA	T	T	C	T	T	T	T	C	T	T	T	T	T	T	T	T	T	N	T	T	T	T	C	T	T	C	T	T	N	C	C	T	T	T	T	T	T	T	T
AX-86173034	A/G	1A	540146970	+	NA	NA	NA	NA	NA	NA	G	A	G	A	A	A	G	A	A	G	A	A	G	A	G	G	G	A	G	G	G	G	G	G	G	A	A	A	G	G	G	G	A	A	G	G	G	A	A
AX-86173035	A/G	1A	540146970	+	NA	NA	NA	NA	NA	NA	G	A	G	A	A	A	G	A	A	G	A	A	G	A	G	G	G	A	G	G	G	G	G	G	G	A	A	A	G	G	G	G	A	A	G	G	G	A	A
AX-109353445	G/T	1A	540149217	+	NA	NA	NA	NA	NA	NA	G	T	G	T	T	T	G	G	T	G	T	T	G	T	G	G	G	G	G	G	G	G	G	G	G	G	T	T	G	G	G	G	T	T	G	G	G	T	T
AX-110419391	G/C	1A	540198100	+	NA	NA	NA	NA	NA	NA	G	C	G	C	C	C	G	G	C	G	C	C	G	C	G	G	G	G	G	G	G	G	G	G	G	G	C	C	G	G	G	G	C	C	G	G	G	C	C
AX-95659080	G/A	1A	540336630	+	NA	NA	NA	NA	NA	NA	G	A	G	A	A	A	G	A	A	G	G	A	G	G	G	G	G	A	G	G	G	G	G	G	G	A	A	G	G	G	G	G	A	G	G	G	G	G	A
AX-108770145	T/G	1A	540656663	+	NA	NA	NA	NA	NA	NA	G	T	G	T	T	T	T	T	T	G	T	T	T	T	T	G	T	T	T	T	T	T	G	T	T	T	T	T	G	G	G	G	T	T	T	T	T	T	T
AX-109357617	G/A	1A	540662859	+	NA	NA	NA	NA	NA	NA	A	G	A	G	G	G	G	G	G	A	G	G	G	G	G	A	G	G	G	G	G	G	A	G	G	G	G	G	A	A	A	A	G	G	G	G	G	G	G
AX-108919524	T/G	1A	540666464	+	NA	NA	NA	NA	NA	NA	G	T	G	T	T	T	T	T	T	G	T	T	T	T	T	G	T	T	T	T	T	T	G	T	T	T	T	T	G	G	G	G	T	T	T	T	T	T	T
AX-109901742	C/T	1A	540712921	+	NA	NA	NA	NA	NA	NA	T	C	C	C	C	C	C	C	C	T	C	C	C	C	C	T	C	C	C	C	C	C	C	C	C	C	C	C	C	C	C	Y	C	C	C	C	C	C	C
AX-109306138	T/A	1A	540713421	+	NA	NA	NA	NA	NA	NA	T	A	T	T	A	T	A	T	T	T	T	T	T	T	T	T	T	T	T	T	T	T	T	T	T	T	T	T	T	T	T	A	T	T	T	T	T	T	A
AX-110618169	T/C	1A	540733790	+	NA	NA	NA	NA	NA	NA	T	T	C	T	T	T	T	T	T	T	T	T	T	T	T	T	T	N	T	T	T	T	C	T	T	T	T	T	C	C	C	T	T	T	T	T	T	T	T
AX-109390984	A/C	1A	540748797	+	NA	NA	NA	NA	NA	NA	A	A	C	A	A	A	A	A	A	A	A	A	A	A	A	A	A	A	A	A	A	A	C	A	A	A	A	A	C	C	C	A	A	A	A	A	A	A	A
AX-94464571	C/T	1A	541632629	+	NA	NA	NA	NA	NA	NA	C	T	C	T	T	T	C	C	T	C	T	T	C	T	C	C	C	C	C	C	C	C	C	C	C	C	T	T	C	C	C	C	T	T	C	C	C	T	T
AX-179559867	G/A	1A	541632726	+	NA	NA	NA	NA	NA	NA	G	A	G	A	A	A	G	G	A	G	A	A	G	A	G	G	G	G	G	G	G	G	G	G	G	G	A	A	G	G	G	G	A	A	G	G	G	A	A
AX-95631691	G/A	1A	541632726	+	NA	NA	NA	NA	NA	NA	R	A	R	A	A	A	R	G	A	G	A	A	G	A	G	G	G	G	G	G	G	G	G	G	G	G	A	A	G	G	G	G	A	A	G	R	G	A	A
AX-111585441	C/T	1A	541772826	+	NA	NA	NA	NA	NA	NA	C	C	C	C	C	C	C	C	C	C	C	C	C	C	C	C	C	C	C	C	C	C	C	C	C	C	C	C	C	C	C	T	C	C	C	C	C	C	C
AX-95153545	G/A	1A	541981241	+	NA	NA	NA	NA	NA	NA	G	G	G	G	G	G	G	G	A	G	G	G	G	G	G	G	A	G	G	G	G	G	G	A	G	G	G	G	G	G	G	G	G	G	G	A	A	G	G
AX-86164880	A/C	1A	542136642	+	NA	NA	NA	NA	NA	NA	A	C	A	C	C	C	A	A	C	A	C	C	A	C	A	A	A	A	A	A	A	A	A	A	A	A	C	C	A	A	A	C	C	C	A	A	A	C	C
AX-86164881	A/C	1A	542136642	+	NA	NA	NA	NA	NA	NA	A	N	A	C	C	C	A	A	C	A	C	C	A	C	A	A	A	A	A	A	A	A	A	A	A	A	C	C	A	A	A	C	C	C	A	A	A	C	C
AX-86165674	T/G	1A	542136735	+	NA	NA	NA	NA	NA	NA	T	G	T	G	G	G	T	T	G	T	G	G	T	G	T	T	T	T	T	T	T	T	T	T	T	T	G	G	T	T	T	G	G	G	T	T	T	G	G
AX-86165675	T/G	1A	542136735	+	NA	NA	NA	NA	NA	NA	T	G	T	G	G	G	T	T	G	T	G	G	T	G	T	T	T	T	T	T	T	T	T	T	T	T	G	G	T	T	T	G	G	G	T	T	T	G	G
AX-111043857	T/C	1A	542429785	+	NA	NA	NA	NA	NA	NA	T	C	T	C	C	C	T	T	C	T	C	C	T	C	T	T	T	T	T	T	T	T	T	T	T	T	C	C	T	T	T	C	C	C	T	T	T	C	C
AX-108773409	T/C	1A	542431108	+	NA	NA	NA	NA	NA	NA	T	C	T	C	C	C	T	T	C	T	C	C	T	C	T	T	T	T	T	T	T	T	T	T	T	T	C	C	T	T	T	C	C	C	T	T	T	C	C
AX-109861581	C/T	1A	542431746	+	NA	NA	NA	NA	NA	NA	C	T	C	T	T	T	C	C	T	C	T	T	C	T	C	C	C	C	C	C	C	C	C	C	C	C	T	T	C	C	C	T	N	T	C	C	C	T	T
AX-109347921	C/T	1A	542433770	+	NA	NA	NA	NA	NA	NA	C	T	C	T	T	T	C	C	T	C	T	T	C	T	C	C	C	C	C	C	C	C	C	C	C	C	T	T	C	C	C	T	T	T	C	C	C	T	T
AX-179475710	G/A	1A	542438627	+	NA	NA	NA	NA	NA	NA	G	A	G	A	A	A	G	G	A	G	A	A	G	A	G	N	G	G	G	G	G	G	G	G	G	G	A	A	G	G	G	A	A	A	G	G	G	A	A
AX-95661370	G/A	1A	542438627	+	NA	NA	NA	NA	NA	NA	G	A	G	A	A	A	G	G	A	G	A	A	G	A	G	G	G	G	G	G	G	G	G	G	G	G	A	A	G	G	G	A	A	A	G	G	G	A	A
AX-110986688	G/A	1A	542747918	+	NA	NA	NA	NA	NA	NA	G	A	G	A	A	A	G	G	A	G	A	A	G	A	G	G	G	G	G	G	G	G	G	G	G	G	A	A	G	G	G	A	A	A	G	G	G	A	A
AX-110469378	T/C	1A	542767509	+	NA	NA	NA	NA	NA	NA	T	C	T	C	C	C	T	T	C	T	C	C	T	C	T	T	T	T	T	T	T	T	T	T	T	T	C	C	T	T	T	C	C	C	T	T	T	C	C
AX-112287898	A/G	1A	542825304	+	NA	NA	NA	NA	NA	NA	A	G	A	G	G	G	A	A	G	A	G	G	A	G	A	A	A	A	A	A	A	A	A	A	A	A	G	G	A	A	A	G	G	G	A	A	A	G	G
AX-111468514	T/G	1A	542867766	+	NA	NA	NA	NA	NA	NA	T	G	T	G	G	G	T	T	G	T	G	G	T	G	T	T	T	T	T	T	T	T	T	T	T	T	G	G	T	T	T	G	G	G	T	T	T	G	G
AX-109445937	C/T	1A	543070082	+	NA	NA	NA	NA	NA	NA	C	T	C	T	T	T	C	C	T	C	T	T	C	T	C	C	C	C	C	C	C	C	C	C	C	C	T	T	C	C	C	T	T	T	C	C	C	T	T
AX-108915106	T/C	1A	543072995	+	NA	NA	NA	NA	NA	NA	T	C	T	C	C	C	T	T	C	T	C	C	T	C	T	T	T	T	T	T	T	T	T	T	T	T	C	C	T	T	T	C	C	C	T	T	T	C	C
AX-110962071	C/T	1A	543420779	+	NA	NA	NA	NA	NA	NA	C	T	C	T	T	T	C	C	T	C	T	T	C	T	C	C	C	C	C	C	C	C	C	C	C	C	T	T	C	C	C	T	T	T	C	C	C	T	T
AX-109003847	A/C	1A	543641846	+	NA	NA	NA	NA	NA	NA	A	C	C	C	C	C	A	A	C	A	C	C	A	C	A	A	A	A	A	A	A	A	C	A	A	A	C	C	C	C	C	C	C	C	A	A	A	C	C
AX-111228165	G/C	1A	543966503	+	NA	NA	NA	NA	NA	NA	G	C	G	C	C	C	G	G	C	G	G	C	G	G	G	G	G	G	G	G	G	G	G	G	G	G	C	G	G	G	G	C	C	G	G	G	G	G	C
AX-110404143	C/T	1A	544052013	+	NA	NA	NA	NA	NA	NA	C	T	C	T	T	T	C	C	T	C	C	T	C	C	C	C	C	C	C	C	C	C	C	C	C	C	T	C	C	C	C	T	T	C	C	C	C	C	T
AX-111174283	A/G	1A	544054450	+	NA	NA	NA	NA	NA	NA	A	G	A	G	G	G	A	A	G	A	A	G	A	A	A	A	A	A	A	A	A	A	A	A	A	A	G	A	A	A	A	G	G	A	A	A	A	A	G
AX-94773493	A/G	1A	544054450	+	NA	NA	NA	NA	NA	NA	A	G	A	G	G	G	A	A	G	A	A	G	A	A	A	A	A	A	A	A	A	A	A	A	A	A	G	A	A	A	A	G	G	A	A	A	A	A	G
AX-94420038	A/C	1A	544055251	+	NA	NA	NA	NA	NA	NA	A	C	A	C	C	C	A	A	C	A	A	C	A	A	A	A	A	A	A	A	A	A	A	A	A	A	C	A	A	A	A	C	C	A	A	A	A	A	C
AX-95681944	A/C	1A	544055251	+	NA	NA	NA	NA	NA	NA	A	C	A	C	C	C	A	A	C	A	A	C	A	A	A	A	A	A	A	A	A	A	A	A	A	A	C	A	A	A	A	C	C	A	A	A	A	A	C
AX-109405983	T/C	1A	544055675	+	NA	NA	NA	NA	NA	NA	T	C	T	C	C	C	T	T	C	T	T	C	T	T	T	T	T	T	T	T	T	T	T	T	T	T	C	T	T	T	T	C	C	T	T	T	T	T	C
AX-110492212	A/G	1A	544131148	+	NA	NA	NA	NA	NA	NA	G	G	A	G	G	G	A	A	G	G	A	G	A	A	A	G	A	A	A	A	A	A	A	A	A	A	G	A	A	A	A	G	G	A	A	A	A	A	G
AX-112286075	A/C	1A	544160205	+	NA	NA	NA	NA	NA	NA	C	C	A	C	C	C	A	A	C	C	A	C	A	A	A	C	A	A	A	A	A	A	A	A	A	A	C	A	A	A	A	C	C	A	A	A	A	A	C
AX-94532291	G/T	1A	544170272	+	NA	NA	NA	NA	NA	NA	T	T	G	T	T	T	G	G	T	T	G	T	G	G	G	T	G	G	G	G	G	G	G	G	G	G	T	G	G	G	G	T	T	G	G	G	G	G	T
AX-179561074	C/T	1A	544374255	+	NA	NA	NA	NA	NA	NA	T	T	C	T	T	T	C	C	T	T	T	T	C	T	C	T	C	C	C	C	C	C	C	C	N	C	T	T	C	C	N	T	T	T	C	C	C	T	T
AX-95659890	C/T	1A	544374255	+	NA	NA	NA	NA	NA	NA	T	T	C	T	T	T	C	C	T	T	T	T	C	T	C	T	C	C	C	C	C	C	C	C	C	C	T	T	C	C	C	T	T	T	C	C	C	T	T
AX-94793674	C/T	1A	544376561	+	NA	NA	NA	NA	NA	NA	C	C	C	T	T	T	C	C	T	C	C	C	C	C	N	C	T	C	T	T	T	T	T	T	T	T	C	T	C	T	C	T	Y	C	C	T	T	T	C
AX-86180342	C/T	1A	544378391	+	NA	NA	NA	NA	NA	NA	C	C	T	C	C	C	C	T	C	C	C	C	C	C	C	C	C	T	C	C	C	C	T	C	T	T	C	C	T	T	T	C	C	C	C	C	C	C	C
AX-86180343	C/T	1A	544378391	+	NA	NA	NA	NA	NA	NA	C	C	T	C	C	C	C	T	C	N	C	C	C	C	C	N	C	T	C	C	C	C	T	C	T	T	C	C	T	T	T	C	C	C	C	C	C	C	C
AX-95139778	T/C	1A	544391456	+	NA	NA	NA	NA	NA	NA	C	T	C	T	T	T	T	C	T	C	T	T	T	T	T	C	T	C	T	T	T	T	C	T	C	C	T	T	C	C	C	T	T	T	T	T	T	T	T
AX-95681740	T/C	1A	544391456	+	NA	NA	NA	NA	NA	NA	C	T	C	T	T	T	T	C	T	C	T	T	T	T	T	C	T	C	T	T	T	T	C	T	C	C	T	T	C	C	C	T	T	T	T	T	T	T	T
AX-94964398	C/T	1A	545475005	+	NA	NA	NA	NA	NA	NA	C	T	C	T	C	C	C	C	T	C	C	T	C	C	C	C	C	C	C	C	C	C	C	C	N	C	T	C	C	C	C	C	T	C	C	C	C	C	T
AX-109003129	T/C	1A	545530659	+	NA	NA	NA	NA	NA	NA	C	C	T	C	C	C	T	T	C	C	T	C	T	T	T	C	T	T	T	T	T	T	T	T	T	T	C	T	C	C	C	T	C	T	T	T	T	T	C
AX-179560639	T/C	1A	545530659	+	NA	NA	NA	NA	NA	NA	C	C	T	C	C	C	T	T	C	C	T	C	T	T	T	C	T	T	T	T	T	T	T	T	T	T	C	T	C	C	C	T	C	T	T	T	T	T	C
AX-111662237	T/G	1A	545860197	+	NA	NA	NA	NA	NA	NA	T	G	T	G	T	T	T	T	G	T	T	G	T	T	T	T	T	T	T	T	T	T	T	T	T	T	G	T	T	T	T	T	G	T	T	T	T	T	G
AX-108833986	A/T	1A	545876497	+	NA	NA	NA	NA	NA	NA	A	T	A	T	A	A	A	A	T	A	A	T	A	A	A	A	A	A	A	A	A	A	A	A	A	A	T	A	A	A	A	A	T	A	A	A	A	A	T
AX-110082485	A/G	1A	545891327	+	NA	NA	NA	NA	NA	NA	A	G	A	G	A	A	A	A	G	A	A	G	A	A	A	A	A	A	A	A	A	A	A	A	A	A	G	A	A	A	A	A	G	A	A	A	A	A	G
AX-95631864	A/G	1A	545891327	+	NA	NA	NA	NA	NA	NA	A	G	A	G	A	A	A	A	G	A	A	G	A	A	A	A	A	A	A	A	A	A	A	A	A	A	G	A	A	A	A	A	G	A	A	A	A	A	G
AX-94406527	C/G	1A	546034313	+	NA	NA	NA	NA	NA	NA	C	C	C	C	C	C	C	C	C	C	G	C	C	G	C	C	C	G	C	C	C	C	C	C	C	G	C	G	C	C	C	G	C	G	C	C	C	G	C
AX-179475885	C/T	1A	546036276	+	NA	NA	NA	NA	NA	NA	C	T	C	T	C	C	C	C	T	C	C	T	C	C	C	C	C	C	C	C	C	C	C	C	C	C	T	C	C	C	C	C	T	C	C	C	C	C	T
AX-179562333	A/G	1A	546042690	+	NA	NA	NA	NA	NA	NA	G	A	A	A	G	G	A	A	A	G	A	A	A	A	A	N	A	A	A	A	A	A	A	A	A	A	A	A	G	G	G	A	A	A	A	A	A	A	A
AX-109960530	T/G	1A	546044424	+	NA	NA	NA	NA	NA	NA	G	T	T	T	G	G	T	T	T	G	T	T	T	T	T	G	T	T	T	T	T	T	T	T	T	T	T	T	G	G	G	T	T	T	T	T	T	T	T
AX-179561132	T/G	1A	546044424	+	NA	NA	NA	NA	NA	NA	G	T	T	T	G	G	T	T	T	G	T	T	T	T	T	G	T	T	T	T	T	T	T	T	T	T	T	T	G	G	G	T	T	T	T	T	T	T	T
AX-86183918	A/C	1A	546044483	+	NA	NA	NA	NA	NA	NA	C	A	A	A	C	C	A	A	A	C	C	A	A	C	A	C	A	C	A	A	A	A	A	A	A	C	A	C	C	C	C	C	A	C	A	A	A	C	A
AX-86183919	A/C	1A	546044483	+	NA	NA	NA	NA	NA	NA	C	A	A	A	C	C	A	A	A	C	C	A	A	C	A	C	A	C	A	A	A	A	A	A	A	C	A	C	C	C	C	C	A	C	A	A	A	C	A
AX-109433430	C/T	1A	546051703	+	NA	NA	NA	NA	NA	NA	T	C	C	C	T	T	C	C	C	T	C	C	C	C	C	T	C	C	C	C	C	C	C	C	C	C	C	C	T	T	T	C	C	C	C	C	C	C	C
AX-109031452	G/T	1A	546173916	+	NA	NA	NA	NA	NA	NA	G	T	G	T	G	G	G	N	T	G	G	T	N	G	N	G	G	G	G	N	G	G	N	G	G	G	T	G	G	G	G	G	T	G	G	G	G	G	T
AX-109406053	T/C	1A	546176055	+	NA	NA	NA	NA	NA	NA	C	T	T	T	C	C	T	T	T	C	T	T	T	T	T	C	T	T	T	T	T	T	T	T	T	T	T	T	C	C	C	T	T	T	T	T	T	T	T
AX-109544448	C/A	1A	546212974	+	NA	NA	NA	NA	NA	NA	M	C	C	C	M	N	C	C	C	M	C	C	C	C	C	M	C	C	C	C	C	C	C	C	C	C	C	N	M	M	M	C	C	C	C	C	C	C	C
AX-95653422	C/A	1A	546212974	+	NA	NA	NA	NA	NA	NA	M	C	C	C	M	M	C	C	C	M	C	C	C	C	C	M	C	C	C	C	C	C	C	C	C	C	C	C	M	M	M	C	N	C	C	C	C	C	C
AX-110530510	C/T	1A	546225769	+	NA	NA	NA	NA	NA	NA	C	T	C	T	C	C	C	C	T	C	C	T	C	C	C	C	C	C	C	C	C	C	C	C	C	C	T	C	C	C	C	C	T	C	C	C	C	C	T
AX-111047403	A/G	1A	546503556	+	NA	NA	NA	NA	NA	NA	A	G	A	G	A	A	A	A	G	A	A	G	A	A	A	A	A	A	A	A	A	A	A	A	A	A	G	A	A	A	N	A	G	A	A	A	A	A	R
AX-110052929	C/T	1A	546798950	+	NA	NA	NA	NA	NA	NA	T	C	C	C	Y	T	C	C	C	Y	C	C	C	C	C	T	C	C	C	C	C	C	C	C	C	C	C	C	C	C	Y	C	C	C	C	C	C	C	C
AX-111471091	T/C	1A	546801510	+	NA	NA	NA	NA	NA	NA	T	C	T	C	T	T	T	T	C	T	C	C	T	C	T	T	T	C	T	T	T	T	T	T	T	C	C	C	T	T	T	C	C	N	T	T	T	C	C
AX-109382284	G/A	1A	546802644	+	NA	NA	NA	NA	NA	NA	G	A	G	A	G	G	G	G	A	G	G	A	G	G	G	G	G	G	G	G	G	G	G	G	G	G	A	G	G	G	G	G	A	G	G	G	G	G	A
AX-109951905	T/G	1A	546987183	+	NA	NA	NA	NA	NA	NA	T	G	T	G	T	T	T	T	G	T	T	G	T	T	T	T	T	T	T	T	T	T	T	T	T	T	G	T	T	T	T	T	G	T	T	T	T	T	G
AX-109900225	T/C	1A	547004238	+	NA	NA	NA	NA	NA	NA	T	C	T	C	T	T	T	T	C	T	C	C	T	C	T	T	T	C	T	T	T	T	T	T	T	C	C	C	T	T	T	C	C	C	T	T	T	C	C
AX-108740186	A/G	1A	547005379	+	NA	NA	NA	NA	NA	NA	A	G	A	G	A	A	A	A	G	A	A	G	A	A	A	A	A	A	A	A	A	A	A	A	A	A	G	A	A	A	A	A	G	A	A	A	A	A	G
AX-111541345	G/A	1A	547018069	+	NA	NA	NA	NA	NA	NA	G	R	G	R	G	G	G	G	R	G	G	R	G	G	G	G	G	G	G	G	G	G	G	G	G	G	A	G	G	G	G	G	A	G	G	G	G	G	A
AX-94623134	G/A	1A	547311811	+	NA	NA	NA	NA	NA	NA	R	G	G	G	R	R	G	G	G	R	G	G	G	G	G	R	G	G	G	G	G	G	G	G	G	R	G	G	G	G	G	G	G	G	G	G	G	G	G
AX-179561447	C/T	1A	547316935	+	NA	NA	NA	NA	NA	NA	C	C	T	C	C	C	T	T	C	C	C	C	T	C	T	C	T	C	T	T	T	T	T	T	T	C	C	C	T	T	T	C	C	C	T	T	T	C	C
AX-95629320	C/T	1A	547316935	+	NA	NA	NA	NA	NA	NA	C	C	T	C	C	C	T	T	C	C	C	C	T	C	T	C	T	C	T	T	T	T	T	T	T	C	C	C	T	T	T	C	C	C	T	T	T	C	C
AX-108970060	A/T	1A	547332000	+	NA	NA	NA	NA	NA	NA	A	T	A	T	A	A	A	A	T	A	N	T	A	A	A	A	A	A	A	A	A	A	A	A	A	N	T	A	A	A	A	A	T	A	A	A	A	A	T
AX-111041494	C/T	1A	547332535	+	NA	NA	NA	NA	NA	NA	C	T	Y	T	C	C	C	C	T	C	T	T	C	T	C	C	C	T	Y	Y	Y	Y	Y	C	Y	Y	T	T	Y	Y	Y	T	T	T	C	C	C	T	T
AX-94407377	C/G	1A	547384333	+	NA	NA	NA	NA	NA	NA	C	C	C	C	C	C	C	C	C	C	G	C	C	G	C	C	C	G	C	C	C	C	C	C	C	C	C	G	C	C	C	G	C	G	C	C	C	G	C
AX-94672901	G/A	1A	547906982	+	NA	NA	NA	NA	NA	NA	A	A	G	A	A	A	G	G	A	A	G	A	G	G	G	A	G	G	G	G	G	G	G	G	G	A	A	G	G	G	N	G	A	G	G	G	G	G	A
AX-95685167	G/A	1A	547906982	+	NA	NA	NA	NA	NA	NA	A	A	G	A	A	A	G	G	A	A	G	A	G	G	G	A	G	G	G	G	G	G	G	G	G	A	A	G	G	G	G	G	A	G	G	G	G	G	A
AX-158539761	T/C	1A	547965988	+	NA	NA	NA	NA	NA	NA	T	T	T	T	T	T	T	T	T	T	N	T	T	Y	T	T	T	Y	T	T	T	T	T	T	T	T	T	Y	T	T	T	Y	T	Y	T	T	T	Y	T
AX-95679435	T/C	1A	547965988	+	NA	NA	NA	NA	NA	NA	T	T	T	T	T	T	T	T	T	T	Y	T	T	Y	T	T	T	Y	T	T	T	T	T	T	T	T	T	Y	T	T	T	Y	T	Y	T	T	T	Y	T
AX-89469806	A/G	1A	548453188	+	NA	NA	NA	NA	NA	NA	A	G	A	G	A	A	A	A	G	A	G	G	A	G	A	A	A	G	A	A	A	A	A	A	A	G	G	G	G	G	G	G	G	G	A	A	A	G	G
AX-110912509	G/A	1A	548488229	+	NA	NA	NA	NA	NA	NA	G	G	A	G	G	G	A	A	G	G	G	G	A	G	A	G	A	G	A	A	A	A	A	A	A	G	G	G	G	G	G	G	G	G	A	A	A	G	G
AX-109423039	A/G	1A	548534574	+	NA	NA	NA	NA	NA	NA	A	A	A	A	A	A	A	A	A	A	A	A	A	A	A	A	A	G	A	A	A	A	A	A	A	A	A	A	A	A	A	A	A	A	A	A	A	A	A
AX-94859613	T/G	1A	548564057	+	NA	NA	NA	NA	NA	NA	T	T	T	T	T	T	T	T	T	T	T	T	T	T	T	T	T	G	T	T	T	T	T	T	T	T	T	T	T	T	T	T	T	T	T	T	T	T	T
AX-95683657	T/G	1A	548564057	+	NA	NA	NA	NA	NA	NA	T	T	T	T	T	T	T	T	T	T	T	T	T	T	T	T	T	G	T	T	T	T	T	T	T	T	T	T	T	T	T	T	T	T	T	T	T	T	T
AX-179557630	G/A	1A	548941327	+	NA	NA	NA	NA	NA	NA	A	G	G	G	A	A	G	G	G	A	G	G	G	G	G	A	G	A	G	G	G	G	G	G	G	G	G	G	G	G	G	G	G	G	G	G	G	G	G
AX-95630023	G/A	1A	548941327	+	NA	NA	NA	NA	NA	NA	A	G	G	G	A	A	G	G	G	A	G	G	G	G	G	A	G	A	G	G	G	G	G	G	G	G	G	G	G	G	G	G	G	G	G	G	G	G	G
AX-112289859	A/G	1A	549420609	+	NA	NA	NA	NA	NA	NA	A	G	A	G	A	A	A	A	G	A	A	G	A	A	A	A	A	A	A	A	A	A	N	A	A	G	G	A	A	A	A	A	G	A	A	A	A	A	G
AX-179560520	A/G	1A	549420609	+	NA	NA	NA	NA	NA	NA	A	G	A	G	A	A	A	A	G	A	A	G	A	A	A	A	A	A	A	A	A	A	A	A	A	G	G	A	A	A	A	A	G	A	A	A	A	A	G
AX-94523339	G/T	1A	549522227	+	NA	NA	NA	NA	NA	NA	T	T	G	T	T	T	G	G	T	T	G	T	G	G	G	T	G	T	G	G	G	G	G	G	G	T	T	G	G	G	G	G	T	G	G	G	G	G	T
AX-109922867	C/T	1A	549663432	+	NA	NA	NA	NA	NA	NA	C	T	C	N	C	C	C	C	T	C	C	T	C	C	C	C	C	C	C	C	C	C	C	C	C	T	T	C	C	C	C	C	T	C	C	C	C	C	T
AX-108813013	C/T	1A	549668707	+	NA	NA	NA	NA	NA	NA	C	T	C	T	C	C	C	C	T	C	C	T	C	C	C	C	C	C	C	C	C	C	C	C	C	T	T	C	C	C	C	C	T	C	C	C	C	C	T
AX-94491525	G/A	1A	549671064	+	NA	NA	NA	NA	NA	NA	G	A	G	A	G	G	G	G	A	G	G	A	G	G	G	G	G	G	G	G	G	G	G	G	G	A	A	G	G	G	G	G	A	G	G	G	G	G	A
AX-109867406	C/T	1A	549672818	+	NA	NA	NA	NA	NA	NA	C	T	C	T	C	C	C	C	T	C	C	T	C	C	C	C	C	C	C	C	C	C	C	C	C	T	T	C	C	C	C	C	T	C	C	C	C	C	T
AX-94401483	T/C	1A	549695863	+	NA	NA	NA	NA	NA	NA	T	C	T	C	T	T	T	T	C	T	T	C	T	T	T	T	T	T	T	T	T	T	T	T	T	T	C	T	T	T	T	T	C	T	T	T	T	T	C
AX-111067477	A/G	1A	549704338	+	NA	NA	NA	NA	NA	NA	A	G	A	G	A	A	A	A	G	A	A	G	A	A	A	A	A	A	A	A	A	A	A	A	A	G	G	A	A	A	A	A	G	A	A	A	A	A	G
AX-179559814	A/G	1A	549704338	+	NA	NA	NA	NA	NA	NA	A	G	A	G	A	A	A	A	G	A	A	G	A	A	A	A	A	A	A	A	A	A	A	A	A	G	G	A	A	A	A	A	G	A	A	A	A	A	G
AX-86185260	C/T	1A	549704501	+	NA	NA	NA	NA	NA	NA	C	T	C	T	C	C	C	C	T	C	C	T	C	C	C	C	C	C	C	C	C	C	C	C	C	C	T	C	C	C	C	C	T	C	C	C	C	C	T
AX-86185261	C/T	1A	549704501	+	NA	NA	NA	NA	NA	NA	C	T	C	T	C	C	C	C	T	C	C	T	C	C	C	C	C	C	C	C	C	C	C	C	C	C	T	C	C	C	C	C	T	C	C	C	C	C	T
AX-94722837	T/G	1A	549840341	+	NA	NA	NA	NA	NA	NA	T	G	T	G	T	T	T	T	G	T	T	G	T	T	T	T	T	T	T	T	T	T	T	T	T	G	G	T	T	T	T	T	G	T	T	T	T	T	G
AX-179561206	C/A	1A	549845289	+	NA	NA	NA	NA	NA	NA	N	A	C	A	C	C	C	C	A	C	C	A	C	C	C	C	C	C	C	C	C	C	C	C	C	A	A	C	N	C	C	C	A	C	C	C	C	C	A
AX-95660156	C/A	1A	549845289	+	NA	NA	NA	NA	NA	NA	C	A	C	A	C	C	C	C	A	C	C	A	C	C	C	C	C	C	C	C	C	C	C	C	C	A	A	C	C	C	C	C	A	C	C	C	C	C	A
AX-179558942	G/A	1A	550344021	+	NA	NA	NA	NA	NA	NA	A	G	G	G	A	A	G	G	G	A	A	G	G	A	G	A	G	A	G	G	G	G	R	G	G	G	G	A	G	G	G	A	G	A	G	G	G	A	G
AX-95658585	G/A	1A	550344021	+	NA	NA	NA	NA	NA	NA	A	G	G	G	A	A	G	G	G	A	A	G	G	A	G	A	G	A	G	G	G	G	R	G	G	G	G	A	G	G	G	A	G	A	G	G	G	A	G
AX-178062468	C/A	1A	550441969	+	NA	NA	NA	NA	NA	NA	C	C	C	C	C	C	C	C	C	C	A	C	C	A	C	C	C	A	C	C	C	C	M	C	C	C	C	A	C	C	C	A	C	A	C	C	C	A	C
AX-95652764	C/A	1A	550441969	+	NA	NA	NA	NA	NA	NA	C	C	C	C	C	C	C	C	C	C	A	C	C	A	C	C	C	A	C	C	C	C	M	C	C	C	C	A	C	C	C	A	C	A	C	C	C	A	C
AX-108870990	C/A	1A	550610667	+	NA	NA	NA	NA	NA	NA	C	C	C	C	C	C	C	C	C	C	A	C	C	A	C	C	C	A	C	C	C	C	M	C	C	C	C	A	C	C	C	A	C	A	C	C	C	A	C
AX-179561343	A/G	1A	550613149	+	NA	NA	NA	NA	NA	NA	A	G	A	G	A	A	A	A	G	A	A	G	A	A	A	A	A	A	A	A	A	A	A	A	A	A	G	A	A	A	A	A	G	A	A	A	A	A	G
AX-95629169	A/G	1A	550613149	+	NA	NA	NA	NA	NA	NA	A	G	A	G	A	A	A	A	G	A	A	G	A	A	N	A	A	A	A	A	A	A	A	A	A	A	G	A	A	A	A	A	G	A	A	A	A	A	G
AX-109072120	G/A	1A	550618372	+	NA	NA	NA	NA	NA	NA	G	G	G	G	G	G	G	G	G	G	A	G	G	A	G	G	G	A	G	G	G	G	R	G	G	G	G	A	G	G	G	A	G	A	G	G	G	A	G
AX-110906580	A/G	1A	550686465	+	NA	NA	NA	NA	NA	NA	A	A	A	A	A	A	A	A	A	A	G	A	A	G	A	A	A	A	A	A	A	A	R	A	A	A	A	G	A	A	A	G	A	G	A	A	A	G	A
AX-94793167	T/C	1A	550970059	+	NA	NA	NA	NA	NA	NA	C	C	C	T	T	T	T	T	T	C	C	C	T	T	T	C	T	C	T	T	T	T	C	T	T	T	T	T	T	T	T	C	C	T	T	T	T	T	T
AX-110067057	G/A	1A	550973073	+	NA	NA	NA	NA	NA	NA	G	G	G	G	G	G	G	G	G	G	A	G	G	A	G	G	G	G	G	G	G	G	G	G	G	G	G	A	G	G	G	A	G	A	G	G	G	A	G
AX-94534146	A/C	1A	551050669	+	NA	NA	NA	NA	NA	NA	A	A	A	A	A	A	A	A	A	A	C	A	A	C	A	A	A	A	A	A	A	A	M	A	A	A	A	C	A	A	A	C	A	C	A	A	A	C	A
AX-111793470	A/C	1A	551132121	+	NA	NA	NA	NA	NA	NA	A	A	A	A	A	A	A	A	A	A	C	A	A	C	A	A	A	A	A	A	A	A	M	A	A	A	A	C	A	A	A	C	A	C	A	A	A	C	A
AX-179559139	C/T	1A	551315328	+	NA	NA	NA	NA	NA	NA	C	C	C	C	C	C	T	C	C	C	C	C	C	C	T	C	T	C	T	T	T	T	C	T	C	C	C	C	C	C	C	C	C	C	T	T	T	C	C
AX-99585844	C/T	1A	551315328	+	NA	NA	NA	NA	NA	NA	C	C	C	C	C	C	T	C	C	C	C	C	C	C	T	C	T	C	T	T	T	T	C	T	C	C	C	C	C	C	C	C	C	C	T	T	N	C	C
AX-112288258	G/A	1A	551320941	+	NA	NA	NA	NA	NA	NA	G	G	G	G	G	G	R	G	G	G	G	G	G	G	R	G	R	G	R	R	R	R	G	R	G	G	G	G	G	G	G	G	G	G	R	R	R	G	G
AX-179558966	G/A	1A	551320941	+	NA	NA	NA	NA	NA	NA	G	G	G	G	G	G	A	G	G	G	G	G	G	G	A	G	A	G	A	A	A	A	G	A	G	G	G	G	G	G	G	G	G	G	A	A	A	G	G
AX-95163815	T/C	1A	551321370	+	NA	NA	NA	NA	NA	NA	T	T	T	T	T	T	Y	T	T	T	Y	T	T	Y	Y	T	Y	T	Y	Y	Y	Y	T	N	T	T	T	Y	T	T	T	Y	T	Y	Y	Y	Y	Y	T
AX-179477165	T/C	1A	551460874	+	NA	NA	NA	NA	NA	NA	T	T	T	T	T	T	C	T	T	T	T	T	T	T	C	T	C	T	C	C	C	C	T	C	T	T	T	T	T	T	T	T	T	T	C	C	C	T	T
AX-179559791	T/C	1A	551461696	+	NA	NA	NA	NA	NA	NA	T	T	T	T	T	T	C	T	T	T	C	T	T	C	C	T	C	T	C	C	C	C	N	C	T	T	N	C	T	T	T	C	N	C	C	C	C	C	T
AX-109492264	C/T	1A	551465825	+	NA	NA	NA	NA	NA	NA	C	C	C	C	C	C	C	C	C	C	T	C	C	T	C	C	C	C	C	C	C	C	Y	C	C	C	C	T	C	C	C	T	C	T	C	C	C	T	C
AX-179558968	A/G	1A	551484519	+	NA	NA	NA	NA	NA	NA	A	G	A	G	A	A	A	A	G	A	G	G	A	G	A	A	A	A	A	A	A	A	G	A	A	A	G	G	A	A	A	G	G	G	A	A	A	G	G
AX-95631229	A/G	1A	551484519	+	NA	NA	NA	NA	NA	NA	A	G	A	G	A	A	A	A	G	A	G	G	A	G	A	A	A	A	A	A	A	A	R	A	A	A	G	G	A	A	A	G	G	G	A	A	A	G	G
AX-108813389	G/A	1A	551496564	+	NA	NA	NA	NA	NA	NA	A	G	A	G	A	A	G	A	G	A	G	G	A	G	G	A	G	A	G	G	G	G	R	G	A	A	G	G	A	A	A	G	G	G	G	G	G	G	G
AX-112286513	G/T	1A	551609890	+	NA	NA	NA	NA	NA	NA	G	G	G	G	G	G	G	T	G	G	G	G	G	G	G	G	G	T	G	G	G	G	G	G	T	G	G	G	G	G	G	G	G	G	G	G	G	G	G
AX-110442928	G/C	1A	551632462	+	NA	NA	NA	NA	NA	NA	G	G	G	G	G	G	G	C	G	G	G	G	G	G	G	G	G	C	G	G	G	G	G	G	C	G	G	G	G	G	G	G	G	G	G	G	G	G	G
AX-94747858	G/A	1A	551656460	+	NA	NA	NA	NA	NA	NA	A	A	A	G	G	G	G	G	G	A	A	A	G	G	G	A	G	A	G	G	G	G	A	G	G	G	G	N	G	G	G	G	A	G	G	R	G	G	G
AX-95104798	G/A	1A	551982242	+	NA	NA	NA	NA	NA	NA	A	A	A	G	A	A	G	G	G	A	A	A	G	G	G	A	G	G	G	G	G	G	A	G	G	G	G	G	G	G	G	G	A	G	G	G	G	G	A
AX-94804231	G/C	1A	551982329	+	NA	NA	NA	NA	NA	NA	G	G	G	G	G	G	G	C	G	G	C	G	G	C	G	G	G	C	G	G	G	G	S	G	C	C	G	C	G	G	G	C	G	C	G	G	G	C	G
AX-95205762	A/G	1A	552844351	+	NA	NA	NA	NA	NA	NA	A	A	A	A	A	A	R	A	A	A	G	A	A	G	R	A	R	A	R	R	R	R	R	R	A	A	A	G	A	A	A	G	A	G	R	R	R	G	A
AX-179560383	G/A	1A	553706867	+	NA	NA	NA	NA	NA	NA	R	G	R	G	G	G	R	G	G	G	G	G	G	G	G	G	G	G	G	G	G	G	G	G	G	G	G	G	G	G	G	G	G	G	G	G	G	G	G
AX-109276847	G/A	1A	553900373	+	NA	NA	NA	NA	NA	NA	A	A	G	A	A	A	G	G	A	A	A	A	G	A	G	A	G	G	G	G	G	G	R	G	G	G	A	A	G	G	G	A	A	A	G	G	G	A	A
AX-94645378	C/T	1A	554104922	+	NA	NA	NA	NA	NA	NA	C	C	C	C	C	C	C	C	C	C	C	C	C	C	C	C	C	C	C	C	C	C	C	C	C	C	C	C	C	C	C	C	T	C	C	C	C	C	C
AX-109940009	A/T	1A	554124108	+	NA	NA	NA	NA	NA	NA	T	T	T	T	T	T	A	A	T	T	A	T	T	A	A	T	A	A	A	A	A	A	N	A	A	A	T	A	T	T	T	A	T	A	A	A	A	A	T
AX-111701631	T/C	1A	554131720	+	NA	NA	NA	NA	NA	NA	T	T	T	T	T	T	C	C	T	T	C	T	T	C	C	T	C	C	C	C	C	C	Y	C	C	C	T	C	T	T	T	C	T	C	C	C	C	C	T
AX-112289145	C/T	1A	554208280	+	NA	NA	NA	NA	NA	NA	C	C	C	C	C	C	T	T	C	C	C	C	C	C	T	C	T	T	T	T	T	T	C	T	T	T	C	C	C	C	C	C	C	C	T	T	T	C	C
AX-179560592	C/T	1A	554208280	+	NA	NA	NA	NA	NA	NA	C	C	C	C	C	C	T	T	C	C	C	C	C	C	T	C	T	T	T	T	T	T	C	T	T	T	C	C	C	C	C	C	C	C	T	T	T	C	C
AX-111136687	T/C	1A	554211078	+	NA	NA	NA	NA	NA	NA	C	C	C	C	C	C	T	T	C	C	T	C	C	T	T	C	T	T	T	T	T	T	Y	T	T	T	C	T	C	C	C	T	C	T	T	T	T	T	C
AX-110383419	T/C	1A	554225720	+	NA	NA	NA	NA	NA	NA	C	C	C	C	C	C	T	T	C	C	T	C	C	T	T	C	T	T	T	T	T	T	Y	T	T	T	C	T	C	C	C	T	C	T	T	T	T	T	C
AX-110052686	C/G	1A	554227561	+	NA	NA	NA	NA	NA	NA	C	C	C	C	C	C	C	C	C	C	G	C	C	G	C	C	C	C	C	C	C	C	S	C	C	C	C	G	C	C	C	G	C	G	C	C	C	G	C
AX-109885353	G/A	1A	554229370	+	NA	NA	NA	NA	NA	NA	G	G	G	G	G	G	G	G	G	G	A	G	G	A	G	G	G	G	G	G	G	G	R	G	G	G	G	A	G	G	G	A	G	A	G	G	G	A	G
AX-111130158	C/T	1A	554237205	+	NA	NA	NA	NA	NA	NA	C	C	C	C	C	C	C	C	C	C	T	C	C	T	C	C	C	C	C	C	C	C	Y	C	C	C	C	T	C	C	C	T	C	T	C	C	C	T	C
AX-108773722	A/G	1A	554237297	+	NA	NA	NA	NA	NA	NA	A	A	A	A	A	A	A	A	A	A	G	A	A	G	A	A	A	A	A	A	A	A	R	A	A	A	A	G	A	A	A	G	A	G	A	A	A	G	A
AX-108891843	T/C	1A	555815592	+	NA	NA	NA	NA	NA	NA	T	T	C	T	T	T	C	N	T	T	T	T	C	T	C	T	C	C	C	C	C	C	T	C	C	N	T	T	C	C	C	T	T	T	C	C	C	T	T
AX-111485693	C/T	1A	555826178	+	NA	NA	NA	NA	NA	NA	T	T	C	T	T	T	C	C	T	T	T	T	C	T	C	T	C	C	C	C	C	C	T	C	C	C	T	T	C	C	C	T	T	T	C	C	C	T	T
AX-94810466	C/T	1A	556793939	+	NA	NA	NA	NA	NA	NA	T	T	T	C	C	C	C	C	C	T	T	T	T	C	C	T	C	T	C	C	C	C	T	C	C	C	C	T	C	C	C	C	T	C	C	C	C	C	C
AX-111215472	G/A	1A	557126732	+	NA	NA	NA	NA	NA	NA	A	G	G	G	A	A	G	G	G	A	G	G	G	G	G	A	G	G	G	G	G	G	G	G	G	G	G	G	G	G	G	G	G	G	G	G	G	A	G
AX-110450911	G/A	1A	557191334	+	NA	NA	NA	NA	NA	NA	R	A	R	A	G	G	G	G	A	G	G	A	G	G	G	G	G	G	G	G	G	G	G	G	G	G	A	G	G	G	G	G	A	G	G	G	G	G	A
AX-110927587	A/G	1A	557196157	+	NA	NA	NA	NA	NA	NA	A	G	A	G	A	A	A	A	G	A	A	G	A	A	A	A	A	A	A	A	A	A	A	A	A	A	G	A	A	A	A	A	G	A	A	A	A	A	G
AX-109878966	A/G	1A	557559265	+	NA	NA	NA	NA	NA	NA	A	G	A	G	A	A	A	A	G	A	A	G	A	A	A	A	A	A	A	A	A	A	A	A	A	A	G	A	A	A	A	A	G	A	A	A	A	A	G
AX-108774192	T/C	1A	557580533	+	NA	NA	NA	NA	NA	NA	T	C	T	C	T	T	T	T	C	T	T	C	T	T	T	T	T	T	T	T	T	T	T	T	T	T	C	T	T	T	T	T	C	T	T	T	T	T	C
AX-109367106	C/T	1A	557875899	+	NA	NA	NA	NA	NA	NA	C	T	C	T	C	C	C	C	T	C	C	T	C	C	C	C	C	C	C	C	C	C	C	C	C	C	T	C	C	C	C	C	T	C	C	C	C	C	T
AX-109348426	G/A	1A	557886247	+	NA	NA	NA	NA	NA	NA	G	A	G	A	G	G	G	G	A	G	G	A	G	G	G	G	G	G	G	G	G	G	G	G	G	G	A	G	G	G	G	G	A	G	G	G	G	G	A
AX-110050907	G/C	1A	557886717	+	NA	NA	NA	NA	NA	NA	G	C	G	C	G	G	G	G	C	G	G	C	G	G	G	G	G	G	G	G	G	G	G	G	G	G	C	G	G	G	G	G	C	G	G	G	G	G	C
AX-110932656	A/G	1A	557952520	+	NA	NA	NA	NA	NA	NA	A	G	A	G	A	A	A	A	G	A	A	G	A	A	A	A	A	A	A	A	A	A	A	A	A	A	G	A	A	A	A	A	G	A	A	A	A	G	G
AX-110415838	G/A	1A	558098839	+	NA	NA	NA	NA	NA	NA	G	A	G	A	G	G	G	G	A	G	G	A	G	G	G	G	G	G	G	G	G	G	G	G	G	G	A	G	G	G	G	G	A	G	G	G	G	G	A
AX-110131778	T/C	1A	558151270	+	NA	NA	NA	NA	NA	NA	T	C	T	C	T	T	T	T	C	T	T	C	T	T	T	T	T	T	T	T	T	T	T	T	T	T	C	T	T	T	T	T	C	T	T	T	T	T	C
AX-95253308	G/C	1A	558185960	+	NA	NA	NA	NA	NA	NA	G	G	G	G	C	C	G	G	N	G	G	G	G	G	G	G	G	G	G	G	G	G	G	G	G	G	G	G	G	G	G	G	C	G	G	G	G	G	G
AX-94725691	C/T	1A	558188799	+	NA	NA	NA	NA	NA	NA	C	T	C	T	C	C	C	C	T	C	C	T	C	C	C	C	C	C	C	C	C	C	C	C	N	C	T	C	C	C	C	C	T	C	C	C	C	C	T
AX-94393159	A/G	1A	558195129	+	NA	NA	NA	NA	NA	NA	A	G	A	G	A	A	A	A	G	A	A	G	A	A	A	A	A	A	A	A	A	A	A	A	A	A	G	A	A	A	A	A	G	A	A	A	A	A	G
AX-111484970	G/A	1A	558196155	+	NA	NA	NA	NA	NA	NA	G	A	G	A	G	G	G	G	A	G	G	A	G	G	G	G	G	G	G	G	G	G	G	G	G	G	A	G	G	G	G	G	A	G	G	G	G	G	A
AX-95654184	G/A	1A	558261773	+	NA	NA	NA	NA	NA	NA	G	A	G	A	G	G	G	G	A	G	G	A	G	G	G	G	G	G	G	G	G	G	G	G	G	G	A	G	G	G	G	G	A	G	G	G	G	G	A
AX-112289151	A/G	1A	558307178	+	NA	NA	NA	NA	NA	NA	A	G	A	G	A	A	A	A	G	A	A	G	A	A	A	A	A	A	A	A	A	A	A	A	A	A	G	A	A	A	A	A	G	A	A	A	A	A	G
AX-94406447	C/T	1A	558489331	+	NA	NA	NA	NA	NA	NA	C	T	C	T	C	C	C	C	T	C	C	T	C	C	C	C	C	C	C	C	C	C	C	C	C	C	T	C	C	C	C	C	T	C	C	C	C	C	T
AX-158568808	T/C	1A	558489897	+	NA	NA	NA	NA	NA	NA	T	C	T	C	T	T	C	T	C	T	C	C	T	C	C	T	T	T	T	T	T	T	T	T	T	C	C	C	T	T	T	C	C	C	C	T	T	C	C
AX-179560168	T/C	1A	558489897	+	NA	NA	NA	NA	NA	NA	T	C	T	C	T	T	C	T	C	T	C	C	T	C	C	T	T	T	T	T	T	T	T	T	T	C	C	C	T	T	T	C	C	C	C	T	T	C	C
AX-86162921	C/A	1A	558515681	+	NA	NA	NA	NA	NA	NA	C	A	C	A	C	C	C	C	A	C	C	A	C	C	C	C	C	C	C	C	C	C	C	C	C	C	A	C	C	C	C	C	A	C	C	C	C	C	A
AX-86162922	C/A	1A	558515681	+	NA	NA	NA	NA	NA	NA	C	A	C	A	C	C	C	C	A	C	C	A	C	C	C	C	C	C	C	C	C	C	C	C	C	C	A	C	C	C	C	C	A	C	C	C	C	C	A
AX-110377453	C/T	1A	558537003	+	NA	NA	NA	NA	NA	NA	C	T	C	T	C	C	C	C	T	C	C	T	C	C	C	C	C	C	C	C	C	C	C	C	C	C	T	C	C	C	C	C	T	C	C	C	C	C	T
AX-109282272	A/G	1A	558537985	+	NA	NA	NA	NA	NA	NA	A	G	A	G	A	A	A	A	G	A	A	G	A	A	A	A	A	A	A	A	A	A	A	A	A	A	G	A	A	A	A	A	G	A	A	A	A	A	G
AX-95629547	G/A	1A	558538866	+	NA	NA	NA	NA	NA	NA	G	A	G	A	G	G	G	N	A	G	G	A	G	G	R	G	G	G	G	G	G	G	G	G	G	G	A	G	G	G	G	G	A	G	G	G	G	G	A
AX-94384125	C/T	1A	558540826	+	NA	NA	NA	NA	NA	NA	C	T	C	T	C	C	C	C	T	C	C	T	C	C	C	C	C	C	C	C	C	C	C	C	C	C	T	C	C	C	C	C	T	C	C	C	C	C	T
AX-95630265	C/T	1A	558540826	+	NA	NA	NA	NA	NA	NA	C	T	C	T	C	C	C	C	T	C	C	T	C	C	C	C	C	C	C	C	C	C	C	C	C	C	T	C	C	C	C	C	T	C	C	C	C	C	T
AX-109561473	G/A	1A	558541135	+	NA	NA	NA	NA	NA	NA	G	A	G	A	G	G	G	G	A	G	G	A	G	G	G	G	G	G	G	G	G	G	G	G	G	G	A	G	G	G	G	G	A	G	G	G	G	G	A
AX-111711824	T/G	1A	558547008	+	NA	NA	NA	NA	NA	NA	T	G	T	G	T	T	T	T	G	T	T	G	T	T	T	T	T	T	T	T	T	T	T	T	T	T	G	T	T	T	T	T	G	T	T	T	T	T	G
AX-94491768	C/T	1A	558591438	+	NA	NA	NA	NA	NA	NA	C	T	C	T	C	C	C	C	T	C	N	T	C	C	C	C	C	C	C	C	C	C	C	C	C	C	T	C	C	C	C	C	Y	C	C	C	C	C	N
AX-95628765	C/T	1A	558591438	+	NA	NA	NA	NA	NA	NA	C	T	C	T	C	C	C	C	T	C	C	T	C	C	C	C	C	C	C	C	C	C	C	C	C	C	T	C	C	C	C	C	T	C	C	C	C	C	T
AX-86171566	A/G	1A	558591662	+	NA	NA	NA	NA	NA	NA	A	G	A	G	A	A	A	A	N	A	A	G	A	A	N	A	A	A	A	A	A	A	A	A	A	A	G	A	A	A	A	A	G	A	A	A	A	A	G
AX-111642264	A/G	1A	559231551	+	NA	NA	NA	NA	NA	NA	A	G	A	G	A	A	A	A	G	A	A	G	A	A	A	A	A	A	A	A	A	A	A	A	A	A	G	A	A	A	N	A	G	A	A	A	A	A	G
AX-110973245	G/A	1A	559801483	+	NA	NA	NA	NA	NA	NA	G	A	G	A	G	G	G	G	A	G	G	A	G	G	G	G	G	G	G	G	G	G	G	G	G	G	A	G	G	G	G	G	A	G	G	G	G	G	A
AX-110595645	G/T	1A	559836698	+	NA	NA	NA	NA	NA	NA	G	T	G	T	G	G	G	G	T	G	G	T	G	G	G	G	G	G	G	G	G	G	G	G	G	G	T	G	G	G	G	G	T	G	G	G	G	G	T
AX-108824028	G/A	1A	559837405	+	NA	NA	NA	NA	NA	NA	G	A	G	A	G	G	G	G	A	G	G	A	G	G	G	G	G	G	G	G	G	G	G	G	G	G	A	G	G	G	G	G	A	G	G	G	G	G	A
AX-109827916	T/C	1A	560460932	+	NA	NA	NA	NA	NA	NA	T	C	T	C	T	T	T	T	C	T	T	C	T	T	T	T	T	T	T	T	T	T	T	T	T	T	C	T	T	T	T	T	C	T	T	T	T	T	C
AX-111741007	T/C	1A	560465153	+	NA	NA	NA	NA	NA	NA	T	C	T	C	T	T	T	T	C	T	T	C	T	T	T	T	T	T	T	T	T	T	T	T	T	T	C	T	T	T	T	T	C	T	T	T	T	T	C
AX-109014157	A/G	1A	560467669	+	NA	NA	NA	NA	NA	NA	A	G	A	G	A	A	A	A	G	A	A	G	A	A	A	A	A	A	A	A	A	A	A	A	A	A	G	A	A	A	A	A	G	A	A	A	A	A	G
AX-94722894	G/A	1A	563755047	+	NA	NA	NA	NA	NA	NA	G	G	G	G	G	G	G	G	G	G	A	A	G	A	G	G	G	G	G	G	G	G	A	G	G	G	G	G	G	G	G	A	G	G	G	G	G	G	A
AX-89727488	C/T	1A	564573382	+	NA	NA	NA	NA	NA	NA	Y	T	C	T	N	Y	C	C	T	C	Y	T	Y	Y	C	C	C	Y	C	C	C	Y	C	C	C	C	T	C	Y	Y	C	C	T	Y	N	C	Y	C	T
AX-179558207	A/C	1A	564749321	+	NA	NA	NA	NA	NA	NA	A	C	A	C	A	A	A	A	C	A	A	C	A	A	A	A	A	A	A	A	A	A	A	A	A	A	C	A	A	A	A	C	C	A	A	A	A	A	C
AX-95630768	A/C	1A	564749321	+	NA	NA	NA	NA	NA	NA	A	C	A	C	A	A	A	A	C	A	A	C	A	A	A	A	A	A	A	A	A	A	A	A	A	A	C	A	A	A	A	C	C	A	A	A	A	A	C
AX-108870081	A/G	1A	565393853	+	NA	NA	NA	NA	NA	NA	G	A	A	A	G	G	A	A	A	G	G	A	A	G	A	G	A	A	A	A	A	A	R	A	A	A	A	G	A	A	A	A	A	G	A	A	A	G	A
AX-109982403	T/C	1A	565393991	+	NA	NA	NA	NA	NA	NA	C	T	T	T	C	C	T	T	T	C	C	T	T	C	T	C	T	T	T	T	T	T	Y	T	T	T	T	C	T	T	T	T	T	C	T	T	T	C	T
AX-111642140	C/T	1A	565522594	+	NA	NA	NA	NA	NA	NA	C	C	C	C	C	C	C	C	C	C	C	C	C	T	C	C	C	C	C	C	C	C	C	C	C	C	C	T	C	C	C	C	C	T	C	C	C	T	C
AX-110583498	C/T	1A	565614284	+	NA	NA	NA	NA	NA	NA	C	T	C	T	C	C	C	C	T	C	C	T	C	C	C	C	C	C	C	C	C	C	C	C	C	C	T	C	C	C	C	C	T	C	C	C	C	C	T
AX-110954177	G/A	1A	565623597	+	NA	NA	NA	NA	NA	NA	G	A	G	A	G	G	G	G	R	G	G	A	G	G	G	G	G	G	G	G	G	G	G	G	G	G	A	G	G	G	G	G	A	G	G	G	G	G	A
AX-109272492	C/A	1A	565624478	+	NA	NA	NA	NA	NA	NA	C	A	C	A	C	C	C	C	A	C	C	A	C	C	C	C	C	C	C	C	C	C	C	C	C	C	A	C	C	C	C	C	A	C	C	C	C	C	A
AX-108825802	C/T	1A	565625238	+	NA	NA	NA	NA	NA	NA	C	C	C	C	C	C	C	C	C	C	C	C	C	T	C	C	C	C	C	C	C	C	C	C	C	C	C	T	C	C	C	C	C	T	C	C	C	T	C
AX-110444280	C/T	1A	565736786	+	NA	NA	NA	NA	NA	NA	C	T	C	T	C	C	C	C	T	C	C	T	C	C	C	C	C	C	C	C	C	C	C	C	C	C	T	C	C	C	C	C	T	C	C	C	C	C	T
AX-111456113	G/C	1A	565736825	+	NA	NA	NA	NA	NA	NA	G	G	G	G	G	G	G	G	G	G	G	G	G	C	G	G	G	G	G	G	G	G	G	G	G	G	G	C	G	G	G	G	G	C	G	G	G	C	G
AX-109816770	C/A	1A	565993490	+	NA	NA	NA	NA	NA	NA	C	A	C	A	C	C	C	C	A	C	C	A	C	C	C	C	C	C	C	C	C	C	C	C	C	C	A	C	C	C	C	C	A	C	C	C	C	C	A
AX-109826247	T/A	1A	565999644	+	NA	NA	NA	NA	NA	NA	T	A	T	A	T	T	T	T	A	T	T	A	T	T	T	T	T	T	T	T	T	T	T	T	T	T	A	T	T	T	T	T	A	T	T	T	T	T	A
AX-110971082	A/G	1A	566004575	+	NA	NA	NA	NA	NA	NA	A	A	A	A	A	A	A	A	A	A	A	A	A	G	A	A	A	A	A	A	A	A	A	A	A	A	A	G	A	A	A	A	A	G	A	A	A	G	A
AX-110592622	C/G	1A	566006047	+	NA	NA	NA	NA	NA	NA	C	C	C	C	C	C	C	C	C	C	C	C	C	G	C	C	C	C	C	C	C	C	C	C	C	C	C	G	C	C	C	C	C	G	C	C	C	G	C
AX-110932792	G/A	1A	566007345	+	NA	NA	NA	NA	NA	NA	G	G	G	G	G	G	G	G	G	G	G	G	G	A	G	G	G	G	G	G	G	G	G	G	G	G	G	A	G	G	G	G	G	A	G	G	G	A	G
AX-179477314	C/T	1A	566010795	+	NA	NA	NA	NA	NA	NA	C	T	C	T	C	C	C	C	T	C	C	T	C	T	C	C	C	C	C	C	C	C	C	C	C	C	T	T	C	C	C	C	T	T	C	C	C	T	T
AX-112287049	T/C	1A	566011001	+	NA	NA	NA	NA	NA	NA	T	C	T	C	T	T	T	T	C	T	T	C	T	C	T	T	T	T	T	T	T	T	T	T	T	T	C	C	T	T	T	T	C	C	T	T	T	C	C
AX-179560834	T/C	1A	566011001	+	NA	NA	NA	NA	NA	NA	T	C	T	C	T	T	T	T	C	T	T	C	T	C	T	T	T	T	T	T	T	T	T	T	T	T	C	C	T	T	T	T	C	C	T	T	T	C	C
AX-179477313	A/G	1A	566011115	+	NA	NA	NA	NA	NA	NA	R	R	A	R	A	A	R	A	R	A	A	R	A	R	A	A	A	A	A	A	A	A	A	A	A	A	G	R	A	A	A	A	G	R	A	A	R	G	G
AX-110717012	C/T	1A	566015839	+	NA	NA	NA	NA	NA	NA	C	C	C	C	C	C	C	C	C	C	C	C	C	T	C	C	C	C	C	C	C	C	C	C	C	C	C	T	C	C	C	C	C	T	C	C	C	T	C
AX-108935491	C/T	1A	566016011	+	NA	NA	NA	NA	NA	NA	C	C	C	C	C	C	C	C	C	C	C	C	C	T	C	C	C	C	C	C	C	C	C	C	C	C	C	T	C	C	C	C	C	T	C	C	C	T	C
AX-110480890	A/G	1A	566025189	+	NA	NA	NA	NA	NA	NA	A	A	A	A	A	A	A	A	A	A	A	A	A	G	A	A	A	A	A	A	A	A	A	A	A	A	A	G	A	A	A	A	A	G	A	A	A	G	A
AX-111019905	G/A	1A	566027848	+	NA	NA	NA	NA	NA	NA	G	A	G	A	G	G	G	G	A	G	G	A	G	G	G	G	G	G	G	G	G	G	G	G	G	G	A	G	G	G	G	G	A	G	G	G	G	G	A
AX-111590368	A/G	1A	566064010	+	NA	NA	NA	NA	NA	NA	A	A	A	A	A	A	A	A	A	A	A	A	A	G	A	A	A	A	A	A	A	A	A	A	A	A	A	G	A	A	A	A	A	G	A	A	A	G	A
AX-110377984	C/T	1A	566064814	+	NA	NA	NA	NA	NA	NA	C	C	C	C	C	C	C	C	C	C	C	C	C	T	C	C	C	C	C	C	C	C	C	C	C	C	C	T	C	C	C	C	C	T	C	C	C	T	C
AX-109945465	C/G	1A	566064935	+	NA	NA	NA	NA	NA	NA	C	G	C	G	C	C	C	C	G	C	C	G	C	C	C	C	C	C	C	C	C	C	C	C	C	C	G	C	C	C	C	C	G	C	C	C	C	C	G
AX-109846495	C/T	1A	566065101	+	NA	NA	NA	NA	NA	NA	C	C	C	C	C	C	C	C	C	C	C	C	C	T	C	C	C	C	C	C	C	C	C	C	C	C	C	T	C	C	C	C	C	T	C	C	C	T	C
AX-109272385	C/T	1A	566126601	+	NA	NA	NA	NA	NA	NA	C	T	C	T	C	C	C	C	T	C	C	T	C	C	C	C	C	C	C	C	C	C	C	C	C	C	T	C	C	C	C	C	T	C	C	C	C	C	T
AX-108865803	T/C	1A	566220687	+	NA	NA	NA	NA	NA	NA	T	C	T	C	T	T	T	T	C	T	T	C	T	T	T	T	T	T	T	T	T	T	T	T	T	T	C	T	T	T	T	T	C	T	T	T	T	T	C
AX-108865635	A/T	1A	566359084	+	NA	NA	NA	NA	NA	NA	A	A	A	A	A	A	A	A	A	A	A	A	A	T	A	A	A	A	A	A	A	A	A	A	A	A	A	T	A	A	A	T	A	T	A	A	A	T	A
AX-109885148	A/G	1A	566371996	+	NA	NA	NA	NA	NA	NA	A	A	A	A	A	A	A	A	A	A	A	A	A	G	A	A	A	A	A	A	A	A	A	A	A	A	A	G	A	A	A	G	A	G	A	A	A	G	A
AX-111575061	A/G	1A	566372095	+	NA	NA	NA	NA	NA	NA	A	A	A	A	A	A	A	A	A	A	A	A	A	G	A	A	A	A	A	A	A	A	A	A	A	A	A	G	A	A	A	A	A	G	A	A	A	G	A
AX-111569331	C/T	1A	566379760	+	NA	NA	NA	NA	NA	NA	C	C	C	C	C	C	C	C	C	C	C	C	C	T	C	C	C	C	C	C	C	C	C	C	C	C	C	T	C	C	C	T	C	T	C	C	C	T	C
AX-179557324	G/A	1A	566480170	+	NA	NA	NA	NA	NA	NA	G	G	G	G	G	G	G	G	G	G	G	G	G	A	G	G	G	G	G	G	G	G	R	G	G	G	G	A	G	G	G	A	G	A	G	G	G	A	G
AX-94642282	G/A	1A	566480170	+	NA	NA	NA	NA	NA	NA	G	G	G	G	G	G	G	G	G	G	G	G	G	A	G	G	G	G	G	G	G	G	G	G	G	G	G	A	G	G	G	A	G	A	G	G	G	A	G
AX-111173124	C/T	1A	566481452	+	NA	NA	NA	NA	NA	NA	C	C	C	C	C	C	C	C	C	C	C	C	C	T	C	C	C	C	C	C	C	C	Y	C	C	C	C	T	C	C	C	T	C	T	C	C	C	T	C
AX-108990247	C/T	1A	566688065	+	NA	NA	NA	NA	NA	NA	T	T	C	T	T	T	C	C	T	T	T	T	C	C	C	T	C	C	C	C	C	C	N	C	C	C	T	C	C	C	C	T	T	C	C	C	C	C	T
AX-179562604	G/A	1A	566689032	+	NA	NA	NA	NA	NA	NA	A	A	G	A	R	A	G	G	N	A	A	A	G	G	R	A	G	G	G	G	G	G	G	G	G	G	A	G	G	G	G	G	A	G	G	G	G	G	A
AX-111568646	C/T	1A	566699799	+	NA	NA	NA	NA	NA	NA	T	T	C	T	T	T	C	C	T	T	T	T	C	C	C	T	C	C	C	C	C	C	C	C	C	C	T	C	C	C	C	C	T	C	C	C	C	C	T
AX-110153351	T/G	1A	567049789	+	NA	NA	NA	NA	NA	NA	G	G	T	G	G	G	T	T	G	G	G	G	T	T	T	G	T	T	T	T	T	T	N	T	T	T	G	T	T	T	T	T	G	T	T	T	T	T	G
AX-111203882	T/C	1A	567326920	+	NA	NA	NA	NA	NA	NA	C	C	T	C	C	C	T	T	C	C	C	C	T	T	T	C	T	T	T	T	T	T	T	T	T	T	C	T	T	T	T	T	C	T	T	T	T	T	C
AX-109002990	T/C	1A	567477708	+	NA	NA	NA	NA	NA	NA	C	C	T	C	C	C	T	T	C	C	C	C	T	T	T	C	T	T	T	T	T	T	Y	T	T	T	C	T	N	T	T	C	C	T	T	T	T	T	C
AX-110373408	T/C	1A	567522583	+	NA	NA	NA	NA	NA	NA	C	C	T	C	C	C	T	T	C	C	C	C	T	T	T	C	T	T	T	T	T	T	T	T	T	T	C	T	T	T	T	C	C	T	T	T	T	T	C
[truncated: 37,384 more rows]
[truncated: 94 more columns]
